# Supplementary material for: Zika virus drug targets: a missing link in drug design and discovery – a route map to fill the gap
Source: Royal Society of Chemistry journal article supplement (doi:10.1039/c6ra12142j), 2016-01-01
Supplement: c6ra12142j1.pdf [file c6ra12142j1.pdf]

# **Zika Virus Drug Targets: A Missing Link In Drug Design And Discovery – A Route Map To Fill The Gap**

Pritika Ramharack<sup>a</sup> and Mahmoud E. S. Soliman<sup>a\*</sup>

Supplementary Material

**Figure S1:** The multiple sequence alignment

```

gi | 534286613 | pdb | 4K6M | A      -GRPGGRTLGEQWKEKLNAMSREEFFKYRREAIIEVDRTEARRARRENNI
gi | 126030613 | pdb | 2HFZ | A      -----
gi | 985757036 | ref | YP_009227205. -GGGTGETLGEKWKARLNQMSALEFYSYKKSIGITEVCREEARRALKDQVA
gi | 985483961 | pdb | 5CCV | A      GTGSQGETLGEKWKKLNQLSRKEFDLYKKSIGITEVDRTEAKEGLKRGEI
gi | 453055587 | pdb | 3VWS | A      -----

gi | 534286613 | pdb | 4K6M | A      VGGHPVSRGSAKLRWLVEKGFVSPIGKVIDLGCGRGGWSYAAATLKKVQE
gi | 126030613 | pdb | 2HFZ | A      -----
gi | 985757036 | ref | YP_009227205.  TGGHAVSRGSAKIRWLEERGLQPYGKVVDLGCGRGGWSYAAATIRKIQVE
gi | 985483961 | pdb | 5CCV | A      T-HHAVSRGSAKLQWVFERNMVIPEGRVIDLGCGRGGWSYCAAGLKKVTE
gi | 453055587 | pdb | 3VWS | A      -----

gi | 534286613 | pdb | 4K6M | A      VRGYTKGGGAGHEEPLMQSYGWNLVSLKSGVDVFFYKPEPSDTLFCDIGE
gi | 126030613 | pdb | 2HFZ | A      -----
gi | 985757036 | ref | YP_009227205.  VRGYTKGGPGHEEPLVQSYGWNIVRLKSGVDVFHMAAEPDCTLLCDIGE
gi | 985483961 | pdb | 5CCV | A      VRGYTKGGPGHEEPPVMSYTYGWNIVKLSMKGKDVFFYLPFEKCDTLFCDIGE
gi | 453055587 | pdb | 3VWS | A      -----

gi | 534286613 | pdb | 4K6M | A      SSPSPVEVEEQRTLRLVLEMTSDWLHRGPREFCIKVLCPYMPKVIKEKMEVLQ
gi | 126030613 | pdb | 2HFZ | A      -----
gi | 985757036 | ref | YP_009227205.  SSSSPVEEETRTLRLVLSMVGDWLEKRPQAFCAIKVLCPYTSMTMETMERLQ
gi | 985483961 | pdb | 5CCV | A      SSPSPVVEESRTIRVLKMPVPEWPKN--NQFCIKVLNFPMPVTVIEHLERLQ
gi | 453055587 | pdb | 3VWS | A      -----

gi | 534286613 | pdb | 4K6M | A      RRFGGGLVRLPLSRNSNHEMYVWVSGAAGNVVHAVNMTSQVLLGRMDRTVW
gi | 126030613 | pdb | 2HFZ | A      -----
gi | 985757036 | ref | YP_009227205.  RRHGGGLVRRVPLCRNSTHEMYVWVSGAKSNIKSVSTTSQVLLGRMD-GPR
gi | 985483961 | pdb | 5CCV | A      RKHGGLVRRNPLSRNSTHEMYWISNGTGNIVSSVNMVSRLLLNRFMTTHR
gi | 453055587 | pdb | 3VWS | A      -----

gi | 534286613 | pdb | 4K6M | A      RGPKYEEDVNLGSGTRAVGKGEVHSNQEKIKKRIQKLKEEFATTHKDP
gi | 126030613 | pdb | 2HFZ | A      -----
gi | 985757036 | ref | YP_009227205.  -----HHHHHKSDDTSKIKNRIRLRREYSSTWHHDEN
gi | 985483961 | pdb | 5CCV | A      RPVKYEEDVNLGSGTRAVASCAPNMKIIIGRIERIRNEHAETWFLDEN
gi | 453055587 | pdb | 3VWS | A      RP-TIEKDVLDGAGTRHRVNAEPEPTEPNMVDVIGERIKRIKEEHSSTWHYDDE
-----GSHMLDNMDVIGERIKRIKEEHNSTWHYDDE
: * . * * * : : : * . * * . * * :

gi | 534286613 | pdb | 4K6M | A      HPYRTWYTHGSYEVKATGSASSLVNGVVLMKSPWDAIANVTTMAMTDTT
gi | 126030613 | pdb | 2HFZ | A      -----
gi | 985757036 | ref | YP_009227205.  HPYRTWYTHGSYEVKPTGSASSLVNGVVRLLSKPWDTITNVTMTAMTDTT
gi | 985483961 | pdb | 5CCV | A      HPYRTWAYHGSYEAPVQGSASSLVNGVVRLLSKPWDDVVTGVTGIAMTDTT
gi | 453055587 | pdb | 3VWS | A      NPYKTWAYHGSYEVKATGSASSMINGVVLLTKFPWVVVPMVTQMAMTDTT
NPYKTWAYHGSYEVKATGSASSMINGVVLLTKFPWVVVPMVTQMAMTDTT
: * * : * * * * * . . * * * * : : * * * * : : * * * * * :

gi | 534286613 | pdb | 4K6M | A      PFGQQRVFKKVDTRKAPEPPAGAKEVLENETTNLWLAFLSREKRPRLCTKE
gi | 126030613 | pdb | 2HFZ | A      -----
gi | 985757036 | ref | YP_009227205.  PFGQQRVFKKVDTRKAPEPEGVYVLENETTNLWLAFLAREKRPRMCSRE
gi | 985483961 | pdb | 5CCV | A      PYGQQRVFKKVDTRVDPDQEGTRQVMNIVSSWLWKLGLKRRKPRVCTKE
gi | 453055587 | pdb | 3VWS | A      PFGQQRVFKKVDTRTPRPMFGTRKVMETAEWLWRTLGRNKRPRLCTRE
PFGQQRVFKKVDTRTPRPLPGTRKVMETAEWLWRTLGRNKRPRLCTRE
* : * * * * * * * * * * . * * * * * : : * * * * * : : * * * * * :

gi | 534286613 | pdb | 4K6M | A      EFIRKVNNSNAALGAVFAEQNQWSTAREAVDDPRFVEMVDEEREHLRGEC
gi | 126030613 | pdb | 2HFZ | A      -----
gi | 985757036 | ref | YP_009227205.  EFIRKVNNSNAALGAMFEEQNQWRSAREAVEDPKFVEMVDEEREHLRGEC
gi | 985483961 | pdb | 5CCV | A      EFINKVRSNAALGAVFEENQWDSARAAVEDEEFKWLVDREHLKLGKC
gi | 453055587 | pdb | 3VWS | A      EFTKKVRTNAAMGAVFTEENQWDSARAAVEDEEFKWLVDREHLKLGKC
** . * * : * * * : * * * * * : * * * * * : * * * * * : * * *

gi | 534286613 | pdb | 4K6M | A      HTCIYNNMMGKREKKPGEFGKAKGSRAIWFMWLGARYLEFEALGFLNEDHW
gi | 126030613 | pdb | 2HFZ | A      -----
gi | 985757036 | ref | YP_009227205.  HTCIYNNMMGKREKKPGEFGKAKGSRAIWFMWLGARFLFEALGFLNEDHW
gi | 985483961 | pdb | 5CCV | A      HSCVYNNMMGKREKKQGEFGKAKGSRAIWFYMWLGARFLFEALGFLNEDHW
gi | 453055587 | pdb | 3VWS | A      GSCVYNNMMGKREKKLGEFGKAKGSRAIWFYMWLGARYLEFEALGFLNEDHW
GSCVYNNMMGKREKKLGEFGKAKGSRAIWFYMWLGVRYLEFEALGFLNEDHW
: * : * * * * * * * * * * * * * * * : * * * * * * * * * *

gi | 534286613 | pdb | 4K6M | A      LSRENSGGGVEGSGVQKLGYLRLDIAAGKQGGKMYADDTAGWDTRITRDTL
gi | 126030613 | pdb | 2HFZ | A      -----
gi | 985757036 | ref | YP_009227205.  LGRKNSGGGVEGLGLQLGYLRLREVGTREPGRRIYADDTAGWDTRITRADL
gi | 985483961 | pdb | 5CCV | A      MGRNSGGGVEGLGLQLGYLILEEMNRPAGGKMYADDTAGWDTRISKFDL
gi | 453055587 | pdb | 3VWS | A      FSRENSYSGVEGGLHKLGYILRDISKIPGGAMYADDTAGWDTRITEDDL
FSRENSYSGVEGGLHKLGYILRDISKIPGGAMYADDTAGWDTRITEDDL
: . * : * * * * * * * * * * * : : * * * * * * * * * * : * *

gi | 534286613 | pdb | 4K6M | A      ENEAKVLELLDGEHRMLARAIIEITYRHKVVKVMPRAAEGKTVMDVISRE
gi | 126030613 | pdb | 2HFZ | A      -----
gi | 985757036 | ref | YP_009227205.  ENEAKVLELLDGEHRRARAIIEITYRHKVVKVMPRAADGRVTMVDISRE
gi | 985483961 | pdb | 5CCV | A      ENEALITNQMEEGHRTLALAVIKYTYQNKVVVLRPAEGGKTVMDIISR
gi | 453055587 | pdb | 3VWS | A      HNEEKITQQMDPEHRQLANAIKFLTYQNKVVVQRPVTPKG-TVMDIISR
HNEEKIQQMDPEHRQLANAIKFLTYQNKVVVQRPVTPKG-TVMDIISR
. * * : : : * * * * * : : * * * * * * * * * * * : * * * * * :

```

|                                |                                                      |
|--------------------------------|------------------------------------------------------|
| gi 534286613 pdb 4K6M A        | DQRGSGQVVTYALNTFTNIAVQLVRLMEAEVIGPQHLEQLPRKNKIAVR    |
| gi 126030613 pdb 2HFZ A        | DQRGSGQVVTYALNTFTNLAVQLVRMMEGEGVIGPDDVEKLTGKGGPKVR   |
| gi 985757036 ref YP_009227205. | DQRGSGQVVTYALNTFTNLVQLIRNMEAEVLEMQDLWLLRKPKE--KVT    |
| gi 985483961 pdb 5CCV A        | DQRGSGQVGTYGLNTFTNMEAQLIRQMEGEGVLSKADLENP-HPLEKKIT   |
| gi 453055587 pdb 3VWS A        | DQRGSGQVGTYGLNTFTNMEAQLVRQMEGEGVLTAKADLENP-HLLEKKIT  |
|                                | ***** *.:*****: .*:.* **.* *: .: : :                 |
| gi 534286613 pdb 4K6M A        | TWLFENGEERVTRMAISGDDCVVKPLDDRFATALHFLNAMSKVRKDIQEW   |
| gi 126030613 pdb 2HFZ A        | TWLFENGEERLSRMAVSGDDCVVKPLDDRFATSLHFLNAMSKVRKDIQEW   |
| gi 985757036 ref YP_009227205. | RWLQSNQWDRLLKRMVSGDDCVVKPIDDRFAHALRFLNDMGKVRKDTQEW   |
| gi 985483961 pdb 5CCV A        | QWLETKGVERLKRMAISGDDCVVKPIDDRFANALLALNDMGKVRKDIQEW   |
| gi 453055587 pdb 3VWS A        | QWLETKGVERLKRMAISGDDCVVKPIDDRFANALLALNDMGKVRKDIQEW   |
|                                | ** :* :*.:***:*****:***** :* ** *.***** :*           |
| gi 534286613 pdb 4K6M A        | KPSHGWHDWQVFPFCSNHFQEIVMKDGRSIVVPCRGQDELIGRARISPGA   |
| gi 126030613 pdb 2HFZ A        | KPSTGWDYDQVFPFCSNHFTELIMKDGRITLVTPCRGQDELIVGRARISPGA |
| gi 985757036 ref YP_009227205. | KPSTGWSNWEEVFPFCSHHFNKLYLKDGRSIVVPCRHQDELIGRARVSPGA  |
| gi 985483961 pdb 5CCV A        | QPSKGWHDWQVFPFCSHHFHELIMKDGRKLVVPCRPQDELIGRARISQGA   |
| gi 453055587 pdb 3VWS A        | QPSKGWHDWQVFPFCSHHFHELIMKDGRKLVVPCRPQDELIGRARISQGA   |
|                                | :** ** :*.:*****:*** : : :*****.:** ** ** ** **      |
| gi 534286613 pdb 4K6M A        | GWNVKTACLAKAYAQMWLLLYFHRRDLRLMANAICSAVPVDWVPTGRTS    |
| gi 126030613 pdb 2HFZ A        | GWNVRDTACLAKSYAQMWLLLYFHRRDLRLMANAICSAVPVNWVPTGRTT   |
| gi 985757036 ref YP_009227205. | GWSIRETACLAKSYAQMWQLLYFHRRDLRLMANAICSAVPVDWVPTGRTT   |
| gi 985483961 pdb 5CCV A        | GWSLRETACLKAYAQMWALMYFHRRDLRLASNAICSAVPVHWVPTSR--    |
| gi 453055587 pdb 3VWS A        | GWSLRETACLKAYAQMWSLMYFHRRDLRLASNAICSAVPVHWVPTSR--    |
|                                | **.:**.:***.:***** *.:***** :*****.****.*            |
| gi 534286613 pdb 4K6M A        | WSIHSGGEWMTTEDMLQVWNRVWIEENEWMMDKTPITSWTDVVPYVGKRED  |
| gi 126030613 pdb 2HFZ A        | WSIHAGGEWMTTEDMLEVWNRVWIEENEWMEDKTPVEKWSVDPYSGKRED   |
| gi 985757036 ref YP_009227205. | WSIHGGEWMTTEDMLMVWNRVWIEENDHMDKTPVTKWTDIPYLGKRED     |
| gi 985483961 pdb 5CCV A        | ----TTHQWMTTEDMLTVWNRVWIEDNPWMDKTPVTTWEDVVPYLGKRED   |
| gi 453055587 pdb 3VWS A        | WSIHAHQWMTTEDMLTVWNRVWIEENPWMDKTPVTTWENVPYLGKRED     |
|                                | :***** *****:* * ****: .* :** *****                  |
| gi 534286613 pdb 4K6M A        | IWCGSLIGTRSRATWAENIYAAINQVRAVIGKE-NYVDYMTSLRRYEDVL   |
| gi 126030613 pdb 2HFZ A        | IWCGSLIGTRARATWAENIQVAINQVRSIIGDE-KYVDYMSLKRVEDTT    |
| gi 985757036 ref YP_009227205. | LWCGSLIGHRRPTTWAENIKDVTVMVRRIGDEEKYMDYLSQVRYLGGEE    |
| gi 985483961 pdb 5CCV A        | QWCGSLIGLTSRATWAQNIPTAIQVRSIIGNE-EFLDYMPMSMKRFRKEE   |
| gi 453055587 pdb 3VWS A        | QWCGSLIGLTSRATWAQNIPTAIQVRSIIGNE-EFLDYMPMSMKRFRKEE   |
|                                | ***** .*:***** : : : ** :**.* : : : : : *            |
| gi 534286613 pdb 4K6M A        | IQEDRVIGSSSHHHHHH-                                   |
| gi 126030613 pdb 2HFZ A        | LVEDTVL-----                                         |
| gi 985757036 ref YP_009227205. | GSTPGVL-----                                         |
| gi 985483961 pdb 5CCV A        | ESEGAIWAAALEHHHHHH                                   |
| gi 453055587 pdb 3VWS A        | ESEGAIW-----                                         |

Figure S2: Ramachandran plot for ZIKV NS5 protein

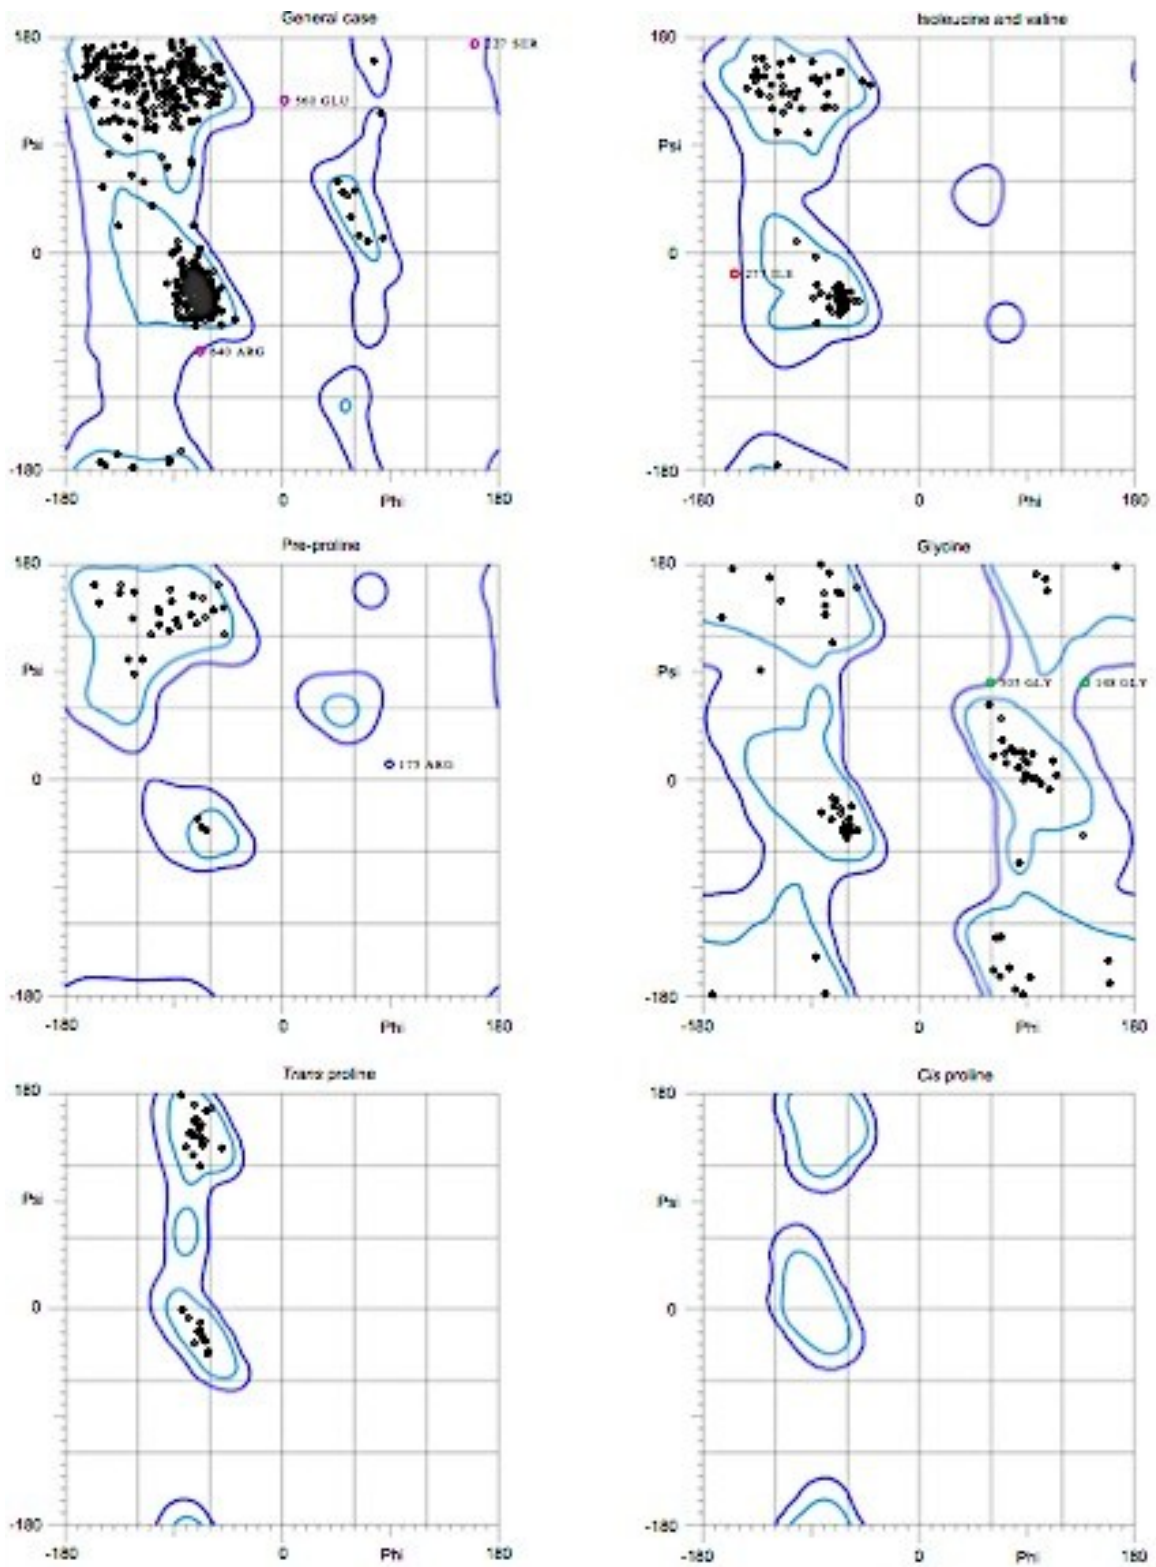

97.2% (876/901) of all residues were in favored (98%) regions.  
99.2% (894/901) of all residues were in allowed (>99.8%) regions.

There were 7 outliers (phi, psi):

148 GLY (138.4, 81.3)  
175 ARG (89.6, 13.4)  
227 SER (161.0, 175.0)  
277 ILE (-153.6, -17.7)  
505 GLY (59.8, 81.0)  
560 GLU (2.5, 127.7)  
640 ARG (-68.3, -81.5)

**Figure S3:** Psipred predicted secondary structure

Conf: }  
 Pred:   
 Pred: CCCCCCHHHHHHHHHHHCCCHHHHHHHHHHCCCCCECHHHH  
 AA: GGGTGETLGEKWKARLNQMSALEFYYSYKKSIGITEVCREEA  
 10 20 30 40

Conf: }  
 Pred:   
 Pred: HHHHHCCCCCCCCCCCCCHHHHHHHHHHHHCCCCCEEEEC  
 AA: RRALKDGVATGGHAVSRGSAKIRWLEERGYLEQPYGKVVVDL  
 50 60 70 80

Conf: }  
 Pred:   
 Pred: CCCCCHHHHHHHHHHCCCCCEEEEEECCCCCCCCCCCCCCCC  
 AA: GCGRGGWSYAAATIRKVQEVRYGTYKGGPGHEEPMPLVQSYG  
 90 100 110 120

Conf: }  
 Pred:   
 Pred: CEEEEEECCCCCCCCCCCCCEEEEEECCCCCCCCCHHHHHH  
 AA: WNIVRLKSGVDVFMMAAEPQDTLLCDIGESSSSPEVEETR  
 130 140 150 160

Conf: }  
 Pred:   
 Pred: HHHHHHHHHHHHHHCCCCCEEEEEECCCCCHHHHHHHHHHH  
 AA: TLRVLSMVGDWLEKRPGAFCIKVLCPYTSTMMETMERLQR  
 170 180 190 200

Conf: }  
 Pred:   
 Pred: HHCCCEEEEEECCCCCCCCCEEEEEECCCCCCCCCHHHHHHHH  
 AA: RHGGGLVVRVPLCRNSTHEMYWVWSGAKSNIKSVSTTSQLL  
 210 220 230 240

Conf: }  
 Pred:   
 Pred: HHHCCCCCCCCCEEECCCCCCCCCCCCCCCCCCCCCHHHHHH  
 AA: LGRMDGPRRPVKYEEDVNLGSGTRAVASCAEAPNMKIIGR  
 250 260 270 280

Conf: }  
 Pred:   
 Pred: HHHHHHHHCCCCCCCCCCCCCEEEEEECCCCCCCC  
 AA: RIERIRNEHAEATWFLDENHRYRTWAYHGSYEAPTQGSASS  
 290 300 310 320

Conf: }  
 Pred: 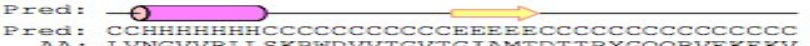  
 Pred: CCHHHHHHHHCCCCCCCCCEEEEEECCCCCCCCCCCCCCCC  
 AA: LVNGVVRLLSKPVDVVTGVTGIAMTDITPYGQQRVFKKV  
 330 340 350 360

Conf: }  
 Pred: 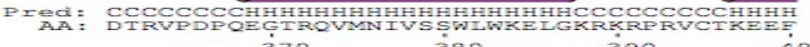  
 Pred: CCCCCCHHHHHHHHHHHHHHHHHHHHCCCCCCCCCHHHH  
 AA: DTRVDPDPOEGTRQVMNIVSSWLWKELGKRKRPRVCTKEEF  
 370 380 390 400

Conf: }  
 Pred: 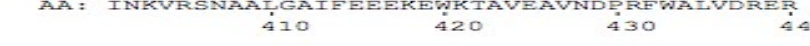  
 Pred: HHCCCCCCCCCHHHHHHHHHHHHHHHHHHHHCCCCCHHHHHH  
 AA: INKVRSNAAALGAIFEEKEWKTAVEAVNDERFWALVDRER  
 410 420 430 440

Conf: }  
 Pred:   
 Pred: HHHCCCCCEEEEEECCCCCCCCCCCCCCCCCEEEEEECC  
 AA: EHHLRGECHSCVYNMMGKREKKQGEFGKAKGSRAIWMWL  
 450 460 470 480

Conf: }  
 Pred:   
 Pred: HHHHHHHHHHCCCCCCCCCCCCCCCCCCCCCCCCCHHHHHH  
 AA: GARFLEFEALGFLNEDHWMGRENSSGGGVEGLGLQRLGYIL  
 490 500 510 520

Conf: }  
 Pred:   
 Pred: HHHHHCCCCCEEEEEECCCCCCCCCCCCCHHHHHHHHHHHH  
 AA: EEMNRAPGGKMYADDTAGWDTRIKFDLENEALITNOMEET  
 530 540 550 560

Conf: }  
 Pred:   
 Pred: CCCCCCCCCCHHHHHHHHHHHHHHHHHHHHCCCCCHHHHCC  
 AA: GHRTLALAVIKYTYQNKVVQVLRPAEGGKTVMDIISRQDQ  
 570 580 590 600

**Figure S4:** NS5 PDB Coordinates

EXPDTA THEORETICAL MODEL, MODELLER 9.16 2016/03/10 11:01:45

|       |    |    |     |     |         |        |        |      |      |    |  |
|-------|----|----|-----|-----|---------|--------|--------|------|------|----|--|
| HELIX | 42 | 42 | LEU | 8   | GLN     | 18     | 1      |      |      | 11 |  |
| HELIX | 43 | 43 | ALA | 21  | LYS     | 28     | 1      |      |      | 8  |  |
| HELIX | 44 | 44 | GLU | 38  | ASP     | 46     | 1      |      |      | 9  |  |
| HELIX | 45 | 45 | GLY | 58  | GLU     | 66     | 1      |      |      | 9  |  |
| HELIX | 46 | 46 | GLY | 86  | THR     | 93     | 1      |      |      | 8  |  |
| HELIX | 47 | 47 | TRP | 121 | ILE     | 123    | 1      |      |      | 3  |  |
| HELIX | 48 | 48 | PRO | 154 | GLU     | 173    | 1      |      |      | 20 |  |
| HELIX | 49 | 49 | SER | 189 | HIS     | 202    | 1      |      |      | 14 |  |
| HELIX | 50 | 50 | ILE | 229 | ARG     | 243    | 1      |      |      | 15 |  |
| HELIX | 51 | 51 | MET | 275 | GLU     | 288    | 1      |      |      | 14 |  |
| HELIX | 52 | 52 | GLY | 324 | LEU     | 329    | 1      |      |      | 6  |  |
| HELIX | 53 | 53 | LYS | 331 | ASP     | 334    | 1      |      |      | 4  |  |
| HELIX | 54 | 54 | THR | 337 | GLY     | 341    | 1      |      |      | 5  |  |
| HELIX | 55 | 55 | PRO | 349 | VAL     | 360    | 1      |      |      | 12 |  |
| HELIX | 56 | 56 | GLU | 369 | LEU     | 386    | 1      |      |      | 18 |  |
| HELIX | 57 | 57 | LYS | 397 | VAL     | 404    | 1      |      |      | 8  |  |
| HELIX | 58 | 58 | ALA | 423 | ASN     | 428    | 1      |      |      | 6  |  |
| HELIX | 59 | 59 | PRO | 430 | ARG     | 445    | 1      |      |      | 16 |  |
| HELIX | 60 | 60 | LEU | 480 | GLU     | 495    | 1      |      |      | 16 |  |
| HELIX | 61 | 61 | ARG | 501 | SER     | 504    | 1      |      |      | 4  |  |
| HELIX | 62 | 62 | LEU | 513 | ARG     | 525    | 1      |      |      | 13 |  |
| HELIX | 63 | 63 | TRP | 539 | ARG     | 542    | 1      |      |      | 4  |  |
| HELIX | 64 | 64 | LYS | 545 | GLN     | 557    | 1      |      |      | 13 |  |
| HELIX | 65 | 65 | HIS | 562 | TYR     | 574    | 1      |      |      | 13 |  |
| HELIX | 66 | 66 | GLU | 586 | GLY     | 588    | 1      |      |      | 3  |  |
| HELIX | 67 | 67 | THR | 608 | GLU     | 628    | 1      |      |      | 21 |  |
| HELIX | 68 | 68 | MET | 633 | TRP     | 637    | 1      |      |      | 5  |  |
| HELIX | 69 | 69 | LYS | 644 | ARG     | 659    | 1      |      |      | 16 |  |
| HELIX | 70 | 70 | ASP | 674 | ALA     | 677    | 1      |      |      | 4  |  |
| HELIX | 71 | 71 | ARG | 681 | ASP     | 685    | 1      |      |      | 5  |  |
| HELIX | 72 | 72 | TRP | 705 | GLU     | 707    | 1      |      |      | 3  |  |
| HELIX | 73 | 73 | GLN | 733 | ALA     | 740    | 1      |      |      | 8  |  |
| HELIX | 74 | 74 | ILE | 750 | LEU     | 767    | 1      |      |      | 18 |  |
| HELIX | 75 | 75 | ARG | 772 | ALA     | 784    | 1      |      |      | 13 |  |
| HELIX | 76 | 76 | MET | 811 | GLU     | 821    | 1      |      |      | 11 |  |
| HELIX | 77 | 77 | TRP | 835 | ASP     | 837    | 1      |      |      | 3  |  |
| HELIX | 78 | 78 | LYS | 843 | TRP     | 848    | 1      |      |      | 6  |  |
| HELIX | 79 | 79 | ARG | 856 | GLU     | 863    | 1      |      |      | 8  |  |
| HELIX | 80 | 80 | ILE | 865 | ILE     | 876    | 1      |      |      | 12 |  |
| HELIX | 81 | 81 | LEU | 886 | THR     | 888    | 1      |      |      | 3  |  |
| HELIX | 82 | 82 | VAL | 890 | GLY     | 901    | 1      |      |      | 12 |  |
| SHEET | 19 | 19 | 1   | THR | 33      | VAL    | 35     | 0    |      |    |  |
| SHEET | 20 | 20 | 1   | GLY | 75      | LEU    | 80     | 0    |      |    |  |
| SHEET | 21 | 21 | 1   | VAL | 97      | THR    | 104    | 0    |      |    |  |
| SHEET | 22 | 22 | 1   | VAL | 124     | SER    | 128    | 0    |      |    |  |
| SHEET | 23 | 23 | 1   | THR | 142     | CYS    | 145    | 0    |      |    |  |
| SHEET | 24 | 24 | 1   | ALA | 178     | VAL    | 183    | 0    |      |    |  |
| SHEET | 25 | 25 | 1   | GLY | 205     | VAL    | 207    | 0    |      |    |  |
| SHEET | 26 | 26 | 1   | MET | 219     | VAL    | 222    | 0    |      |    |  |
| SHEET | 27 | 27 | 1   | LYS | 252     | GLU    | 254    | 0    |      |    |  |
| SHEET | 28 | 28 | 1   | ALA | 305     | GLU    | 311    | 0    |      |    |  |
| SHEET | 29 | 29 | 1   | TYR | 453     | GLY    | 457    | 0    |      |    |  |
| SHEET | 30 | 30 | 1   | ALA | 474     | TYR    | 477    | 0    |      |    |  |
| SHEET | 31 | 31 | 1   | LYS | 577     | PRO    | 584    | 0    |      |    |  |
| SHEET | 32 | 32 | 1   | THR | 590     | ARG    | 597    | 0    |      |    |  |
| SHEET | 33 | 33 | 1   | MET | 660     | SER    | 663    | 0    |      |    |  |
| SHEET | 34 | 34 | 1   | ASP | 666     | VAL    | 669    | 0    |      |    |  |
| SHEET | 35 | 35 | 1   | HIS | 714     | TYR    | 719    | 0    |      |    |  |
| SHEET | 36 | 36 | 1   | SER | 725     | CYS    | 730    | 0    |      |    |  |
| ATOM  | 1  | N  | GLY | 1   | -83.992 | 86.689 | 12.072 | 1.00 | 9.55 | N  |  |
| ATOM  | 2  | CA | GLY | 1   | -82.513 | 86.704 | 12.147 | 1.00 | 9.55 | C  |  |
| ATOM  | 3  | C  | GLY | 1   | -81.947 | 85.609 | 11.310 | 1.00 | 9.55 | C  |  |
| ATOM  | 4  | O  | GLY | 1   | -82.541 | 85.203 | 10.312 | 1.00 | 9.55 | O  |  |



|      |    |     |     |    |         |        |        |            |       |   |
|------|----|-----|-----|----|---------|--------|--------|------------|-------|---|
| ATOM | 5  | N   | GLY | 2  | -80.769 | 85.095 | 11.711 | 1.00       | 69.94 | N |
| ATOM | 6  | CA  | GLY | 2  | -80.144 | 84.038 | 10.974 | 1.00       | 69.94 | C |
| ATOM | 7  | C   | GLY | 2  | -79.156 | 84.655 | 10.040 | 1.00       | 69.94 | C |
| ATOM | 8  | O   | GLY | 2  | -79.069 | 85.876 | 9.923  | 1.00       | 69.94 | O |
| ATOM | 9  | N   | GLY | 3  | -78.375 | 83.802 | 9.350  | 1.00130.21 |       | N |
| ATOM | 10 | CA  | GLY | 3  | -77.394 | 84.285 | 8.426  | 1.00130.21 |       | C |
| ATOM | 11 | C   | GLY | 3  | -77.362 | 83.327 | 7.282  | 1.00130.21 |       | C |
| ATOM | 12 | O   | GLY | 3  | -77.800 | 82.184 | 7.405  | 1.00130.21 |       | O |
| ATOM | 13 | N   | THR | 4  | -76.822 | 83.774 | 6.132  | 1.00253.37 |       | N |
| ATOM | 14 | CA  | THR | 4  | -76.789 | 82.925 | 4.979  | 1.00253.37 |       | C |
| ATOM | 15 | CB  | THR | 4  | -77.302 | 83.589 | 3.734  | 1.00253.37 |       | C |
| ATOM | 16 | OG1 | THR | 4  | -77.413 | 82.643 | 2.682  | 1.00253.37 |       | O |
| ATOM | 17 | CG2 | THR | 4  | -76.331 | 84.715 | 3.340  | 1.00253.37 |       | C |
| ATOM | 18 | C   | THR | 4  | -75.369 | 82.549 | 4.724  | 1.00253.37 |       | C |
| ATOM | 19 | O   | THR | 4  | -74.452 | 83.340 | 4.938  | 1.00253.37 |       | O |
| ATOM | 20 | N   | GLY | 5  | -75.160 | 81.297 | 4.271  | 1.00       | 64.46 | N |
| ATOM | 21 | CA  | GLY | 5  | -73.844 | 80.825 | 4.001  | 1.00       | 64.46 | C |
| ATOM | 22 | C   | GLY | 5  | -73.270 | 81.609 | 2.873  | 1.00       | 64.46 | C |
| ATOM | 23 | O   | GLY | 5  | -73.770 | 81.565 | 1.750  | 1.00       | 64.46 | O |
| ATOM | 24 | N   | GLU | 6  | -72.188 | 82.359 | 3.153  | 1.00103.79 |       | N |
| ATOM | 25 | CA  | GLU | 6  | -71.558 | 83.112 | 2.115  | 1.00103.79 |       | C |
| ATOM | 26 | CB  | GLU | 6  | -70.532 | 84.134 | 2.608  | 1.00103.79 |       | C |
| ATOM | 27 | CG  | GLU | 6  | -70.003 | 84.975 | 1.448  | 1.00103.79 |       | C |
| ATOM | 28 | CD  | GLU | 6  | -71.197 | 85.721 | 0.870  | 1.00103.79 |       | C |
| ATOM | 29 | OE1 | GLU | 6  | -71.922 | 85.124 | 0.029  | 1.00103.79 |       | O |
| ATOM | 30 | OE2 | GLU | 6  | -71.406 | 86.897 | 1.271  | 1.00103.79 |       | O |
| ATOM | 31 | C   | GLU | 6  | -70.839 | 82.191 | 1.186  | 1.00103.79 |       | C |
| ATOM | 32 | O   | GLU | 6  | -70.882 | 82.367 | -0.031 | 1.00103.79 |       | O |
| ATOM | 33 | N   | THR | 7  | -70.167 | 81.166 | 1.743  | 1.00107.97 |       | N |
| ATOM | 34 | CA  | THR | 7  | -69.372 | 80.300 | 0.926  | 1.00107.97 |       | C |
| ATOM | 35 | CB  | THR | 7  | -68.520 | 79.344 | 1.712  | 1.00107.97 |       | C |
| ATOM | 36 | OG1 | THR | 7  | -67.622 | 78.660 | 0.853  | 1.00107.97 |       | O |
| ATOM | 37 | CG2 | THR | 7  | -69.428 | 78.329 | 2.414  | 1.00107.97 |       | C |
| ATOM | 38 | C   | THR | 7  | -70.279 | 79.500 | 0.056  | 1.00107.97 |       | C |
| ATOM | 39 | O   | THR | 7  | -71.474 | 79.374 | 0.313  | 1.00107.97 |       | O |
| ATOM | 40 | N   | LEU | 8  | -69.701 | 78.976 | -1.040 | 1.00101.76 |       | N |
| ATOM | 41 | CA  | LEU | 8  | -70.397 | 78.197 | -2.018 | 1.00101.76 |       | C |
| ATOM | 42 | CB  | LEU | 8  | -69.485 | 77.874 | -3.216 | 1.00101.76 |       | C |
| ATOM | 43 | CG  | LEU | 8  | -70.214 | 77.376 | -4.478 | 1.00101.76 |       | C |
| ATOM | 44 | CD1 | LEU | 8  | -71.007 | 76.087 | -4.226 | 1.00101.76 |       | C |
| ATOM | 45 | CD2 | LEU | 8  | -71.051 | 78.498 | -5.109 | 1.00101.76 |       | C |
| ATOM | 46 | C   | LEU | 8  | -70.798 | 76.908 | -1.361 | 1.00101.76 |       | C |
| ATOM | 47 | O   | LEU | 8  | -71.865 | 76.360 | -1.634 | 1.00101.76 |       | O |
| ATOM | 48 | N   | GLY | 9  | -69.924 | 76.385 | -0.478 | 1.00       | 30.11 | N |
| ATOM | 49 | CA  | GLY | 9  | -70.152 | 75.135 | 0.191  | 1.00       | 30.11 | C |
| ATOM | 50 | C   | GLY | 9  | -71.352 | 75.231 | 1.083  | 1.00       | 30.11 | C |
| ATOM | 51 | O   | GLY | 9  | -72.140 | 74.292 | 1.178  | 1.00       | 30.11 | O |
| ATOM | 52 | N   | GLU | 10 | -71.514 | 76.373 | 1.775  | 1.00       | 60.87 | N |
| ATOM | 53 | CA  | GLU | 10 | -72.602 | 76.556 | 2.696  | 1.00       | 60.87 | C |
| ATOM | 54 | CB  | GLU | 10 | -72.531 | 77.911 | 3.431  | 1.00       | 60.87 | C |
| ATOM | 55 | CG  | GLU | 10 | -71.448 | 77.947 | 4.518  | 1.00       | 60.87 | C |
| ATOM | 56 | CD  | GLU | 10 | -71.249 | 79.386 | 4.979  | 1.00       | 60.87 | C |
| ATOM | 57 | OE1 | GLU | 10 | -70.938 | 80.250 | 4.115  | 1.00       | 60.87 | O |
| ATOM | 58 | OE2 | GLU | 10 | -71.400 | 79.639 | 6.204  | 1.00       | 60.87 | O |
| ATOM | 59 | C   | GLU | 10 | -73.896 | 76.479 | 1.946  | 1.00       | 60.87 | C |
| ATOM | 60 | O   | GLU | 10 | -74.889 | 75.966 | 2.457  | 1.00       | 60.87 | O |
| ATOM | 61 | N   | LYS | 11 | -73.915 | 77.003 | 0.708  | 1.00       | 51.21 | N |
| ATOM | 62 | CA  | LYS | 11 | -75.091 | 76.999 | -0.115 | 1.00       | 51.21 | C |
| ATOM | 63 | CB  | LYS | 11 | -74.855 | 77.780 | -1.423 | 1.00       | 51.21 | C |
| ATOM | 64 | CG  | LYS | 11 | -74.566 | 79.267 | -1.176 | 1.00       | 51.21 | C |
| ATOM | 65 | CD  | LYS | 11 | -73.970 | 80.015 | -2.373 | 1.00       | 51.21 | C |
| ATOM | 66 | CE  | LYS | 11 | -73.766 | 81.511 | -2.108 | 1.00       | 51.21 | C |
| ATOM | 67 | NZ  | LYS | 11 | -73.106 | 82.157 | -3.265 | 1.00       | 51.21 | N |
| ATOM | 68 | C   | LYS | 11 | -75.453 | 75.577 | -0.437 | 1.00       | 51.21 | C |
| ATOM | 69 | O   | LYS | 11 | -76.628 | 75.213 | -0.479 | 1.00       | 51.21 | O |
| ATOM | 70 | N   | TRP | 12 | -74.435 | 74.732 | -0.684 | 1.00       | 84.98 | N |

|      |     |     |     |    |         |        |        |      |        |   |
|------|-----|-----|-----|----|---------|--------|--------|------|--------|---|
| ATOM | 71  | CA  | TRP | 12 | -74.629 | 73.347 | -1.019 | 1.00 | 84.98  | C |
| ATOM | 72  | CB  | TRP | 12 | -73.305 | 72.638 | -1.339 | 1.00 | 84.98  | C |
| ATOM | 73  | CG  | TRP | 12 | -73.429 | 71.139 | -1.468 | 1.00 | 84.98  | C |
| ATOM | 74  | CD2 | TRP | 12 | -72.904 | 70.211 | -0.505 | 1.00 | 84.98  | C |
| ATOM | 75  | CD1 | TRP | 12 | -73.999 | 70.392 | -2.456 | 1.00 | 84.98  | C |
| ATOM | 76  | NE1 | TRP | 12 | -73.869 | 69.055 | -2.164 | 1.00 | 84.98  | N |
| ATOM | 77  | CE2 | TRP | 12 | -73.194 | 68.928 | -0.968 | 1.00 | 84.98  | C |
| ATOM | 78  | CE3 | TRP | 12 | -72.230 | 70.411 | 0.669  | 1.00 | 84.98  | C |
| ATOM | 79  | CZ2 | TRP | 12 | -72.816 | 67.821 | -0.262 | 1.00 | 84.98  | C |
| ATOM | 80  | CZ3 | TRP | 12 | -71.853 | 69.293 | 1.378  | 1.00 | 84.98  | C |
| ATOM | 81  | CH2 | TRP | 12 | -72.139 | 68.023 | 0.921  | 1.00 | 84.98  | C |
| ATOM | 82  | C   | TRP | 12 | -75.250 | 72.612 | 0.126  | 1.00 | 84.98  | C |
| ATOM | 83  | O   | TRP | 12 | -76.164 | 71.812 | -0.068 | 1.00 | 84.98  | O |
| ATOM | 84  | N   | LYS | 13 | -74.754 | 72.855 | 1.353  | 1.00 | 130.72 | N |
| ATOM | 85  | CA  | LYS | 13 | -75.243 | 72.159 | 2.509  | 1.00 | 130.72 | C |
| ATOM | 86  | CB  | LYS | 13 | -74.501 | 72.498 | 3.810  | 1.00 | 130.72 | C |
| ATOM | 87  | CG  | LYS | 13 | -73.330 | 71.559 | 4.086  | 1.00 | 130.72 | C |
| ATOM | 88  | CD  | LYS | 13 | -73.790 | 70.109 | 4.258  | 1.00 | 130.72 | C |
| ATOM | 89  | CE  | LYS | 13 | -72.667 | 69.138 | 4.616  | 1.00 | 130.72 | C |
| ATOM | 90  | NZ  | LYS | 13 | -73.209 | 67.769 | 4.759  | 1.00 | 130.72 | N |
| ATOM | 91  | C   | LYS | 13 | -76.688 | 72.450 | 2.745  | 1.00 | 130.72 | C |
| ATOM | 92  | O   | LYS | 13 | -77.443 | 71.551 | 3.112  | 1.00 | 130.72 | O |
| ATOM | 93  | N   | ALA | 14 | -77.114 | 73.710 | 2.549  | 1.00 | 28.53  | N |
| ATOM | 94  | CA  | ALA | 14 | -78.478 | 74.058 | 2.819  | 1.00 | 28.53  | C |
| ATOM | 95  | CB  | ALA | 14 | -78.782 | 75.542 | 2.556  | 1.00 | 28.53  | C |
| ATOM | 96  | C   | ALA | 14 | -79.366 | 73.256 | 1.925  | 1.00 | 28.53  | C |
| ATOM | 97  | O   | ALA | 14 | -80.393 | 72.738 | 2.361  | 1.00 | 28.53  | O |
| ATOM | 98  | N   | ARG | 15 | -78.989 | 73.131 | 0.640  | 1.00 | 122.04 | N |
| ATOM | 99  | CA  | ARG | 15 | -79.798 | 72.396 | -0.288 | 1.00 | 122.04 | C |
| ATOM | 100 | CB  | ARG | 15 | -79.314 | 72.488 | -1.745 | 1.00 | 122.04 | C |
| ATOM | 101 | CG  | ARG | 15 | -79.554 | 73.858 | -2.382 | 1.00 | 122.04 | C |
| ATOM | 102 | CD  | ARG | 15 | -79.313 | 73.880 | -3.894 | 1.00 | 122.04 | C |
| ATOM | 103 | NE  | ARG | 15 | -80.527 | 73.320 | -4.557 | 1.00 | 122.04 | N |
| ATOM | 104 | CZ  | ARG | 15 | -81.566 | 74.143 | -4.885 | 1.00 | 122.04 | C |
| ATOM | 105 | NH1 | ARG | 15 | -81.497 | 75.475 | -4.593 | 1.00 | 122.04 | N |
| ATOM | 106 | NH2 | ARG | 15 | -82.668 | 73.639 | -5.513 | 1.00 | 122.04 | N |
| ATOM | 107 | C   | ARG | 15 | -79.814 | 70.945 | 0.094  | 1.00 | 122.04 | C |
| ATOM | 108 | O   | ARG | 15 | -80.836 | 70.275 | -0.038 | 1.00 | 122.04 | O |
| ATOM | 109 | N   | LEU | 16 | -78.672 | 70.423 | 0.574  | 1.00 | 134.64 | N |
| ATOM | 110 | CA  | LEU | 16 | -78.528 | 69.028 | 0.892  | 1.00 | 134.64 | C |
| ATOM | 111 | CB  | LEU | 16 | -77.106 | 68.714 | 1.396  | 1.00 | 134.64 | C |
| ATOM | 112 | CG  | LEU | 16 | -76.693 | 67.227 | 1.372  | 1.00 | 134.64 | C |
| ATOM | 113 | CD1 | LEU | 16 | -77.716 | 66.314 | 2.051  | 1.00 | 134.64 | C |
| ATOM | 114 | CD2 | LEU | 16 | -76.313 | 66.779 | -0.045 | 1.00 | 134.64 | C |
| ATOM | 115 | C   | LEU | 16 | -79.470 | 68.683 | 2.012  | 1.00 | 134.64 | C |
| ATOM | 116 | O   | LEU | 16 | -80.144 | 67.655 | 1.982  | 1.00 | 134.64 | O |
| ATOM | 117 | N   | ASN | 17 | -79.542 | 69.562 | 3.028  | 1.00 | 52.32  | N |
| ATOM | 118 | CA  | ASN | 17 | -80.320 | 69.349 | 4.219  | 1.00 | 52.32  | C |
| ATOM | 119 | CB  | ASN | 17 | -80.112 | 70.461 | 5.264  | 1.00 | 52.32  | C |
| ATOM | 120 | CG  | ASN | 17 | -78.671 | 70.397 | 5.757  | 1.00 | 52.32  | C |
| ATOM | 121 | OD1 | ASN | 17 | -78.065 | 69.328 | 5.806  | 1.00 | 52.32  | O |
| ATOM | 122 | ND2 | ASN | 17 | -78.104 | 71.575 | 6.133  | 1.00 | 52.32  | N |
| ATOM | 123 | C   | ASN | 17 | -81.776 | 69.317 | 3.889  | 1.00 | 52.32  | C |
| ATOM | 124 | O   | ASN | 17 | -82.552 | 68.609 | 4.528  | 1.00 | 52.32  | O |
| ATOM | 125 | N   | GLN | 18 | -82.174 | 70.116 | 2.890  | 1.00 | 90.29  | N |
| ATOM | 126 | CA  | GLN | 18 | -83.535 | 70.286 | 2.479  | 1.00 | 90.29  | C |
| ATOM | 127 | CB  | GLN | 18 | -83.642 | 71.378 | 1.406  | 1.00 | 90.29  | C |
| ATOM | 128 | CG  | GLN | 18 | -85.065 | 71.818 | 1.084  | 1.00 | 90.29  | C |
| ATOM | 129 | CD  | GLN | 18 | -84.946 | 72.892 | 0.012  | 1.00 | 90.29  | C |
| ATOM | 130 | OE1 | GLN | 18 | -84.426 | 72.643 | -1.073 | 1.00 | 90.29  | O |
| ATOM | 131 | NE2 | GLN | 18 | -85.423 | 74.125 | 0.330  | 1.00 | 90.29  | N |
| ATOM | 132 | C   | GLN | 18 | -84.081 | 69.007 | 1.915  | 1.00 | 90.29  | C |
| ATOM | 133 | O   | GLN | 18 | -85.251 | 68.690 | 2.110  | 1.00 | 90.29  | O |
| ATOM | 134 | N   | MET | 19 | -83.232 | 68.230 | 1.219  | 1.00 | 77.92  | N |
| ATOM | 135 | CA  | MET | 19 | -83.637 | 67.056 | 0.494  | 1.00 | 77.92  | C |
| ATOM | 136 | CB  | MET | 19 | -82.454 | 66.263 | -0.086 | 1.00 | 77.92  | C |

|      |     |     |     |    |         |        |        |      |        |   |
|------|-----|-----|-----|----|---------|--------|--------|------|--------|---|
| ATOM | 137 | CG  | MET | 19 | -81.766 | 66.918 | -1.284 | 1.00 | 77.92  | C |
| ATOM | 138 | SD  | MET | 19 | -80.304 | 66.007 | -1.864 | 1.00 | 77.92  | S |
| ATOM | 139 | CE  | MET | 19 | -80.406 | 66.627 | -3.567 | 1.00 | 77.92  | C |
| ATOM | 140 | C   | MET | 19 | -84.394 | 66.086 | 1.338  | 1.00 | 77.92  | C |
| ATOM | 141 | O   | MET | 19 | -84.107 | 65.879 | 2.515  | 1.00 | 77.92  | O |
| ATOM | 142 | N   | SER | 20 | -85.410 | 65.461 | 0.708  | 1.00 | 39.63  | N |
| ATOM | 143 | CA  | SER | 20 | -86.177 | 64.431 | 1.333  | 1.00 | 39.63  | C |
| ATOM | 144 | CB  | SER | 20 | -87.536 | 64.173 | 0.656  | 1.00 | 39.63  | C |
| ATOM | 145 | OG  | SER | 20 | -87.343 | 63.748 | -0.684 | 1.00 | 39.63  | O |
| ATOM | 146 | C   | SER | 20 | -85.352 | 63.194 | 1.212  | 1.00 | 39.63  | C |
| ATOM | 147 | O   | SER | 20 | -84.344 | 63.171 | 0.508  | 1.00 | 39.63  | O |
| ATOM | 148 | N   | ALA | 21 | -85.765 | 62.122 | 1.905  | 1.00 | 29.46  | N |
| ATOM | 149 | CA  | ALA | 21 | -84.985 | 60.925 | 1.901  | 1.00 | 29.46  | C |
| ATOM | 150 | CB  | ALA | 21 | -85.598 | 59.810 | 2.766  | 1.00 | 29.46  | C |
| ATOM | 151 | C   | ALA | 21 | -84.883 | 60.403 | 0.504  | 1.00 | 29.46  | C |
| ATOM | 152 | O   | ALA | 21 | -83.817 | 59.956 | 0.086  | 1.00 | 29.46  | O |
| ATOM | 153 | N   | LEU | 22 | -85.987 | 60.444 | -0.268 | 1.00 | 69.04  | N |
| ATOM | 154 | CA  | LEU | 22 | -85.947 | 59.868 | -1.581 | 1.00 | 69.04  | C |
| ATOM | 155 | CB  | LEU | 22 | -87.327 | 59.859 | -2.280 | 1.00 | 69.04  | C |
| ATOM | 156 | CG  | LEU | 22 | -87.426 | 59.078 | -3.619 | 1.00 | 69.04  | C |
| ATOM | 157 | CD1 | LEU | 22 | -88.883 | 59.033 | -4.104 | 1.00 | 69.04  | C |
| ATOM | 158 | CD2 | LEU | 22 | -86.505 | 59.618 | -4.728 | 1.00 | 69.04  | C |
| ATOM | 159 | C   | LEU | 22 | -84.977 | 60.619 | -2.440 | 1.00 | 69.04  | C |
| ATOM | 160 | O   | LEU | 22 | -84.167 | 60.004 | -3.135 | 1.00 | 69.04  | O |
| ATOM | 161 | N   | GLU | 23 | -85.022 | 61.965 | -2.433 | 1.00 | 121.69 | N |
| ATOM | 162 | CA  | GLU | 23 | -84.153 | 62.675 | -3.326 | 1.00 | 121.69 | C |
| ATOM | 163 | CB  | GLU | 23 | -84.500 | 64.161 | -3.561 | 1.00 | 121.69 | C |
| ATOM | 164 | CG  | GLU | 23 | -84.377 | 65.116 | -2.377 | 1.00 | 121.69 | C |
| ATOM | 165 | CD  | GLU | 23 | -84.717 | 66.499 | -2.923 | 1.00 | 121.69 | C |
| ATOM | 166 | OE1 | GLU | 23 | -85.099 | 66.577 | -4.122 | 1.00 | 121.69 | O |
| ATOM | 167 | OE2 | GLU | 23 | -84.598 | 67.494 | -2.158 | 1.00 | 121.69 | O |
| ATOM | 168 | C   | GLU | 23 | -82.724 | 62.536 | -2.901 | 1.00 | 121.69 | C |
| ATOM | 169 | O   | GLU | 23 | -81.826 | 62.514 | -3.741 | 1.00 | 121.69 | O |
| ATOM | 170 | N   | PHE | 24 | -82.469 | 62.429 | -1.583 | 1.00 | 106.64 | N |
| ATOM | 171 | CA  | PHE | 24 | -81.125 | 62.327 | -1.086 | 1.00 | 106.64 | C |
| ATOM | 172 | CB  | PHE | 24 | -81.050 | 62.241 | 0.450  | 1.00 | 106.64 | C |
| ATOM | 173 | CG  | PHE | 24 | -79.628 | 61.981 | 0.824  | 1.00 | 106.64 | C |
| ATOM | 174 | CD1 | PHE | 24 | -78.657 | 62.934 | 0.620  | 1.00 | 106.64 | C |
| ATOM | 175 | CD2 | PHE | 24 | -79.268 | 60.788 | 1.406  | 1.00 | 106.64 | C |
| ATOM | 176 | CE1 | PHE | 24 | -77.350 | 62.690 | 0.971  | 1.00 | 106.64 | C |
| ATOM | 177 | CE2 | PHE | 24 | -77.963 | 60.539 | 1.761  | 1.00 | 106.64 | C |
| ATOM | 178 | CZ  | PHE | 24 | -76.997 | 61.491 | 1.541  | 1.00 | 106.64 | C |
| ATOM | 179 | C   | PHE | 24 | -80.471 | 61.108 | -1.655 | 1.00 | 106.64 | C |
| ATOM | 180 | O   | PHE | 24 | -79.311 | 61.149 | -2.060 | 1.00 | 106.64 | O |
| ATOM | 181 | N   | TYR | 25 | -81.205 | 59.987 | -1.702 | 1.00 | 197.52 | N |
| ATOM | 182 | CA  | TYR | 25 | -80.678 | 58.748 | -2.188 | 1.00 | 197.52 | C |
| ATOM | 183 | CB  | TYR | 25 | -81.680 | 57.596 | -2.052 | 1.00 | 197.52 | C |
| ATOM | 184 | CG  | TYR | 25 | -81.179 | 56.547 | -2.971 | 1.00 | 197.52 | C |
| ATOM | 185 | CD1 | TYR | 25 | -80.099 | 55.763 | -2.638 | 1.00 | 197.52 | C |
| ATOM | 186 | CD2 | TYR | 25 | -81.800 | 56.363 | -4.184 | 1.00 | 197.52 | C |
| ATOM | 187 | CE1 | TYR | 25 | -79.650 | 54.800 | -3.509 | 1.00 | 197.52 | C |
| ATOM | 188 | CE2 | TYR | 25 | -81.355 | 55.402 | -5.057 | 1.00 | 197.52 | C |
| ATOM | 189 | CZ  | TYR | 25 | -80.277 | 54.619 | -4.720 | 1.00 | 197.52 | C |
| ATOM | 190 | OH  | TYR | 25 | -79.818 | 53.632 | -5.617 | 1.00 | 197.52 | O |
| ATOM | 191 | C   | TYR | 25 | -80.297 | 58.840 | -3.632 | 1.00 | 197.52 | C |
| ATOM | 192 | O   | TYR | 25 | -79.285 | 58.275 | -4.040 | 1.00 | 197.52 | O |
| ATOM | 193 | N   | SER | 26 | -81.120 | 59.501 | -4.463 | 1.00 | 115.62 | N |
| ATOM | 194 | CA  | SER | 26 | -80.822 | 59.570 | -5.866 | 1.00 | 115.62 | C |
| ATOM | 195 | CB  | SER | 26 | -81.958 | 60.219 | -6.674 | 1.00 | 115.62 | C |
| ATOM | 196 | OG  | SER | 26 | -83.145 | 59.449 | -6.556 | 1.00 | 115.62 | O |
| ATOM | 197 | C   | SER | 26 | -79.600 | 60.408 | -6.076 | 1.00 | 115.62 | C |
| ATOM | 198 | O   | SER | 26 | -78.725 | 60.068 | -6.872 | 1.00 | 115.62 | O |
| ATOM | 199 | N   | TYR | 27 | -79.528 | 61.532 | -5.342 | 1.00 | 127.21 | N |
| ATOM | 200 | CA  | TYR | 27 | -78.514 | 62.539 | -5.449 | 1.00 | 127.21 | C |
| ATOM | 201 | CB  | TYR | 27 | -78.883 | 63.753 | -4.572 | 1.00 | 127.21 | C |
| ATOM | 202 | CG  | TYR | 27 | -77.811 | 64.785 | -4.591 | 1.00 | 127.21 | C |

|      |     |         |    |         |        |         |            |   |
|------|-----|---------|----|---------|--------|---------|------------|---|
| ATOM | 203 | CD1 TYR | 27 | -77.571 | 65.538 | -5.716  | 1.00127.21 | C |
| ATOM | 204 | CD2 TYR | 27 | -77.071 | 65.027 | -3.454  | 1.00127.21 | C |
| ATOM | 205 | CE1 TYR | 27 | -76.587 | 66.499 | -5.716  | 1.00127.21 | C |
| ATOM | 206 | CE2 TYR | 27 | -76.088 | 65.986 | -3.447  | 1.00127.21 | C |
| ATOM | 207 | CZ TYR  | 27 | -75.844 | 66.724 | -4.581  | 1.00127.21 | C |
| ATOM | 208 | OH TYR  | 27 | -74.836 | 67.711 | -4.581  | 1.00127.21 | O |
| ATOM | 209 | C TYR   | 27 | -77.178 | 62.017 | -5.031  | 1.00127.21 | C |
| ATOM | 210 | O TYR   | 27 | -76.157 | 62.336 | -5.637  | 1.00127.21 | O |
| ATOM | 211 | N LYS   | 28 | -77.136 | 61.191 | -3.977  | 1.00167.58 | N |
| ATOM | 212 | CA LYS  | 28 | -75.847 | 60.795 | -3.490  | 1.00167.58 | C |
| ATOM | 213 | CB LYS  | 28 | -75.890 | 59.962 | -2.193  | 1.00167.58 | C |
| ATOM | 214 | CG LYS  | 28 | -76.386 | 58.524 | -2.320  | 1.00167.58 | C |
| ATOM | 215 | CD LYS  | 28 | -76.104 | 57.705 | -1.058  | 1.00167.58 | C |
| ATOM | 216 | CE LYS  | 28 | -76.509 | 56.235 | -1.168  | 1.00167.58 | C |
| ATOM | 217 | NZ LYS  | 28 | -76.094 | 55.506 | 0.051   | 1.00167.58 | N |
| ATOM | 218 | C LYS   | 28 | -75.058 | 60.055 | -4.541  | 1.00167.58 | C |
| ATOM | 219 | O LYS   | 28 | -73.858 | 60.281 | -4.675  | 1.00167.58 | O |
| ATOM | 220 | N LYS   | 29 | -75.704 | 59.128 | -5.274  | 1.00182.06 | N |
| ATOM | 221 | CA LYS  | 29 | -75.154 | 58.309 | -6.334  | 1.00182.06 | C |
| ATOM | 222 | CB LYS  | 29 | -75.964 | 57.032 | -6.603  | 1.00182.06 | C |
| ATOM | 223 | CG LYS  | 29 | -75.766 | 55.950 | -5.540  | 1.00182.06 | C |
| ATOM | 224 | CD LYS  | 29 | -76.783 | 54.813 | -5.631  | 1.00182.06 | C |
| ATOM | 225 | CE LYS  | 29 | -76.442 | 53.603 | -4.759  | 1.00182.06 | C |
| ATOM | 226 | NZ LYS  | 29 | -75.410 | 52.776 | -5.424  | 1.00182.06 | N |
| ATOM | 227 | C LYS   | 29 | -75.032 | 59.036 | -7.648  | 1.00182.06 | C |
| ATOM | 228 | O LYS   | 29 | -74.527 | 58.484 | -8.620  | 1.00182.06 | O |
| ATOM | 229 | N SER   | 30 | -75.589 | 60.245 | -7.787  | 1.00185.44 | N |
| ATOM | 230 | CA SER  | 30 | -75.631 | 60.797 | -9.114  | 1.00185.44 | C |
| ATOM | 231 | CB SER  | 30 | -76.491 | 62.069 | -9.220  | 1.00185.44 | C |
| ATOM | 232 | OG SER  | 30 | -77.856 | 61.759 | -8.989  | 1.00185.44 | O |
| ATOM | 233 | C SER   | 30 | -74.291 | 61.138 | -9.696  | 1.00185.44 | C |
| ATOM | 234 | O SER   | 30 | -73.504 | 61.892 | -9.130  | 1.00185.44 | O |
| ATOM | 235 | N GLY   | 31 | -74.029 | 60.573 | -10.893 | 1.00112.70 | N |
| ATOM | 236 | CA GLY  | 31 | -72.893 | 60.885 | -11.716 | 1.00112.70 | C |
| ATOM | 237 | C GLY   | 31 | -71.590 | 60.532 | -11.065 | 1.00112.70 | C |
| ATOM | 238 | O GLY   | 31 | -70.539 | 60.961 | -11.543 | 1.00112.70 | O |
| ATOM | 239 | N ILE   | 32 | -71.574 | 59.698 | -10.010 | 1.00191.50 | N |
| ATOM | 240 | CA ILE  | 32 | -70.276 | 59.497 | -9.431  | 1.00191.50 | C |
| ATOM | 241 | CB ILE  | 32 | -70.177 | 59.473 | -7.922  | 1.00191.50 | C |
| ATOM | 242 | CG1 ILE | 32 | -70.680 | 58.162 | -7.288  | 1.00191.50 | C |
| ATOM | 243 | CG2 ILE | 32 | -70.894 | 60.727 | -7.398  | 1.00191.50 | C |
| ATOM | 244 | CD1 ILE | 32 | -72.138 | 57.814 | -7.506  | 1.00191.50 | C |
| ATOM | 245 | C ILE   | 32 | -69.816 | 58.160 | -9.896  | 1.00191.50 | C |
| ATOM | 246 | O ILE   | 32 | -70.530 | 57.475 | -10.624 | 1.00191.50 | O |
| ATOM | 247 | N THR   | 33 | -68.566 | 57.788 | -9.566  | 1.00148.21 | N |
| ATOM | 248 | CA THR  | 33 | -68.115 | 56.503 | -10.004 | 1.00148.21 | C |
| ATOM | 249 | CB THR  | 33 | -66.712 | 56.497 | -10.533 | 1.00148.21 | C |
| ATOM | 250 | OG1 THR | 33 | -66.507 | 55.341 | -11.329 | 1.00148.21 | O |
| ATOM | 251 | CG2 THR | 33 | -65.730 | 56.480 | -9.351  | 1.00148.21 | C |
| ATOM | 252 | C THR   | 33 | -68.175 | 55.579 | -8.831  | 1.00148.21 | C |
| ATOM | 253 | O THR   | 33 | -67.865 | 55.971 | -7.705  | 1.00148.21 | O |
| ATOM | 254 | N GLU   | 34 | -68.632 | 54.328 | -9.054  | 1.00110.07 | N |
| ATOM | 255 | CA GLU  | 34 | -68.651 | 53.398 | -7.964  | 1.00110.07 | C |
| ATOM | 256 | CB GLU  | 34 | -70.006 | 53.273 | -7.236  | 1.00110.07 | C |
| ATOM | 257 | CG GLU  | 34 | -71.152 | 52.670 | -8.045  | 1.00110.07 | C |
| ATOM | 258 | CD GLU  | 34 | -72.375 | 52.661 | -7.134  | 1.00110.07 | C |
| ATOM | 259 | OE1 GLU | 34 | -72.374 | 53.443 | -6.147  | 1.00110.07 | O |
| ATOM | 260 | OE2 GLU | 34 | -73.324 | 51.879 | -7.408  | 1.00110.07 | O |
| ATOM | 261 | C GLU   | 34 | -68.231 | 52.046 | -8.466  | 1.00110.07 | C |
| ATOM | 262 | O GLU   | 34 | -68.413 | 51.705 | -9.634  | 1.00110.07 | O |
| ATOM | 263 | N VAL   | 35 | -67.617 | 51.242 | -7.575  | 1.00133.52 | N |
| ATOM | 264 | CA VAL  | 35 | -67.137 | 49.933 | -7.926  | 1.00133.52 | C |
| ATOM | 265 | CB VAL  | 35 | -65.987 | 49.479 | -7.072  | 1.00133.52 | C |
| ATOM | 266 | CG1 VAL | 35 | -64.794 | 50.419 | -7.312  | 1.00133.52 | C |
| ATOM | 267 | CG2 VAL | 35 | -66.454 | 49.434 | -5.605  | 1.00133.52 | C |
| ATOM | 268 | C VAL   | 35 | -68.236 | 48.936 | -7.724  | 1.00133.52 | C |

|      |     |     |     |    |         |        |         |            |   |
|------|-----|-----|-----|----|---------|--------|---------|------------|---|
| ATOM | 269 | O   | VAL | 35 | -69.081 | 49.103 | -6.846  | 1.00133.52 | O |
| ATOM | 270 | N   | CYS | 36 | -68.249 | 47.862 | -8.549  | 1.00107.55 | N |
| ATOM | 271 | CA  | CYS | 36 | -69.254 | 46.841 | -8.410  | 1.00107.55 | C |
| ATOM | 272 | CB  | CYS | 36 | -69.395 | 45.908 | -9.623  | 1.00107.55 | C |
| ATOM | 273 | SG  | CYS | 36 | -70.279 | 46.700 | -10.992 | 1.00107.55 | S |
| ATOM | 274 | C   | CYS | 36 | -68.912 | 45.974 | -7.230  | 1.00107.55 | C |
| ATOM | 275 | O   | CYS | 36 | -67.960 | 45.196 | -7.251  | 1.00107.55 | O |
| ATOM | 276 | N   | ARG | 37 | -69.698 | 46.144 | -6.152  | 1.00317.69 | N |
| ATOM | 277 | CA  | ARG | 37 | -69.635 | 45.482 | -4.876  | 1.00317.69 | C |
| ATOM | 278 | CB  | ARG | 37 | -70.276 | 46.319 | -3.758  | 1.00317.69 | C |
| ATOM | 279 | CG  | ARG | 37 | -69.460 | 47.575 | -3.435  | 1.00317.69 | C |
| ATOM | 280 | CD  | ARG | 37 | -68.516 | 47.404 | -2.242  | 1.00317.69 | C |
| ATOM | 281 | NE  | ARG | 37 | -67.356 | 46.572 | -2.660  | 1.00317.69 | N |
| ATOM | 282 | CZ  | ARG | 37 | -66.642 | 45.897 | -1.712  | 1.00317.69 | C |
| ATOM | 283 | NH1 | ARG | 37 | -67.039 | 45.931 | -0.406  | 1.00317.69 | N |
| ATOM | 284 | NH2 | ARG | 37 | -65.532 | 45.188 | -2.067  | 1.00317.69 | N |
| ATOM | 285 | C   | ARG | 37 | -70.256 | 44.113 | -4.886  | 1.00317.69 | C |
| ATOM | 286 | O   | ARG | 37 | -70.087 | 43.355 | -3.934  | 1.00317.69 | O |
| ATOM | 287 | N   | GLU | 38 | -71.029 | 43.764 | -5.929  | 1.00 97.63 | N |
| ATOM | 288 | CA  | GLU | 38 | -71.833 | 42.571 | -5.883  | 1.00 97.63 | C |
| ATOM | 289 | CB  | GLU | 38 | -72.567 | 42.313 | -7.211  | 1.00 97.63 | C |
| ATOM | 290 | CG  | GLU | 38 | -73.694 | 43.316 | -7.480  | 1.00 97.63 | C |
| ATOM | 291 | CD  | GLU | 38 | -73.074 | 44.676 | -7.768  | 1.00 97.63 | C |
| ATOM | 292 | OE1 | GLU | 38 | -71.976 | 44.708 | -8.385  | 1.00 97.63 | O |
| ATOM | 293 | OE2 | GLU | 38 | -73.689 | 45.703 | -7.373  | 1.00 97.63 | O |
| ATOM | 294 | C   | GLU | 38 | -71.051 | 41.332 | -5.520  | 1.00 97.63 | C |
| ATOM | 295 | O   | GLU | 38 | -71.482 | 40.579 | -4.648  | 1.00 97.63 | O |
| ATOM | 296 | N   | GLU | 39 | -69.886 | 41.073 | -6.145  | 1.00 90.91 | N |
| ATOM | 297 | CA  | GLU | 39 | -69.149 | 39.871 | -5.840  | 1.00 90.91 | C |
| ATOM | 298 | CB  | GLU | 39 | -67.905 | 39.675 | -6.727  | 1.00 90.91 | C |
| ATOM | 299 | CG  | GLU | 39 | -68.222 | 39.300 | -8.174  | 1.00 90.91 | C |
| ATOM | 300 | CD  | GLU | 39 | -68.725 | 40.546 | -8.882  | 1.00 90.91 | C |
| ATOM | 301 | OE1 | GLU | 39 | -68.547 | 41.660 | -8.320  | 1.00 90.91 | O |
| ATOM | 302 | OE2 | GLU | 39 | -69.292 | 40.401 | -9.996  | 1.00 90.91 | O |
| ATOM | 303 | C   | GLU | 39 | -68.655 | 39.912 | -4.427  | 1.00 90.91 | C |
| ATOM | 304 | O   | GLU | 39 | -68.659 | 38.901 | -3.725  | 1.00 90.91 | O |
| ATOM | 305 | N   | ALA | 40 | -68.194 | 41.091 | -3.982  | 1.00 55.77 | N |
| ATOM | 306 | CA  | ALA | 40 | -67.633 | 41.241 | -2.674  | 1.00 55.77 | C |
| ATOM | 307 | CB  | ALA | 40 | -67.100 | 42.661 | -2.422  | 1.00 55.77 | C |
| ATOM | 308 | C   | ALA | 40 | -68.651 | 40.966 | -1.612  | 1.00 55.77 | C |
| ATOM | 309 | O   | ALA | 40 | -68.354 | 40.286 | -0.631  | 1.00 55.77 | O |
| ATOM | 310 | N   | ARG | 41 | -69.880 | 41.483 | -1.780  | 1.00 74.86 | N |
| ATOM | 311 | CA  | ARG | 41 | -70.890 | 41.349 | -0.766  | 1.00 74.86 | C |
| ATOM | 312 | CB  | ARG | 41 | -72.191 | 42.101 | -1.105  | 1.00 74.86 | C |
| ATOM | 313 | CG  | ARG | 41 | -72.043 | 43.626 | -1.132  | 1.00 74.86 | C |
| ATOM | 314 | CD  | ARG | 41 | -73.349 | 44.356 | -1.455  | 1.00 74.86 | C |
| ATOM | 315 | NE  | ARG | 41 | -73.069 | 45.820 | -1.448  | 1.00 74.86 | N |
| ATOM | 316 | CZ  | ARG | 41 | -73.774 | 46.648 | -2.275  | 1.00 74.86 | C |
| ATOM | 317 | NH1 | ARG | 41 | -74.738 | 46.130 | -3.092  | 1.00 74.86 | N |
| ATOM | 318 | NH2 | ARG | 41 | -73.513 | 47.987 | -2.293  | 1.00 74.86 | N |
| ATOM | 319 | C   | ARG | 41 | -71.244 | 39.908 | -0.583  | 1.00 74.86 | C |
| ATOM | 320 | O   | ARG | 41 | -71.431 | 39.451 | 0.543   | 1.00 74.86 | O |
| ATOM | 321 | N   | ARG | 42 | -71.363 | 39.152 | -1.690  | 1.00128.81 | N |
| ATOM | 322 | CA  | ARG | 42 | -71.728 | 37.770 | -1.579  | 1.00128.81 | C |
| ATOM | 323 | CB  | ARG | 42 | -71.975 | 37.076 | -2.929  | 1.00128.81 | C |
| ATOM | 324 | CG  | ARG | 42 | -70.738 | 37.007 | -3.820  | 1.00128.81 | C |
| ATOM | 325 | CD  | ARG | 42 | -71.002 | 36.403 | -5.200  | 1.00128.81 | C |
| ATOM | 326 | NE  | ARG | 42 | -71.479 | 35.003 | -5.015  | 1.00128.81 | N |
| ATOM | 327 | CZ  | ARG | 42 | -70.586 | 34.002 | -4.769  | 1.00128.81 | C |
| ATOM | 328 | NH1 | ARG | 42 | -69.275 | 34.300 | -4.535  | 1.00128.81 | N |
| ATOM | 329 | NH2 | ARG | 42 | -71.000 | 32.701 | -4.759  | 1.00128.81 | N |
| ATOM | 330 | C   | ARG | 42 | -70.618 | 37.039 | -0.893  | 1.00128.81 | C |
| ATOM | 331 | O   | ARG | 42 | -70.855 | 36.122 | -0.109  | 1.00128.81 | O |
| ATOM | 332 | N   | ALA | 43 | -69.363 | 37.424 | -1.177  | 1.00197.03 | N |
| ATOM | 333 | CA  | ALA | 43 | -68.240 | 36.746 | -0.597  | 1.00197.03 | C |
| ATOM | 334 | CB  | ALA | 43 | -66.893 | 37.326 | -1.053  | 1.00197.03 | C |

|      |     |     |     |    |         |        |        |            |   |
|------|-----|-----|-----|----|---------|--------|--------|------------|---|
| ATOM | 335 | C   | ALA | 43 | -68.301 | 36.887 | 0.891  | 1.00197.03 | C |
| ATOM | 336 | O   | ALA | 43 | -68.041 | 35.931 | 1.619  | 1.00197.03 | O |
| ATOM | 337 | N   | LEU | 44 | -68.661 | 38.090 | 1.377  | 1.00 70.27 | N |
| ATOM | 338 | CA  | LEU | 44 | -68.699 | 38.346 | 2.788  | 1.00 70.27 | C |
| ATOM | 339 | CB  | LEU | 44 | -69.079 | 39.802 | 3.114  | 1.00 70.27 | C |
| ATOM | 340 | CG  | LEU | 44 | -68.159 | 40.835 | 2.426  | 1.00 70.27 | C |
| ATOM | 341 | CD1 | LEU | 44 | -68.375 | 42.249 | 2.990  | 1.00 70.27 | C |
| ATOM | 342 | CD2 | LEU | 44 | -66.688 | 40.392 | 2.437  | 1.00 70.27 | C |
| ATOM | 343 | C   | LEU | 44 | -69.730 | 37.438 | 3.386  | 1.00 70.27 | C |
| ATOM | 344 | O   | LEU | 44 | -69.532 | 36.888 | 4.468  | 1.00 70.27 | O |
| ATOM | 345 | N   | LYS | 45 | -70.870 | 37.265 | 2.690  | 1.00 77.62 | N |
| ATOM | 346 | CA  | LYS | 45 | -71.930 | 36.418 | 3.163  | 1.00 77.62 | C |
| ATOM | 347 | CB  | LYS | 45 | -73.159 | 36.463 | 2.240  | 1.00 77.62 | C |
| ATOM | 348 | CG  | LYS | 45 | -73.853 | 37.825 | 2.242  | 1.00 77.62 | C |
| ATOM | 349 | CD  | LYS | 45 | -74.812 | 38.033 | 1.071  | 1.00 77.62 | C |
| ATOM | 350 | CE  | LYS | 45 | -75.527 | 39.385 | 1.117  | 1.00 77.62 | C |
| ATOM | 351 | NZ  | LYS | 45 | -76.190 | 39.654 | -0.178 | 1.00 77.62 | N |
| ATOM | 352 | C   | LYS | 45 | -71.457 | 34.996 | 3.195  | 1.00 77.62 | C |
| ATOM | 353 | O   | LYS | 45 | -71.713 | 34.261 | 4.148  | 1.00 77.62 | O |
| ATOM | 354 | N   | ASP | 46 | -70.740 | 34.594 | 2.133  | 1.00137.57 | N |
| ATOM | 355 | CA  | ASP | 46 | -70.241 | 33.271 | 1.893  | 1.00137.57 | C |
| ATOM | 356 | CB  | ASP | 46 | -69.643 | 33.174 | 0.477  | 1.00137.57 | C |
| ATOM | 357 | CG  | ASP | 46 | -69.788 | 31.755 | -0.045 | 1.00137.57 | C |
| ATOM | 358 | OD1 | ASP | 46 | -69.422 | 30.798 | 0.687  | 1.00137.57 | O |
| ATOM | 359 | OD2 | ASP | 46 | -70.270 | 31.612 | -1.202 | 1.00137.57 | O |
| ATOM | 360 | C   | ASP | 46 | -69.179 | 32.975 | 2.913  | 1.00137.57 | C |
| ATOM | 361 | O   | ASP | 46 | -68.902 | 31.818 | 3.223  | 1.00137.57 | O |
| ATOM | 362 | N   | GLY | 47 | -68.526 | 34.025 | 3.446  | 1.00210.82 | N |
| ATOM | 363 | CA  | GLY | 47 | -67.517 | 33.822 | 4.446  | 1.00210.82 | C |
| ATOM | 364 | C   | GLY | 47 | -66.198 | 33.605 | 3.776  | 1.00210.82 | C |
| ATOM | 365 | O   | GLY | 47 | -65.284 | 33.040 | 4.374  | 1.00210.82 | O |
| ATOM | 366 | N   | VAL | 48 | -66.052 | 34.043 | 2.508  | 1.00262.14 | N |
| ATOM | 367 | CA  | VAL | 48 | -64.786 | 33.824 | 1.871  | 1.00262.14 | C |
| ATOM | 368 | CB  | VAL | 48 | -64.857 | 33.642 | 0.384  | 1.00262.14 | C |
| ATOM | 369 | CG1 | VAL | 48 | -63.419 | 33.594 | -0.162 | 1.00262.14 | C |
| ATOM | 370 | CG2 | VAL | 48 | -65.661 | 32.364 | 0.088  | 1.00262.14 | C |
| ATOM | 371 | C   | VAL | 48 | -63.862 | 34.975 | 2.151  | 1.00262.14 | C |
| ATOM | 372 | O   | VAL | 48 | -64.024 | 36.074 | 1.624  | 1.00262.14 | O |
| ATOM | 373 | N   | ALA | 49 | -62.912 | 34.731 | 3.075  | 1.00124.49 | N |
| ATOM | 374 | CA  | ALA | 49 | -61.827 | 35.562 | 3.532  | 1.00124.49 | C |
| ATOM | 375 | CB  | ALA | 49 | -61.242 | 35.072 | 4.867  | 1.00124.49 | C |
| ATOM | 376 | C   | ALA | 49 | -60.693 | 35.615 | 2.550  | 1.00124.49 | C |
| ATOM | 377 | O   | ALA | 49 | -59.850 | 36.510 | 2.614  | 1.00124.49 | O |
| ATOM | 378 | N   | THR | 50 | -60.530 | 34.547 | 1.751  | 1.00338.58 | N |
| ATOM | 379 | CA  | THR | 50 | -59.555 | 34.549 | 0.700  | 1.00338.58 | C |
| ATOM | 380 | CB  | THR | 50 | -59.089 | 33.187 | 0.272  | 1.00338.58 | C |
| ATOM | 381 | OG1 | THR | 50 | -60.177 | 32.435 | -0.242 | 1.00338.58 | O |
| ATOM | 382 | CG2 | THR | 50 | -58.456 | 32.470 | 1.475  | 1.00338.58 | C |
| ATOM | 383 | C   | THR | 50 | -60.393 | 35.101 | -0.394 | 1.00338.58 | C |
| ATOM | 384 | O   | THR | 50 | -61.458 | 35.614 | -0.107 | 1.00338.58 | O |
| ATOM | 385 | N   | GLY | 51 | -59.989 | 35.057 | -1.660 | 1.00246.94 | N |
| ATOM | 386 | CA  | GLY | 51 | -60.846 | 35.542 | -2.699 | 1.00246.94 | C |
| ATOM | 387 | C   | GLY | 51 | -60.400 | 36.898 | -3.150 | 1.00246.94 | C |
| ATOM | 388 | O   | GLY | 51 | -60.657 | 37.278 | -4.291 | 1.00246.94 | O |
| ATOM | 389 | N   | GLY | 52 | -59.725 | 37.675 | -2.282 | 1.00738.32 | N |
| ATOM | 390 | CA  | GLY | 52 | -59.233 | 38.945 | -2.733 | 1.00738.32 | C |
| ATOM | 391 | C   | GLY | 52 | -60.262 | 40.043 | -2.618 | 1.00738.32 | C |
| ATOM | 392 | O   | GLY | 52 | -60.003 | 41.177 | -3.017 | 1.00738.32 | O |
| ATOM | 393 | N   | HIS | 53 | -61.454 | 39.766 | -2.061 | 1.00149.10 | N |
| ATOM | 394 | CA  | HIS | 53 | -62.482 | 40.780 | -2.013 | 1.00149.10 | C |
| ATOM | 395 | ND1 | HIS | 53 | -63.950 | 37.925 | -3.002 | 1.00149.10 | N |
| ATOM | 396 | CG  | HIS | 53 | -64.242 | 39.271 | -2.957 | 1.00149.10 | C |
| ATOM | 397 | CB  | HIS | 53 | -63.884 | 40.179 | -1.821 | 1.00149.10 | C |
| ATOM | 398 | NE2 | HIS | 53 | -64.951 | 38.422 | -4.924 | 1.00149.10 | N |
| ATOM | 399 | CD2 | HIS | 53 | -64.854 | 39.556 | -4.138 | 1.00149.10 | C |
| ATOM | 400 | CE1 | HIS | 53 | -64.395 | 37.468 | -4.199 | 1.00149.10 | C |

|      |     |     |     |    |         |        |        |            |   |
|------|-----|-----|-----|----|---------|--------|--------|------------|---|
| ATOM | 401 | C   | HIS | 53 | -62.248 | 41.735 | -0.874 | 1.00149.10 | C |
| ATOM | 402 | O   | HIS | 53 | -62.117 | 41.313 | 0.271  | 1.00149.10 | O |
| ATOM | 403 | N   | ALA | 54 | -62.250 | 43.061 | -1.158 | 1.00 73.72 | N |
| ATOM | 404 | CA  | ALA | 54 | -62.005 | 44.087 | -0.169 | 1.00 73.72 | C |
| ATOM | 405 | CB  | ALA | 54 | -61.746 | 45.472 | -0.784 | 1.00 73.72 | C |
| ATOM | 406 | C   | ALA | 54 | -63.177 | 44.222 | 0.764  | 1.00 73.72 | C |
| ATOM | 407 | O   | ALA | 54 | -64.324 | 44.005 | 0.383  | 1.00 73.72 | O |
| ATOM | 408 | N   | VAL | 55 | -62.892 | 44.602 | 2.030  | 1.00 86.56 | N |
| ATOM | 409 | CA  | VAL | 55 | -63.862 | 44.745 | 3.089  | 1.00 86.56 | C |
| ATOM | 410 | CB  | VAL | 55 | -63.246 | 44.922 | 4.449  | 1.00 86.56 | C |
| ATOM | 411 | CG1 | VAL | 55 | -62.473 | 43.642 | 4.806  | 1.00 86.56 | C |
| ATOM | 412 | CG2 | VAL | 55 | -62.370 | 46.186 | 4.446  | 1.00 86.56 | C |
| ATOM | 413 | C   | VAL | 55 | -64.773 | 45.903 | 2.833  | 1.00 86.56 | C |
| ATOM | 414 | O   | VAL | 55 | -65.912 | 45.911 | 3.300  | 1.00 86.56 | O |
| ATOM | 415 | N   | SER | 56 | -64.279 | 46.943 | 2.138  | 1.00 66.07 | N |
| ATOM | 416 | CA  | SER | 56 | -65.100 | 48.097 | 1.907  | 1.00 66.07 | C |
| ATOM | 417 | CB  | SER | 56 | -64.862 | 49.212 | 2.934  | 1.00 66.07 | C |
| ATOM | 418 | OG  | SER | 56 | -63.505 | 49.631 | 2.886  | 1.00 66.07 | O |
| ATOM | 419 | C   | SER | 56 | -64.727 | 48.686 | 0.586  | 1.00 66.07 | C |
| ATOM | 420 | O   | SER | 56 | -63.846 | 48.199 | -0.117 | 1.00 66.07 | O |
| ATOM | 421 | N   | ARG | 57 | -65.457 | 49.749 | 0.207  | 1.00236.82 | N |
| ATOM | 422 | CA  | ARG | 57 | -65.189 | 50.506 | -0.975 | 1.00236.82 | C |
| ATOM | 423 | CB  | ARG | 57 | -66.408 | 51.249 | -1.566 | 1.00236.82 | C |
| ATOM | 424 | CG  | ARG | 57 | -67.251 | 52.095 | -0.620 | 1.00236.82 | C |
| ATOM | 425 | CD  | ARG | 57 | -68.551 | 52.561 | -1.290 | 1.00236.82 | C |
| ATOM | 426 | NE  | ARG | 57 | -68.770 | 51.689 | -2.486 | 1.00236.82 | N |
| ATOM | 427 | CZ  | ARG | 57 | -70.014 | 51.232 | -2.822 | 1.00236.82 | C |
| ATOM | 428 | NH1 | ARG | 57 | -71.089 | 51.512 | -2.031 | 1.00236.82 | N |
| ATOM | 429 | NH2 | ARG | 57 | -70.187 | 50.487 | -3.953 | 1.00236.82 | N |
| ATOM | 430 | C   | ARG | 57 | -63.956 | 51.345 | -0.796 | 1.00236.82 | C |
| ATOM | 431 | O   | ARG | 57 | -63.423 | 51.887 | -1.762 | 1.00236.82 | O |
| ATOM | 432 | N   | GLY | 58 | -63.486 | 51.489 | 0.460  | 1.00 51.61 | N |
| ATOM | 433 | CA  | GLY | 58 | -62.332 | 52.278 | 0.812  | 1.00 51.61 | C |
| ATOM | 434 | C   | GLY | 58 | -61.101 | 51.785 | 0.097  | 1.00 51.61 | C |
| ATOM | 435 | O   | GLY | 58 | -60.194 | 52.570 | -0.175 | 1.00 51.61 | O |
| ATOM | 436 | N   | SER | 59 | -60.991 | 50.468 | -0.172 | 1.00 48.27 | N |
| ATOM | 437 | CA  | SER | 59 | -59.809 | 49.955 | -0.817 | 1.00 48.27 | C |
| ATOM | 438 | CB  | SER | 59 | -59.839 | 48.424 | -0.971 | 1.00 48.27 | C |
| ATOM | 439 | OG  | SER | 59 | -59.829 | 47.806 | 0.308  | 1.00 48.27 | O |
| ATOM | 440 | C   | SER | 59 | -59.661 | 50.548 | -2.189 | 1.00 48.27 | C |
| ATOM | 441 | O   | SER | 59 | -58.567 | 50.961 | -2.571 | 1.00 48.27 | O |
| ATOM | 442 | N   | ALA | 60 | -60.757 | 50.589 | -2.969 | 1.00139.28 | N |
| ATOM | 443 | CA  | ALA | 60 | -60.749 | 51.131 | -4.304 | 1.00139.28 | C |
| ATOM | 444 | CB  | ALA | 60 | -62.087 | 50.926 | -5.037 | 1.00139.28 | C |
| ATOM | 445 | C   | ALA | 60 | -60.473 | 52.599 | -4.238 | 1.00139.28 | C |
| ATOM | 446 | O   | ALA | 60 | -59.840 | 53.166 | -5.127 | 1.00139.28 | O |
| ATOM | 447 | N   | LYS | 61 | -60.990 | 53.265 | -3.192 | 1.00 94.37 | N |
| ATOM | 448 | CA  | LYS | 61 | -60.830 | 54.683 | -3.051 | 1.00 94.37 | C |
| ATOM | 449 | CB  | LYS | 61 | -61.567 | 55.185 | -1.805 | 1.00 94.37 | C |
| ATOM | 450 | CG  | LYS | 61 | -61.819 | 56.686 | -1.770 | 1.00 94.37 | C |
| ATOM | 451 | CD  | LYS | 61 | -62.840 | 57.050 | -0.696 | 1.00 94.37 | C |
| ATOM | 452 | CE  | LYS | 61 | -63.090 | 58.546 | -0.548 | 1.00 94.37 | C |
| ATOM | 453 | NZ  | LYS | 61 | -64.082 | 58.763 | 0.526  | 1.00 94.37 | N |
| ATOM | 454 | C   | LYS | 61 | -59.372 | 55.013 | -2.905 | 1.00 94.37 | C |
| ATOM | 455 | O   | LYS | 61 | -58.861 | 55.930 | -3.547 | 1.00 94.37 | O |
| ATOM | 456 | N   | ILE | 62 | -58.666 | 54.269 | -2.035 | 1.00120.55 | N |
| ATOM | 457 | CA  | ILE | 62 | -57.266 | 54.479 | -1.795 | 1.00120.55 | C |
| ATOM | 458 | CB  | ILE | 62 | -56.753 | 53.746 | -0.593 | 1.00120.55 | C |
| ATOM | 459 | CG1 | ILE | 62 | -57.408 | 54.330 | 0.669  | 1.00120.55 | C |
| ATOM | 460 | CG2 | ILE | 62 | -55.218 | 53.838 | -0.590 | 1.00120.55 | C |
| ATOM | 461 | CD1 | ILE | 62 | -57.152 | 55.831 | 0.824  | 1.00120.55 | C |
| ATOM | 462 | C   | ILE | 62 | -56.472 | 54.088 | -2.984 | 1.00120.55 | C |
| ATOM | 463 | O   | ILE | 62 | -55.457 | 54.716 | -3.292 | 1.00120.55 | O |
| ATOM | 464 | N   | ARG | 63 | -56.891 | 53.011 | -3.671 | 1.00580.63 | N |
| ATOM | 465 | CA  | ARG | 63 | -56.107 | 52.605 | -4.785 | 1.00580.63 | C |
| ATOM | 466 | CB  | ARG | 63 | -56.554 | 51.284 | -5.433 | 1.00580.63 | C |

|      |     |     |     |    |         |        |         |            |   |
|------|-----|-----|-----|----|---------|--------|---------|------------|---|
| ATOM | 467 | CG  | ARG | 63 | -57.979 | 51.248 | -5.958  | 1.00580.63 | C |
| ATOM | 468 | CD  | ARG | 63 | -58.246 | 49.986 | -6.775  | 1.00580.63 | C |
| ATOM | 469 | NE  | ARG | 63 | -59.425 | 50.271 | -7.632  | 1.00580.63 | N |
| ATOM | 470 | CZ  | ARG | 63 | -59.602 | 49.587 | -8.798  | 1.00580.63 | C |
| ATOM | 471 | NH1 | ARG | 63 | -58.730 | 48.598 | -9.153  | 1.00580.63 | N |
| ATOM | 472 | NH2 | ARG | 63 | -60.653 | 49.899 | -9.610  | 1.00580.63 | N |
| ATOM | 473 | C   | ARG | 63 | -56.111 | 53.730 | -5.742  | 1.00580.63 | C |
| ATOM | 474 | O   | ARG | 63 | -55.059 | 54.106 | -6.247  | 1.00580.63 | O |
| ATOM | 475 | N   | TRP | 64 | -57.266 | 54.376 | -5.934  | 1.00428.65 | N |
| ATOM | 476 | CA  | TRP | 64 | -57.384 | 55.367 | -6.944  | 1.00428.65 | C |
| ATOM | 477 | CB  | TRP | 64 | -58.811 | 55.902 | -7.049  | 1.00428.65 | C |
| ATOM | 478 | CG  | TRP | 64 | -59.004 | 56.268 | -8.476  | 1.00428.65 | C |
| ATOM | 479 | CD2 | TRP | 64 | -58.565 | 57.495 | -9.053  | 1.00428.65 | C |
| ATOM | 480 | CD1 | TRP | 64 | -59.467 | 55.492 | -9.497  | 1.00428.65 | C |
| ATOM | 481 | NE1 | TRP | 64 | -59.305 | 56.148 | -10.686 | 1.00428.65 | N |
| ATOM | 482 | CE2 | TRP | 64 | -58.753 | 57.384 | -10.425 | 1.00428.65 | C |
| ATOM | 483 | CE3 | TRP | 64 | -58.038 | 58.614 | -8.481  | 1.00428.65 | C |
| ATOM | 484 | CZ2 | TRP | 64 | -58.402 | 58.400 | -11.255 | 1.00428.65 | C |
| ATOM | 485 | CZ3 | TRP | 64 | -57.691 | 59.646 | -9.317  | 1.00428.65 | C |
| ATOM | 486 | CH2 | TRP | 64 | -57.869 | 59.532 | -10.679 | 1.00428.65 | C |
| ATOM | 487 | C   | TRP | 64 | -56.397 | 56.447 | -6.620  | 1.00428.65 | C |
| ATOM | 488 | O   | TRP | 64 | -55.951 | 57.180 | -7.482  | 1.00428.65 | O |
| ATOM | 489 | N   | LEU | 65 | -56.036 | 56.662 | -5.360  | 1.00225.68 | N |
| ATOM | 490 | CA  | LEU | 65 | -54.996 | 57.637 | -5.192  | 1.00225.68 | C |
| ATOM | 491 | CB  | LEU | 65 | -54.803 | 58.095 | -3.732  | 1.00225.68 | C |
| ATOM | 492 | CG  | LEU | 65 | -55.990 | 58.867 | -3.123  | 1.00225.68 | C |
| ATOM | 493 | CD1 | LEU | 65 | -57.169 | 57.950 | -2.763  | 1.00225.68 | C |
| ATOM | 494 | CD2 | LEU | 65 | -55.529 | 59.737 | -1.948  | 1.00225.68 | C |
| ATOM | 495 | C   | LEU | 65 | -53.635 | 57.147 | -5.664  | 1.00225.68 | C |
| ATOM | 496 | O   | LEU | 65 | -52.889 | 57.911 | -6.275  | 1.00225.68 | O |
| ATOM | 497 | N   | GLU | 66 | -53.258 | 55.879 | -5.367  | 1.00340.87 | N |
| ATOM | 498 | CA  | GLU | 66 | -51.915 | 55.366 | -5.582  | 1.00340.87 | C |
| ATOM | 499 | CB  | GLU | 66 | -51.707 | 54.016 | -4.870  | 1.00340.87 | C |
| ATOM | 500 | CG  | GLU | 66 | -50.287 | 53.462 | -4.978  | 1.00340.87 | C |
| ATOM | 501 | CD  | GLU | 66 | -50.198 | 52.650 | -6.260  | 1.00340.87 | C |
| ATOM | 502 | OE1 | GLU | 66 | -51.273 | 52.247 | -6.779  | 1.00340.87 | O |
| ATOM | 503 | OE2 | GLU | 66 | -49.054 | 52.413 | -6.732  | 1.00340.87 | O |
| ATOM | 504 | C   | GLU | 66 | -51.457 | 55.210 | -7.019  | 1.00340.87 | C |
| ATOM | 505 | O   | GLU | 66 | -50.396 | 55.714 | -7.383  | 1.00340.87 | O |
| ATOM | 506 | N   | GLU | 67 | -52.224 | 54.540 | -7.902  | 1.00999.99 | N |
| ATOM | 507 | CA  | GLU | 67 | -51.751 | 54.291 | -9.253  | 1.00999.99 | C |
| ATOM | 508 | CB  | GLU | 67 | -52.734 | 53.487 | -10.130 | 1.00999.99 | C |
| ATOM | 509 | CG  | GLU | 67 | -52.906 | 52.015 | -9.750  | 1.00999.99 | C |
| ATOM | 510 | CD  | GLU | 67 | -54.126 | 51.472 | -10.496 | 1.00999.99 | C |
| ATOM | 511 | OE1 | GLU | 67 | -54.873 | 52.301 | -11.081 | 1.00999.99 | O |
| ATOM | 512 | OE2 | GLU | 67 | -54.344 | 50.232 | -10.465 | 1.00999.99 | O |
| ATOM | 513 | C   | GLU | 67 | -51.572 | 55.592 | -9.943  | 1.00999.99 | C |
| ATOM | 514 | O   | GLU | 67 | -50.741 | 55.804 | -10.825 | 1.00999.99 | O |
| ATOM | 515 | N   | ARG | 68 | -52.466 | 56.465 | -9.535  | 1.00524.85 | N |
| ATOM | 516 | CA  | ARG | 68 | -52.778 | 57.768 | -9.939  | 1.00524.85 | C |
| ATOM | 517 | CB  | ARG | 68 | -54.262 | 57.732 | -9.512  | 1.00524.85 | C |
| ATOM | 518 | CG  | ARG | 68 | -54.969 | 56.298 | -9.827  | 1.00524.85 | C |
| ATOM | 519 | CD  | ARG | 68 | -54.823 | 55.064 | -8.794  | 1.00524.85 | C |
| ATOM | 520 | NE  | ARG | 68 | -55.825 | 53.867 | -8.901  | 1.00524.85 | N |
| ATOM | 521 | CZ  | ARG | 68 | -55.834 | 52.563 | -8.376  | 1.00524.85 | C |
| ATOM | 522 | NH1 | ARG | 68 | -54.854 | 51.915 | -7.657  | 1.00524.85 | N |
| ATOM | 523 | NH2 | ARG | 68 | -56.961 | 51.815 | -8.558  | 1.00524.85 | N |
| ATOM | 524 | C   | ARG | 68 | -51.678 | 58.698 | -9.411  | 1.00524.85 | C |
| ATOM | 525 | O   | ARG | 68 | -51.573 | 59.863 | -9.801  | 1.00524.85 | O |
| ATOM | 526 | N   | GLY | 69 | -50.846 | 58.212 | -8.454  | 1.00253.04 | N |
| ATOM | 527 | CA  | GLY | 69 | -49.604 | 58.862 | -8.080  | 1.00253.04 | C |
| ATOM | 528 | C   | GLY | 69 | -49.765 | 59.857 | -6.978  | 1.00253.04 | C |
| ATOM | 529 | O   | GLY | 69 | -48.798 | 60.513 | -6.591  | 1.00253.04 | O |
| ATOM | 530 | N   | TYR | 70 | -50.979 | 59.986 | -6.428  | 1.00133.65 | N |
| ATOM | 531 | CA  | TYR | 70 | -51.232 | 60.944 | -5.395  | 1.00133.65 | C |
| ATOM | 532 | CB  | TYR | 70 | -52.700 | 60.970 | -4.933  | 1.00133.65 | C |



|      |     |     |     |    |         |        |        |            |   |
|------|-----|-----|-----|----|---------|--------|--------|------------|---|
| ATOM | 533 | CG  | TYR | 70 | -53.576 | 61.387 | -6.063 | 1.00133.65 | C |
| ATOM | 534 | CD1 | TYR | 70 | -53.555 | 62.684 | -6.524 | 1.00133.65 | C |
| ATOM | 535 | CD2 | TYR | 70 | -54.441 | 60.486 | -6.641 | 1.00133.65 | C |
| ATOM | 536 | CE1 | TYR | 70 | -54.372 | 63.069 | -7.560 | 1.00133.65 | C |
| ATOM | 537 | CE2 | TYR | 70 | -55.259 | 60.866 | -7.678 | 1.00133.65 | C |
| ATOM | 538 | CZ  | TYR | 70 | -55.223 | 62.160 | -8.140 | 1.00133.65 | C |
| ATOM | 539 | OH  | TYR | 70 | -56.062 | 62.552 | -9.203 | 1.00133.65 | O |
| ATOM | 540 | C   | TYR | 70 | -50.429 | 60.612 | -4.169 | 1.00133.65 | C |
| ATOM | 541 | O   | TYR | 70 | -49.947 | 61.520 | -3.491 | 1.00133.65 | O |
| ATOM | 542 | N   | LEU | 71 | -50.319 | 59.314 | -3.804 | 1.00132.05 | N |
| ATOM | 543 | CA  | LEU | 71 | -49.579 | 58.937 | -2.625 | 1.00132.05 | C |
| ATOM | 544 | CB  | LEU | 71 | -50.505 | 58.845 | -1.387 | 1.00132.05 | C |
| ATOM | 545 | CG  | LEU | 71 | -49.852 | 58.595 | -0.007 | 1.00132.05 | C |
| ATOM | 546 | CD1 | LEU | 71 | -50.918 | 58.625 | 1.099  | 1.00132.05 | C |
| ATOM | 547 | CD2 | LEU | 71 | -49.045 | 57.291 | 0.052  | 1.00132.05 | C |
| ATOM | 548 | C   | LEU | 71 | -48.924 | 57.604 | -2.875 | 1.00132.05 | C |
| ATOM | 549 | O   | LEU | 71 | -49.504 | 56.737 | -3.527 | 1.00132.05 | O |
| ATOM | 550 | N   | GLN | 72 | -47.669 | 57.410 | -2.402 | 1.00140.84 | N |
| ATOM | 551 | CA  | GLN | 72 | -47.069 | 56.108 | -2.549 | 1.00140.84 | C |
| ATOM | 552 | CB  | GLN | 72 | -45.846 | 56.066 | -3.487 | 1.00140.84 | C |
| ATOM | 553 | CG  | GLN | 72 | -44.646 | 56.893 | -3.028 | 1.00140.84 | C |
| ATOM | 554 | CD  | GLN | 72 | -43.489 | 56.548 | -3.954 | 1.00140.84 | C |
| ATOM | 555 | OE1 | GLN | 72 | -42.945 | 57.409 | -4.644 | 1.00140.84 | O |
| ATOM | 556 | NE2 | GLN | 72 | -43.102 | 55.244 | -3.972 | 1.00140.84 | N |
| ATOM | 557 | C   | GLN | 72 | -46.659 | 55.622 | -1.186 | 1.00140.84 | C |
| ATOM | 558 | O   | GLN | 72 | -45.657 | 56.056 | -0.622 | 1.00140.84 | O |
| ATOM | 559 | N   | PRO | 73 | -47.396 | 54.679 | -0.662 | 1.00106.51 | N |
| ATOM | 560 | CA  | PRO | 73 | -47.159 | 54.210 | 0.681  | 1.00106.51 | C |
| ATOM | 561 | CD  | PRO | 73 | -48.778 | 54.488 | -1.071 | 1.00106.51 | C |
| ATOM | 562 | CB  | PRO | 73 | -48.355 | 53.325 | 1.026  | 1.00106.51 | C |
| ATOM | 563 | CG  | PRO | 73 | -49.491 | 53.894 | 0.157  | 1.00106.51 | C |
| ATOM | 564 | C   | PRO | 73 | -45.849 | 53.513 | 0.843  | 1.00106.51 | C |
| ATOM | 565 | O   | PRO | 73 | -45.473 | 52.746 | -0.039 | 1.00106.51 | O |
| ATOM | 566 | N   | TYR | 74 | -45.125 | 53.771 | 1.952  | 1.00141.17 | N |
| ATOM | 567 | CA  | TYR | 74 | -43.896 | 53.066 | 2.156  | 1.00141.17 | C |
| ATOM | 568 | CB  | TYR | 74 | -42.680 | 53.730 | 1.478  | 1.00141.17 | C |
| ATOM | 569 | CG  | TYR | 74 | -42.498 | 55.109 | 2.011  | 1.00141.17 | C |
| ATOM | 570 | CD1 | TYR | 74 | -43.338 | 56.125 | 1.619  | 1.00141.17 | C |
| ATOM | 571 | CD2 | TYR | 74 | -41.473 | 55.389 | 2.885  | 1.00141.17 | C |
| ATOM | 572 | CE1 | TYR | 74 | -43.167 | 57.401 | 2.102  | 1.00141.17 | C |
| ATOM | 573 | CE2 | TYR | 74 | -41.297 | 56.664 | 3.370  | 1.00141.17 | C |
| ATOM | 574 | CZ  | TYR | 74 | -42.146 | 57.671 | 2.980  | 1.00141.17 | C |
| ATOM | 575 | OH  | TYR | 74 | -41.968 | 58.979 | 3.478  | 1.00141.17 | O |
| ATOM | 576 | C   | TYR | 74 | -43.642 | 52.920 | 3.632  | 1.00141.17 | C |
| ATOM | 577 | O   | TYR | 74 | -44.184 | 53.663 | 4.448  | 1.00141.17 | O |
| ATOM | 578 | N   | GLY | 75 | -42.831 | 51.909 | 4.009  | 1.00 48.62 | N |
| ATOM | 579 | CA  | GLY | 75 | -42.393 | 51.681 | 5.364  | 1.00 48.62 | C |
| ATOM | 580 | C   | GLY | 75 | -43.542 | 51.380 | 6.281  | 1.00 48.62 | C |
| ATOM | 581 | O   | GLY | 75 | -44.428 | 50.587 | 5.969  | 1.00 48.62 | O |
| ATOM | 582 | N   | LYS | 76 | -43.515 | 51.996 | 7.483  | 1.00 85.83 | N |
| ATOM | 583 | CA  | LYS | 76 | -44.533 | 51.776 | 8.473  | 1.00 85.83 | C |
| ATOM | 584 | CB  | LYS | 76 | -44.074 | 52.186 | 9.882  | 1.00 85.83 | C |
| ATOM | 585 | CG  | LYS | 76 | -45.004 | 51.738 | 11.008 | 1.00 85.83 | C |
| ATOM | 586 | CD  | LYS | 76 | -44.431 | 52.007 | 12.400 | 1.00 85.83 | C |
| ATOM | 587 | CE  | LYS | 76 | -45.349 | 51.564 | 13.540 | 1.00 85.83 | C |
| ATOM | 588 | NZ  | LYS | 76 | -44.734 | 51.904 | 14.842 | 1.00 85.83 | N |
| ATOM | 589 | C   | LYS | 76 | -45.701 | 52.637 | 8.114  | 1.00 85.83 | C |
| ATOM | 590 | O   | LYS | 76 | -45.571 | 53.853 | 7.989  | 1.00 85.83 | O |
| ATOM | 591 | N   | VAL | 77 | -46.888 | 52.025 | 7.958  | 1.00 60.70 | N |
| ATOM | 592 | CA  | VAL | 77 | -48.049 | 52.776 | 7.577  | 1.00 60.70 | C |
| ATOM | 593 | CB  | VAL | 77 | -48.789 | 52.129 | 6.441  | 1.00 60.70 | C |
| ATOM | 594 | CG1 | VAL | 77 | -50.105 | 52.882 | 6.205  | 1.00 60.70 | C |
| ATOM | 595 | CG2 | VAL | 77 | -47.865 | 52.091 | 5.213  | 1.00 60.70 | C |
| ATOM | 596 | C   | VAL | 77 | -48.985 | 52.836 | 8.744  | 1.00 60.70 | C |
| ATOM | 597 | O   | VAL | 77 | -49.404 | 51.810 | 9.279  | 1.00 60.70 | O |
| ATOM | 598 | N   | VAL | 78 | -49.346 | 54.064 | 9.169  | 1.00115.35 | N |

|      |     |     |     |    |         |        |        |            |   |
|------|-----|-----|-----|----|---------|--------|--------|------------|---|
| ATOM | 599 | CA  | VAL | 78 | -50.269 | 54.195 | 10.260 | 1.00115.35 | C |
| ATOM | 600 | CB  | VAL | 78 | -49.847 | 55.183 | 11.303 | 1.00115.35 | C |
| ATOM | 601 | CG1 | VAL | 78 | -49.735 | 56.563 | 10.643 | 1.00115.35 | C |
| ATOM | 602 | CG2 | VAL | 78 | -50.857 | 55.130 | 12.463 | 1.00115.35 | C |
| ATOM | 603 | C   | VAL | 78 | -51.583 | 54.644 | 9.689  | 1.00115.35 | C |
| ATOM | 604 | O   | VAL | 78 | -51.646 | 55.605 | 8.923  | 1.00115.35 | O |
| ATOM | 605 | N   | ASP | 79 | -52.678 | 53.947 | 10.059 | 1.00 72.57 | N |
| ATOM | 606 | CA  | ASP | 79 | -53.968 | 54.232 | 9.492  | 1.00 72.57 | C |
| ATOM | 607 | CB  | ASP | 79 | -54.574 | 52.986 | 8.820  | 1.00 72.57 | C |
| ATOM | 608 | CG  | ASP | 79 | -55.838 | 53.365 | 8.065  | 1.00 72.57 | C |
| ATOM | 609 | OD1 | ASP | 79 | -56.164 | 54.581 | 8.024  | 1.00 72.57 | O |
| ATOM | 610 | OD2 | ASP | 79 | -56.495 | 52.439 | 7.522  | 1.00 72.57 | O |
| ATOM | 611 | C   | ASP | 79 | -54.914 | 54.657 | 10.580 | 1.00 72.57 | C |
| ATOM | 612 | O   | ASP | 79 | -55.521 | 53.818 | 11.247 | 1.00 72.57 | O |
| ATOM | 613 | N   | LEU | 80 | -55.079 | 55.984 | 10.776 | 1.00146.17 | N |
| ATOM | 614 | CA  | LEU | 80 | -55.977 | 56.459 | 11.796 | 1.00146.17 | C |
| ATOM | 615 | CB  | LEU | 80 | -55.833 | 57.957 | 12.141 | 1.00146.17 | C |
| ATOM | 616 | CG  | LEU | 80 | -54.483 | 58.405 | 12.737 | 1.00146.17 | C |
| ATOM | 617 | CD1 | LEU | 80 | -54.164 | 57.676 | 14.045 | 1.00146.17 | C |
| ATOM | 618 | CD2 | LEU | 80 | -53.345 | 58.337 | 11.716 | 1.00146.17 | C |
| ATOM | 619 | C   | LEU | 80 | -57.389 | 56.317 | 11.303 | 1.00146.17 | C |
| ATOM | 620 | O   | LEU | 80 | -57.725 | 56.791 | 10.218 | 1.00146.17 | O |
| ATOM | 621 | N   | GLY | 81 | -58.272 | 55.707 | 12.125 | 1.00 38.74 | N |
| ATOM | 622 | CA  | GLY | 81 | -59.652 | 55.545 | 11.746 | 1.00 38.74 | C |
| ATOM | 623 | C   | GLY | 81 | -59.767 | 54.538 | 10.637 | 1.00 38.74 | C |
| ATOM | 624 | O   | GLY | 81 | -60.371 | 54.807 | 9.600  | 1.00 38.74 | O |
| ATOM | 625 | N   | CYS | 82 | -59.179 | 53.344 | 10.839 | 1.00 57.31 | N |
| ATOM | 626 | CA  | CYS | 82 | -59.161 | 52.282 | 9.865  | 1.00 57.31 | C |
| ATOM | 627 | CB  | CYS | 82 | -58.287 | 51.088 | 10.295 | 1.00 57.31 | C |
| ATOM | 628 | SG  | CYS | 82 | -58.953 | 50.208 | 11.739 | 1.00 57.31 | S |
| ATOM | 629 | C   | CYS | 82 | -60.543 | 51.746 | 9.601  | 1.00 57.31 | C |
| ATOM | 630 | O   | CYS | 82 | -60.842 | 51.317 | 8.486  | 1.00 57.31 | O |
| ATOM | 631 | N   | GLY | 83 | -61.415 | 51.709 | 10.627 | 1.00 32.75 | N |
| ATOM | 632 | CA  | GLY | 83 | -62.748 | 51.205 | 10.429 | 1.00 32.75 | C |
| ATOM | 633 | C   | GLY | 83 | -62.671 | 49.739 | 10.119 | 1.00 32.75 | C |
| ATOM | 634 | O   | GLY | 83 | -62.082 | 48.960 | 10.865 | 1.00 32.75 | O |
| ATOM | 635 | N   | ARG | 84 | -63.308 | 49.321 | 9.008  | 1.00189.62 | N |
| ATOM | 636 | CA  | ARG | 84 | -63.292 | 47.941 | 8.612  | 1.00189.62 | C |
| ATOM | 637 | CB  | ARG | 84 | -64.379 | 47.550 | 7.593  | 1.00189.62 | C |
| ATOM | 638 | CG  | ARG | 84 | -64.465 | 48.379 | 6.320  | 1.00189.62 | C |
| ATOM | 639 | CD  | ARG | 84 | -65.678 | 47.976 | 5.478  | 1.00189.62 | C |
| ATOM | 640 | NE  | ARG | 84 | -66.890 | 48.113 | 6.333  | 1.00189.62 | N |
| ATOM | 641 | CZ  | ARG | 84 | -68.109 | 47.708 | 5.870  | 1.00189.62 | C |
| ATOM | 642 | NH1 | ARG | 84 | -68.223 | 47.167 | 4.621  | 1.00189.62 | N |
| ATOM | 643 | NH2 | ARG | 84 | -69.214 | 47.839 | 6.660  | 1.00189.62 | N |
| ATOM | 644 | C   | ARG | 84 | -61.908 | 47.551 | 8.190  | 1.00189.62 | C |
| ATOM | 645 | O   | ARG | 84 | -61.547 | 46.377 | 8.271  | 1.00189.62 | O |
| ATOM | 646 | N   | GLY | 85 | -61.085 | 48.524 | 7.739  | 1.00 51.92 | N |
| ATOM | 647 | CA  | GLY | 85 | -59.722 | 48.189 | 7.415  | 1.00 51.92 | C |
| ATOM | 648 | C   | GLY | 85 | -59.481 | 48.212 | 5.938  | 1.00 51.92 | C |
| ATOM | 649 | O   | GLY | 85 | -58.502 | 47.643 | 5.458  | 1.00 51.92 | O |
| ATOM | 650 | N   | GLY | 86 | -60.345 | 48.905 | 5.178  | 1.00 48.18 | N |
| ATOM | 651 | CA  | GLY | 86 | -60.215 | 48.910 | 3.751  | 1.00 48.18 | C |
| ATOM | 652 | C   | GLY | 86 | -58.883 | 49.455 | 3.302  | 1.00 48.18 | C |
| ATOM | 653 | O   | GLY | 86 | -58.293 | 48.923 | 2.363  | 1.00 48.18 | O |
| ATOM | 654 | N   | TRP | 87 | -58.395 | 50.555 | 3.911  | 1.00104.17 | N |
| ATOM | 655 | CA  | TRP | 87 | -57.149 | 51.152 | 3.495  | 1.00104.17 | C |
| ATOM | 656 | CB  | TRP | 87 | -56.958 | 52.568 | 4.085  | 1.00104.17 | C |
| ATOM | 657 | CG  | TRP | 87 | -58.047 | 53.547 | 3.679  | 1.00104.17 | C |
| ATOM | 658 | CD2 | TRP | 87 | -57.876 | 54.969 | 3.551  | 1.00104.17 | C |
| ATOM | 659 | CD1 | TRP | 87 | -59.348 | 53.289 | 3.353  | 1.00104.17 | C |
| ATOM | 660 | NE1 | TRP | 87 | -59.998 | 54.459 | 3.039  | 1.00104.17 | N |
| ATOM | 661 | CE2 | TRP | 87 | -59.104 | 55.501 | 3.153  | 1.00104.17 | C |
| ATOM | 662 | CE3 | TRP | 87 | -56.787 | 55.770 | 3.747  | 1.00104.17 | C |
| ATOM | 663 | CZ2 | TRP | 87 | -59.260 | 56.842 | 2.943  | 1.00104.17 | C |
| ATOM | 664 | CZ3 | TRP | 87 | -56.949 | 57.122 | 3.532  | 1.00104.17 | C |

|      |     |         |    |         |        |        |            |   |
|------|-----|---------|----|---------|--------|--------|------------|---|
| ATOM | 665 | CH2 TRP | 87 | -58.161 | 57.648 | 3.138  | 1.00104.17 | C |
| ATOM | 666 | C TRP   | 87 | -55.970 | 50.295 | 3.887  | 1.00104.17 | C |
| ATOM | 667 | O TRP   | 87 | -55.019 | 50.124 | 3.124  | 1.00104.17 | O |
| ATOM | 668 | N SER   | 88 | -56.006 | 49.723 | 5.104  | 1.00 54.67 | N |
| ATOM | 669 | CA SER  | 88 | -54.894 | 48.982 | 5.642  | 1.00 54.67 | C |
| ATOM | 670 | CB SER  | 88 | -55.168 | 48.468 | 7.067  | 1.00 54.67 | C |
| ATOM | 671 | OG SER  | 88 | -55.337 | 49.559 | 7.959  | 1.00 54.67 | O |
| ATOM | 672 | C SER   | 88 | -54.563 | 47.789 | 4.795  | 1.00 54.67 | C |
| ATOM | 673 | O SER   | 88 | -53.395 | 47.510 | 4.531  | 1.00 54.67 | O |
| ATOM | 674 | N TYR   | 89 | -55.587 | 47.041 | 4.353  | 1.00148.88 | N |
| ATOM | 675 | CA TYR  | 89 | -55.372 | 45.842 | 3.587  | 1.00148.88 | C |
| ATOM | 676 | CB TYR  | 89 | -56.640 | 44.988 | 3.431  | 1.00148.88 | C |
| ATOM | 677 | CG TYR  | 89 | -56.845 | 44.340 | 4.758  | 1.00148.88 | C |
| ATOM | 678 | CD1 TYR | 89 | -57.402 | 45.025 | 5.811  | 1.00148.88 | C |
| ATOM | 679 | CD2 TYR | 89 | -56.471 | 43.033 | 4.954  | 1.00148.88 | C |
| ATOM | 680 | CE1 TYR | 89 | -57.580 | 44.417 | 7.032  | 1.00148.88 | C |
| ATOM | 681 | CE2 TYR | 89 | -56.647 | 42.419 | 6.172  | 1.00148.88 | C |
| ATOM | 682 | CZ TYR  | 89 | -57.203 | 43.112 | 7.216  | 1.00148.88 | C |
| ATOM | 683 | OH TYR  | 89 | -57.385 | 42.485 | 8.468  | 1.00148.88 | O |
| ATOM | 684 | C TYR   | 89 | -54.793 | 46.140 | 2.238  | 1.00148.88 | C |
| ATOM | 685 | O TYR   | 89 | -54.019 | 45.353 | 1.698  | 1.00148.88 | O |
| ATOM | 686 | N TYR   | 90 | -55.203 | 47.259 | 1.623  | 1.00 95.89 | N |
| ATOM | 687 | CA TYR  | 90 | -54.718 | 47.616 | 0.320  | 1.00 95.89 | C |
| ATOM | 688 | CB TYR  | 90 | -55.458 | 48.849 | -0.229 | 1.00 95.89 | C |
| ATOM | 689 | CG TYR  | 90 | -54.984 | 49.151 | -1.609 | 1.00 95.89 | C |
| ATOM | 690 | CD1 TYR | 90 | -55.488 | 48.455 | -2.684 | 1.00 95.89 | C |
| ATOM | 691 | CD2 TYR | 90 | -54.052 | 50.137 | -1.829 | 1.00 95.89 | C |
| ATOM | 692 | CE1 TYR | 90 | -55.063 | 48.734 | -3.961 | 1.00 95.89 | C |
| ATOM | 693 | CE2 TYR | 90 | -53.623 | 50.420 | -3.105 | 1.00 95.89 | C |
| ATOM | 694 | CZ TYR  | 90 | -54.129 | 49.718 | -4.171 | 1.00 95.89 | C |
| ATOM | 695 | OH TYR  | 90 | -53.690 | 50.008 | -5.481 | 1.00 95.89 | O |
| ATOM | 696 | C TYR   | 90 | -53.251 | 47.937 | 0.401  | 1.00 95.89 | C |
| ATOM | 697 | O TYR   | 90 | -52.462 | 47.537 | -0.454 | 1.00 95.89 | O |
| ATOM | 698 | N ALA   | 91 | -52.846 | 48.671 | 1.451  | 1.00 72.64 | N |
| ATOM | 699 | CA ALA  | 91 | -51.486 | 49.107 | 1.628  | 1.00 72.64 | C |
| ATOM | 700 | CB ALA  | 91 | -51.305 | 50.003 | 2.865  | 1.00 72.64 | C |
| ATOM | 701 | C ALA   | 91 | -50.582 | 47.923 | 1.794  | 1.00 72.64 | C |
| ATOM | 702 | O ALA   | 91 | -49.421 | 47.944 | 1.388  | 1.00 72.64 | O |
| ATOM | 703 | N ALA   | 92 | -51.100 | 46.860 | 2.422  | 1.00 90.91 | N |
| ATOM | 704 | CA ALA  | 92 | -50.348 | 45.680 | 2.760  | 1.00 90.91 | C |
| ATOM | 705 | CB ALA  | 92 | -51.180 | 44.644 | 3.536  | 1.00 90.91 | C |
| ATOM | 706 | C ALA   | 92 | -49.806 | 45.001 | 1.538  | 1.00 90.91 | C |
| ATOM | 707 | O ALA   | 92 | -48.761 | 44.352 | 1.586  | 1.00 90.91 | O |
| ATOM | 708 | N THR   | 93 | -50.539 | 45.083 | 0.421  | 1.00161.01 | N |
| ATOM | 709 | CA THR  | 93 | -50.180 | 44.439 | -0.809 | 1.00161.01 | C |
| ATOM | 710 | CB THR  | 93 | -51.300 | 44.456 | -1.812 | 1.00161.01 | C |
| ATOM | 711 | OG1 THR | 93 | -51.633 | 45.791 | -2.166 | 1.00161.01 | O |
| ATOM | 712 | CG2 THR | 93 | -52.521 | 43.757 | -1.189 | 1.00161.01 | C |
| ATOM | 713 | C THR   | 93 | -48.970 | 45.077 | -1.454 | 1.00161.01 | C |
| ATOM | 714 | O THR   | 93 | -48.407 | 44.496 | -2.380 | 1.00161.01 | O |
| ATOM | 715 | N ILE   | 94 | -48.588 | 46.315 | -1.064 | 1.00218.00 | N |
| ATOM | 716 | CA ILE  | 94 | -47.494 | 47.016 | -1.714 | 1.00218.00 | C |
| ATOM | 717 | CB ILE  | 94 | -47.644 | 48.509 | -1.634 | 1.00218.00 | C |
| ATOM | 718 | CG1 ILE | 94 | -46.827 | 49.196 | -2.736 | 1.00218.00 | C |
| ATOM | 719 | CG2 ILE | 94 | -47.254 | 48.956 | -0.218 | 1.00218.00 | C |
| ATOM | 720 | CD1 ILE | 94 | -47.389 | 48.967 | -4.139 | 1.00218.00 | C |
| ATOM | 721 | C ILE   | 94 | -46.115 | 46.632 | -1.153 | 1.00218.00 | C |
| ATOM | 722 | O ILE   | 94 | -45.898 | 46.575 | 0.055  | 1.00218.00 | O |
| ATOM | 723 | N ARG   | 95 | -45.109 | 46.401 | -2.041 | 1.00281.96 | N |
| ATOM | 724 | CA ARG  | 95 | -43.778 | 45.903 | -1.679 | 1.00281.96 | C |
| ATOM | 725 | CB ARG  | 95 | -42.883 | 45.732 | -2.918 | 1.00281.96 | C |
| ATOM | 726 | CG ARG  | 95 | -43.537 | 44.906 | -4.024 | 1.00281.96 | C |
| ATOM | 727 | CD ARG  | 95 | -44.561 | 45.701 | -4.839 | 1.00281.96 | C |
| ATOM | 728 | NE ARG  | 95 | -45.224 | 44.751 | -5.775 | 1.00281.96 | N |
| ATOM | 729 | CZ ARG  | 95 | -44.571 | 44.318 | -6.892 | 1.00281.96 | C |
| ATOM | 730 | NH1 ARG | 95 | -43.286 | 44.714 | -7.127 | 1.00281.96 | N |

|      |     |     |     |     |         |        |        |            |   |
|------|-----|-----|-----|-----|---------|--------|--------|------------|---|
| ATOM | 731 | NH2 | ARG | 95  | -45.198 | 43.477 | -7.765 | 1.00281.96 | N |
| ATOM | 732 | C   | ARG | 95  | -43.059 | 46.854 | -0.772 | 1.00281.96 | C |
| ATOM | 733 | O   | ARG | 95  | -42.359 | 46.427 | 0.151  | 1.00281.96 | O |
| ATOM | 734 | N   | LYS | 96  | -43.190 | 48.170 | -1.033 | 1.00228.99 | N |
| ATOM | 735 | CA  | LYS | 96  | -42.494 | 49.142 | -0.242 | 1.00228.99 | C |
| ATOM | 736 | CB  | LYS | 96  | -42.495 | 50.577 | -0.814 | 1.00228.99 | C |
| ATOM | 737 | CG  | LYS | 96  | -43.813 | 51.058 | -1.418 | 1.00228.99 | C |
| ATOM | 738 | CD  | LYS | 96  | -44.147 | 50.409 | -2.760 | 1.00228.99 | C |
| ATOM | 739 | CE  | LYS | 96  | -43.457 | 51.080 | -3.950 | 1.00228.99 | C |
| ATOM | 740 | NZ  | LYS | 96  | -43.980 | 52.452 | -4.135 | 1.00228.99 | N |
| ATOM | 741 | C   | LYS | 96  | -43.001 | 49.165 | 1.171  | 1.00228.99 | C |
| ATOM | 742 | O   | LYS | 96  | -42.284 | 49.624 | 2.060  | 1.00228.99 | O |
| ATOM | 743 | N   | VAL | 97  | -44.260 | 48.746 | 1.431  | 1.00217.08 | N |
| ATOM | 744 | CA  | VAL | 97  | -44.700 | 48.792 | 2.807  | 1.00217.08 | C |
| ATOM | 745 | CB  | VAL | 97  | -46.182 | 48.860 | 3.044  | 1.00217.08 | C |
| ATOM | 746 | CG1 | VAL | 97  | -46.698 | 50.217 | 2.574  | 1.00217.08 | C |
| ATOM | 747 | CG2 | VAL | 97  | -46.862 | 47.652 | 2.391  | 1.00217.08 | C |
| ATOM | 748 | C   | VAL | 97  | -44.227 | 47.608 | 3.603  | 1.00217.08 | C |
| ATOM | 749 | O   | VAL | 97  | -44.363 | 46.452 | 3.200  | 1.00217.08 | O |
| ATOM | 750 | N   | GLN | 98  | -43.557 | 47.914 | 4.734  | 1.00177.28 | N |
| ATOM | 751 | CA  | GLN | 98  | -43.084 | 46.983 | 5.724  | 1.00177.28 | C |
| ATOM | 752 | CB  | GLN | 98  | -41.902 | 47.542 | 6.536  | 1.00177.28 | C |
| ATOM | 753 | CG  | GLN | 98  | -40.663 | 47.872 | 5.704  | 1.00177.28 | C |
| ATOM | 754 | CD  | GLN | 98  | -39.579 | 48.354 | 6.659  | 1.00177.28 | C |
| ATOM | 755 | OE1 | GLN | 98  | -39.803 | 48.471 | 7.862  | 1.00177.28 | O |
| ATOM | 756 | NE2 | GLN | 98  | -38.367 | 48.636 | 6.111  | 1.00177.28 | N |
| ATOM | 757 | C   | GLN | 98  | -44.119 | 46.613 | 6.749  | 1.00177.28 | C |
| ATOM | 758 | O   | GLN | 98  | -44.176 | 45.468 | 7.194  | 1.00177.28 | O |
| ATOM | 759 | N   | GLU | 99  | -44.938 | 47.588 | 7.200  | 1.00 98.86 | N |
| ATOM | 760 | CA  | GLU | 99  | -45.795 | 47.311 | 8.322  | 1.00 98.86 | C |
| ATOM | 761 | CB  | GLU | 99  | -45.074 | 47.594 | 9.652  | 1.00 98.86 | C |
| ATOM | 762 | CG  | GLU | 99  | -45.864 | 47.261 | 10.917 | 1.00 98.86 | C |
| ATOM | 763 | CD  | GLU | 99  | -45.019 | 47.731 | 12.093 | 1.00 98.86 | C |
| ATOM | 764 | OE1 | GLU | 99  | -44.090 | 48.548 | 11.856 | 1.00 98.86 | O |
| ATOM | 765 | OE2 | GLU | 99  | -45.288 | 47.284 | 13.239 | 1.00 98.86 | O |
| ATOM | 766 | C   | GLU | 99  | -46.988 | 48.211 | 8.273  | 1.00 98.86 | C |
| ATOM | 767 | O   | GLU | 99  | -46.895 | 49.363 | 7.848  | 1.00 98.86 | O |
| ATOM | 768 | N   | VAL | 100 | -48.152 | 47.700 | 8.730  | 1.00 91.04 | N |
| ATOM | 769 | CA  | VAL | 100 | -49.343 | 48.497 | 8.699  | 1.00 91.04 | C |
| ATOM | 770 | CB  | VAL | 100 | -50.321 | 48.004 | 7.672  | 1.00 91.04 | C |
| ATOM | 771 | CG1 | VAL | 100 | -51.568 | 48.903 | 7.698  | 1.00 91.04 | C |
| ATOM | 772 | CG2 | VAL | 100 | -49.606 | 47.948 | 6.309  | 1.00 91.04 | C |
| ATOM | 773 | C   | VAL | 100 | -50.005 | 48.416 | 10.041 | 1.00 91.04 | C |
| ATOM | 774 | O   | VAL | 100 | -50.241 | 47.326 | 10.562 | 1.00 91.04 | O |
| ATOM | 775 | N   | ARG | 101 | -50.325 | 49.583 | 10.640 | 1.00130.65 | N |
| ATOM | 776 | CA  | ARG | 101 | -50.996 | 49.574 | 11.909 | 1.00130.65 | C |
| ATOM | 777 | CB  | ARG | 101 | -50.153 | 50.136 | 13.062 | 1.00130.65 | C |
| ATOM | 778 | CG  | ARG | 101 | -49.053 | 49.172 | 13.496 | 1.00130.65 | C |
| ATOM | 779 | CD  | ARG | 101 | -48.323 | 49.605 | 14.764 | 1.00130.65 | C |
| ATOM | 780 | NE  | ARG | 101 | -47.525 | 48.438 | 15.219 | 1.00130.65 | N |
| ATOM | 781 | CZ  | ARG | 101 | -48.080 | 47.534 | 16.078 | 1.00130.65 | C |
| ATOM | 782 | NH1 | ARG | 101 | -49.327 | 47.753 | 16.588 | 1.00130.65 | N |
| ATOM | 783 | NH2 | ARG | 101 | -47.390 | 46.407 | 16.419 | 1.00130.65 | N |
| ATOM | 784 | C   | ARG | 101 | -52.233 | 50.405 | 11.802 | 1.00130.65 | C |
| ATOM | 785 | O   | ARG | 101 | -52.190 | 51.552 | 11.361 | 1.00130.65 | O |
| ATOM | 786 | N   | GLY | 102 | -53.381 | 49.847 | 12.237 | 1.00 39.09 | N |
| ATOM | 787 | CA  | GLY | 102 | -54.618 | 50.560 | 12.117 | 1.00 39.09 | C |
| ATOM | 788 | C   | GLY | 102 | -55.176 | 50.814 | 13.479 | 1.00 39.09 | C |
| ATOM | 789 | O   | GLY | 102 | -55.001 | 50.017 | 14.401 | 1.00 39.09 | O |
| ATOM | 790 | N   | TYR | 103 | -55.858 | 51.965 | 13.641 | 1.00122.71 | N |
| ATOM | 791 | CA  | TYR | 103 | -56.469 | 52.258 | 14.905 | 1.00122.71 | C |
| ATOM | 792 | CB  | TYR | 103 | -55.753 | 53.366 | 15.705 | 1.00122.71 | C |
| ATOM | 793 | CG  | TYR | 103 | -54.341 | 52.957 | 15.994 | 1.00122.71 | C |
| ATOM | 794 | CD1 | TYR | 103 | -54.047 | 51.964 | 16.901 | 1.00122.71 | C |
| ATOM | 795 | CD2 | TYR | 103 | -53.296 | 53.595 | 15.366 | 1.00122.71 | C |
| ATOM | 796 | CE1 | TYR | 103 | -52.743 | 51.606 | 17.164 | 1.00122.71 | C |

|      |     |         |     |         |        |        |            |   |
|------|-----|---------|-----|---------|--------|--------|------------|---|
| ATOM | 797 | CE2 TYR | 103 | -51.991 | 53.243 | 15.622 | 1.00122.71 | C |
| ATOM | 798 | CZ TYR  | 103 | -51.710 | 52.243 | 16.522 | 1.00122.71 | C |
| ATOM | 799 | OH TYR  | 103 | -50.373 | 51.877 | 16.790 | 1.00122.71 | O |
| ATOM | 800 | C TYR   | 103 | -57.868 | 52.733 | 14.626 | 1.00122.71 | C |
| ATOM | 801 | O TYR   | 103 | -58.096 | 53.495 | 13.687 | 1.00122.71 | O |
| ATOM | 802 | N THR   | 104 | -58.857 | 52.267 | 15.420 | 1.00121.06 | N |
| ATOM | 803 | CA THR  | 104 | -60.207 | 52.721 | 15.220 | 1.00121.06 | C |
| ATOM | 804 | CB THR  | 104 | -60.964 | 51.907 | 14.215 | 1.00121.06 | C |
| ATOM | 805 | OG1 THR | 104 | -62.156 | 52.578 | 13.840 | 1.00121.06 | O |
| ATOM | 806 | CG2 THR | 104 | -61.289 | 50.535 | 14.826 | 1.00121.06 | C |
| ATOM | 807 | C THR   | 104 | -60.936 | 52.666 | 16.533 | 1.00121.06 | C |
| ATOM | 808 | O THR   | 104 | -60.599 | 51.879 | 17.415 | 1.00121.06 | O |
| ATOM | 809 | N LYS   | 105 | -61.959 | 53.532 | 16.701 | 1.00109.81 | N |
| ATOM | 810 | CA LYS  | 105 | -62.704 | 53.618 | 17.930 | 1.00109.81 | C |
| ATOM | 811 | CB LYS  | 105 | -63.691 | 54.799 | 17.930 | 1.00109.81 | C |
| ATOM | 812 | CG LYS  | 105 | -64.397 | 55.028 | 19.270 | 1.00109.81 | C |
| ATOM | 813 | CD LYS  | 105 | -63.460 | 55.498 | 20.384 | 1.00109.81 | C |
| ATOM | 814 | CE LYS  | 105 | -64.180 | 55.891 | 21.676 | 1.00109.81 | C |
| ATOM | 815 | NZ LYS  | 105 | -64.711 | 57.268 | 21.563 | 1.00109.81 | N |
| ATOM | 816 | C LYS   | 105 | -63.491 | 52.364 | 18.176 | 1.00109.81 | C |
| ATOM | 817 | O LYS   | 105 | -63.444 | 51.799 | 19.268 | 1.00109.81 | O |
| ATOM | 818 | N GLY   | 106 | -64.247 | 51.895 | 17.163 | 1.0023.49  | N |
| ATOM | 819 | CA GLY  | 106 | -65.027 | 50.697 | 17.316 | 1.0023.49  | C |
| ATOM | 820 | C GLY   | 106 | -66.138 | 50.974 | 18.280 | 1.0023.49  | C |
| ATOM | 821 | O GLY   | 106 | -66.453 | 52.124 | 18.581 | 1.0023.49  | O |
| ATOM | 822 | N GLY   | 107 | -66.765 | 49.899 | 18.798 | 1.00142.36 | N |
| ATOM | 823 | CA GLY  | 107 | -67.807 | 50.060 | 19.772 | 1.00142.36 | C |
| ATOM | 824 | C GLY   | 107 | -69.113 | 50.251 | 19.073 | 1.00142.36 | C |
| ATOM | 825 | O GLY   | 107 | -69.231 | 50.122 | 17.856 | 1.00142.36 | O |
| ATOM | 826 | N PRO   | 108 | -70.107 | 50.563 | 19.861 | 1.00129.02 | N |
| ATOM | 827 | CA PRO  | 108 | -71.428 | 50.746 | 19.336 | 1.00129.02 | C |
| ATOM | 828 | CD PRO  | 108 | -70.121 | 50.151 | 21.255 | 1.00129.02 | C |
| ATOM | 829 | CB PRO  | 108 | -72.346 | 50.846 | 20.553 | 1.00129.02 | C |
| ATOM | 830 | CG PRO  | 108 | -71.607 | 50.029 | 21.630 | 1.00129.02 | C |
| ATOM | 831 | C PRO   | 108 | -71.489 | 51.928 | 18.433 | 1.00129.02 | C |
| ATOM | 832 | O PRO   | 108 | -70.981 | 52.987 | 18.798 | 1.00129.02 | O |
| ATOM | 833 | N GLY   | 109 | -72.119 | 51.769 | 17.254 | 1.0018.77  | N |
| ATOM | 834 | CA GLY  | 109 | -72.285 | 52.865 | 16.348 | 1.0018.77  | C |
| ATOM | 835 | C GLY   | 109 | -71.024 | 53.090 | 15.572 | 1.0018.77  | C |
| ATOM | 836 | O GLY   | 109 | -70.902 | 54.105 | 14.886 | 1.0018.77  | O |
| ATOM | 837 | N HIS   | 110 | -70.046 | 52.165 | 15.650 | 1.0047.63  | N |
| ATOM | 838 | CA HIS  | 110 | -68.832 | 52.372 | 14.905 | 1.0047.63  | C |
| ATOM | 839 | ND1 HIS | 110 | -67.460 | 55.283 | 15.915 | 1.0047.63  | N |
| ATOM | 840 | CG HIS  | 110 | -67.772 | 54.069 | 16.483 | 1.0047.63  | C |
| ATOM | 841 | CB HIS  | 110 | -67.626 | 52.750 | 15.782 | 1.0047.63  | C |
| ATOM | 842 | NE2 HIS | 110 | -68.173 | 55.711 | 17.978 | 1.0047.63  | N |
| ATOM | 843 | CD2 HIS | 110 | -68.206 | 54.349 | 17.743 | 1.0047.63  | C |
| ATOM | 844 | CE1 HIS | 110 | -67.718 | 56.231 | 16.852 | 1.0047.63  | C |
| ATOM | 845 | C HIS   | 110 | -68.474 | 51.084 | 14.231 | 1.0047.63  | C |
| ATOM | 846 | O HIS   | 110 | -68.793 | 50.003 | 14.721 | 1.0047.63  | O |
| ATOM | 847 | N GLU   | 111 | -67.795 | 51.166 | 13.070 | 1.0061.55  | N |
| ATOM | 848 | CA GLU  | 111 | -67.430 | 49.964 | 12.376 | 1.0061.55  | C |
| ATOM | 849 | CB GLU  | 111 | -67.034 | 50.201 | 10.915 | 1.0061.55  | C |
| ATOM | 850 | CG GLU  | 111 | -68.192 | 50.691 | 10.051 | 1.0061.55  | C |
| ATOM | 851 | CD GLU  | 111 | -67.630 | 50.880 | 8.659  | 1.0061.55  | C |
| ATOM | 852 | OE1 GLU | 111 | -66.433 | 50.535 | 8.469  | 1.0061.55  | O |
| ATOM | 853 | OE2 GLU | 111 | -68.378 | 51.369 | 7.772  | 1.0061.55  | O |
| ATOM | 854 | C GLU   | 111 | -66.252 | 49.348 | 13.059 | 1.0061.55  | C |
| ATOM | 855 | O GLU   | 111 | -65.354 | 50.044 | 13.532 | 1.0061.55  | O |
| ATOM | 856 | N GLU   | 112 | -66.234 | 48.003 | 13.117 | 1.0096.10  | N |
| ATOM | 857 | CA GLU  | 112 | -65.136 | 47.300 | 13.716 | 1.0096.10  | C |
| ATOM | 858 | CB GLU  | 112 | -65.555 | 46.149 | 14.650 | 1.0096.10  | C |
| ATOM | 859 | CG GLU  | 112 | -66.099 | 46.616 | 16.005 | 1.0096.10  | C |
| ATOM | 860 | CD GLU  | 112 | -64.914 | 46.929 | 16.913 | 1.0096.10  | C |
| ATOM | 861 | OE1 GLU | 112 | -63.754 | 46.747 | 16.460 | 1.0096.10  | O |
| ATOM | 862 | OE2 GLU | 112 | -65.154 | 47.347 | 18.077 | 1.0096.10  | O |

|      |     |     |     |     |         |        |        |      |        |   |
|------|-----|-----|-----|-----|---------|--------|--------|------|--------|---|
| ATOM | 863 | C   | GLU | 112 | -64.313 | 46.718 | 12.606 | 1.00 | 96.10  | C |
| ATOM | 864 | O   | GLU | 112 | -64.794 | 46.516 | 11.492 | 1.00 | 96.10  | O |
| ATOM | 865 | N   | PRO | 113 | -63.061 | 46.467 | 12.885 | 1.00 | 89.44  | N |
| ATOM | 866 | CA  | PRO | 113 | -62.191 | 45.913 | 11.881 | 1.00 | 89.44  | C |
| ATOM | 867 | CD  | PRO | 113 | -62.336 | 47.298 | 13.833 | 1.00 | 89.44  | C |
| ATOM | 868 | CB  | PRO | 113 | -60.777 | 46.052 | 12.437 | 1.00 | 89.44  | C |
| ATOM | 869 | CG  | PRO | 113 | -60.874 | 47.286 | 13.354 | 1.00 | 89.44  | C |
| ATOM | 870 | C   | PRO | 113 | -62.574 | 44.514 | 11.495 | 1.00 | 89.44  | C |
| ATOM | 871 | O   | PRO | 113 | -62.991 | 43.749 | 12.362 | 1.00 | 89.44  | O |
| ATOM | 872 | N   | MET | 114 | -62.428 | 44.157 | 10.199 | 1.00 | 95.13  | N |
| ATOM | 873 | CA  | MET | 114 | -62.796 | 42.846 | 9.728  | 1.00 | 95.13  | C |
| ATOM | 874 | CB  | MET | 114 | -63.616 | 42.899 | 8.429  | 1.00 | 95.13  | C |
| ATOM | 875 | CG  | MET | 114 | -64.895 | 43.728 | 8.580  | 1.00 | 95.13  | C |
| ATOM | 876 | SD  | MET | 114 | -65.809 | 44.029 | 7.038  | 1.00 | 95.13  | S |
| ATOM | 877 | CE  | MET | 114 | -66.646 | 42.418 | 7.018  | 1.00 | 95.13  | C |
| ATOM | 878 | C   | MET | 114 | -61.525 | 42.097 | 9.441  | 1.00 | 95.13  | C |
| ATOM | 879 | O   | MET | 114 | -60.584 | 42.654 | 8.880  | 1.00 | 95.13  | O |
| ATOM | 880 | N   | LEU | 115 | -61.453 | 40.802 | 9.820  | 1.00 | 131.88 | N |
| ATOM | 881 | CA  | LEU | 115 | -60.229 | 40.075 | 9.596  | 1.00 | 131.88 | C |
| ATOM | 882 | CB  | LEU | 115 | -60.001 | 38.839 | 10.490 | 1.00 | 131.88 | C |
| ATOM | 883 | CG  | LEU | 115 | -59.945 | 39.084 | 12.008 | 1.00 | 131.88 | C |
| ATOM | 884 | CD1 | LEU | 115 | -58.852 | 40.091 | 12.389 | 1.00 | 131.88 | C |
| ATOM | 885 | CD2 | LEU | 115 | -61.327 | 39.411 | 12.579 | 1.00 | 131.88 | C |
| ATOM | 886 | C   | LEU | 115 | -60.253 | 39.498 | 8.215  | 1.00 | 131.88 | C |
| ATOM | 887 | O   | LEU | 115 | -61.188 | 38.788 | 7.843  | 1.00 | 131.88 | O |
| ATOM | 888 | N   | VAL | 116 | -59.187 | 39.750 | 7.426  | 1.00 | 139.31 | N |
| ATOM | 889 | CA  | VAL | 116 | -59.163 | 39.252 | 6.077  | 1.00 | 139.31 | C |
| ATOM | 890 | CB  | VAL | 116 | -59.375 | 40.340 | 5.064  | 1.00 | 139.31 | C |
| ATOM | 891 | CG1 | VAL | 116 | -59.214 | 39.758 | 3.652  | 1.00 | 139.31 | C |
| ATOM | 892 | CG2 | VAL | 116 | -60.760 | 40.961 | 5.319  | 1.00 | 139.31 | C |
| ATOM | 893 | C   | VAL | 116 | -57.838 | 38.608 | 5.806  | 1.00 | 139.31 | C |
| ATOM | 894 | O   | VAL | 116 | -56.841 | 38.901 | 6.452  | 1.00 | 139.31 | O |
| ATOM | 895 | N   | GLN | 117 | -57.850 | 37.620 | 4.898  | 1.00 | 186.79 | N |
| ATOM | 896 | CA  | GLN | 117 | -56.789 | 36.805 | 4.370  | 1.00 | 186.79 | C |
| ATOM | 897 | CB  | GLN | 117 | -57.252 | 35.389 | 4.030  | 1.00 | 186.79 | C |
| ATOM | 898 | CG  | GLN | 117 | -57.822 | 34.752 | 5.295  | 1.00 | 186.79 | C |
| ATOM | 899 | CD  | GLN | 117 | -57.770 | 33.243 | 5.177  | 1.00 | 186.79 | C |
| ATOM | 900 | OE1 | GLN | 117 | -58.773 | 32.552 | 5.343  | 1.00 | 186.79 | O |
| ATOM | 901 | NE2 | GLN | 117 | -56.547 | 32.716 | 4.916  | 1.00 | 186.79 | N |
| ATOM | 902 | C   | GLN | 117 | -56.056 | 37.412 | 3.211  | 1.00 | 186.79 | C |
| ATOM | 903 | O   | GLN | 117 | -55.304 | 36.710 | 2.538  | 1.00 | 186.79 | O |
| ATOM | 904 | N   | SER | 118 | -56.390 | 38.647 | 2.807  | 1.00 | 205.44 | N |
| ATOM | 905 | CA  | SER | 118 | -55.768 | 39.237 | 1.651  | 1.00 | 205.44 | C |
| ATOM | 906 | CB  | SER | 118 | -56.253 | 40.675 | 1.391  | 1.00 | 205.44 | C |
| ATOM | 907 | OG  | SER | 118 | -56.044 | 41.479 | 2.544  | 1.00 | 205.44 | O |
| ATOM | 908 | C   | SER | 118 | -54.268 | 39.225 | 1.751  | 1.00 | 205.44 | C |
| ATOM | 909 | O   | SER | 118 | -53.684 | 39.113 | 2.829  | 1.00 | 205.44 | O |
| ATOM | 910 | N   | TYR | 119 | -53.601 | 39.335 | 0.578  | 1.00 | 172.93 | N |
| ATOM | 911 | CA  | TYR | 119 | -52.168 | 39.252 | 0.502  | 1.00 | 172.93 | C |
| ATOM | 912 | CB  | TYR | 119 | -51.607 | 39.446 | -0.924 | 1.00 | 172.93 | C |
| ATOM | 913 | CG  | TYR | 119 | -50.116 | 39.408 | -0.842 | 1.00 | 172.93 | C |
| ATOM | 914 | CD1 | TYR | 119 | -49.441 | 38.212 | -0.744 | 1.00 | 172.93 | C |
| ATOM | 915 | CD2 | TYR | 119 | -49.388 | 40.576 | -0.875 | 1.00 | 172.93 | C |
| ATOM | 916 | CE1 | TYR | 119 | -48.066 | 38.182 | -0.666 | 1.00 | 172.93 | C |
| ATOM | 917 | CE2 | TYR | 119 | -48.013 | 40.552 | -0.798 | 1.00 | 172.93 | C |
| ATOM | 918 | CZ  | TYR | 119 | -47.348 | 39.355 | -0.690 | 1.00 | 172.93 | C |
| ATOM | 919 | OH  | TYR | 119 | -45.937 | 39.331 | -0.606 | 1.00 | 172.93 | O |
| ATOM | 920 | C   | TYR | 119 | -51.535 | 40.279 | 1.387  | 1.00 | 172.93 | C |
| ATOM | 921 | O   | TYR | 119 | -51.805 | 41.474 | 1.269  | 1.00 | 172.93 | O |
| ATOM | 922 | N   | GLY | 120 | -50.635 | 39.818 | 2.284  | 1.00 | 86.06  | N |
| ATOM | 923 | CA  | GLY | 120 | -49.917 | 40.706 | 3.155  | 1.00 | 86.06  | C |
| ATOM | 924 | C   | GLY | 120 | -50.663 | 40.925 | 4.435  | 1.00 | 86.06  | C |
| ATOM | 925 | O   | GLY | 120 | -50.353 | 41.845 | 5.189  | 1.00 | 86.06  | O |
| ATOM | 926 | N   | TRP | 121 | -51.628 | 40.047 | 4.745  | 1.00 | 131.21 | N |
| ATOM | 927 | CA  | TRP | 121 | -52.448 | 40.201 | 5.914  | 1.00 | 131.21 | C |
| ATOM | 928 | CB  | TRP | 121 | -53.510 | 39.093 | 6.061  | 1.00 | 131.21 | C |

|      |     |     |     |     |         |        |        |            |   |
|------|-----|-----|-----|-----|---------|--------|--------|------------|---|
| ATOM | 929 | CG  | TRP | 121 | -52.986 | 37.670 | 6.070  | 1.00131.21 | C |
| ATOM | 930 | CD2 | TRP | 121 | -52.595 | 36.930 | 7.243  | 1.00131.21 | C |
| ATOM | 931 | CD1 | TRP | 121 | -52.824 | 36.822 | 5.014  | 1.00131.21 | C |
| ATOM | 932 | NE1 | TRP | 121 | -52.370 | 35.601 | 5.451  | 1.00131.21 | N |
| ATOM | 933 | CE2 | TRP | 121 | -52.224 | 35.654 | 6.820  | 1.00131.21 | C |
| ATOM | 934 | CE3 | TRP | 121 | -52.557 | 37.280 | 8.563  | 1.00131.21 | C |
| ATOM | 935 | CZ2 | TRP | 121 | -51.809 | 34.707 | 7.713  | 1.00131.21 | C |
| ATOM | 936 | CZ3 | TRP | 121 | -52.130 | 36.326 | 9.461  | 1.00131.21 | C |
| ATOM | 937 | CH2 | TRP | 121 | -51.764 | 35.063 | 9.043  | 1.00131.21 | C |
| ATOM | 938 | C   | TRP | 121 | -51.593 | 40.182 | 7.153  | 1.00131.21 | C |
| ATOM | 939 | O   | TRP | 121 | -51.955 | 40.783 | 8.163  | 1.00131.21 | O |
| ATOM | 940 | N   | ASN | 122 | -50.447 | 39.479 | 7.120  | 1.00299.96 | N |
| ATOM | 941 | CA  | ASN | 122 | -49.585 | 39.310 | 8.269  | 1.00299.96 | C |
| ATOM | 942 | CB  | ASN | 122 | -48.249 | 38.630 | 7.959  | 1.00299.96 | C |
| ATOM | 943 | CG  | ASN | 122 | -48.513 | 37.399 | 7.151  | 1.00299.96 | C |
| ATOM | 944 | OD1 | ASN | 122 | -48.753 | 37.495 | 5.950  | 1.00299.96 | O |
| ATOM | 945 | ND2 | ASN | 122 | -48.457 | 36.216 | 7.813  | 1.00299.96 | N |
| ATOM | 946 | C   | ASN | 122 | -49.068 | 40.630 | 8.756  | 1.00299.96 | C |
| ATOM | 947 | O   | ASN | 122 | -48.783 | 40.787 | 9.938  | 1.00299.96 | O |
| ATOM | 948 | N   | ILE | 123 | -48.813 | 41.566 | 7.833  | 1.00252.86 | N |
| ATOM | 949 | CA  | ILE | 123 | -48.263 | 42.866 | 8.118  | 1.00252.86 | C |
| ATOM | 950 | CB  | ILE | 123 | -47.937 | 43.663 | 6.882  | 1.00252.86 | C |
| ATOM | 951 | CG1 | ILE | 123 | -46.854 | 42.978 | 6.059  | 1.00252.86 | C |
| ATOM | 952 | CG2 | ILE | 123 | -47.522 | 45.090 | 7.276  | 1.00252.86 | C |
| ATOM | 953 | CD1 | ILE | 123 | -46.521 | 43.783 | 4.808  | 1.00252.86 | C |
| ATOM | 954 | C   | ILE | 123 | -49.232 | 43.698 | 8.895  | 1.00252.86 | C |
| ATOM | 955 | O   | ILE | 123 | -48.843 | 44.622 | 9.611  | 1.00252.86 | O |
| ATOM | 956 | N   | VAL | 124 | -50.535 | 43.456 | 8.689  | 1.00268.61 | N |
| ATOM | 957 | CA  | VAL | 124 | -51.530 | 44.330 | 9.232  | 1.00268.61 | C |
| ATOM | 958 | CB  | VAL | 124 | -52.804 | 44.319 | 8.441  | 1.00268.61 | C |
| ATOM | 959 | CG1 | VAL | 124 | -53.834 | 45.193 | 9.168  | 1.00268.61 | C |
| ATOM | 960 | CG2 | VAL | 124 | -52.494 | 44.798 | 7.013  | 1.00268.61 | C |
| ATOM | 961 | C   | VAL | 124 | -51.867 | 44.031 | 10.658 | 1.00268.61 | C |
| ATOM | 962 | O   | VAL | 124 | -52.010 | 42.879 | 11.064 | 1.00268.61 | O |
| ATOM | 963 | N   | ARG | 125 | -51.997 | 45.108 | 11.466 | 1.00297.92 | N |
| ATOM | 964 | CA  | ARG | 125 | -52.399 | 44.970 | 12.835 | 1.00297.92 | C |
| ATOM | 965 | CB  | ARG | 125 | -51.248 | 45.267 | 13.817 | 1.00297.92 | C |
| ATOM | 966 | CG  | ARG | 125 | -51.444 | 44.752 | 15.246 | 1.00297.92 | C |
| ATOM | 967 | CD  | ARG | 125 | -52.137 | 45.731 | 16.194 | 1.00297.92 | C |
| ATOM | 968 | NE  | ARG | 125 | -53.488 | 45.180 | 16.489 | 1.00297.92 | N |
| ATOM | 969 | CZ  | ARG | 125 | -53.641 | 44.287 | 17.512 | 1.00297.92 | C |
| ATOM | 970 | NH1 | ARG | 125 | -52.560 | 43.912 | 18.257 | 1.00297.92 | N |
| ATOM | 971 | NH2 | ARG | 125 | -54.874 | 43.770 | 17.790 | 1.00297.92 | N |
| ATOM | 972 | C   | ARG | 125 | -53.476 | 45.991 | 13.067 | 1.00297.92 | C |
| ATOM | 973 | O   | ARG | 125 | -53.194 | 47.187 | 13.098 | 1.00297.92 | O |
| ATOM | 974 | N   | LEU | 126 | -54.740 | 45.543 | 13.251 | 1.00174.79 | N |
| ATOM | 975 | CA  | LEU | 126 | -55.838 | 46.454 | 13.458 | 1.00174.79 | C |
| ATOM | 976 | CB  | LEU | 126 | -57.156 | 46.063 | 12.751 | 1.00174.79 | C |
| ATOM | 977 | CG  | LEU | 126 | -57.130 | 45.959 | 11.211 | 1.00174.79 | C |
| ATOM | 978 | CD1 | LEU | 126 | -56.755 | 47.281 | 10.530 | 1.00174.79 | C |
| ATOM | 979 | CD2 | LEU | 126 | -56.289 | 44.770 | 10.742 | 1.00174.79 | C |
| ATOM | 980 | C   | LEU | 126 | -56.171 | 46.438 | 14.918 | 1.00174.79 | C |
| ATOM | 981 | O   | LEU | 126 | -56.204 | 45.379 | 15.545 | 1.00174.79 | O |
| ATOM | 982 | N   | LYS | 127 | -56.428 | 47.630 | 15.499 | 1.00217.50 | N |
| ATOM | 983 | CA  | LYS | 127 | -56.757 | 47.742 | 16.895 | 1.00217.50 | C |
| ATOM | 984 | CB  | LYS | 127 | -55.735 | 48.572 | 17.690 | 1.00217.50 | C |
| ATOM | 985 | CG  | LYS | 127 | -54.458 | 47.819 | 18.053 | 1.00217.50 | C |
| ATOM | 986 | CD  | LYS | 127 | -54.695 | 46.691 | 19.057 | 1.00217.50 | C |
| ATOM | 987 | CE  | LYS | 127 | -55.095 | 47.197 | 20.443 | 1.00217.50 | C |
| ATOM | 988 | NZ  | LYS | 127 | -54.009 | 48.031 | 21.003 | 1.00217.50 | N |
| ATOM | 989 | C   | LYS | 127 | -58.051 | 48.472 | 17.026 | 1.00217.50 | C |
| ATOM | 990 | O   | LYS | 127 | -58.288 | 49.468 | 16.348 | 1.00217.50 | O |
| ATOM | 991 | N   | SER | 128 | -58.920 | 48.001 | 17.939 | 1.0092.24  | N |
| ATOM | 992 | CA  | SER | 128 | -60.177 | 48.661 | 18.131 | 1.0092.24  | C |
| ATOM | 993 | CB  | SER | 128 | -61.393 | 47.724 | 18.045 | 1.0092.24  | C |
| ATOM | 994 | OG  | SER | 128 | -61.393 | 46.825 | 19.144 | 1.0092.24  | O |

|      |      |     |     |     |         |        |        |            |       |   |
|------|------|-----|-----|-----|---------|--------|--------|------------|-------|---|
| ATOM | 995  | C   | SER | 128 | -60.182 | 49.238 | 19.510 | 1.00       | 92.24 | C |
| ATOM | 996  | O   | SER | 128 | -59.339 | 48.903 | 20.340 | 1.00       | 92.24 | O |
| ATOM | 997  | N   | GLY | 129 | -61.132 | 50.157 | 19.772 | 1.00       | 28.87 | N |
| ATOM | 998  | CA  | GLY | 129 | -61.264 | 50.744 | 21.075 | 1.00       | 28.87 | C |
| ATOM | 999  | C   | GLY | 129 | -60.217 | 51.802 | 21.268 | 1.00       | 28.87 | C |
| ATOM | 1000 | O   | GLY | 129 | -59.860 | 52.117 | 22.402 | 1.00       | 28.87 | O |
| ATOM | 1001 | N   | VAL | 130 | -59.698 | 52.391 | 20.171 | 1.00       | 47.42 | N |
| ATOM | 1002 | CA  | VAL | 130 | -58.666 | 53.379 | 20.321 | 1.00       | 47.42 | C |
| ATOM | 1003 | CB  | VAL | 130 | -57.460 | 53.102 | 19.471 | 1.00       | 47.42 | C |
| ATOM | 1004 | CG1 | VAL | 130 | -56.484 | 54.286 | 19.597 | 1.00       | 47.42 | C |
| ATOM | 1005 | CG2 | VAL | 130 | -56.865 | 51.746 | 19.891 | 1.00       | 47.42 | C |
| ATOM | 1006 | C   | VAL | 130 | -59.194 | 54.721 | 19.918 | 1.00       | 47.42 | C |
| ATOM | 1007 | O   | VAL | 130 | -59.886 | 54.861 | 18.910 | 1.00       | 47.42 | O |
| ATOM | 1008 | N   | ASP | 131 | -58.877 | 55.752 | 20.728 | 1.00       | 49.28 | N |
| ATOM | 1009 | CA  | ASP | 131 | -59.262 | 57.105 | 20.439 | 1.00       | 49.28 | C |
| ATOM | 1010 | CB  | ASP | 131 | -59.779 | 57.863 | 21.676 | 1.00       | 49.28 | C |
| ATOM | 1011 | CG  | ASP | 131 | -60.307 | 59.228 | 21.251 | 1.00       | 49.28 | C |
| ATOM | 1012 | OD1 | ASP | 131 | -60.050 | 59.641 | 20.089 | 1.00       | 49.28 | O |
| ATOM | 1013 | OD2 | ASP | 131 | -60.980 | 59.879 | 22.095 | 1.00       | 49.28 | O |
| ATOM | 1014 | C   | ASP | 131 | -58.013 | 57.791 | 19.971 | 1.00       | 49.28 | C |
| ATOM | 1015 | O   | ASP | 131 | -57.094 | 58.037 | 20.749 | 1.00       | 49.28 | O |
| ATOM | 1016 | N   | VAL | 132 | -57.970 | 58.128 | 18.672 | 1.00       | 63.12 | N |
| ATOM | 1017 | CA  | VAL | 132 | -56.812 | 58.675 | 18.025 | 1.00       | 63.12 | C |
| ATOM | 1018 | CB  | VAL | 132 | -57.020 | 58.836 | 16.546 | 1.00       | 63.12 | C |
| ATOM | 1019 | CG1 | VAL | 132 | -57.284 | 57.447 | 15.940 | 1.00       | 63.12 | C |
| ATOM | 1020 | CG2 | VAL | 132 | -58.159 | 59.843 | 16.308 | 1.00       | 63.12 | C |
| ATOM | 1021 | C   | VAL | 132 | -56.454 | 60.018 | 18.586 | 1.00       | 63.12 | C |
| ATOM | 1022 | O   | VAL | 132 | -55.279 | 60.381 | 18.634 | 1.00       | 63.12 | O |
| ATOM | 1023 | N   | PHE | 133 | -57.451 | 60.810 | 19.010 | 1.00       | 88.78 | N |
| ATOM | 1024 | CA  | PHE | 133 | -57.135 | 62.126 | 19.487 | 1.00       | 88.78 | C |
| ATOM | 1025 | CB  | PHE | 133 | -58.364 | 62.958 | 19.882 | 1.00       | 88.78 | C |
| ATOM | 1026 | CG  | PHE | 133 | -58.988 | 63.418 | 18.611 | 1.00       | 88.78 | C |
| ATOM | 1027 | CD1 | PHE | 133 | -58.455 | 64.501 | 17.960 | 1.00       | 88.78 | C |
| ATOM | 1028 | CD2 | PHE | 133 | -60.066 | 62.776 | 18.051 | 1.00       | 88.78 | C |
| ATOM | 1029 | CE1 | PHE | 133 | -58.997 | 64.955 | 16.782 | 1.00       | 88.78 | C |
| ATOM | 1030 | CE2 | PHE | 133 | -60.613 | 63.227 | 16.872 | 1.00       | 88.78 | C |
| ATOM | 1031 | CZ  | PHE | 133 | -60.082 | 64.320 | 16.233 | 1.00       | 88.78 | C |
| ATOM | 1032 | C   | PHE | 133 | -56.226 | 62.036 | 20.669 | 1.00       | 88.78 | C |
| ATOM | 1033 | O   | PHE | 133 | -55.308 | 62.841 | 20.814 | 1.00       | 88.78 | O |
| ATOM | 1034 | N   | HIS | 134 | -56.498 | 61.081 | 21.567 | 1.00       | 90.19 | N |
| ATOM | 1035 | CA  | HIS | 134 | -55.741 | 60.870 | 22.768 | 1.00       | 90.19 | C |
| ATOM | 1036 | ND1 | HIS | 134 | -58.883 | 60.883 | 23.573 | 1.00       | 90.19 | N |
| ATOM | 1037 | CG  | HIS | 134 | -57.722 | 60.723 | 24.297 | 1.00       | 90.19 | C |
| ATOM | 1038 | CB  | HIS | 134 | -56.504 | 60.008 | 23.786 | 1.00       | 90.19 | C |
| ATOM | 1039 | NE2 | HIS | 134 | -59.207 | 61.899 | 25.524 | 1.00       | 90.19 | N |
| ATOM | 1040 | CD2 | HIS | 134 | -57.938 | 61.350 | 25.487 | 1.00       | 90.19 | C |
| ATOM | 1041 | CE1 | HIS | 134 | -59.737 | 61.594 | 24.353 | 1.00       | 90.19 | C |
| ATOM | 1042 | C   | HIS | 134 | -54.397 | 60.249 | 22.498 | 1.00       | 90.19 | C |
| ATOM | 1043 | O   | HIS | 134 | -53.464 | 60.447 | 23.271 | 1.00       | 90.19 | O |
| ATOM | 1044 | N   | MET | 135 | -54.269 | 59.463 | 21.412 | 1.00166.55 |       | N |
| ATOM | 1045 | CA  | MET | 135 | -53.090 | 58.700 | 21.078 | 1.00166.55 |       | C |
| ATOM | 1046 | CB  | MET | 135 | -53.305 | 57.914 | 19.771 | 1.00166.55 |       | C |
| ATOM | 1047 | CG  | MET | 135 | -52.116 | 57.082 | 19.289 | 1.00166.55 |       | C |
| ATOM | 1048 | SD  | MET | 135 | -51.803 | 55.559 | 20.223 | 1.00166.55 |       | S |
| ATOM | 1049 | CE  | MET | 135 | -50.693 | 54.868 | 18.963 | 1.00166.55 |       | C |
| ATOM | 1050 | C   | MET | 135 | -51.884 | 59.573 | 20.858 | 1.00166.55 |       | C |
| ATOM | 1051 | O   | MET | 135 | -51.948 | 60.595 | 20.179 | 1.00166.55 |       | O |
| ATOM | 1052 | N   | ALA | 136 | -50.729 | 59.156 | 21.435 | 1.00       | 79.47 | N |
| ATOM | 1053 | CA  | ALA | 136 | -49.484 | 59.857 | 21.269 | 1.00       | 79.47 | C |
| ATOM | 1054 | CB  | ALA | 136 | -48.416 | 59.464 | 22.304 | 1.00       | 79.47 | C |
| ATOM | 1055 | C   | ALA | 136 | -48.950 | 59.512 | 19.912 | 1.00       | 79.47 | C |
| ATOM | 1056 | O   | ALA | 136 | -49.141 | 58.395 | 19.432 | 1.00       | 79.47 | O |
| ATOM | 1057 | N   | ALA | 137 | -48.241 | 60.463 | 19.265 | 1.00       | 50.21 | N |
| ATOM | 1058 | CA  | ALA | 137 | -47.764 | 60.236 | 17.935 | 1.00       | 50.21 | C |
| ATOM | 1059 | CB  | ALA | 137 | -47.228 | 61.500 | 17.237 | 1.00       | 50.21 | C |
| ATOM | 1060 | C   | ALA | 137 | -46.655 | 59.240 | 17.970 | 1.00       | 50.21 | C |



|      |      |     |     |     |         |        |        |      |        |   |
|------|------|-----|-----|-----|---------|--------|--------|------|--------|---|
| ATOM | 1061 | O   | ALA | 137 | -45.974 | 59.073 | 18.979 | 1.00 | 50.21  | O |
| ATOM | 1062 | N   | GLU | 138 | -46.479 | 58.525 | 16.843 | 1.00 | 122.89 | N |
| ATOM | 1063 | CA  | GLU | 138 | -45.450 | 57.541 | 16.721 | 1.00 | 122.89 | C |
| ATOM | 1064 | CB  | GLU | 138 | -45.989 | 56.104 | 16.822 | 1.00 | 122.89 | C |
| ATOM | 1065 | CG  | GLU | 138 | -47.145 | 55.811 | 15.868 | 1.00 | 122.89 | C |
| ATOM | 1066 | CD  | GLU | 138 | -47.756 | 54.479 | 16.279 | 1.00 | 122.89 | C |
| ATOM | 1067 | OE1 | GLU | 138 | -47.326 | 53.930 | 17.328 | 1.00 | 122.89 | O |
| ATOM | 1068 | OE2 | GLU | 138 | -48.666 | 53.997 | 15.554 | 1.00 | 122.89 | O |
| ATOM | 1069 | C   | GLU | 138 | -44.829 | 57.763 | 15.388 | 1.00 | 122.89 | C |
| ATOM | 1070 | O   | GLU | 138 | -45.453 | 58.360 | 14.517 | 1.00 | 122.89 | O |
| ATOM | 1071 | N   | PRO | 139 | -43.609 | 57.347 | 15.200 | 1.00 | 97.37  | N |
| ATOM | 1072 | CA  | PRO | 139 | -42.947 | 57.578 | 13.945 | 1.00 | 97.37  | C |
| ATOM | 1073 | CD  | PRO | 139 | -42.671 | 57.174 | 16.291 | 1.00 | 97.37  | C |
| ATOM | 1074 | CB  | PRO | 139 | -41.454 | 57.362 | 14.206 | 1.00 | 97.37  | C |
| ATOM | 1075 | CG  | PRO | 139 | -41.392 | 56.688 | 15.590 | 1.00 | 97.37  | C |
| ATOM | 1076 | C   | PRO | 139 | -43.511 | 56.700 | 12.877 | 1.00 | 97.37  | C |
| ATOM | 1077 | O   | PRO | 139 | -43.864 | 55.560 | 13.176 | 1.00 | 97.37  | O |
| ATOM | 1078 | N   | CYS | 140 | -43.620 | 57.214 | 11.633 | 1.00 | 99.40  | N |
| ATOM | 1079 | CA  | CYS | 140 | -44.098 | 56.393 | 10.558 | 1.00 | 99.40  | C |
| ATOM | 1080 | CB  | CYS | 140 | -45.624 | 56.173 | 10.531 | 1.00 | 99.40  | C |
| ATOM | 1081 | SG  | CYS | 140 | -46.580 | 57.604 | 9.955  | 1.00 | 99.40  | S |
| ATOM | 1082 | C   | CYS | 140 | -43.704 | 57.020 | 9.254  | 1.00 | 99.40  | C |
| ATOM | 1083 | O   | CYS | 140 | -43.466 | 58.223 | 9.179  | 1.00 | 99.40  | O |
| ATOM | 1084 | N   | ASP | 141 | -43.527 | 56.179 | 8.213  | 1.00 | 98.78  | N |
| ATOM | 1085 | CA  | ASP | 141 | -43.210 | 56.593 | 6.870  | 1.00 | 98.78  | C |
| ATOM | 1086 | CB  | ASP | 141 | -42.747 | 55.432 | 5.972  | 1.00 | 98.78  | C |
| ATOM | 1087 | CG  | ASP | 141 | -41.465 | 54.829 | 6.513  | 1.00 | 98.78  | C |
| ATOM | 1088 | OD1 | ASP | 141 | -41.088 | 55.173 | 7.662  | 1.00 | 98.78  | O |
| ATOM | 1089 | OD2 | ASP | 141 | -40.848 | 54.008 | 5.783  | 1.00 | 98.78  | O |
| ATOM | 1090 | C   | ASP | 141 | -44.429 | 57.119 | 6.170  | 1.00 | 98.78  | C |
| ATOM | 1091 | O   | ASP | 141 | -44.346 | 58.049 | 5.371  | 1.00 | 98.78  | O |
| ATOM | 1092 | N   | THR | 142 | -45.596 | 56.483 | 6.411  | 1.00 | 86.71  | N |
| ATOM | 1093 | CA  | THR | 142 | -46.799 | 56.843 | 5.708  | 1.00 | 86.71  | C |
| ATOM | 1094 | CB  | THR | 142 | -47.229 | 55.785 | 4.733  | 1.00 | 86.71  | C |
| ATOM | 1095 | OG1 | THR | 142 | -46.193 | 55.547 | 3.791  | 1.00 | 86.71  | O |
| ATOM | 1096 | CG2 | THR | 142 | -48.501 | 56.252 | 4.007  | 1.00 | 86.71  | C |
| ATOM | 1097 | C   | THR | 142 | -47.901 | 57.022 | 6.713  | 1.00 | 86.71  | C |
| ATOM | 1098 | O   | THR | 142 | -48.080 | 56.199 | 7.610  | 1.00 | 86.71  | O |
| ATOM | 1099 | N   | LEU | 143 | -48.693 | 58.105 | 6.564  | 1.00 | 169.26 | N |
| ATOM | 1100 | CA  | LEU | 143 | -49.692 | 58.428 | 7.548  | 1.00 | 169.26 | C |
| ATOM | 1101 | CB  | LEU | 143 | -49.419 | 59.827 | 8.140  | 1.00 | 169.26 | C |
| ATOM | 1102 | CG  | LEU | 143 | -50.161 | 60.209 | 9.434  | 1.00 | 169.26 | C |
| ATOM | 1103 | CD1 | LEU | 143 | -51.680 | 60.065 | 9.314  | 1.00 | 169.26 | C |
| ATOM | 1104 | CD2 | LEU | 143 | -49.561 | 59.499 | 10.651 | 1.00 | 169.26 | C |
| ATOM | 1105 | C   | LEU | 143 | -51.029 | 58.497 | 6.858  | 1.00 | 169.26 | C |
| ATOM | 1106 | O   | LEU | 143 | -51.181 | 59.230 | 5.880  | 1.00 | 169.26 | O |
| ATOM | 1107 | N   | LEU | 144 | -52.044 | 57.744 | 7.349  | 1.00 | 126.43 | N |
| ATOM | 1108 | CA  | LEU | 144 | -53.333 | 57.789 | 6.710  | 1.00 | 126.43 | C |
| ATOM | 1109 | CB  | LEU | 144 | -53.734 | 56.471 | 6.031  | 1.00 | 126.43 | C |
| ATOM | 1110 | CG  | LEU | 144 | -52.683 | 56.012 | 5.008  | 1.00 | 126.43 | C |
| ATOM | 1111 | CD1 | LEU | 144 | -51.441 | 55.462 | 5.717  | 1.00 | 126.43 | C |
| ATOM | 1112 | CD2 | LEU | 144 | -53.261 | 55.043 | 3.976  | 1.00 | 126.43 | C |
| ATOM | 1113 | C   | LEU | 144 | -54.388 | 58.119 | 7.726  | 1.00 | 126.43 | C |
| ATOM | 1114 | O   | LEU | 144 | -54.325 | 57.673 | 8.871  | 1.00 | 126.43 | O |
| ATOM | 1115 | N   | CYS | 145 | -55.389 | 58.941 | 7.333  | 1.00 | 82.52  | N |
| ATOM | 1116 | CA  | CYS | 145 | -56.441 | 59.292 | 8.253  | 1.00 | 82.52  | C |
| ATOM | 1117 | CB  | CYS | 145 | -56.129 | 60.581 | 9.033  | 1.00 | 82.52  | C |
| ATOM | 1118 | SG  | CYS | 145 | -57.438 | 61.041 | 10.205 | 1.00 | 82.52  | S |
| ATOM | 1119 | C   | CYS | 145 | -57.729 | 59.530 | 7.507  | 1.00 | 82.52  | C |
| ATOM | 1120 | O   | CYS | 145 | -57.827 | 60.443 | 6.691  | 1.00 | 82.52  | O |
| ATOM | 1121 | N   | ASP | 146 | -58.713 | 58.632 | 7.712  | 1.00 | 135.13 | N |
| ATOM | 1122 | CA  | ASP | 146 | -60.062 | 58.621 | 7.193  | 1.00 | 135.13 | C |
| ATOM | 1123 | CB  | ASP | 146 | -60.561 | 57.211 | 6.847  | 1.00 | 135.13 | C |
| ATOM | 1124 | CG  | ASP | 146 | -61.670 | 57.376 | 5.816  | 1.00 | 135.13 | C |
| ATOM | 1125 | OD1 | ASP | 146 | -61.856 | 58.526 | 5.334  | 1.00 | 135.13 | O |
| ATOM | 1126 | OD2 | ASP | 146 | -62.338 | 56.359 | 5.490  | 1.00 | 135.13 | O |

|      |      |     |     |     |         |        |        |            |   |
|------|------|-----|-----|-----|---------|--------|--------|------------|---|
| ATOM | 1127 | C   | ASP | 146 | -61.086 | 59.252 | 8.116  | 1.00135.13 | C |
| ATOM | 1128 | O   | ASP | 146 | -62.279 | 59.097 | 7.864  | 1.00135.13 | O |
| ATOM | 1129 | N   | ILE | 147 | -60.685 | 59.823 | 9.275  | 1.00152.42 | N |
| ATOM | 1130 | CA  | ILE | 147 | -61.606 | 60.284 | 10.296 | 1.00152.42 | C |
| ATOM | 1131 | CB  | ILE | 147 | -60.906 | 60.620 | 11.585 | 1.00152.42 | C |
| ATOM | 1132 | CG1 | ILE | 147 | -60.127 | 59.415 | 12.143 | 1.00152.42 | C |
| ATOM | 1133 | CG2 | ILE | 147 | -61.957 | 61.176 | 12.561 | 1.00152.42 | C |
| ATOM | 1134 | CD1 | ILE | 147 | -61.003 | 58.246 | 12.580 | 1.00152.42 | C |
| ATOM | 1135 | C   | ILE | 147 | -62.341 | 61.544 | 9.919  | 1.00152.42 | C |
| ATOM | 1136 | O   | ILE | 147 | -61.745 | 62.521 | 9.467  | 1.00152.42 | O |
| ATOM | 1137 | N   | GLY | 148 | -63.681 | 61.547 | 10.127 | 1.0096.49  | N |
| ATOM | 1138 | CA  | GLY | 148 | -64.496 | 62.712 | 9.909  | 1.0096.49  | C |
| ATOM | 1139 | C   | GLY | 148 | -65.932 | 62.281 | 9.940  | 1.0096.49  | C |
| ATOM | 1140 | O   | GLY | 148 | -66.377 | 61.522 | 9.082  | 1.0096.49  | O |
| ATOM | 1141 | N   | GLU | 149 | -66.711 | 62.793 | 10.918 | 1.0058.55  | N |
| ATOM | 1142 | CA  | GLU | 149 | -68.096 | 62.422 | 11.008 | 1.0058.55  | C |
| ATOM | 1143 | CB  | GLU | 149 | -68.577 | 62.138 | 12.443 | 1.0058.55  | C |
| ATOM | 1144 | CG  | GLU | 149 | -70.027 | 61.651 | 12.515 | 1.0058.55  | C |
| ATOM | 1145 | CD  | GLU | 149 | -70.415 | 61.492 | 13.979 | 1.0058.55  | C |
| ATOM | 1146 | OE1 | GLU | 149 | -69.611 | 61.907 | 14.856 | 1.0058.55  | O |
| ATOM | 1147 | OE2 | GLU | 149 | -71.525 | 60.957 | 14.242 | 1.0058.55  | O |
| ATOM | 1148 | C   | GLU | 149 | -68.899 | 63.569 | 10.493 | 1.0058.55  | C |
| ATOM | 1149 | O   | GLU | 149 | -68.753 | 64.700 | 10.951 | 1.0058.55  | O |
| ATOM | 1150 | N   | SER | 150 | -69.794 | 63.285 | 9.530  | 1.0078.69  | N |
| ATOM | 1151 | CA  | SER | 150 | -70.570 | 64.310 | 8.900  | 1.0078.69  | C |
| ATOM | 1152 | CB  | SER | 150 | -71.264 | 63.813 | 7.619  | 1.0078.69  | C |
| ATOM | 1153 | OG  | SER | 150 | -71.924 | 64.882 | 6.959  | 1.0078.69  | O |
| ATOM | 1154 | C   | SER | 150 | -71.611 | 64.795 | 9.859  | 1.0078.69  | C |
| ATOM | 1155 | O   | SER | 150 | -71.894 | 64.153 | 10.869 | 1.0078.69  | O |
| ATOM | 1156 | N   | SER | 151 | -72.176 | 65.987 | 9.581  | 1.0045.90  | N |
| ATOM | 1157 | CA  | SER | 151 | -73.193 | 66.551 | 10.422 | 1.0045.90  | C |
| ATOM | 1158 | CB  | SER | 151 | -72.618 | 67.265 | 11.652 | 1.0045.90  | C |
| ATOM | 1159 | OG  | SER | 151 | -73.661 | 67.810 | 12.445 | 1.0045.90  | O |
| ATOM | 1160 | C   | SER | 151 | -73.932 | 67.564 | 9.601  | 1.0045.90  | C |
| ATOM | 1161 | O   | SER | 151 | -73.384 | 68.137 | 8.662  | 1.0045.90  | O |
| ATOM | 1162 | N   | SER | 152 | -75.208 | 67.815 | 9.949  | 1.0077.71  | N |
| ATOM | 1163 | CA  | SER | 152 | -76.035 | 68.722 | 9.203  | 1.0077.71  | C |
| ATOM | 1164 | CB  | SER | 152 | -77.496 | 68.742 | 9.684  | 1.0077.71  | C |
| ATOM | 1165 | OG  | SER | 152 | -78.111 | 67.487 | 9.432  | 1.0077.71  | O |
| ATOM | 1166 | C   | SER | 152 | -75.512 | 70.118 | 9.339  | 1.0077.71  | C |
| ATOM | 1167 | O   | SER | 152 | -75.715 | 70.946 | 8.451  | 1.0077.71  | O |
| ATOM | 1168 | N   | SER | 153 | -74.819 | 70.418 | 10.454 | 1.0053.14  | N |
| ATOM | 1169 | CA  | SER | 153 | -74.343 | 71.754 | 10.682 | 1.0053.14  | C |
| ATOM | 1170 | CB  | SER | 153 | -74.294 | 72.122 | 12.177 | 1.0053.14  | C |
| ATOM | 1171 | OG  | SER | 153 | -73.738 | 73.417 | 12.351 | 1.0053.14  | O |
| ATOM | 1172 | C   | SER | 153 | -72.942 | 71.870 | 10.170 | 1.0053.14  | C |
| ATOM | 1173 | O   | SER | 153 | -72.058 | 71.103 | 10.547 | 1.0053.14  | O |
| ATOM | 1174 | N   | PRO | 154 | -72.728 | 72.823 | 9.302  | 1.00133.23 | N |
| ATOM | 1175 | CA  | PRO | 154 | -71.417 | 73.060 | 8.768  | 1.00133.23 | C |
| ATOM | 1176 | CD  | PRO | 154 | -73.776 | 73.260 | 8.394  | 1.00133.23 | C |
| ATOM | 1177 | CB  | PRO | 154 | -71.610 | 74.051 | 7.622  | 1.00133.23 | C |
| ATOM | 1178 | CG  | PRO | 154 | -73.046 | 73.775 | 7.142  | 1.00133.23 | C |
| ATOM | 1179 | C   | PRO | 154 | -70.507 | 73.566 | 9.835  | 1.00133.23 | C |
| ATOM | 1180 | O   | PRO | 154 | -69.295 | 73.401 | 9.719  | 1.00133.23 | O |
| ATOM | 1181 | N   | GLU | 155 | -71.073 | 74.217 | 10.864 | 1.00106.04 | N |
| ATOM | 1182 | CA  | GLU | 155 | -70.284 | 74.764 | 11.924 | 1.00106.04 | C |
| ATOM | 1183 | CB  | GLU | 155 | -71.126 | 75.589 | 12.911 | 1.00106.04 | C |
| ATOM | 1184 | CG  | GLU | 155 | -70.288 | 76.386 | 13.909 | 1.00106.04 | C |
| ATOM | 1185 | CD  | GLU | 155 | -69.660 | 77.550 | 13.156 | 1.00106.04 | C |
| ATOM | 1186 | OE1 | GLU | 155 | -69.796 | 77.588 | 11.903 | 1.00106.04 | O |
| ATOM | 1187 | OE2 | GLU | 155 | -69.037 | 78.417 | 13.823 | 1.00106.04 | O |
| ATOM | 1188 | C   | GLU | 155 | -69.665 | 73.639 | 12.680 | 1.00106.04 | C |
| ATOM | 1189 | O   | GLU | 155 | -68.506 | 73.713 | 13.086 | 1.00106.04 | O |
| ATOM | 1190 | N   | VAL | 156 | -70.444 | 72.565 | 12.908 | 1.00103.78 | N |
| ATOM | 1191 | CA  | VAL | 156 | -69.939 | 71.456 | 13.658 | 1.00103.78 | C |
| ATOM | 1192 | CB  | VAL | 156 | -70.991 | 70.466 | 14.060 | 1.00103.78 | C |

|      |      |         |     |         |        |        |            |   |
|------|------|---------|-----|---------|--------|--------|------------|---|
| ATOM | 1193 | CG1 VAL | 156 | -71.455 | 69.696 | 12.823 | 1.00103.78 | C |
| ATOM | 1194 | CG2 VAL | 156 | -70.408 | 69.572 | 15.160 | 1.00103.78 | C |
| ATOM | 1195 | C VAL   | 156 | -68.882 | 70.748 | 12.869 | 1.00103.78 | C |
| ATOM | 1196 | O VAL   | 156 | -67.857 | 70.346 | 13.419 | 1.00103.78 | O |
| ATOM | 1197 | N GLU   | 157 | -69.097 | 70.582 | 11.549 | 1.00 51.96 | N |
| ATOM | 1198 | CA GLU  | 157 | -68.157 | 69.873 | 10.729 | 1.00 51.96 | C |
| ATOM | 1199 | CB GLU  | 157 | -68.635 | 69.670 | 9.279  | 1.00 51.96 | C |
| ATOM | 1200 | CG GLU  | 157 | -69.800 | 68.682 | 9.175  | 1.00 51.96 | C |
| ATOM | 1201 | CD GLU  | 157 | -70.174 | 68.512 | 7.708  | 1.00 51.96 | C |
| ATOM | 1202 | OE1 GLU | 157 | -69.581 | 69.223 | 6.854  | 1.00 51.96 | O |
| ATOM | 1203 | OE2 GLU | 157 | -71.058 | 67.661 | 7.423  | 1.00 51.96 | O |
| ATOM | 1204 | C GLU   | 157 | -66.873 | 70.636 | 10.706 | 1.00 51.96 | C |
| ATOM | 1205 | O GLU   | 157 | -65.796 | 70.041 | 10.660 | 1.00 51.96 | O |
| ATOM | 1206 | N GLU   | 158 | -66.945 | 71.981 | 10.724 | 1.00 89.32 | N |
| ATOM | 1207 | CA GLU  | 158 | -65.726 | 72.732 | 10.669 | 1.00 89.32 | C |
| ATOM | 1208 | CB GLU  | 158 | -65.892 | 74.260 | 10.544 | 1.00 89.32 | C |
| ATOM | 1209 | CG GLU  | 158 | -66.346 | 74.983 | 11.812 | 1.00 89.32 | C |
| ATOM | 1210 | CD GLU  | 158 | -66.128 | 76.473 | 11.579 | 1.00 89.32 | C |
| ATOM | 1211 | OE1 GLU | 158 | -66.668 | 77.002 | 10.571 | 1.00 89.32 | O |
| ATOM | 1212 | OE2 GLU | 158 | -65.407 | 77.101 | 12.400 | 1.00 89.32 | O |
| ATOM | 1213 | C GLU   | 158 | -64.914 | 72.472 | 11.899 | 1.00 89.32 | C |
| ATOM | 1214 | O GLU   | 158 | -63.696 | 72.334 | 11.819 | 1.00 89.32 | O |
| ATOM | 1215 | N THR   | 159 | -65.559 | 72.403 | 13.079 | 1.00101.09 | N |
| ATOM | 1216 | CA THR  | 159 | -64.819 | 72.193 | 14.292 | 1.00101.09 | C |
| ATOM | 1217 | CB THR  | 159 | -65.673 | 72.263 | 15.526 | 1.00101.09 | C |
| ATOM | 1218 | OG1 THR | 159 | -66.638 | 71.221 | 15.518 | 1.00101.09 | O |
| ATOM | 1219 | CG2 THR | 159 | -66.370 | 73.633 | 15.567 | 1.00101.09 | C |
| ATOM | 1220 | C THR   | 159 | -64.201 | 70.832 | 14.260 | 1.00101.09 | C |
| ATOM | 1221 | O THR   | 159 | -63.054 | 70.646 | 14.662 | 1.00101.09 | O |
| ATOM | 1222 | N ARG   | 160 | -64.970 | 69.842 | 13.779 | 1.00154.00 | N |
| ATOM | 1223 | CA ARG  | 160 | -64.561 | 68.470 | 13.756 | 1.00154.00 | C |
| ATOM | 1224 | CB ARG  | 160 | -65.723 | 67.585 | 13.276 | 1.00154.00 | C |
| ATOM | 1225 | CG ARG  | 160 | -65.654 | 66.127 | 13.719 | 1.00154.00 | C |
| ATOM | 1226 | CD ARG  | 160 | -67.002 | 65.412 | 13.580 | 1.00154.00 | C |
| ATOM | 1227 | NE ARG  | 160 | -67.968 | 66.104 | 14.483 | 1.00154.00 | N |
| ATOM | 1228 | CZ ARG  | 160 | -69.288 | 65.753 | 14.476 | 1.00154.00 | C |
| ATOM | 1229 | NH1 ARG | 160 | -69.731 | 64.776 | 13.635 | 1.00154.00 | N |
| ATOM | 1230 | NH2 ARG | 160 | -70.168 | 66.375 | 15.314 | 1.00154.00 | N |
| ATOM | 1231 | C ARG   | 160 | -63.387 | 68.318 | 12.836 | 1.00154.00 | C |
| ATOM | 1232 | O ARG   | 160 | -62.429 | 67.608 | 13.139 | 1.00154.00 | O |
| ATOM | 1233 | N THR   | 161 | -63.433 | 68.990 | 11.674 | 1.00141.07 | N |
| ATOM | 1234 | CA THR  | 161 | -62.373 | 68.875 | 10.721 | 1.00141.07 | C |
| ATOM | 1235 | CB THR  | 161 | -62.776 | 69.429 | 9.387  | 1.00141.07 | C |
| ATOM | 1236 | OG1 THR | 161 | -61.748 | 69.251 | 8.430  | 1.00141.07 | O |
| ATOM | 1237 | CG2 THR | 161 | -63.147 | 70.901 | 9.547  | 1.00141.07 | C |
| ATOM | 1238 | C THR   | 161 | -61.116 | 69.505 | 11.259 | 1.00141.07 | C |
| ATOM | 1239 | O THR   | 161 | -60.031 | 68.943 | 11.120 | 1.00141.07 | O |
| ATOM | 1240 | N LEU   | 162 | -61.229 | 70.666 | 11.934 | 1.00136.95 | N |
| ATOM | 1241 | CA LEU  | 162 | -60.096 | 71.380 | 12.457 | 1.00136.95 | C |
| ATOM | 1242 | CB LEU  | 162 | -60.528 | 72.724 | 13.080 | 1.00136.95 | C |
| ATOM | 1243 | CG LEU  | 162 | -59.381 | 73.644 | 13.538 | 1.00136.95 | C |
| ATOM | 1244 | CD1 LEU | 162 | -58.657 | 73.081 | 14.767 | 1.00136.95 | C |
| ATOM | 1245 | CD2 LEU | 162 | -58.429 | 73.969 | 12.376 | 1.00136.95 | C |
| ATOM | 1246 | C LEU   | 162 | -59.414 | 70.529 | 13.493 | 1.00136.95 | C |
| ATOM | 1247 | O LEU   | 162 | -58.185 | 70.499 | 13.566 | 1.00136.95 | O |
| ATOM | 1248 | N ARG   | 163 | -60.193 | 69.799 | 14.318 | 1.00179.49 | N |
| ATOM | 1249 | CA ARG  | 163 | -59.613 | 68.976 | 15.347 | 1.00179.49 | C |
| ATOM | 1250 | CB ARG  | 163 | -60.626 | 68.164 | 16.169 | 1.00179.49 | C |
| ATOM | 1251 | CG ARG  | 163 | -61.273 | 68.897 | 17.338 | 1.00179.49 | C |
| ATOM | 1252 | CD ARG  | 163 | -62.094 | 67.962 | 18.231 | 1.00179.49 | C |
| ATOM | 1253 | NE ARG  | 163 | -61.186 | 66.883 | 18.716 | 1.00179.49 | N |
| ATOM | 1254 | CZ ARG  | 163 | -60.451 | 67.061 | 19.853 | 1.00179.49 | C |
| ATOM | 1255 | NH1 ARG | 163 | -60.544 | 68.230 | 20.549 | 1.00179.49 | N |
| ATOM | 1256 | NH2 ARG | 163 | -59.626 | 66.069 | 20.299 | 1.00179.49 | N |
| ATOM | 1257 | C ARG   | 163 | -58.743 | 67.941 | 14.717 | 1.00179.49 | C |
| ATOM | 1258 | O ARG   | 163 | -57.666 | 67.635 | 15.226 | 1.00179.49 | O |

|      |      |     |     |     |         |        |        |            |       |   |
|------|------|-----|-----|-----|---------|--------|--------|------------|-------|---|
| ATOM | 1259 | N   | VAL | 164 | -59.212 | 67.342 | 13.608 | 1.00       | 50.40 | N |
| ATOM | 1260 | CA  | VAL | 164 | -58.470 | 66.302 | 12.961 | 1.00       | 50.40 | C |
| ATOM | 1261 | CB  | VAL | 164 | -59.210 | 65.684 | 11.811 | 1.00       | 50.40 | C |
| ATOM | 1262 | CG1 | VAL | 164 | -58.271 | 64.688 | 11.106 | 1.00       | 50.40 | C |
| ATOM | 1263 | CG2 | VAL | 164 | -60.502 | 65.046 | 12.351 | 1.00       | 50.40 | C |
| ATOM | 1264 | C   | VAL | 164 | -57.182 | 66.849 | 12.428 | 1.00       | 50.40 | C |
| ATOM | 1265 | O   | VAL | 164 | -56.127 | 66.249 | 12.623 | 1.00       | 50.40 | O |
| ATOM | 1266 | N   | LEU | 165 | -57.223 | 68.019 | 11.761 | 1.00110.46 | N     |   |
| ATOM | 1267 | CA  | LEU | 165 | -56.027 | 68.562 | 11.183 | 1.00110.46 | C     |   |
| ATOM | 1268 | CB  | LEU | 165 | -56.230 | 69.840 | 10.351 | 1.00110.46 | C     |   |
| ATOM | 1269 | CG  | LEU | 165 | -56.836 | 69.591 | 8.955  | 1.00110.46 | C     |   |
| ATOM | 1270 | CD1 | LEU | 165 | -58.309 | 69.175 | 9.008  | 1.00110.46 | C     |   |
| ATOM | 1271 | CD2 | LEU | 165 | -56.587 | 70.785 | 8.030  | 1.00110.46 | C     |   |
| ATOM | 1272 | C   | LEU | 165 | -55.037 | 68.859 | 12.258 | 1.00110.46 | C     |   |
| ATOM | 1273 | O   | LEU | 165 | -53.839 | 68.653 | 12.072 | 1.00110.46 | O     |   |
| ATOM | 1274 | N   | SER | 166 | -55.497 | 69.365 | 13.413 | 1.00       | 72.08 | N |
| ATOM | 1275 | CA  | SER | 166 | -54.574 | 69.663 | 14.467 | 1.00       | 72.08 | C |
| ATOM | 1276 | CB  | SER | 166 | -55.244 | 70.331 | 15.679 | 1.00       | 72.08 | C |
| ATOM | 1277 | OG  | SER | 166 | -54.277 | 70.597 | 16.685 | 1.00       | 72.08 | O |
| ATOM | 1278 | C   | SER | 166 | -53.948 | 68.379 | 14.937 | 1.00       | 72.08 | C |
| ATOM | 1279 | O   | SER | 166 | -52.766 | 68.348 | 15.273 | 1.00       | 72.08 | O |
| ATOM | 1280 | N   | MET | 167 | -54.737 | 67.288 | 14.995 | 1.00127.09 | N     |   |
| ATOM | 1281 | CA  | MET | 167 | -54.268 | 66.009 | 15.468 | 1.00127.09 | C     |   |
| ATOM | 1282 | CB  | MET | 167 | -55.405 | 64.976 | 15.578 | 1.00127.09 | C     |   |
| ATOM | 1283 | CG  | MET | 167 | -54.928 | 63.613 | 16.080 | 1.00127.09 | C     |   |
| ATOM | 1284 | SD  | MET | 167 | -56.214 | 62.336 | 16.165 | 1.00127.09 | S     |   |
| ATOM | 1285 | CE  | MET | 167 | -56.502 | 62.232 | 14.374 | 1.00127.09 | C     |   |
| ATOM | 1286 | C   | MET | 167 | -53.239 | 65.406 | 14.552 | 1.00127.09 | C     |   |
| ATOM | 1287 | O   | MET | 167 | -52.211 | 64.900 | 15.002 | 1.00127.09 | O     |   |
| ATOM | 1288 | N   | VAL | 168 | -53.497 | 65.455 | 13.232 | 1.00143.11 | N     |   |
| ATOM | 1289 | CA  | VAL | 168 | -52.688 | 64.824 | 12.223 | 1.00143.11 | C     |   |
| ATOM | 1290 | CB  | VAL | 168 | -53.290 | 64.959 | 10.857 | 1.00143.11 | C     |   |
| ATOM | 1291 | CG1 | VAL | 168 | -52.377 | 64.243 | 9.857  | 1.00143.11 | C     |   |
| ATOM | 1292 | CG2 | VAL | 168 | -54.744 | 64.470 | 10.880 | 1.00143.11 | C     |   |
| ATOM | 1293 | C   | VAL | 168 | -51.346 | 65.493 | 12.145 | 1.00143.11 | C     |   |
| ATOM | 1294 | O   | VAL | 168 | -50.348 | 64.864 | 11.796 | 1.00143.11 | O     |   |
| ATOM | 1295 | N   | GLY | 169 | -51.303 | 66.805 | 12.440 | 1.00       | 39.71 | N |
| ATOM | 1296 | CA  | GLY | 169 | -50.110 | 67.586 | 12.294 | 1.00       | 39.71 | C |
| ATOM | 1297 | C   | GLY | 169 | -49.008 | 67.028 | 13.140 | 1.00       | 39.71 | C |
| ATOM | 1298 | O   | GLY | 169 | -47.854 | 67.001 | 12.713 | 1.00       | 39.71 | O |
| ATOM | 1299 | N   | ASP | 170 | -49.323 | 66.575 | 14.367 | 1.00       | 49.24 | N |
| ATOM | 1300 | CA  | ASP | 170 | -48.293 | 66.073 | 15.231 | 1.00       | 49.24 | C |
| ATOM | 1301 | CB  | ASP | 170 | -48.822 | 65.658 | 16.614 | 1.00       | 49.24 | C |
| ATOM | 1302 | CG  | ASP | 170 | -49.251 | 66.926 | 17.340 | 1.00       | 49.24 | C |
| ATOM | 1303 | OD1 | ASP | 170 | -49.142 | 68.021 | 16.728 | 1.00       | 49.24 | O |
| ATOM | 1304 | OD2 | ASP | 170 | -49.688 | 66.816 | 18.517 | 1.00       | 49.24 | O |
| ATOM | 1305 | C   | ASP | 170 | -47.666 | 64.867 | 14.596 | 1.00       | 49.24 | C |
| ATOM | 1306 | O   | ASP | 170 | -46.459 | 64.660 | 14.705 | 1.00       | 49.24 | O |
| ATOM | 1307 | N   | TRP | 171 | -48.482 | 64.025 | 13.934 | 1.00       | 99.04 | N |
| ATOM | 1308 | CA  | TRP | 171 | -48.013 | 62.827 | 13.285 | 1.00       | 99.04 | C |
| ATOM | 1309 | CB  | TRP | 171 | -49.183 | 61.970 | 12.774 | 1.00       | 99.04 | C |
| ATOM | 1310 | CG  | TRP | 171 | -50.070 | 61.470 | 13.893 | 1.00       | 99.04 | C |
| ATOM | 1311 | CD2 | TRP | 171 | -49.987 | 60.165 | 14.486 | 1.00       | 99.04 | C |
| ATOM | 1312 | CD1 | TRP | 171 | -51.083 | 62.121 | 14.535 | 1.00       | 99.04 | C |
| ATOM | 1313 | NE1 | TRP | 171 | -51.630 | 61.308 | 15.496 | 1.00       | 99.04 | N |
| ATOM | 1314 | CE2 | TRP | 171 | -50.967 | 60.100 | 15.476 | 1.00       | 99.04 | C |
| ATOM | 1315 | CE3 | TRP | 171 | -49.162 | 59.107 | 14.229 | 1.00       | 99.04 | C |
| ATOM | 1316 | CZ2 | TRP | 171 | -51.138 | 58.973 | 16.227 | 1.00       | 99.04 | C |
| ATOM | 1317 | CZ3 | TRP | 171 | -49.337 | 57.972 | 14.988 | 1.00       | 99.04 | C |
| ATOM | 1318 | CH2 | TRP | 171 | -50.306 | 57.906 | 15.968 | 1.00       | 99.04 | C |
| ATOM | 1319 | C   | TRP | 171 | -47.129 | 63.177 | 12.120 | 1.00       | 99.04 | C |
| ATOM | 1320 | O   | TRP | 171 | -46.124 | 62.514 | 11.870 | 1.00       | 99.04 | O |
| ATOM | 1321 | N   | LEU | 172 | -47.500 | 64.214 | 11.350 | 1.00139.89 | N     |   |
| ATOM | 1322 | CA  | LEU | 172 | -46.737 | 64.637 | 10.206 | 1.00139.89 | C     |   |
| ATOM | 1323 | CB  | LEU | 172 | -47.480 | 65.712 | 9.394  | 1.00139.89 | C     |   |
| ATOM | 1324 | CG  | LEU | 172 | -48.848 | 65.213 | 8.878  | 1.00139.89 | C     |   |

|      |      |         |     |         |        |        |            |   |
|------|------|---------|-----|---------|--------|--------|------------|---|
| ATOM | 1325 | CD1 LEU | 172 | -49.577 | 66.284 | 8.052  | 1.00139.89 | C |
| ATOM | 1326 | CD2 LEU | 172 | -48.714 | 63.877 | 8.131  | 1.00139.89 | C |
| ATOM | 1327 | C LEU   | 172 | -45.426 | 65.191 | 10.692 | 1.00139.89 | C |
| ATOM | 1328 | O LEU   | 172 | -44.406 | 65.090 | 10.010 | 1.00139.89 | O |
| ATOM | 1329 | N GLU   | 173 | -45.424 | 65.766 | 11.912 | 1.00175.54 | N |
| ATOM | 1330 | CA GLU  | 173 | -44.278 | 66.401 | 12.504 | 1.00175.54 | C |
| ATOM | 1331 | CB GLU  | 173 | -44.519 | 66.869 | 13.949 | 1.00175.54 | C |
| ATOM | 1332 | CG GLU  | 173 | -45.506 | 68.028 | 14.076 | 1.00175.54 | C |
| ATOM | 1333 | CD GLU  | 173 | -45.625 | 68.360 | 15.557 | 1.00175.54 | C |
| ATOM | 1334 | OE1 GLU | 173 | -45.005 | 67.631 | 16.375 | 1.00175.54 | O |
| ATOM | 1335 | OE2 GLU | 173 | -46.338 | 69.345 | 15.888 | 1.00175.54 | O |
| ATOM | 1336 | C GLU   | 173 | -43.164 | 65.417 | 12.548 | 1.00175.54 | C |
| ATOM | 1337 | O GLU   | 173 | -41.994 | 65.796 | 12.507 | 1.00175.54 | O |
| ATOM | 1338 | N LYS   | 174 | -43.475 | 64.116 | 12.681 | 1.00388.59 | N |
| ATOM | 1339 | CA LYS  | 174 | -42.371 | 63.219 | 12.587 | 1.00388.59 | C |
| ATOM | 1340 | CB LYS  | 174 | -42.535 | 61.861 | 13.309 | 1.00388.59 | C |
| ATOM | 1341 | CG LYS  | 174 | -43.908 | 61.192 | 13.277 | 1.00388.59 | C |
| ATOM | 1342 | CD LYS  | 174 | -44.230 | 60.528 | 11.949 | 1.00388.59 | C |
| ATOM | 1343 | CE LYS  | 174 | -45.315 | 59.460 | 12.024 | 1.00388.59 | C |
| ATOM | 1344 | NZ LYS  | 174 | -46.551 | 59.976 | 12.653 | 1.00388.59 | N |
| ATOM | 1345 | C LYS   | 174 | -42.025 | 63.142 | 11.117 | 1.00388.59 | C |
| ATOM | 1346 | O LYS   | 174 | -42.094 | 64.127 | 10.394 | 1.00388.59 | O |
| ATOM | 1347 | N ARG   | 175 | -41.541 | 62.007 | 10.632 | 1.00284.66 | N |
| ATOM | 1348 | CA ARG  | 175 | -41.048 | 61.853 | 9.288  | 1.00284.66 | C |
| ATOM | 1349 | CB ARG  | 175 | -40.018 | 60.711 | 9.143  | 1.00284.66 | C |
| ATOM | 1350 | CG ARG  | 175 | -40.527 | 59.310 | 9.497  | 1.00284.66 | C |
| ATOM | 1351 | CD ARG  | 175 | -39.452 | 58.229 | 9.331  | 1.00284.66 | C |
| ATOM | 1352 | NE ARG  | 175 | -40.051 | 56.921 | 9.722  | 1.00284.66 | N |
| ATOM | 1353 | NZ ARG  | 175 | -39.309 | 55.776 | 9.655  | 1.00284.66 | C |
| ATOM | 1354 | NH1 ARG | 175 | -38.019 | 55.817 | 9.209  | 1.00284.66 | N |
| ATOM | 1355 | NH2 ARG | 175 | -39.866 | 54.584 | 10.016 | 1.00284.66 | N |
| ATOM | 1356 | C ARG   | 175 | -42.026 | 61.704 | 8.143  | 1.00284.66 | C |
| ATOM | 1357 | O ARG   | 175 | -41.575 | 61.957 | 7.027  | 1.00284.66 | O |
| ATOM | 1358 | N PRO   | 176 | -43.275 | 61.298 | 8.287  | 1.00221.50 | N |
| ATOM | 1359 | CA PRO  | 176 | -44.078 | 60.857 | 7.157  | 1.00221.50 | C |
| ATOM | 1360 | CD PRO  | 176 | -44.116 | 61.929 | 9.287  | 1.00221.50 | C |
| ATOM | 1361 | CB PRO  | 176 | -45.508 | 60.769 | 7.678  | 1.00221.50 | C |
| ATOM | 1362 | CG PRO  | 176 | -45.547 | 61.893 | 8.725  | 1.00221.50 | C |
| ATOM | 1363 | C PRO   | 176 | -44.033 | 61.690 | 5.915  | 1.00221.50 | C |
| ATOM | 1364 | O PRO   | 176 | -44.648 | 62.755 | 5.860  | 1.00221.50 | O |
| ATOM | 1365 | N GLY   | 177 | -43.300 | 61.181 | 4.908  | 1.00155.82 | N |
| ATOM | 1366 | CA GLY  | 177 | -43.169 | 61.761 | 3.618  | 1.00155.82 | C |
| ATOM | 1367 | C GLY   | 177 | -44.458 | 61.613 | 2.882  | 1.00155.82 | C |
| ATOM | 1368 | O GLY   | 177 | -44.857 | 62.497 | 2.126  | 1.00155.82 | O |
| ATOM | 1369 | N ALA   | 178 | -45.129 | 60.459 | 3.066  | 1.00 53.78 | N |
| ATOM | 1370 | CA ALA  | 178 | -46.332 | 60.212 | 2.332  | 1.00 53.78 | C |
| ATOM | 1371 | CB ALA  | 178 | -46.355 | 58.836 | 1.642  | 1.00 53.78 | C |
| ATOM | 1372 | C ALA   | 178 | -47.499 | 60.261 | 3.267  | 1.00 53.78 | C |
| ATOM | 1373 | O ALA   | 178 | -47.426 | 59.772 | 4.395  | 1.00 53.78 | O |
| ATOM | 1374 | N PHE   | 179 | -48.611 | 60.890 | 2.822  | 1.00100.14 | N |
| ATOM | 1375 | CA PHE  | 179 | -49.773 | 60.927 | 3.659  | 1.00100.14 | C |
| ATOM | 1376 | CB PHE  | 179 | -49.719 | 61.953 | 4.813  | 1.00100.14 | C |
| ATOM | 1377 | CG PHE  | 179 | -49.496 | 63.321 | 4.270  | 1.00100.14 | C |
| ATOM | 1378 | CD1 PHE | 179 | -50.542 | 64.075 | 3.790  | 1.00100.14 | C |
| ATOM | 1379 | CD2 PHE | 179 | -48.227 | 63.853 | 4.261  | 1.00100.14 | C |
| ATOM | 1380 | CE1 PHE | 179 | -50.317 | 65.338 | 3.294  | 1.00100.14 | C |
| ATOM | 1381 | CE2 PHE | 179 | -47.997 | 65.115 | 3.767  | 1.00100.14 | C |
| ATOM | 1382 | CZ PHE  | 179 | -49.044 | 65.858 | 3.281  | 1.00100.14 | C |
| ATOM | 1383 | C PHE   | 179 | -51.003 | 61.160 | 2.840  | 1.00100.14 | C |
| ATOM | 1384 | O PHE   | 179 | -50.944 | 61.641 | 1.708  | 1.00100.14 | O |
| ATOM | 1385 | N CYS   | 180 | -52.158 | 60.760 | 3.411  | 1.00 75.03 | N |
| ATOM | 1386 | CA CYS  | 180 | -53.442 | 60.914 | 2.795  | 1.00 75.03 | C |
| ATOM | 1387 | CB CYS  | 180 | -53.891 | 59.660 | 2.022  | 1.00 75.03 | C |
| ATOM | 1388 | SG CYS  | 180 | -55.522 | 59.847 | 1.242  | 1.00 75.03 | S |
| ATOM | 1389 | C CYS   | 180 | -54.403 | 61.117 | 3.922  | 1.00 75.03 | C |
| ATOM | 1390 | O CYS   | 180 | -54.726 | 60.182 | 4.651  | 1.00 75.03 | O |

|      |      |     |     |     |         |        |       |            |   |
|------|------|-----|-----|-----|---------|--------|-------|------------|---|
| ATOM | 1391 | N   | ILE | 181 | -54.908 | 62.351 | 4.073 | 1.00208.80 | N |
| ATOM | 1392 | CA  | ILE | 181 | -55.726 | 62.675 | 5.203 | 1.00208.80 | C |
| ATOM | 1393 | CB  | ILE | 181 | -54.965 | 63.663 | 6.054 | 1.00208.80 | C |
| ATOM | 1394 | CG1 | ILE | 181 | -55.610 | 63.965 | 7.399 | 1.00208.80 | C |
| ATOM | 1395 | CG2 | ILE | 181 | -54.756 | 64.923 | 5.207 | 1.00208.80 | C |
| ATOM | 1396 | CD1 | ILE | 181 | -56.817 | 64.884 | 7.272 | 1.00208.80 | C |
| ATOM | 1397 | C   | ILE | 181 | -57.035 | 63.230 | 4.710 | 1.00208.80 | C |
| ATOM | 1398 | O   | ILE | 181 | -57.073 | 64.079 | 3.823 | 1.00208.80 | O |
| ATOM | 1399 | N   | LYS | 182 | -58.154 | 62.728 | 5.274 | 1.00 80.41 | N |
| ATOM | 1400 | CA  | LYS | 182 | -59.493 | 63.104 | 4.893 | 1.00 80.41 | C |
| ATOM | 1401 | CB  | LYS | 182 | -60.531 | 62.135 | 5.485 | 1.00 80.41 | C |
| ATOM | 1402 | CG  | LYS | 182 | -61.991 | 62.487 | 5.201 | 1.00 80.41 | C |
| ATOM | 1403 | CD  | LYS | 182 | -62.965 | 61.425 | 5.721 | 1.00 80.41 | C |
| ATOM | 1404 | CE  | LYS | 182 | -64.431 | 61.861 | 5.699 | 1.00 80.41 | C |
| ATOM | 1405 | NZ  | LYS | 182 | -65.291 | 60.775 | 6.220 | 1.00 80.41 | N |
| ATOM | 1406 | C   | LYS | 182 | -59.819 | 64.464 | 5.437 | 1.00 80.41 | C |
| ATOM | 1407 | O   | LYS | 182 | -59.592 | 64.741 | 6.613 | 1.00 80.41 | O |
| ATOM | 1408 | N   | VAL | 183 | -60.361 | 65.363 | 4.584 | 1.00 70.00 | N |
| ATOM | 1409 | CA  | VAL | 183 | -60.794 | 66.637 | 5.088 | 1.00 70.00 | C |
| ATOM | 1410 | CB  | VAL | 183 | -60.204 | 67.816 | 4.372 | 1.00 70.00 | C |
| ATOM | 1411 | CG1 | VAL | 183 | -60.756 | 69.102 | 5.013 | 1.00 70.00 | C |
| ATOM | 1412 | CG2 | VAL | 183 | -58.671 | 67.708 | 4.439 | 1.00 70.00 | C |
| ATOM | 1413 | C   | VAL | 183 | -62.281 | 66.672 | 4.913 | 1.00 70.00 | C |
| ATOM | 1414 | O   | VAL | 183 | -62.789 | 66.806 | 3.800 | 1.00 70.00 | O |
| ATOM | 1415 | N   | LEU | 184 | -63.008 | 66.566 | 6.042 | 1.00 81.37 | N |
| ATOM | 1416 | CA  | LEU | 184 | -64.440 | 66.469 | 6.075 | 1.00 81.37 | C |
| ATOM | 1417 | CB  | LEU | 184 | -64.924 | 66.342 | 7.529 | 1.00 81.37 | C |
| ATOM | 1418 | CG  | LEU | 184 | -66.445 | 66.229 | 7.711 | 1.00 81.37 | C |
| ATOM | 1419 | CD1 | LEU | 184 | -66.997 | 64.925 | 7.120 | 1.00 81.37 | C |
| ATOM | 1420 | CD2 | LEU | 184 | -66.826 | 66.428 | 9.187 | 1.00 81.37 | C |
| ATOM | 1421 | C   | LEU | 184 | -65.077 | 67.696 | 5.497 | 1.00 81.37 | C |
| ATOM | 1422 | O   | LEU | 184 | -65.854 | 67.594 | 4.546 | 1.00 81.37 | O |
| ATOM | 1423 | N   | CYS | 185 | -64.762 | 68.899 | 6.027 | 1.00150.69 | N |
| ATOM | 1424 | CA  | CYS | 185 | -65.386 | 70.045 | 5.426 | 1.00150.69 | C |
| ATOM | 1425 | CB  | CYS | 185 | -66.532 | 70.696 | 6.235 | 1.00150.69 | C |
| ATOM | 1426 | SG  | CYS | 185 | -66.066 | 71.744 | 7.638 | 1.00150.69 | S |
| ATOM | 1427 | C   | CYS | 185 | -64.333 | 71.056 | 5.056 | 1.00150.69 | C |
| ATOM | 1428 | O   | CYS | 185 | -63.832 | 71.826 | 5.873 | 1.00150.69 | O |
| ATOM | 1429 | N   | PRO | 186 | -63.955 | 71.005 | 3.805 | 1.00195.73 | N |
| ATOM | 1430 | CA  | PRO | 186 | -62.937 | 71.886 | 3.280 | 1.00195.73 | C |
| ATOM | 1431 | CD  | PRO | 186 | -64.023 | 69.754 | 3.066 | 1.00195.73 | C |
| ATOM | 1432 | CB  | PRO | 186 | -62.442 | 71.240 | 1.989 | 1.00195.73 | C |
| ATOM | 1433 | CG  | PRO | 186 | -62.797 | 69.755 | 2.142 | 1.00195.73 | C |
| ATOM | 1434 | C   | PRO | 186 | -63.379 | 73.293 | 3.007 | 1.00195.73 | C |
| ATOM | 1435 | O   | PRO | 186 | -62.530 | 74.180 | 2.938 | 1.00195.73 | O |
| ATOM | 1436 | N   | TYR | 187 | -64.688 | 73.498 | 2.784 | 1.00129.81 | N |
| ATOM | 1437 | CA  | TYR | 187 | -65.266 | 74.748 | 2.365 | 1.00129.81 | C |
| ATOM | 1438 | CB  | TYR | 187 | -66.669 | 74.606 | 1.740 | 1.00129.81 | C |
| ATOM | 1439 | CG  | TYR | 187 | -67.612 | 73.902 | 2.655 | 1.00129.81 | C |
| ATOM | 1440 | CD1 | TYR | 187 | -68.288 | 74.577 | 3.645 | 1.00129.81 | C |
| ATOM | 1441 | CD2 | TYR | 187 | -67.831 | 72.552 | 2.503 | 1.00129.81 | C |
| ATOM | 1442 | CE1 | TYR | 187 | -69.164 | 73.912 | 4.471 | 1.00129.81 | C |
| ATOM | 1443 | CE2 | TYR | 187 | -68.703 | 71.881 | 3.324 | 1.00129.81 | C |
| ATOM | 1444 | CZ  | TYR | 187 | -69.372 | 72.562 | 4.311 | 1.00129.81 | C |
| ATOM | 1445 | OH  | TYR | 187 | -70.271 | 71.876 | 5.155 | 1.00129.81 | O |
| ATOM | 1446 | C   | TYR | 187 | -65.279 | 75.820 | 3.417 | 1.00129.81 | C |
| ATOM | 1447 | O   | TYR | 187 | -65.358 | 77.002 | 3.081 | 1.00129.81 | O |
| ATOM | 1448 | N   | THR | 188 | -65.308 | 75.457 | 4.714 | 1.00120.89 | N |
| ATOM | 1449 | CA  | THR | 188 | -65.387 | 76.474 | 5.730 | 1.00120.89 | C |
| ATOM | 1450 | CB  | THR | 188 | -65.716 | 75.940 | 7.092 | 1.00120.89 | C |
| ATOM | 1451 | OG1 | THR | 188 | -64.737 | 74.998 | 7.495 | 1.00120.89 | O |
| ATOM | 1452 | CG2 | THR | 188 | -67.104 | 75.278 | 7.038 | 1.00120.89 | C |
| ATOM | 1453 | C   | THR | 188 | -64.105 | 77.251 | 5.801 | 1.00120.89 | C |
| ATOM | 1454 | O   | THR | 188 | -63.018 | 76.717 | 5.597 | 1.00120.89 | O |
| ATOM | 1455 | N   | SER | 189 | -64.228 | 78.556 | 6.126 | 1.00 46.48 | N |
| ATOM | 1456 | CA  | SER | 189 | -63.148 | 79.507 | 6.119 | 1.00 46.48 | C |

|      |      |     |     |     |         |        |        |            |       |   |
|------|------|-----|-----|-----|---------|--------|--------|------------|-------|---|
| ATOM | 1457 | CB  | SER | 189 | -63.619 | 80.929 | 6.465  | 1.00       | 46.48 | C |
| ATOM | 1458 | OG  | SER | 189 | -64.150 | 80.962 | 7.781  | 1.00       | 46.48 | O |
| ATOM | 1459 | C   | SER | 189 | -62.055 | 79.136 | 7.081  | 1.00       | 46.48 | C |
| ATOM | 1460 | O   | SER | 189 | -60.879 | 79.202 | 6.732  | 1.00       | 46.48 | O |
| ATOM | 1461 | N   | THR | 190 | -62.405 | 78.711 | 8.307  | 1.00       | 58.22 | N |
| ATOM | 1462 | CA  | THR | 190 | -61.415 | 78.411 | 9.306  | 1.00       | 58.22 | C |
| ATOM | 1463 | CB  | THR | 190 | -62.025 | 77.858 | 10.560 | 1.00       | 58.22 | C |
| ATOM | 1464 | OG1 | THR | 190 | -62.976 | 78.766 | 11.090 | 1.00       | 58.22 | O |
| ATOM | 1465 | CG2 | THR | 190 | -60.905 | 77.600 | 11.577 | 1.00       | 58.22 | C |
| ATOM | 1466 | C   | THR | 190 | -60.538 | 77.316 | 8.794  | 1.00       | 58.22 | C |
| ATOM | 1467 | O   | THR | 190 | -59.323 | 77.331 | 8.983  | 1.00       | 58.22 | O |
| ATOM | 1468 | N   | MET | 191 | -61.156 | 76.311 | 8.155  | 1.00127.84 |       | N |
| ATOM | 1469 | CA  | MET | 191 | -60.450 | 75.174 | 7.648  | 1.00127.84 |       | C |
| ATOM | 1470 | CB  | MET | 191 | -61.388 | 74.092 | 7.115  | 1.00127.84 |       | C |
| ATOM | 1471 | CG  | MET | 191 | -61.906 | 73.207 | 8.239  | 1.00127.84 |       | C |
| ATOM | 1472 | SD  | MET | 191 | -62.890 | 74.044 | 9.518  | 1.00127.84 |       | S |
| ATOM | 1473 | CE  | MET | 191 | -61.455 | 74.601 | 10.483 | 1.00127.84 |       | C |
| ATOM | 1474 | C   | MET | 191 | -59.518 | 75.561 | 6.552  | 1.00127.84 |       | C |
| ATOM | 1475 | O   | MET | 191 | -58.410 | 75.036 | 6.457  | 1.00127.84 |       | O |
| ATOM | 1476 | N   | MET | 192 | -59.933 | 76.495 | 5.684  | 1.00143.08 |       | N |
| ATOM | 1477 | CA  | MET | 192 | -59.087 | 76.848 | 4.583  | 1.00143.08 |       | C |
| ATOM | 1478 | CB  | MET | 192 | -59.737 | 77.871 | 3.627  | 1.00143.08 |       | C |
| ATOM | 1479 | CG  | MET | 192 | -59.878 | 79.293 | 4.177  | 1.00143.08 |       | C |
| ATOM | 1480 | SD  | MET | 192 | -58.355 | 80.289 | 4.161  | 1.00143.08 |       | S |
| ATOM | 1481 | CE  | MET | 192 | -59.085 | 81.710 | 5.024  | 1.00143.08 |       | C |
| ATOM | 1482 | C   | MET | 192 | -57.820 | 77.423 | 5.129  | 1.00143.08 |       | C |
| ATOM | 1483 | O   | MET | 192 | -56.736 | 77.160 | 4.610  | 1.00143.08 |       | O |
| ATOM | 1484 | N   | GLU | 193 | -57.924 | 78.216 | 6.211  | 1.00       | 33.42 | N |
| ATOM | 1485 | CA  | GLU | 193 | -56.766 | 78.849 | 6.770  | 1.00       | 33.42 | C |
| ATOM | 1486 | CB  | GLU | 193 | -57.091 | 79.686 | 8.020  | 1.00       | 33.42 | C |
| ATOM | 1487 | CG  | GLU | 193 | -57.977 | 80.903 | 7.755  | 1.00       | 33.42 | C |
| ATOM | 1488 | CD  | GLU | 193 | -58.236 | 81.575 | 9.096  | 1.00       | 33.42 | C |
| ATOM | 1489 | OE1 | GLU | 193 | -57.482 | 81.281 | 10.062 | 1.00       | 33.42 | O |
| ATOM | 1490 | OE2 | GLU | 193 | -59.193 | 82.390 | 9.174  | 1.00       | 33.42 | O |
| ATOM | 1491 | C   | GLU | 193 | -55.809 | 77.790 | 7.218  | 1.00       | 33.42 | C |
| ATOM | 1492 | O   | GLU | 193 | -54.610 | 77.883 | 6.960  | 1.00       | 33.42 | O |
| ATOM | 1493 | N   | THR | 194 | -56.318 | 76.747 | 7.898  | 1.00       | 99.93 | N |
| ATOM | 1494 | CA  | THR | 194 | -55.457 | 75.723 | 8.416  | 1.00       | 99.93 | C |
| ATOM | 1495 | CB  | THR | 194 | -56.150 | 74.754 | 9.334  | 1.00       | 99.93 | C |
| ATOM | 1496 | OG1 | THR | 194 | -55.189 | 73.978 | 10.034 | 1.00       | 99.93 | O |
| ATOM | 1497 | CG2 | THR | 194 | -57.064 | 73.831 | 8.515  | 1.00       | 99.93 | C |
| ATOM | 1498 | C   | THR | 194 | -54.831 | 74.961 | 7.286  | 1.00       | 99.93 | C |
| ATOM | 1499 | O   | THR | 194 | -53.660 | 74.597 | 7.356  | 1.00       | 99.93 | O |
| ATOM | 1500 | N   | MET | 195 | -55.598 | 74.693 | 6.212  | 1.00       | 91.09 | N |
| ATOM | 1501 | CA  | MET | 195 | -55.082 | 73.949 | 5.095  | 1.00       | 91.09 | C |
| ATOM | 1502 | CB  | MET | 195 | -56.142 | 73.653 | 4.015  | 1.00       | 91.09 | C |
| ATOM | 1503 | CG  | MET | 195 | -57.037 | 72.455 | 4.351  | 1.00       | 91.09 | C |
| ATOM | 1504 | SD  | MET | 195 | -56.347 | 70.836 | 3.880  | 1.00       | 91.09 | S |
| ATOM | 1505 | CE  | MET | 195 | -54.801 | 70.950 | 4.817  | 1.00       | 91.09 | C |
| ATOM | 1506 | C   | MET | 195 | -53.961 | 74.705 | 4.455  | 1.00       | 91.09 | C |
| ATOM | 1507 | O   | MET | 195 | -52.953 | 74.116 | 4.065  | 1.00       | 91.09 | O |
| ATOM | 1508 | N   | GLU | 196 | -54.105 | 76.035 | 4.328  | 1.00       | 32.12 | N |
| ATOM | 1509 | CA  | GLU | 196 | -53.094 | 76.835 | 3.699  | 1.00       | 32.12 | C |
| ATOM | 1510 | CB  | GLU | 196 | -53.504 | 78.314 | 3.603  | 1.00       | 32.12 | C |
| ATOM | 1511 | CG  | GLU | 196 | -54.699 | 78.549 | 2.679  | 1.00       | 32.12 | C |
| ATOM | 1512 | CD  | GLU | 196 | -55.104 | 80.011 | 2.801  | 1.00       | 32.12 | C |
| ATOM | 1513 | OE1 | GLU | 196 | -54.500 | 80.724 | 3.646  | 1.00       | 32.12 | O |
| ATOM | 1514 | OE2 | GLU | 196 | -56.026 | 80.432 | 2.053  | 1.00       | 32.12 | O |
| ATOM | 1515 | C   | GLU | 196 | -51.845 | 76.765 | 4.520  | 1.00       | 32.12 | C |
| ATOM | 1516 | O   | GLU | 196 | -50.743 | 76.665 | 3.984  | 1.00       | 32.12 | O |
| ATOM | 1517 | N   | ARG | 197 | -51.987 | 76.824 | 5.855  | 1.00129.65 |       | N |
| ATOM | 1518 | CA  | ARG | 197 | -50.849 | 76.796 | 6.729  | 1.00129.65 |       | C |
| ATOM | 1519 | CB  | ARG | 197 | -51.248 | 76.890 | 8.208  | 1.00129.65 |       | C |
| ATOM | 1520 | CG  | ARG | 197 | -51.902 | 78.213 | 8.601  | 1.00129.65 |       | C |
| ATOM | 1521 | CD  | ARG | 197 | -52.451 | 78.215 | 10.029 | 1.00129.65 |       | C |
| ATOM | 1522 | NE  | ARG | 197 | -51.379 | 77.700 | 10.927 | 1.00129.65 |       | N |

|      |      |     |     |     |         |        |        |            |   |
|------|------|-----|-----|-----|---------|--------|--------|------------|---|
| ATOM | 1523 | CZ  | ARG | 197 | -51.556 | 76.532 | 11.610 | 1.00129.65 | C |
| ATOM | 1524 | NH1 | ARG | 197 | -52.737 | 75.853 | 11.511 | 1.00129.65 | N |
| ATOM | 1525 | NH2 | ARG | 197 | -50.556 | 76.046 | 12.402 | 1.00129.65 | N |
| ATOM | 1526 | C   | ARG | 197 | -50.157 | 75.479 | 6.580  | 1.00129.65 | C |
| ATOM | 1527 | O   | ARG | 197 | -48.935 | 75.414 | 6.468  | 1.00129.65 | O |
| ATOM | 1528 | N   | LEU | 198 | -50.949 | 74.392 | 6.574  | 1.00 78.83 | N |
| ATOM | 1529 | CA  | LEU | 198 | -50.455 | 73.047 | 6.504  | 1.00 78.83 | C |
| ATOM | 1530 | CB  | LEU | 198 | -51.583 | 72.011 | 6.639  | 1.00 78.83 | C |
| ATOM | 1531 | CG  | LEU | 198 | -52.231 | 71.989 | 8.034  | 1.00 78.83 | C |
| ATOM | 1532 | CD1 | LEU | 198 | -53.352 | 70.946 | 8.111  | 1.00 78.83 | C |
| ATOM | 1533 | CD2 | LEU | 198 | -51.174 | 71.769 | 9.126  | 1.00 78.83 | C |
| ATOM | 1534 | C   | LEU | 198 | -49.786 | 72.793 | 5.188  | 1.00 78.83 | C |
| ATOM | 1535 | O   | LEU | 198 | -48.774 | 72.096 | 5.128  | 1.00 78.83 | O |
| ATOM | 1536 | N   | GLN | 199 | -50.348 | 73.335 | 4.092  | 1.00 87.05 | N |
| ATOM | 1537 | CA  | GLN | 199 | -49.809 | 73.094 | 2.785  | 1.00 87.05 | C |
| ATOM | 1538 | CB  | GLN | 199 | -50.652 | 73.704 | 1.644  | 1.00 87.05 | C |
| ATOM | 1539 | CG  | GLN | 199 | -50.702 | 75.233 | 1.646  | 1.00 87.05 | C |
| ATOM | 1540 | CD  | GLN | 199 | -51.558 | 75.695 | 0.475  | 1.00 87.05 | C |
| ATOM | 1541 | OE1 | GLN | 199 | -51.242 | 75.430 | -0.683 | 1.00 87.05 | O |
| ATOM | 1542 | NE2 | GLN | 199 | -52.673 | 76.411 | 0.783  | 1.00 87.05 | N |
| ATOM | 1543 | C   | GLN | 199 | -48.436 | 73.670 | 2.700  | 1.00 87.05 | C |
| ATOM | 1544 | O   | GLN | 199 | -47.544 | 73.076 | 2.096  | 1.00 87.05 | O |
| ATOM | 1545 | N   | ARG | 200 | -48.222 | 74.852 | 3.303  | 1.00 93.61 | N |
| ATOM | 1546 | CA  | ARG | 200 | -46.932 | 75.459 | 3.203  | 1.00 93.61 | C |
| ATOM | 1547 | CB  | ARG | 200 | -46.848 | 76.798 | 3.960  | 1.00 93.61 | C |
| ATOM | 1548 | CG  | ARG | 200 | -47.843 | 77.867 | 3.494  | 1.00 93.61 | C |
| ATOM | 1549 | CD  | ARG | 200 | -47.635 | 78.336 | 2.053  | 1.00 93.61 | C |
| ATOM | 1550 | NE  | ARG | 200 | -48.434 | 79.582 | 1.865  | 1.00 93.61 | N |
| ATOM | 1551 | CZ  | ARG | 200 | -49.755 | 79.520 | 1.524  | 1.00 93.61 | C |
| ATOM | 1552 | NH1 | ARG | 200 | -50.373 | 78.312 | 1.378  | 1.00 93.61 | N |
| ATOM | 1553 | NH2 | ARG | 200 | -50.460 | 80.673 | 1.332  | 1.00 93.61 | N |
| ATOM | 1554 | C   | ARG | 200 | -45.921 | 74.544 | 3.831  | 1.00 93.61 | C |
| ATOM | 1555 | O   | ARG | 200 | -44.890 | 74.246 | 3.228  | 1.00 93.61 | O |
| ATOM | 1556 | N   | ARG | 201 | -46.186 | 74.080 | 5.072  | 1.00206.63 | N |
| ATOM | 1557 | CA  | ARG | 201 | -45.228 | 73.267 | 5.774  | 1.00206.63 | C |
| ATOM | 1558 | CB  | ARG | 201 | -45.568 | 73.037 | 7.256  | 1.00206.63 | C |
| ATOM | 1559 | CG  | ARG | 201 | -45.389 | 74.264 | 8.145  | 1.00206.63 | C |
| ATOM | 1560 | CD  | ARG | 201 | -44.704 | 73.937 | 9.475  | 1.00206.63 | C |
| ATOM | 1561 | NE  | ARG | 201 | -45.552 | 72.964 | 10.223 | 1.00206.63 | N |
| ATOM | 1562 | CZ  | ARG | 201 | -44.977 | 71.878 | 10.819 | 1.00206.63 | C |
| ATOM | 1563 | NH1 | ARG | 201 | -43.643 | 71.634 | 10.654 | 1.00206.63 | N |
| ATOM | 1564 | NH2 | ARG | 201 | -45.732 | 71.033 | 11.579 | 1.00206.63 | N |
| ATOM | 1565 | C   | ARG | 201 | -45.059 | 71.884 | 5.207  | 1.00206.63 | C |
| ATOM | 1566 | O   | ARG | 201 | -43.942 | 71.416 | 4.988  | 1.00206.63 | O |
| ATOM | 1567 | N   | HIS | 202 | -46.181 | 71.162 | 5.046  | 1.00157.46 | N |
| ATOM | 1568 | CA  | HIS | 202 | -46.187 | 69.786 | 4.629  | 1.00157.46 | C |
| ATOM | 1569 | ND1 | HIS | 202 | -46.641 | 68.771 | 7.529  | 1.00157.46 | N |
| ATOM | 1570 | CG  | HIS | 202 | -47.570 | 69.204 | 6.611  | 1.00157.46 | C |
| ATOM | 1571 | CB  | HIS | 202 | -47.424 | 69.038 | 5.133  | 1.00157.46 | C |
| ATOM | 1572 | NE2 | HIS | 202 | -48.272 | 69.743 | 8.684  | 1.00157.46 | N |
| ATOM | 1573 | CD2 | HIS | 202 | -48.560 | 69.795 | 7.333  | 1.00157.46 | C |
| ATOM | 1574 | CE1 | HIS | 202 | -47.110 | 69.120 | 8.753  | 1.00157.46 | C |
| ATOM | 1575 | C   | HIS | 202 | -46.121 | 69.578 | 3.145  | 1.00157.46 | C |
| ATOM | 1576 | O   | HIS | 202 | -45.616 | 68.551 | 2.688  | 1.00157.46 | O |
| ATOM | 1577 | N   | GLY | 203 | -46.691 | 70.512 | 2.358  | 1.00 39.12 | N |
| ATOM | 1578 | CA  | GLY | 203 | -46.761 | 70.341 | 0.932  | 1.00 39.12 | C |
| ATOM | 1579 | C   | GLY | 203 | -48.032 | 69.600 | 0.627  | 1.00 39.12 | C |
| ATOM | 1580 | O   | GLY | 203 | -48.934 | 69.535 | 1.460  | 1.00 39.12 | O |
| ATOM | 1581 | N   | GLY | 204 | -48.145 | 69.043 | -0.600 | 1.00 26.60 | N |
| ATOM | 1582 | CA  | GLY | 204 | -49.301 | 68.267 | -0.964 | 1.00 26.60 | C |
| ATOM | 1583 | C   | GLY | 204 | -50.378 | 69.161 | -1.500 | 1.00 26.60 | C |
| ATOM | 1584 | O   | GLY | 204 | -50.188 | 70.367 | -1.654 | 1.00 26.60 | O |
| ATOM | 1585 | N   | GLY | 205 | -51.556 | 68.562 | -1.796 | 1.00 34.04 | N |
| ATOM | 1586 | CA  | GLY | 205 | -52.665 | 69.292 | -2.345 | 1.00 34.04 | C |
| ATOM | 1587 | C   | GLY | 205 | -53.935 | 68.597 | -1.957 | 1.00 34.04 | C |
| ATOM | 1588 | O   | GLY | 205 | -53.932 | 67.458 | -1.491 | 1.00 34.04 | O |



|      |      |     |     |     |         |        |        |      |        |   |
|------|------|-----|-----|-----|---------|--------|--------|------|--------|---|
| ATOM | 1589 | N   | LEU | 206 | -55.072 | 69.285 | -2.168 | 1.00 | 94.90  | N |
| ATOM | 1590 | CA  | LEU | 206 | -56.356 | 68.781 | -1.773 | 1.00 | 94.90  | C |
| ATOM | 1591 | CB  | LEU | 206 | -57.204 | 69.935 | -1.205 | 1.00 | 94.90  | C |
| ATOM | 1592 | CG  | LEU | 206 | -58.416 | 69.539 | -0.351 | 1.00 | 94.90  | C |
| ATOM | 1593 | CD1 | LEU | 206 | -57.964 | 68.740 | 0.885  | 1.00 | 94.90  | C |
| ATOM | 1594 | CD2 | LEU | 206 | -59.230 | 70.784 | 0.041  | 1.00 | 94.90  | C |
| ATOM | 1595 | C   | LEU | 206 | -56.985 | 68.209 | -3.014 | 1.00 | 94.90  | C |
| ATOM | 1596 | O   | LEU | 206 | -57.043 | 68.872 | -4.049 | 1.00 | 94.90  | O |
| ATOM | 1597 | N   | VAL | 207 | -57.468 | 66.946 | -2.949 | 1.00 | 116.82 | N |
| ATOM | 1598 | CA  | VAL | 207 | -57.962 | 66.329 | -4.151 | 1.00 | 116.82 | C |
| ATOM | 1599 | CB  | VAL | 207 | -57.073 | 65.198 | -4.594 | 1.00 | 116.82 | C |
| ATOM | 1600 | CG1 | VAL | 207 | -57.640 | 63.855 | -4.100 | 1.00 | 116.82 | C |
| ATOM | 1601 | CG2 | VAL | 207 | -56.808 | 65.325 | -6.096 | 1.00 | 116.82 | C |
| ATOM | 1602 | C   | VAL | 207 | -59.327 | 65.765 | -3.881 | 1.00 | 116.82 | C |
| ATOM | 1603 | O   | VAL | 207 | -59.607 | 65.280 | -2.785 | 1.00 | 116.82 | O |
| ATOM | 1604 | N   | ARG | 208 | -60.232 | 65.822 | -4.884 | 1.00 | 106.49 | N |
| ATOM | 1605 | CA  | ARG | 208 | -61.541 | 65.260 | -4.689 | 1.00 | 106.49 | C |
| ATOM | 1606 | CB  | ARG | 208 | -62.699 | 66.145 | -5.181 | 1.00 | 106.49 | C |
| ATOM | 1607 | CG  | ARG | 208 | -64.058 | 65.507 | -4.894 | 1.00 | 106.49 | C |
| ATOM | 1608 | CD  | ARG | 208 | -64.312 | 65.341 | -3.396 | 1.00 | 106.49 | C |
| ATOM | 1609 | NE  | ARG | 208 | -65.503 | 64.466 | -3.215 | 1.00 | 106.49 | N |
| ATOM | 1610 | CZ  | ARG | 208 | -66.745 | 65.014 | -3.097 | 1.00 | 106.49 | C |
| ATOM | 1611 | NH1 | ARG | 208 | -66.904 | 66.364 | -3.194 | 1.00 | 106.49 | N |
| ATOM | 1612 | NH2 | ARG | 208 | -67.826 | 64.212 | -2.872 | 1.00 | 106.49 | N |
| ATOM | 1613 | C   | ARG | 208 | -61.607 | 63.978 | -5.457 | 1.00 | 106.49 | C |
| ATOM | 1614 | O   | ARG | 208 | -61.290 | 63.934 | -6.644 | 1.00 | 106.49 | O |
| ATOM | 1615 | N   | VAL | 209 | -62.030 | 62.889 | -4.785 | 1.00 | 111.79 | N |
| ATOM | 1616 | CA  | VAL | 209 | -62.085 | 61.607 | -5.431 | 1.00 | 111.79 | C |
| ATOM | 1617 | CB  | VAL | 209 | -61.853 | 60.457 | -4.494 | 1.00 | 111.79 | C |
| ATOM | 1618 | CG1 | VAL | 209 | -60.428 | 60.572 | -3.925 | 1.00 | 111.79 | C |
| ATOM | 1619 | CG2 | VAL | 209 | -62.956 | 60.464 | -3.423 | 1.00 | 111.79 | C |
| ATOM | 1620 | C   | VAL | 209 | -63.434 | 61.416 | -6.054 | 1.00 | 111.79 | C |
| ATOM | 1621 | O   | VAL | 209 | -64.471 | 61.699 | -5.455 | 1.00 | 111.79 | O |
| ATOM | 1622 | N   | PRO | 210 | -63.410 | 60.946 | -7.276 | 1.00 | 99.79  | N |
| ATOM | 1623 | CA  | PRO | 210 | -64.594 | 60.668 | -8.050 | 1.00 | 99.79  | C |
| ATOM | 1624 | CD  | PRO | 210 | -62.216 | 60.330 | -7.845 | 1.00 | 99.79  | C |
| ATOM | 1625 | CB  | PRO | 210 | -64.070 | 60.163 | -9.395 | 1.00 | 99.79  | C |
| ATOM | 1626 | CG  | PRO | 210 | -62.726 | 59.497 | -9.033 | 1.00 | 99.79  | C |
| ATOM | 1627 | C   | PRO | 210 | -65.413 | 59.601 | -7.381 | 1.00 | 99.79  | C |
| ATOM | 1628 | O   | PRO | 210 | -66.612 | 59.509 | -7.640 | 1.00 | 99.79  | O |
| ATOM | 1629 | N   | LEU | 211 | -64.766 | 58.745 | -6.572 | 1.00 | 122.77 | N |
| ATOM | 1630 | CA  | LEU | 211 | -65.404 | 57.650 | -5.894 | 1.00 | 122.77 | C |
| ATOM | 1631 | CB  | LEU | 211 | -64.418 | 56.653 | -5.259 | 1.00 | 122.77 | C |
| ATOM | 1632 | CG  | LEU | 211 | -63.642 | 55.812 | -6.291 | 1.00 | 122.77 | C |
| ATOM | 1633 | CD1 | LEU | 211 | -62.699 | 56.676 | -7.139 | 1.00 | 122.77 | C |
| ATOM | 1634 | CD2 | LEU | 211 | -62.928 | 54.632 | -5.623 | 1.00 | 122.77 | C |
| ATOM | 1635 | C   | LEU | 211 | -66.308 | 58.142 | -4.812 | 1.00 | 122.77 | C |
| ATOM | 1636 | O   | LEU | 211 | -67.248 | 57.448 | -4.429 | 1.00 | 122.77 | O |
| ATOM | 1637 | N   | CYS | 212 | -66.003 | 59.321 | -4.243 | 1.00 | 94.04  | N |
| ATOM | 1638 | CA  | CYS | 212 | -66.762 | 59.874 | -3.156 | 1.00 | 94.04  | C |
| ATOM | 1639 | CB  | CYS | 212 | -66.122 | 61.146 | -2.578 | 1.00 | 94.04  | C |
| ATOM | 1640 | SG  | CYS | 212 | -67.078 | 61.844 | -1.205 | 1.00 | 94.04  | S |
| ATOM | 1641 | C   | CYS | 212 | -68.146 | 60.224 | -3.609 | 1.00 | 94.04  | C |
| ATOM | 1642 | O   | CYS | 212 | -68.356 | 60.696 | -4.726 | 1.00 | 94.04  | O |
| ATOM | 1643 | N   | ARG | 213 | -69.135 | 59.996 | -2.722 | 1.00 | 226.71 | N |
| ATOM | 1644 | CA  | ARG | 213 | -70.513 | 60.269 | -3.023 | 1.00 | 226.71 | C |
| ATOM | 1645 | CB  | ARG | 213 | -71.489 | 59.467 | -2.143 | 1.00 | 226.71 | C |
| ATOM | 1646 | CG  | ARG | 213 | -71.432 | 57.963 | -2.426 | 1.00 | 226.71 | C |
| ATOM | 1647 | CD  | ARG | 213 | -72.684 | 57.422 | -3.111 | 1.00 | 226.71 | C |
| ATOM | 1648 | NE  | ARG | 213 | -72.397 | 56.037 | -3.581 | 1.00 | 226.71 | N |
| ATOM | 1649 | CZ  | ARG | 213 | -72.454 | 54.977 | -2.723 | 1.00 | 226.71 | C |
| ATOM | 1650 | NH1 | ARG | 213 | -72.600 | 55.183 | -1.382 | 1.00 | 226.71 | N |
| ATOM | 1651 | NH2 | ARG | 213 | -72.361 | 53.706 | -3.212 | 1.00 | 226.71 | N |
| ATOM | 1652 | C   | ARG | 213 | -70.776 | 61.738 | -2.838 | 1.00 | 226.71 | C |
| ATOM | 1653 | O   | ARG | 213 | -70.053 | 62.441 | -2.137 | 1.00 | 226.71 | O |
| ATOM | 1654 | N   | ASN | 214 | -71.847 | 62.225 | -3.491 | 1.00 | 106.84 | N |

|      |      |     |     |     |         |        |        |            |   |
|------|------|-----|-----|-----|---------|--------|--------|------------|---|
| ATOM | 1655 | CA  | ASN | 214 | -72.270 | 63.598 | -3.552 | 1.00106.84 | C |
| ATOM | 1656 | CB  | ASN | 214 | -73.432 | 63.814 | -4.529 | 1.00106.84 | C |
| ATOM | 1657 | CG  | ASN | 214 | -72.900 | 63.501 | -5.914 | 1.00106.84 | C |
| ATOM | 1658 | OD1 | ASN | 214 | -71.689 | 63.469 | -6.132 | 1.00106.84 | O |
| ATOM | 1659 | ND2 | ASN | 214 | -73.830 | 63.268 | -6.876 | 1.00106.84 | N |
| ATOM | 1660 | C   | ASN | 214 | -72.739 | 64.085 | -2.216 | 1.00106.84 | C |
| ATOM | 1661 | O   | ASN | 214 | -72.827 | 65.289 | -1.986 | 1.00106.84 | O |
| ATOM | 1662 | N   | SER | 215 | -73.126 | 63.155 | -1.330 | 1.00 81.07 | N |
| ATOM | 1663 | CA  | SER | 215 | -73.655 | 63.483 | -0.038 | 1.00 81.07 | C |
| ATOM | 1664 | CB  | SER | 215 | -74.168 | 62.234 | 0.707  | 1.00 81.07 | C |
| ATOM | 1665 | OG  | SER | 215 | -73.137 | 61.263 | 0.821  | 1.00 81.07 | O |
| ATOM | 1666 | C   | SER | 215 | -72.619 | 64.168 | 0.804  | 1.00 81.07 | C |
| ATOM | 1667 | O   | SER | 215 | -72.955 | 64.794 | 1.809  | 1.00 81.07 | O |
| ATOM | 1668 | N   | THR | 216 | -71.326 | 64.059 | 0.448  | 1.00137.99 | N |
| ATOM | 1669 | CA  | THR | 216 | -70.326 | 64.716 | 1.240  | 1.00137.99 | C |
| ATOM | 1670 | CB  | THR | 216 | -69.511 | 63.765 | 2.067  | 1.00137.99 | C |
| ATOM | 1671 | OG1 | THR | 216 | -68.545 | 64.471 | 2.832  | 1.00137.99 | O |
| ATOM | 1672 | CG2 | THR | 216 | -68.840 | 62.747 | 1.138  | 1.00137.99 | C |
| ATOM | 1673 | C   | THR | 216 | -69.391 | 65.504 | 0.362  | 1.00137.99 | C |
| ATOM | 1674 | O   | THR | 216 | -69.192 | 65.193 | -0.809 | 1.00137.99 | O |
| ATOM | 1675 | N   | HIS | 217 | -68.871 | 66.614 | 0.920  | 1.00141.89 | N |
| ATOM | 1676 | CA  | HIS | 217 | -67.937 | 67.550 | 0.346  | 1.00141.89 | C |
| ATOM | 1677 | ND1 | HIS | 217 | -66.193 | 70.423 | -0.095 | 1.00141.89 | N |
| ATOM | 1678 | CG  | HIS | 217 | -67.514 | 70.029 | -0.061 | 1.00141.89 | C |
| ATOM | 1679 | CB  | HIS | 217 | -68.092 | 68.992 | 0.870  | 1.00141.89 | C |
| ATOM | 1680 | NE2 | HIS | 217 | -67.241 | 71.596 | -1.665 | 1.00141.89 | N |
| ATOM | 1681 | CD2 | HIS | 217 | -68.139 | 70.758 | -1.027 | 1.00141.89 | C |
| ATOM | 1682 | CE1 | HIS | 217 | -66.087 | 71.359 | -1.071 | 1.00141.89 | C |
| ATOM | 1683 | C   | HIS | 217 | -66.512 | 67.112 | 0.576  | 1.00141.89 | C |
| ATOM | 1684 | O   | HIS | 217 | -65.581 | 67.877 | 0.334  | 1.00141.89 | O |
| ATOM | 1685 | N   | GLU | 218 | -66.300 | 65.934 | 1.186  | 1.00 91.71 | N |
| ATOM | 1686 | CA  | GLU | 218 | -64.990 | 65.499 | 1.602  | 1.00 91.71 | C |
| ATOM | 1687 | CB  | GLU | 218 | -64.989 | 64.069 | 2.161  | 1.00 91.71 | C |
| ATOM | 1688 | CG  | GLU | 218 | -65.357 | 63.021 | 1.111  | 1.00 91.71 | C |
| ATOM | 1689 | CD  | GLU | 218 | -65.623 | 61.712 | 1.834  | 1.00 91.71 | C |
| ATOM | 1690 | OE1 | GLU | 218 | -65.594 | 61.715 | 3.092  | 1.00 91.71 | O |
| ATOM | 1691 | OE2 | GLU | 218 | -65.870 | 60.692 | 1.138  | 1.00 91.71 | O |
| ATOM | 1692 | C   | GLU | 218 | -63.968 | 65.553 | 0.501  | 1.00 91.71 | C |
| ATOM | 1693 | O   | GLU | 218 | -64.236 | 65.227 | -0.655 | 1.00 91.71 | O |
| ATOM | 1694 | N   | MET | 219 | -62.741 | 65.991 | 0.869  | 1.00144.92 | N |
| ATOM | 1695 | CA  | MET | 219 | -61.611 | 66.093 | -0.016 | 1.00144.92 | C |
| ATOM | 1696 | CB  | MET | 219 | -61.187 | 67.552 | -0.255 | 1.00144.92 | C |
| ATOM | 1697 | CG  | MET | 219 | -62.252 | 68.437 | -0.912 | 1.00144.92 | C |
| ATOM | 1698 | SD  | MET | 219 | -62.308 | 68.391 | -2.726 | 1.00144.92 | S |
| ATOM | 1699 | CE  | MET | 219 | -61.002 | 69.627 | -2.976 | 1.00144.92 | C |
| ATOM | 1700 | C   | MET | 219 | -60.457 | 65.452 | 0.701  | 1.00144.92 | C |
| ATOM | 1701 | O   | MET | 219 | -60.446 | 65.401 | 1.930  | 1.00144.92 | O |
| ATOM | 1702 | N   | TYR | 220 | -59.444 | 64.952 | -0.044 | 1.00 74.37 | N |
| ATOM | 1703 | CA  | TYR | 220 | -58.338 | 64.310 | 0.611  | 1.00 74.37 | C |
| ATOM | 1704 | CB  | TYR | 220 | -58.108 | 62.850 | 0.171  | 1.00 74.37 | C |
| ATOM | 1705 | CG  | TYR | 220 | -59.206 | 62.024 | 0.755  | 1.00 74.37 | C |
| ATOM | 1706 | CD1 | TYR | 220 | -60.423 | 61.899 | 0.122  | 1.00 74.37 | C |
| ATOM | 1707 | CD2 | TYR | 220 | -59.013 | 61.373 | 1.952  | 1.00 74.37 | C |
| ATOM | 1708 | CE1 | TYR | 220 | -61.424 | 61.137 | 0.679  | 1.00 74.37 | C |
| ATOM | 1709 | CE2 | TYR | 220 | -60.008 | 60.609 | 2.513  | 1.00 74.37 | C |
| ATOM | 1710 | CZ  | TYR | 220 | -61.218 | 60.489 | 1.875  | 1.00 74.37 | C |
| ATOM | 1711 | OH  | TYR | 220 | -62.244 | 59.706 | 2.447  | 1.00 74.37 | O |
| ATOM | 1712 | C   | TYR | 220 | -57.076 | 65.072 | 0.362  | 1.00 74.37 | C |
| ATOM | 1713 | O   | TYR | 220 | -56.705 | 65.378 | -0.770 | 1.00 74.37 | O |
| ATOM | 1714 | N   | TRP | 221 | -56.373 | 65.388 | 1.464  | 1.00102.78 | N |
| ATOM | 1715 | CA  | TRP | 221 | -55.134 | 66.098 | 1.414  | 1.00102.78 | C |
| ATOM | 1716 | CB  | TRP | 221 | -54.856 | 66.793 | 2.752  | 1.00102.78 | C |
| ATOM | 1717 | CG  | TRP | 221 | -53.539 | 67.505 | 2.834  | 1.00102.78 | C |
| ATOM | 1718 | CD2 | TRP | 221 | -52.899 | 67.821 | 4.077  | 1.00102.78 | C |
| ATOM | 1719 | CD1 | TRP | 221 | -52.710 | 67.942 | 1.844  | 1.00102.78 | C |
| ATOM | 1720 | NE1 | TRP | 221 | -51.588 | 68.514 | 2.393  | 1.00102.78 | N |

|      |      |     |     |     |         |        |        |            |   |
|------|------|-----|-----|-----|---------|--------|--------|------------|---|
| ATOM | 1721 | CE2 | TRP | 221 | -51.693 | 68.445 | 3.767  | 1.00102.78 | C |
| ATOM | 1722 | CE3 | TRP | 221 | -53.289 | 67.605 | 5.367  | 1.00102.78 | C |
| ATOM | 1723 | CZ2 | TRP | 221 | -50.848 | 68.863 | 4.754  | 1.00102.78 | C |
| ATOM | 1724 | CZ3 | TRP | 221 | -52.437 | 68.032 | 6.360  | 1.00102.78 | C |
| ATOM | 1725 | CH2 | TRP | 221 | -51.241 | 68.648 | 6.057  | 1.00102.78 | C |
| ATOM | 1726 | C   | TRP | 221 | -54.071 | 65.064 | 1.196  | 1.00102.78 | C |
| ATOM | 1727 | O   | TRP | 221 | -53.716 | 64.328 | 2.115  | 1.00102.78 | O |
| ATOM | 1728 | N   | VAL | 222 | -53.515 | 65.006 | -0.033 | 1.00 69.38 | N |
| ATOM | 1729 | CA  | VAL | 222 | -52.572 | 63.980 | -0.380 | 1.00 69.38 | C |
| ATOM | 1730 | CB  | VAL | 222 | -52.975 | 63.256 | -1.632 | 1.00 69.38 | C |
| ATOM | 1731 | CG1 | VAL | 222 | -54.345 | 62.600 | -1.379 | 1.00 69.38 | C |
| ATOM | 1732 | CG2 | VAL | 222 | -52.982 | 64.253 | -2.804 | 1.00 69.38 | C |
| ATOM | 1733 | C   | VAL | 222 | -51.218 | 64.590 | -0.602 | 1.00 69.38 | C |
| ATOM | 1734 | O   | VAL | 222 | -51.090 | 65.732 | -1.035 | 1.00 69.38 | O |
| ATOM | 1735 | N   | SER | 223 | -50.159 | 63.814 | -0.298 | 1.00123.81 | N |
| ATOM | 1736 | CA  | SER | 223 | -48.793 | 64.271 | -0.346 | 1.00123.81 | C |
| ATOM | 1737 | CB  | SER | 223 | -47.785 | 63.250 | 0.188  | 1.00123.81 | C |
| ATOM | 1738 | OG  | SER | 223 | -47.911 | 63.130 | 1.590  | 1.00123.81 | O |
| ATOM | 1739 | C   | SER | 223 | -48.336 | 64.543 | -1.741 | 1.00123.81 | C |
| ATOM | 1740 | O   | SER | 223 | -47.546 | 65.463 | -1.951 | 1.00123.81 | O |
| ATOM | 1741 | N   | GLY | 224 | -48.798 | 63.754 | -2.732 | 1.00117.00 | N |
| ATOM | 1742 | CA  | GLY | 224 | -48.243 | 63.928 | -4.041 | 1.00117.00 | C |
| ATOM | 1743 | C   | GLY | 224 | -49.209 | 64.668 | -4.905 | 1.00117.00 | C |
| ATOM | 1744 | O   | GLY | 224 | -49.346 | 64.377 | -6.091 | 1.00117.00 | O |
| ATOM | 1745 | N   | ALA | 225 | -49.887 | 65.676 | -4.335 | 1.00 87.13 | N |
| ATOM | 1746 | CA  | ALA | 225 | -50.762 | 66.496 | -5.117 | 1.00 87.13 | C |
| ATOM | 1747 | CB  | ALA | 225 | -52.241 | 66.414 | -4.701 | 1.00 87.13 | C |
| ATOM | 1748 | C   | ALA | 225 | -50.298 | 67.896 | -4.870 | 1.00 87.13 | C |
| ATOM | 1749 | O   | ALA | 225 | -49.518 | 68.134 | -3.949 | 1.00 87.13 | O |
| ATOM | 1750 | N   | LYS | 226 | -50.697 | 68.845 | -5.741 | 1.00132.96 | N |
| ATOM | 1751 | CA  | LYS | 226 | -50.339 | 70.223 | -5.545 | 1.00132.96 | C |
| ATOM | 1752 | CB  | LYS | 226 | -48.941 | 70.583 | -6.073 | 1.00132.96 | C |
| ATOM | 1753 | CG  | LYS | 226 | -48.591 | 72.059 | -5.875 | 1.00132.96 | C |
| ATOM | 1754 | CD  | LYS | 226 | -48.491 | 72.478 | -4.409 | 1.00132.96 | C |
| ATOM | 1755 | CE  | LYS | 226 | -48.295 | 73.984 | -4.220 | 1.00132.96 | C |
| ATOM | 1756 | NZ  | LYS | 226 | -48.286 | 74.317 | -2.779 | 1.00132.96 | N |
| ATOM | 1757 | C   | LYS | 226 | -51.318 | 71.058 | -6.306 | 1.00132.96 | C |
| ATOM | 1758 | O   | LYS | 226 | -51.865 | 70.601 | -7.308 | 1.00132.96 | O |
| ATOM | 1759 | N   | SER | 227 | -51.589 | 72.291 | -5.817 | 1.00 87.68 | N |
| ATOM | 1760 | CA  | SER | 227 | -52.466 | 73.210 | -6.495 | 1.00 87.68 | C |
| ATOM | 1761 | CB  | SER | 227 | -53.744 | 72.563 | -7.073 | 1.00 87.68 | C |
| ATOM | 1762 | OG  | SER | 227 | -54.486 | 73.501 | -7.840 | 1.00 87.68 | O |
| ATOM | 1763 | C   | SER | 227 | -52.921 | 74.222 | -5.488 | 1.00 87.68 | C |
| ATOM | 1764 | O   | SER | 227 | -52.547 | 74.167 | -4.318 | 1.00 87.68 | O |
| ATOM | 1765 | N   | ASN | 228 | -53.737 | 75.197 | -5.937 | 1.00 42.83 | N |
| ATOM | 1766 | CA  | ASN | 228 | -54.278 | 76.179 | -5.045 | 1.00 42.83 | C |
| ATOM | 1767 | CB  | ASN | 228 | -54.767 | 77.444 | -5.770 | 1.00 42.83 | C |
| ATOM | 1768 | CG  | ASN | 228 | -55.146 | 78.470 | -4.716 | 1.00 42.83 | C |
| ATOM | 1769 | OD1 | ASN | 228 | -56.023 | 78.231 | -3.888 | 1.00 42.83 | O |
| ATOM | 1770 | ND2 | ASN | 228 | -54.462 | 79.645 | -4.738 | 1.00 42.83 | N |
| ATOM | 1771 | C   | ASN | 228 | -55.450 | 75.547 | -4.359 | 1.00 42.83 | C |
| ATOM | 1772 | O   | ASN | 228 | -56.327 | 74.975 | -5.006 | 1.00 42.83 | O |
| ATOM | 1773 | N   | ILE | 229 | -55.485 | 75.630 | -3.014 | 1.00 94.06 | N |
| ATOM | 1774 | CA  | ILE | 229 | -56.532 | 75.014 | -2.249 | 1.00 94.06 | C |
| ATOM | 1775 | CB  | ILE | 229 | -56.282 | 75.037 | -0.769 | 1.00 94.06 | C |
| ATOM | 1776 | CG1 | ILE | 229 | -55.127 | 74.086 | -0.416 | 1.00 94.06 | C |
| ATOM | 1777 | CG2 | ILE | 229 | -57.602 | 74.684 | -0.063 | 1.00 94.06 | C |
| ATOM | 1778 | CD1 | ILE | 229 | -53.791 | 74.483 | -1.034 | 1.00 94.06 | C |
| ATOM | 1779 | C   | ILE | 229 | -57.861 | 75.655 | -2.498 | 1.00 94.06 | C |
| ATOM | 1780 | O   | ILE | 229 | -58.851 | 74.957 | -2.717 | 1.00 94.06 | O |
| ATOM | 1781 | N   | ILE | 230 | -57.923 | 77.000 | -2.499 | 1.00 87.30 | N |
| ATOM | 1782 | CA  | ILE | 230 | -59.196 | 77.656 | -2.613 | 1.00 87.30 | C |
| ATOM | 1783 | CB  | ILE | 230 | -59.114 | 79.156 | -2.540 | 1.00 87.30 | C |
| ATOM | 1784 | CG1 | ILE | 230 | -58.316 | 79.725 | -3.723 | 1.00 87.30 | C |
| ATOM | 1785 | CG2 | ILE | 230 | -58.548 | 79.533 | -1.161 | 1.00 87.30 | C |
| ATOM | 1786 | CD1 | ILE | 230 | -58.453 | 81.239 | -3.876 | 1.00 87.30 | C |

|      |      |     |     |     |         |        |         |      |        |   |
|------|------|-----|-----|-----|---------|--------|---------|------|--------|---|
| ATOM | 1787 | C   | ILE | 230 | -59.823 | 77.303 | -3.921  | 1.00 | 87.30  | C |
| ATOM | 1788 | O   | ILE | 230 | -61.017 | 77.012 | -3.980  | 1.00 | 87.30  | O |
| ATOM | 1789 | N   | LYS | 231 | -59.036 | 77.314 | -5.011  | 1.00 | 68.84  | N |
| ATOM | 1790 | CA  | LYS | 231 | -59.601 | 77.036 | -6.299  | 1.00 | 68.84  | C |
| ATOM | 1791 | CB  | LYS | 231 | -58.588 | 77.160 | -7.451  | 1.00 | 68.84  | C |
| ATOM | 1792 | CG  | LYS | 231 | -58.252 | 78.600 | -7.847  | 1.00 | 68.84  | C |
| ATOM | 1793 | CD  | LYS | 231 | -57.442 | 79.376 | -6.807  | 1.00 | 68.84  | C |
| ATOM | 1794 | CE  | LYS | 231 | -57.033 | 80.771 | -7.285  | 1.00 | 68.84  | C |
| ATOM | 1795 | NZ  | LYS | 231 | -56.256 | 81.465 | -6.234  | 1.00 | 68.84  | N |
| ATOM | 1796 | C   | LYS | 231 | -60.135 | 75.639 | -6.326  | 1.00 | 68.84  | C |
| ATOM | 1797 | O   | LYS | 231 | -61.238 | 75.400 | -6.818  | 1.00 | 68.84  | O |
| ATOM | 1798 | N   | SER | 232 | -59.372 | 74.681 | -5.771  | 1.00 | 33.54  | N |
| ATOM | 1799 | CA  | SER | 232 | -59.747 | 73.297 | -5.841  | 1.00 | 33.54  | C |
| ATOM | 1800 | CB  | SER | 232 | -58.717 | 72.372 | -5.169  | 1.00 | 33.54  | C |
| ATOM | 1801 | OG  | SER | 232 | -59.141 | 71.020 | -5.264  | 1.00 | 33.54  | O |
| ATOM | 1802 | C   | SER | 232 | -61.058 | 73.077 | -5.153  | 1.00 | 33.54  | C |
| ATOM | 1803 | O   | SER | 232 | -61.932 | 72.387 | -5.675  | 1.00 | 33.54  | O |
| ATOM | 1804 | N   | VAL | 233 | -61.244 | 73.652 | -3.951  | 1.00 | 121.04 | N |
| ATOM | 1805 | CA  | VAL | 233 | -62.475 | 73.404 | -3.251  | 1.00 | 121.04 | C |
| ATOM | 1806 | CB  | VAL | 233 | -62.501 | 73.894 | -1.833  | 1.00 | 121.04 | C |
| ATOM | 1807 | CG1 | VAL | 233 | -61.570 | 73.006 | -1.003  | 1.00 | 121.04 | C |
| ATOM | 1808 | CG2 | VAL | 233 | -62.097 | 75.369 | -1.800  | 1.00 | 121.04 | C |
| ATOM | 1809 | C   | VAL | 233 | -63.653 | 73.968 | -3.981  | 1.00 | 121.04 | C |
| ATOM | 1810 | O   | VAL | 233 | -64.690 | 73.315 | -4.072  | 1.00 | 121.04 | O |
| ATOM | 1811 | N   | SER | 234 | -63.530 | 75.187 | -4.537  | 1.00 | 31.94  | N |
| ATOM | 1812 | CA  | SER | 234 | -64.651 | 75.810 | -5.182  | 1.00 | 31.94  | C |
| ATOM | 1813 | CB  | SER | 234 | -64.330 | 77.225 | -5.691  | 1.00 | 31.94  | C |
| ATOM | 1814 | OG  | SER | 234 | -64.004 | 78.073 | -4.600  | 1.00 | 31.94  | O |
| ATOM | 1815 | C   | SER | 234 | -65.070 | 74.992 | -6.361  | 1.00 | 31.94  | C |
| ATOM | 1816 | O   | SER | 234 | -66.260 | 74.898 | -6.662  | 1.00 | 31.94  | O |
| ATOM | 1817 | N   | THR | 235 | -64.110 | 74.366 | -7.064  | 1.00 | 92.48  | N |
| ATOM | 1818 | CA  | THR | 235 | -64.475 | 73.612 | -8.228  | 1.00 | 92.48  | C |
| ATOM | 1819 | CB  | THR | 235 | -63.307 | 73.066 | -9.002  | 1.00 | 92.48  | C |
| ATOM | 1820 | OG1 | THR | 235 | -63.737 | 72.648 | -10.289 | 1.00 | 92.48  | O |
| ATOM | 1821 | CG2 | THR | 235 | -62.707 | 71.868 | -8.250  | 1.00 | 92.48  | C |
| ATOM | 1822 | C   | THR | 235 | -65.337 | 72.466 | -7.801  | 1.00 | 92.48  | C |
| ATOM | 1823 | O   | THR | 235 | -66.273 | 72.095 | -8.505  | 1.00 | 92.48  | O |
| ATOM | 1824 | N   | THR | 236 | -65.028 | 71.856 | -6.639  | 1.00 | 41.30  | N |
| ATOM | 1825 | CA  | THR | 236 | -65.792 | 70.736 | -6.163  | 1.00 | 41.30  | C |
| ATOM | 1826 | CB  | THR | 236 | -65.216 | 70.122 | -4.918  | 1.00 | 41.30  | C |
| ATOM | 1827 | OG1 | THR | 236 | -63.887 | 69.684 | -5.157  | 1.00 | 41.30  | O |
| ATOM | 1828 | CG2 | THR | 236 | -66.093 | 68.930 | -4.498  | 1.00 | 41.30  | C |
| ATOM | 1829 | C   | THR | 236 | -67.190 | 71.171 | -5.847  | 1.00 | 41.30  | C |
| ATOM | 1830 | O   | THR | 236 | -68.157 | 70.513 | -6.228  | 1.00 | 41.30  | O |
| ATOM | 1831 | N   | SER | 237 | -67.336 | 72.312 | -5.150  | 1.00 | 90.71  | N |
| ATOM | 1832 | CA  | SER | 237 | -68.637 | 72.768 | -4.764  | 1.00 | 90.71  | C |
| ATOM | 1833 | CB  | SER | 237 | -68.567 | 73.967 | -3.800  | 1.00 | 90.71  | C |
| ATOM | 1834 | OG  | SER | 237 | -67.545 | 74.868 | -4.198  | 1.00 | 90.71  | O |
| ATOM | 1835 | C   | SER | 237 | -69.462 | 73.068 | -5.980  | 1.00 | 90.71  | C |
| ATOM | 1836 | O   | SER | 237 | -70.664 | 72.810 | -5.995  | 1.00 | 90.71  | O |
| ATOM | 1837 | N   | GLN | 238 | -68.847 | 73.592 | -7.052  | 1.00 | 80.89  | N |
| ATOM | 1838 | CA  | GLN | 238 | -69.622 | 73.887 | -8.221  | 1.00 | 80.89  | C |
| ATOM | 1839 | CB  | GLN | 238 | -68.821 | 74.601 | -9.320  | 1.00 | 80.89  | C |
| ATOM | 1840 | CG  | GLN | 238 | -69.676 | 74.904 | -10.549 | 1.00 | 80.89  | C |
| ATOM | 1841 | CD  | GLN | 238 | -70.932 | 75.605 | -10.054 | 1.00 | 80.89  | C |
| ATOM | 1842 | OE1 | GLN | 238 | -70.907 | 76.319 | -9.052  | 1.00 | 80.89  | O |
| ATOM | 1843 | NE2 | GLN | 238 | -72.069 | 75.385 | -10.766 | 1.00 | 80.89  | N |
| ATOM | 1844 | C   | GLN | 238 | -70.161 | 72.615 | -8.794  | 1.00 | 80.89  | C |
| ATOM | 1845 | O   | GLN | 238 | -71.309 | 72.561 | -9.231  | 1.00 | 80.89  | O |
| ATOM | 1846 | N   | LEU | 239 | -69.340 | 71.550 | -8.809  | 1.00 | 114.96 | N |
| ATOM | 1847 | CA  | LEU | 239 | -69.771 | 70.309 | -9.386  | 1.00 | 114.96 | C |
| ATOM | 1848 | CB  | LEU | 239 | -68.658 | 69.241 | -9.396  | 1.00 | 114.96 | C |
| ATOM | 1849 | CG  | LEU | 239 | -69.046 | 67.878 | -10.014 | 1.00 | 114.96 | C |
| ATOM | 1850 | CD1 | LEU | 239 | -69.963 | 67.057 | -9.092  | 1.00 | 114.96 | C |
| ATOM | 1851 | CD2 | LEU | 239 | -69.634 | 68.049 | -11.422 | 1.00 | 114.96 | C |
| ATOM | 1852 | C   | LEU | 239 | -70.932 | 69.782 | -8.603  | 1.00 | 114.96 | C |

|      |      |     |     |     |         |        |         |            |   |
|------|------|-----|-----|-----|---------|--------|---------|------------|---|
| ATOM | 1853 | O   | LEU | 239 | -71.928 | 69.340 | -9.175  | 1.00114.96 | O |
| ATOM | 1854 | N   | LEU | 240 | -70.833 | 69.831 | -7.264  | 1.00 83.95 | N |
| ATOM | 1855 | CA  | LEU | 240 | -71.854 | 69.285 | -6.421  | 1.00 83.95 | C |
| ATOM | 1856 | CB  | LEU | 240 | -71.489 | 69.373 | -4.931  | 1.00 83.95 | C |
| ATOM | 1857 | CG  | LEU | 240 | -70.252 | 68.527 | -4.575  | 1.00 83.95 | C |
| ATOM | 1858 | CD1 | LEU | 240 | -69.902 | 68.626 | -3.088  | 1.00 83.95 | C |
| ATOM | 1859 | CD2 | LEU | 240 | -70.420 | 67.074 | -5.032  | 1.00 83.95 | C |
| ATOM | 1860 | C   | LEU | 240 | -73.142 | 70.023 | -6.633  | 1.00 83.95 | C |
| ATOM | 1861 | O   | LEU | 240 | -74.201 | 69.409 | -6.751  | 1.00 83.95 | O |
| ATOM | 1862 | N   | LEU | 241 | -73.099 | 71.367 | -6.695  | 1.00107.45 | N |
| ATOM | 1863 | CA  | LEU | 241 | -74.328 | 72.079 | -6.897  | 1.00107.45 | C |
| ATOM | 1864 | CB  | LEU | 241 | -74.241 | 73.606 | -6.720  | 1.00107.45 | C |
| ATOM | 1865 | CG  | LEU | 241 | -74.182 | 74.022 | -5.236  | 1.00107.45 | C |
| ATOM | 1866 | CD1 | LEU | 241 | -72.860 | 73.617 | -4.576  | 1.00107.45 | C |
| ATOM | 1867 | CD2 | LEU | 241 | -74.521 | 75.504 | -5.049  | 1.00107.45 | C |
| ATOM | 1868 | C   | LEU | 241 | -74.873 | 71.760 | -8.248  | 1.00107.45 | C |
| ATOM | 1869 | O   | LEU | 241 | -76.085 | 71.650 | -8.428  | 1.00107.45 | O |
| ATOM | 1870 | N   | GLY | 242 | -73.987 | 71.579 | -9.237  | 1.00 30.86 | N |
| ATOM | 1871 | CA  | GLY | 242 | -74.432 | 71.321 | -10.574 | 1.00 30.86 | C |
| ATOM | 1872 | C   | GLY | 242 | -75.231 | 70.054 | -10.608 | 1.00 30.86 | C |
| ATOM | 1873 | O   | GLY | 242 | -76.220 | 69.971 | -11.330 | 1.00 30.86 | O |
| ATOM | 1874 | N   | ARG | 243 | -74.828 | 69.038 | -9.821  | 1.00154.06 | N |
| ATOM | 1875 | CA  | ARG | 243 | -75.439 | 67.734 | -9.860  | 1.00154.06 | C |
| ATOM | 1876 | CB  | ARG | 243 | -74.635 | 66.621 | -9.166  | 1.00154.06 | C |
| ATOM | 1877 | CG  | ARG | 243 | -73.553 | 66.091 | -10.110 | 1.00154.06 | C |
| ATOM | 1878 | CD  | ARG | 243 | -72.970 | 64.727 | -9.743  | 1.00154.06 | C |
| ATOM | 1879 | NE  | ARG | 243 | -71.896 | 64.937 | -8.736  | 1.00154.06 | N |
| ATOM | 1880 | CZ  | ARG | 243 | -70.738 | 64.223 | -8.842  | 1.00154.06 | C |
| ATOM | 1881 | NH1 | ARG | 243 | -70.560 | 63.365 | -9.890  | 1.00154.06 | N |
| ATOM | 1882 | NH2 | ARG | 243 | -69.755 | 64.371 | -7.908  | 1.00154.06 | N |
| ATOM | 1883 | C   | ARG | 243 | -76.864 | 67.719 | -9.401  | 1.00154.06 | C |
| ATOM | 1884 | O   | ARG | 243 | -77.595 | 66.788 | -9.742  | 1.00154.06 | O |
| ATOM | 1885 | N   | MET | 244 | -77.308 | 68.664 | -8.551  | 1.00129.26 | N |
| ATOM | 1886 | CA  | MET | 244 | -78.718 | 68.615 | -8.267  | 1.00129.26 | C |
| ATOM | 1887 | CB  | MET | 244 | -79.112 | 69.582 | -7.140  | 1.00129.26 | C |
| ATOM | 1888 | CG  | MET | 244 | -78.419 | 69.220 | -5.822  | 1.00129.26 | C |
| ATOM | 1889 | SD  | MET | 244 | -78.547 | 70.464 | -4.503  | 1.00129.26 | S |
| ATOM | 1890 | CE  | MET | 244 | -77.383 | 69.642 | -3.374  | 1.00129.26 | C |
| ATOM | 1891 | C   | MET | 244 | -79.381 | 69.027 | -9.564  | 1.00129.26 | C |
| ATOM | 1892 | O   | MET | 244 | -79.081 | 70.106 | -10.054 | 1.00129.26 | O |
| ATOM | 1893 | N   | ASP | 245 | -80.283 | 68.219 | -10.190 | 1.00282.94 | N |
| ATOM | 1894 | CA  | ASP | 245 | -80.758 | 68.651 | -11.500 | 1.00282.94 | C |
| ATOM | 1895 | CB  | ASP | 245 | -79.851 | 68.223 | -12.669 | 1.00282.94 | C |
| ATOM | 1896 | CG  | ASP | 245 | -78.520 | 68.951 | -12.612 | 1.00282.94 | C |
| ATOM | 1897 | OD1 | ASP | 245 | -78.514 | 70.209 | -12.525 | 1.00282.94 | O |
| ATOM | 1898 | OD2 | ASP | 245 | -77.482 | 68.241 | -12.683 | 1.00282.94 | O |
| ATOM | 1899 | C   | ASP | 245 | -82.108 | 68.080 | -11.886 | 1.00282.94 | C |
| ATOM | 1900 | O   | ASP | 245 | -82.785 | 67.432 | -11.092 | 1.00282.94 | O |
| ATOM | 1901 | N   | GLY | 246 | -82.538 | 68.374 | -13.150 | 1.00549.08 | N |
| ATOM | 1902 | CA  | GLY | 246 | -83.782 | 67.927 | -13.751 | 1.00549.08 | C |
| ATOM | 1903 | C   | GLY | 246 | -83.805 | 66.433 | -13.985 | 1.00549.08 | C |
| ATOM | 1904 | O   | GLY | 246 | -84.778 | 65.777 | -13.618 | 1.00549.08 | O |
| ATOM | 1905 | N   | PRO | 247 | -82.813 | 65.890 | -14.661 | 1.00180.47 | N |
| ATOM | 1906 | CA  | PRO | 247 | -82.774 | 64.447 | -14.843 | 1.00180.47 | C |
| ATOM | 1907 | CD  | PRO | 247 | -82.448 | 66.574 | -15.892 | 1.00180.47 | C |
| ATOM | 1908 | CB  | PRO | 247 | -82.308 | 64.195 | -16.275 | 1.00180.47 | C |
| ATOM | 1909 | CG  | PRO | 247 | -82.571 | 65.521 | -17.002 | 1.00180.47 | C |
| ATOM | 1910 | C   | PRO | 247 | -81.830 | 63.812 | -13.856 | 1.00180.47 | C |
| ATOM | 1911 | O   | PRO | 247 | -81.002 | 64.539 | -13.314 | 1.00180.47 | O |
| ATOM | 1912 | N   | ARG | 248 | -81.891 | 62.471 | -13.645 | 1.00 74.17 | N |
| ATOM | 1913 | CA  | ARG | 248 | -80.951 | 61.808 | -12.770 | 1.00 74.17 | C |
| ATOM | 1914 | CB  | ARG | 248 | -81.617 | 60.782 | -11.834 | 1.00 74.17 | C |
| ATOM | 1915 | CG  | ARG | 248 | -82.722 | 61.402 | -10.971 | 1.00 74.17 | C |
| ATOM | 1916 | CD  | ARG | 248 | -83.254 | 60.499 | -9.856  | 1.00 74.17 | C |
| ATOM | 1917 | NE  | ARG | 248 | -84.457 | 61.172 | -9.287  | 1.00 74.17 | N |
| ATOM | 1918 | CZ  | ARG | 248 | -84.318 | 62.218 | -8.421  | 1.00 74.17 | C |

|      |      |     |     |     |         |        |         |            |       |   |
|------|------|-----|-----|-----|---------|--------|---------|------------|-------|---|
| ATOM | 1919 | NH1 | ARG | 248 | -83.072 | 62.663 | -8.082  | 1.00       | 74.17 | N |
| ATOM | 1920 | NH2 | ARG | 248 | -85.424 | 62.829 | -7.904  | 1.00       | 74.17 | N |
| ATOM | 1921 | C   | ARG | 248 | -79.974 | 61.077 | -13.655 | 1.00       | 74.17 | C |
| ATOM | 1922 | O   | ARG | 248 | -80.383 | 60.401 | -14.595 | 1.00       | 74.17 | O |
| ATOM | 1923 | N   | ARG | 249 | -78.652 | 61.186 | -13.375 | 1.00141.55 |       | N |
| ATOM | 1924 | CA  | ARG | 249 | -77.635 | 60.608 | -14.220 | 1.00141.55 |       | C |
| ATOM | 1925 | CB  | ARG | 249 | -76.442 | 61.546 | -14.460 | 1.00141.55 |       | C |
| ATOM | 1926 | CG  | ARG | 249 | -76.783 | 62.840 | -15.194 | 1.00141.55 |       | C |
| ATOM | 1927 | CD  | ARG | 249 | -77.034 | 62.655 | -16.690 | 1.00141.55 |       | C |
| ATOM | 1928 | NE  | ARG | 249 | -76.980 | 64.009 | -17.308 | 1.00141.55 |       | N |
| ATOM | 1929 | CZ  | ARG | 249 | -78.056 | 64.842 | -17.232 | 1.00141.55 |       | C |
| ATOM | 1930 | NH1 | ARG | 249 | -79.189 | 64.438 | -16.586 | 1.00141.55 |       | N |
| ATOM | 1931 | NH2 | ARG | 249 | -77.995 | 66.086 | -17.792 | 1.00141.55 |       | N |
| ATOM | 1932 | C   | ARG | 249 | -77.052 | 59.390 | -13.569 | 1.00141.55 |       | C |
| ATOM | 1933 | O   | ARG | 249 | -76.716 | 59.369 | -12.387 | 1.00141.55 |       | O |
| ATOM | 1934 | N   | PRO | 250 | -76.903 | 58.372 | -14.370 | 1.00173.97 |       | N |
| ATOM | 1935 | CA  | PRO | 250 | -76.370 | 57.135 | -13.866 | 1.00173.97 |       | C |
| ATOM | 1936 | CD  | PRO | 250 | -77.876 | 58.144 | -15.426 | 1.00173.97 |       | C |
| ATOM | 1937 | CB  | PRO | 250 | -76.706 | 56.077 | -14.915 | 1.00173.97 |       | C |
| ATOM | 1938 | CG  | PRO | 250 | -77.993 | 56.617 | -15.563 | 1.00173.97 |       | C |
| ATOM | 1939 | C   | PRO | 250 | -74.919 | 57.184 | -13.488 | 1.00173.97 |       | C |
| ATOM | 1940 | O   | PRO | 250 | -74.149 | 57.874 | -14.154 | 1.00173.97 |       | O |
| ATOM | 1941 | N   | VAL | 251 | -74.557 | 56.426 | -12.427 | 1.00114.67 |       | N |
| ATOM | 1942 | CA  | VAL | 251 | -73.243 | 56.281 | -11.853 | 1.00114.67 |       | C |
| ATOM | 1943 | CB  | VAL | 251 | -73.260 | 55.374 | -10.652 | 1.00114.67 |       | C |
| ATOM | 1944 | CG1 | VAL | 251 | -71.823 | 55.106 | -10.183 | 1.00114.67 |       | C |
| ATOM | 1945 | CG2 | VAL | 251 | -74.194 | 55.949 | -9.583  | 1.00114.67 |       | C |
| ATOM | 1946 | C   | VAL | 251 | -72.392 | 55.542 | -12.842 | 1.00114.67 |       | C |
| ATOM | 1947 | O   | VAL | 251 | -72.876 | 54.657 | -13.543 | 1.00114.67 |       | O |
| ATOM | 1948 | N   | LYS | 252 | -71.092 | 55.892 | -12.935 | 1.00131.23 |       | N |
| ATOM | 1949 | CA  | LYS | 252 | -70.215 | 55.163 | -13.810 | 1.00131.23 |       | C |
| ATOM | 1950 | CB  | LYS | 252 | -69.009 | 55.990 | -14.282 | 1.00131.23 |       | C |
| ATOM | 1951 | CG  | LYS | 252 | -68.215 | 55.311 | -15.396 | 1.00131.23 |       | C |
| ATOM | 1952 | CD  | LYS | 252 | -67.243 | 56.248 | -16.114 | 1.00131.23 |       | C |
| ATOM | 1953 | CE  | LYS | 252 | -66.450 | 55.564 | -17.230 | 1.00131.23 |       | C |
| ATOM | 1954 | NZ  | LYS | 252 | -65.584 | 56.547 | -17.918 | 1.00131.23 |       | N |
| ATOM | 1955 | C   | LYS | 252 | -69.697 | 53.986 | -13.025 | 1.00131.23 |       | C |
| ATOM | 1956 | O   | LYS | 252 | -69.342 | 54.119 | -11.854 | 1.00131.23 |       | O |
| ATOM | 1957 | N   | TYR | 253 | -69.623 | 52.791 | -13.650 | 1.00701.65 |       | N |
| ATOM | 1958 | CA  | TYR | 253 | -69.224 | 51.616 | -12.917 | 1.00701.65 |       | C |
| ATOM | 1959 | CB  | TYR | 253 | -70.144 | 50.395 | -13.123 | 1.00701.65 |       | C |
| ATOM | 1960 | CG  | TYR | 253 | -71.453 | 50.635 | -12.445 | 1.00701.65 |       | C |
| ATOM | 1961 | CD1 | TYR | 253 | -71.594 | 50.403 | -11.095 | 1.00701.65 |       | C |
| ATOM | 1962 | CD2 | TYR | 253 | -72.547 | 51.077 | -13.156 | 1.00701.65 |       | C |
| ATOM | 1963 | CE1 | TYR | 253 | -72.798 | 50.617 | -10.463 | 1.00701.65 |       | C |
| ATOM | 1964 | CE2 | TYR | 253 | -73.754 | 51.290 | -12.530 | 1.00701.65 |       | C |
| ATOM | 1965 | CZ  | TYR | 253 | -73.881 | 51.062 | -11.181 | 1.00701.65 |       | C |
| ATOM | 1966 | OH  | TYR | 253 | -75.118 | 51.282 | -10.537 | 1.00701.65 |       | O |
| ATOM | 1967 | C   | TYR | 253 | -67.827 | 51.183 | -13.276 | 1.00701.65 |       | C |
| ATOM | 1968 | O   | TYR | 253 | -67.431 | 51.207 | -14.440 | 1.00701.65 |       | O |
| ATOM | 1969 | N   | GLU | 254 | -67.041 | 50.786 | -12.245 | 1.00589.77 |       | N |
| ATOM | 1970 | CA  | GLU | 254 | -65.685 | 50.322 | -12.414 | 1.00589.77 |       | C |
| ATOM | 1971 | CB  | GLU | 254 | -64.638 | 51.259 | -11.780 | 1.00589.77 |       | C |
| ATOM | 1972 | CG  | GLU | 254 | -64.565 | 52.651 | -12.411 | 1.00589.77 |       | C |
| ATOM | 1973 | CD  | GLU | 254 | -63.491 | 53.448 | -11.679 | 1.00589.77 |       | C |
| ATOM | 1974 | OE1 | GLU | 254 | -62.288 | 53.255 | -11.993 | 1.00589.77 |       | O |
| ATOM | 1975 | OE2 | GLU | 254 | -63.864 | 54.261 | -10.791 | 1.00589.77 |       | O |
| ATOM | 1976 | C   | GLU | 254 | -65.550 | 49.013 | -11.683 | 1.00589.77 |       | C |
| ATOM | 1977 | O   | GLU | 254 | -66.373 | 48.675 | -10.834 | 1.00589.77 |       | O |
| ATOM | 1978 | N   | GLU | 255 | -64.510 | 48.218 | -12.021 | 1.00665.13 |       | N |
| ATOM | 1979 | CA  | GLU | 255 | -64.298 | 46.964 | -11.345 | 1.00665.13 |       | C |
| ATOM | 1980 | CB  | GLU | 255 | -63.503 | 45.924 | -12.148 | 1.00665.13 |       | C |
| ATOM | 1981 | CG  | GLU | 255 | -64.336 | 45.231 | -13.226 | 1.00665.13 |       | C |
| ATOM | 1982 | CD  | GLU | 255 | -65.294 | 44.264 | -12.539 | 1.00665.13 |       | C |
| ATOM | 1983 | OE1 | GLU | 255 | -66.107 | 44.727 | -11.695 | 1.00665.13 |       | O |
| ATOM | 1984 | OE2 | GLU | 255 | -65.219 | 43.045 | -12.847 | 1.00665.13 |       | O |

|      |      |     |     |     |         |        |         |            |   |
|------|------|-----|-----|-----|---------|--------|---------|------------|---|
| ATOM | 1985 | C   | GLU | 255 | -63.579 | 47.202 | -10.051 | 1.00665.13 | C |
| ATOM | 1986 | O   | GLU | 255 | -62.799 | 48.142 | -9.913  | 1.00665.13 | O |
| ATOM | 1987 | N   | ASP | 256 | -63.848 | 46.323 | -9.064  | 1.00781.74 | N |
| ATOM | 1988 | CA  | ASP | 256 | -63.299 | 46.384 | -7.737  | 1.00781.74 | C |
| ATOM | 1989 | CB  | ASP | 256 | -64.112 | 45.500 | -6.768  | 1.00781.74 | C |
| ATOM | 1990 | CG  | ASP | 256 | -63.810 | 45.850 | -5.320  | 1.00781.74 | C |
| ATOM | 1991 | OD1 | ASP | 256 | -63.118 | 46.874 | -5.080  | 1.00781.74 | O |
| ATOM | 1992 | OD2 | ASP | 256 | -64.279 | 45.090 | -4.429  | 1.00781.74 | O |
| ATOM | 1993 | C   | ASP | 256 | -61.887 | 45.858 | -7.780  | 1.00781.74 | C |
| ATOM | 1994 | O   | ASP | 256 | -61.501 | 45.156 | -8.712  | 1.00781.74 | O |
| ATOM | 1995 | N   | VAL | 257 | -61.073 | 46.200 | -6.756  | 1.00688.30 | N |
| ATOM | 1996 | CA  | VAL | 257 | -59.696 | 45.776 | -6.668  | 1.00688.30 | C |
| ATOM | 1997 | CB  | VAL | 257 | -58.880 | 46.636 | -5.746  | 1.00688.30 | C |
| ATOM | 1998 | CG1 | VAL | 257 | -59.568 | 46.656 | -4.371  | 1.00688.30 | C |
| ATOM | 1999 | CG2 | VAL | 257 | -57.443 | 46.085 | -5.695  | 1.00688.30 | C |
| ATOM | 2000 | C   | VAL | 257 | -59.611 | 44.365 | -6.143  | 1.00688.30 | C |
| ATOM | 2001 | O   | VAL | 257 | -60.439 | 43.939 | -5.341  | 1.00688.30 | O |
| ATOM | 2002 | N   | ASN | 258 | -58.591 | 43.601 | -6.607  | 1.00999.99 | N |
| ATOM | 2003 | CA  | ASN | 258 | -58.364 | 42.240 | -6.186  | 1.00999.99 | C |
| ATOM | 2004 | CB  | ASN | 258 | -58.066 | 41.302 | -7.370  | 1.00999.99 | C |
| ATOM | 2005 | CG  | ASN | 258 | -58.026 | 39.859 | -6.884  | 1.00999.99 | C |
| ATOM | 2006 | OD1 | ASN | 258 | -57.404 | 39.545 | -5.870  | 1.00999.99 | O |
| ATOM | 2007 | ND2 | ASN | 258 | -58.710 | 38.954 | -7.632  | 1.00999.99 | N |
| ATOM | 2008 | C   | ASN | 258 | -57.146 | 42.225 | -5.298  | 1.00999.99 | C |
| ATOM | 2009 | O   | ASN | 258 | -56.017 | 42.383 | -5.759  | 1.00999.99 | O |
| ATOM | 2010 | N   | LEU | 259 | -57.368 | 42.040 | -3.984  | 1.00415.31 | N |
| ATOM | 2011 | CA  | LEU | 259 | -56.377 | 42.025 | -2.940  | 1.00415.31 | C |
| ATOM | 2012 | CB  | LEU | 259 | -56.984 | 42.291 | -1.555  | 1.00415.31 | C |
| ATOM | 2013 | CG  | LEU | 259 | -57.609 | 43.700 | -1.480  | 1.00415.31 | C |
| ATOM | 2014 | CD1 | LEU | 259 | -58.093 | 44.037 | -0.062  | 1.00415.31 | C |
| ATOM | 2015 | CD2 | LEU | 259 | -56.659 | 44.763 | -2.057  | 1.00415.31 | C |
| ATOM | 2016 | C   | LEU | 259 | -55.559 | 40.759 | -2.918  | 1.00415.31 | C |
| ATOM | 2017 | O   | LEU | 259 | -54.511 | 40.707 | -2.271  | 1.00415.31 | O |
| ATOM | 2018 | N   | GLY | 260 | -56.066 | 39.662 | -3.515  | 1.00291.59 | N |
| ATOM | 2019 | CA  | GLY | 260 | -55.285 | 38.454 | -3.550  | 1.00291.59 | C |
| ATOM | 2020 | C   | GLY | 260 | -55.332 | 37.818 | -2.192  | 1.00291.59 | C |
| ATOM | 2021 | O   | GLY | 260 | -56.247 | 38.080 | -1.414  | 1.00291.59 | O |
| ATOM | 2022 | N   | SER | 261 | -54.342 | 36.943 | -1.887  | 1.00999.99 | N |
| ATOM | 2023 | CA  | SER | 261 | -54.297 | 36.265 | -0.615  | 1.00999.99 | C |
| ATOM | 2024 | CB  | SER | 261 | -55.132 | 34.971 | -0.560  | 1.00999.99 | C |
| ATOM | 2025 | OG  | SER | 261 | -56.515 | 35.253 | -0.696  | 1.00999.99 | O |
| ATOM | 2026 | C   | SER | 261 | -52.887 | 35.825 | -0.338  | 1.00999.99 | C |
| ATOM | 2027 | O   | SER | 261 | -52.008 | 35.912 | -1.193  | 1.00999.99 | O |
| ATOM | 2028 | N   | GLY | 262 | -52.643 | 35.333 | 0.896   | 1.00636.60 | N |
| ATOM | 2029 | CA  | GLY | 262 | -51.356 | 34.789 | 1.248   | 1.00636.60 | C |
| ATOM | 2030 | C   | GLY | 262 | -50.577 | 35.749 | 2.084   | 1.00636.60 | C |
| ATOM | 2031 | O   | GLY | 262 | -50.809 | 36.956 | 2.081   | 1.00636.60 | O |
| ATOM | 2032 | N   | THR | 263 | -49.597 | 35.194 | 2.820   | 1.0080.45  | N |
| ATOM | 2033 | CA  | THR | 263 | -48.759 | 35.937 | 3.712   | 1.0080.45  | C |
| ATOM | 2034 | CB  | THR | 263 | -48.157 | 35.054 | 4.762   | 1.0080.45  | C |
| ATOM | 2035 | OG1 | THR | 263 | -47.361 | 34.046 | 4.154   | 1.0080.45  | O |
| ATOM | 2036 | CG2 | THR | 263 | -49.299 | 34.399 | 5.558   | 1.0080.45  | C |
| ATOM | 2037 | C   | THR | 263 | -47.646 | 36.544 | 2.922   | 1.0080.45  | C |
| ATOM | 2038 | O   | THR | 263 | -47.438 | 36.202 | 1.759   | 1.0080.45  | O |
| ATOM | 2039 | N   | ARG | 264 | -46.924 | 37.507 | 3.529   | 1.00315.85 | N |
| ATOM | 2040 | CA  | ARG | 264 | -45.803 | 38.079 | 2.842   | 1.00315.85 | C |
| ATOM | 2041 | CB  | ARG | 264 | -46.048 | 39.479 | 2.247   | 1.00315.85 | C |
| ATOM | 2042 | CG  | ARG | 264 | -46.458 | 40.601 | 3.194   | 1.00315.85 | C |
| ATOM | 2043 | CD  | ARG | 264 | -47.119 | 41.761 | 2.440   | 1.00315.85 | C |
| ATOM | 2044 | NE  | ARG | 264 | -46.294 | 42.054 | 1.229   | 1.00315.85 | N |
| ATOM | 2045 | CZ  | ARG | 264 | -45.474 | 43.144 | 1.155   | 1.00315.85 | C |
| ATOM | 2046 | NH1 | ARG | 264 | -45.371 | 44.013 | 2.200   | 1.00315.85 | N |
| ATOM | 2047 | NH2 | ARG | 264 | -44.762 | 43.380 | 0.016   | 1.00315.85 | N |
| ATOM | 2048 | C   | ARG | 264 | -44.605 | 38.041 | 3.751   | 1.00315.85 | C |
| ATOM | 2049 | O   | ARG | 264 | -44.726 | 38.117 | 4.973   | 1.00315.85 | O |
| ATOM | 2050 | N   | ALA | 265 | -43.402 | 37.887 | 3.159   | 1.00149.16 | N |

|      |      |     |     |     |         |        |        |            |   |
|------|------|-----|-----|-----|---------|--------|--------|------------|---|
| ATOM | 2051 | CA  | ALA | 265 | -42.195 | 37.686 | 3.909  | 1.00149.16 | C |
| ATOM | 2052 | CB  | ALA | 265 | -41.054 | 37.055 | 3.091  | 1.00149.16 | C |
| ATOM | 2053 | C   | ALA | 265 | -41.667 | 38.933 | 4.542  | 1.00149.16 | C |
| ATOM | 2054 | O   | ALA | 265 | -41.788 | 40.041 | 4.030  | 1.00149.16 | O |
| ATOM | 2055 | N   | VAL | 266 | -41.017 | 38.786 | 5.707  | 1.00127.35 | N |
| ATOM | 2056 | CA  | VAL | 266 | -40.503 | 39.981 | 6.292  | 1.00127.35 | C |
| ATOM | 2057 | CB  | VAL | 266 | -40.857 | 40.151 | 7.744  | 1.00127.35 | C |
| ATOM | 2058 | CG1 | VAL | 266 | -40.229 | 41.428 | 8.320  | 1.00127.35 | C |
| ATOM | 2059 | CG2 | VAL | 266 | -42.390 | 40.128 | 7.854  | 1.00127.35 | C |
| ATOM | 2060 | C   | VAL | 266 | -39.030 | 40.038 | 6.030  | 1.00127.35 | C |
| ATOM | 2061 | O   | VAL | 266 | -38.381 | 39.030 | 5.753  | 1.00127.35 | O |
| ATOM | 2062 | N   | ALA | 267 | -38.491 | 41.267 | 6.118  | 1.00 92.11 | N |
| ATOM | 2063 | CA  | ALA | 267 | -37.167 | 41.679 | 5.767  | 1.00 92.11 | C |
| ATOM | 2064 | CB  | ALA | 267 | -36.881 | 43.146 | 6.126  | 1.00 92.11 | C |
| ATOM | 2065 | C   | ALA | 267 | -36.142 | 40.847 | 6.436  | 1.00 92.11 | C |
| ATOM | 2066 | O   | ALA | 267 | -36.432 | 39.862 | 7.106  | 1.00 92.11 | O |
| ATOM | 2067 | N   | SER | 268 | -34.884 | 41.267 | 6.242  | 1.00379.29 | N |
| ATOM | 2068 | CA  | SER | 268 | -33.723 | 40.526 | 6.603  | 1.00379.29 | C |
| ATOM | 2069 | CB  | SER | 268 | -32.445 | 41.383 | 6.525  | 1.00379.29 | C |
| ATOM | 2070 | OG  | SER | 268 | -31.294 | 40.582 | 6.748  | 1.00379.29 | O |
| ATOM | 2071 | C   | SER | 268 | -33.848 | 39.985 | 7.977  | 1.00379.29 | C |
| ATOM | 2072 | O   | SER | 268 | -33.680 | 38.769 | 8.053  | 1.00379.29 | O |
| ATOM | 2073 | N   | CYS | 269 | -34.248 | 40.857 | 8.975  | 1.00461.23 | N |
| ATOM | 2074 | CA  | CYS | 269 | -34.419 | 40.898 | 10.441 | 1.00461.23 | C |
| ATOM | 2075 | CB  | CYS | 269 | -35.367 | 42.032 | 10.864 | 1.00461.23 | C |
| ATOM | 2076 | SG  | CYS | 269 | -37.074 | 41.731 | 10.292 | 1.00461.23 | S |
| ATOM | 2077 | C   | CYS | 269 | -35.024 | 39.671 | 11.003 | 1.00461.23 | C |
| ATOM | 2078 | O   | CYS | 269 | -35.220 | 39.467 | 12.217 | 1.00461.23 | O |
| ATOM | 2079 | N   | ALA | 270 | -35.288 | 38.796 | 10.059 | 1.00290.89 | N |
| ATOM | 2080 | CA  | ALA | 270 | -35.494 | 37.437 | 10.403 | 1.00290.89 | C |
| ATOM | 2081 | CB  | ALA | 270 | -35.561 | 36.506 | 9.179  | 1.00290.89 | C |
| ATOM | 2082 | C   | ALA | 270 | -34.322 | 36.875 | 11.364 | 1.00290.89 | C |
| ATOM | 2083 | O   | ALA | 270 | -33.484 | 37.624 | 11.864 | 1.00290.89 | O |
| ATOM | 2084 | N   | GLU | 271 | -34.228 | 35.540 | 11.740 | 1.00207.61 | N |
| ATOM | 2085 | CA  | GLU | 271 | -33.280 | 34.997 | 12.749 | 1.00207.61 | C |
| ATOM | 2086 | CB  | GLU | 271 | -33.993 | 34.308 | 13.941 | 1.00207.61 | C |
| ATOM | 2087 | CG  | GLU | 271 | -33.040 | 33.521 | 14.855 | 1.00207.61 | C |
| ATOM | 2088 | CD  | GLU | 271 | -33.684 | 33.191 | 16.184 | 1.00207.61 | C |
| ATOM | 2089 | OE1 | GLU | 271 | -34.043 | 34.154 | 16.910 | 1.00207.61 | O |
| ATOM | 2090 | OE2 | GLU | 271 | -33.801 | 31.979 | 16.504 | 1.00207.61 | O |
| ATOM | 2091 | C   | GLU | 271 | -32.241 | 33.980 | 12.226 | 1.00207.61 | C |
| ATOM | 2092 | O   | GLU | 271 | -32.449 | 33.313 | 11.216 | 1.00207.61 | O |
| ATOM | 2093 | N   | ALA | 272 | -31.057 | 33.829 | 12.909 | 1.00 91.90 | N |
| ATOM | 2094 | CA  | ALA | 272 | -30.063 | 32.851 | 12.495 | 1.00 91.90 | C |
| ATOM | 2095 | CB  | ALA | 272 | -28.686 | 33.474 | 12.197 | 1.00 91.90 | C |
| ATOM | 2096 | C   | ALA | 272 | -29.853 | 31.783 | 13.560 | 1.00 91.90 | C |
| ATOM | 2097 | O   | ALA | 272 | -29.313 | 32.040 | 14.637 | 1.00 91.90 | O |
| ATOM | 2098 | N   | PRO | 273 | -30.277 | 30.573 | 13.242 | 1.00145.74 | N |
| ATOM | 2099 | CA  | PRO | 273 | -30.168 | 29.415 | 14.128 | 1.00145.74 | C |
| ATOM | 2100 | CD  | PRO | 273 | -31.473 | 30.482 | 12.422 | 1.00145.74 | C |
| ATOM | 2101 | CB  | PRO | 273 | -31.470 | 28.636 | 13.973 | 1.00145.74 | C |
| ATOM | 2102 | CG  | PRO | 273 | -31.975 | 29.040 | 12.586 | 1.00145.74 | C |
| ATOM | 2103 | C   | PRO | 273 | -28.977 | 28.525 | 13.863 | 1.00145.74 | C |
| ATOM | 2104 | O   | PRO | 273 | -28.178 | 28.849 | 12.986 | 1.00145.74 | O |
| ATOM | 2105 | N   | ASN | 274 | -28.826 | 27.392 | 14.608 | 1.00169.22 | N |
| ATOM | 2106 | CA  | ASN | 274 | -27.740 | 26.486 | 14.281 | 1.00169.22 | C |
| ATOM | 2107 | CB  | ASN | 274 | -26.720 | 26.198 | 15.407 | 1.00169.22 | C |
| ATOM | 2108 | CG  | ASN | 274 | -27.268 | 25.206 | 16.419 | 1.00169.22 | C |
| ATOM | 2109 | OD1 | ASN | 274 | -28.451 | 25.210 | 16.749 | 1.00169.22 | O |
| ATOM | 2110 | ND2 | ASN | 274 | -26.372 | 24.316 | 16.925 | 1.00169.22 | N |
| ATOM | 2111 | C   | ASN | 274 | -28.303 | 25.168 | 13.801 | 1.00169.22 | C |
| ATOM | 2112 | O   | ASN | 274 | -29.202 | 24.589 | 14.404 | 1.00169.22 | O |
| ATOM | 2113 | N   | MET | 275 | -27.804 | 24.703 | 12.636 | 1.00154.68 | N |
| ATOM | 2114 | CA  | MET | 275 | -28.196 | 23.504 | 11.934 | 1.00154.68 | C |
| ATOM | 2115 | CB  | MET | 275 | -27.809 | 23.556 | 10.451 | 1.00154.68 | C |
| ATOM | 2116 | CG  | MET | 275 | -28.907 | 24.212 | 9.616  | 1.00154.68 | C |



|      |      |     |     |     |         |        |        |            |   |
|------|------|-----|-----|-----|---------|--------|--------|------------|---|
| ATOM | 2117 | SD  | MET | 275 | -29.325 | 25.921 | 10.059 | 1.00154.68 | S |
| ATOM | 2118 | CE  | MET | 275 | -30.897 | 25.880 | 9.154  | 1.00154.68 | C |
| ATOM | 2119 | C   | MET | 275 | -27.760 | 22.178 | 12.505 | 1.00154.68 | C |
| ATOM | 2120 | O   | MET | 275 | -28.502 | 21.201 | 12.404 | 1.00154.68 | O |
| ATOM | 2121 | N   | LYS | 276 | -26.565 | 22.083 | 13.116 | 1.00 86.38 | N |
| ATOM | 2122 | CA  | LYS | 276 | -26.032 | 20.791 | 13.472 | 1.00 86.38 | C |
| ATOM | 2123 | CB  | LYS | 276 | -24.657 | 20.896 | 14.158 | 1.00 86.38 | C |
| ATOM | 2124 | CG  | LYS | 276 | -23.551 | 21.378 | 13.211 | 1.00 86.38 | C |
| ATOM | 2125 | CD  | LYS | 276 | -22.258 | 21.800 | 13.914 | 1.00 86.38 | C |
| ATOM | 2126 | CE  | LYS | 276 | -21.116 | 22.122 | 12.947 | 1.00 86.38 | C |
| ATOM | 2127 | NZ  | LYS | 276 | -20.696 | 20.895 | 12.234 | 1.00 86.38 | N |
| ATOM | 2128 | C   | LYS | 276 | -26.964 | 20.047 | 14.383 | 1.00 86.38 | C |
| ATOM | 2129 | O   | LYS | 276 | -27.181 | 18.850 | 14.203 | 1.00 86.38 | O |
| ATOM | 2130 | N   | ILE | 277 | -27.517 | 20.725 | 15.402 | 1.00114.86 | N |
| ATOM | 2131 | CA  | ILE | 277 | -28.419 | 20.117 | 16.343 | 1.00114.86 | C |
| ATOM | 2132 | CB  | ILE | 277 | -28.708 | 21.036 | 17.497 | 1.00114.86 | C |
| ATOM | 2133 | CG1 | ILE | 277 | -27.541 | 21.036 | 18.502 | 1.00114.86 | C |
| ATOM | 2134 | CG2 | ILE | 277 | -30.081 | 20.675 | 18.084 | 1.00114.86 | C |
| ATOM | 2135 | CD1 | ILE | 277 | -26.232 | 21.585 | 17.940 | 1.00114.86 | C |
| ATOM | 2136 | C   | ILE | 277 | -29.741 | 19.744 | 15.728 | 1.00114.86 | C |
| ATOM | 2137 | O   | ILE | 277 | -30.286 | 18.679 | 16.008 | 1.00114.86 | O |
| ATOM | 2138 | N   | ILE | 278 | -30.315 | 20.673 | 14.944 | 1.00215.74 | N |
| ATOM | 2139 | CA  | ILE | 278 | -31.608 | 20.612 | 14.309 | 1.00215.74 | C |
| ATOM | 2140 | CB  | ILE | 278 | -32.051 | 21.961 | 13.823 | 1.00215.74 | C |
| ATOM | 2141 | CG1 | ILE | 278 | -31.997 | 23.024 | 14.926 | 1.00215.74 | C |
| ATOM | 2142 | CG2 | ILE | 278 | -33.469 | 21.790 | 13.281 | 1.00215.74 | C |
| ATOM | 2143 | CD1 | ILE | 278 | -32.189 | 24.444 | 14.391 | 1.00215.74 | C |
| ATOM | 2144 | C   | ILE | 278 | -31.683 | 19.716 | 13.103 | 1.00215.74 | C |
| ATOM | 2145 | O   | ILE | 278 | -32.736 | 19.155 | 12.798 | 1.00215.74 | O |
| ATOM | 2146 | N   | GLY | 279 | -30.576 | 19.594 | 12.353 | 1.00 57.91 | N |
| ATOM | 2147 | CA  | GLY | 279 | -30.600 | 19.012 | 11.035 | 1.00 57.91 | C |
| ATOM | 2148 | C   | GLY | 279 | -31.228 | 17.648 | 10.988 | 1.00 57.91 | C |
| ATOM | 2149 | O   | GLY | 279 | -31.966 | 17.347 | 10.051 | 1.00 57.91 | O |
| ATOM | 2150 | N   | ARG | 280 | -30.963 | 16.781 | 11.974 | 1.00128.19 | N |
| ATOM | 2151 | CA  | ARG | 280 | -31.479 | 15.440 | 11.925 | 1.00128.19 | C |
| ATOM | 2152 | CB  | ARG | 280 | -30.986 | 14.628 | 13.138 | 1.00128.19 | C |
| ATOM | 2153 | CG  | ARG | 280 | -29.488 | 14.328 | 13.016 | 1.00128.19 | C |
| ATOM | 2154 | CD  | ARG | 280 | -28.788 | 13.812 | 14.274 | 1.00128.19 | C |
| ATOM | 2155 | NE  | ARG | 280 | -28.337 | 14.978 | 15.088 | 1.00128.19 | N |
| ATOM | 2156 | CZ  | ARG | 280 | -27.260 | 15.715 | 14.679 | 1.00128.19 | C |
| ATOM | 2157 | NH1 | ARG | 280 | -26.768 | 15.563 | 13.414 | 1.00128.19 | N |
| ATOM | 2158 | NH2 | ARG | 280 | -26.672 | 16.603 | 15.533 | 1.00128.19 | N |
| ATOM | 2159 | C   | ARG | 280 | -32.976 | 15.462 | 11.898 | 1.00128.19 | C |
| ATOM | 2160 | O   | ARG | 280 | -33.603 | 14.726 | 11.135 | 1.00128.19 | O |
| ATOM | 2161 | N   | ARG | 281 | -33.590 | 16.323 | 12.723 | 1.00278.82 | N |
| ATOM | 2162 | CA  | ARG | 281 | -35.022 | 16.397 | 12.803 | 1.00278.82 | C |
| ATOM | 2163 | CB  | ARG | 281 | -35.493 | 17.440 | 13.840 | 1.00278.82 | C |
| ATOM | 2164 | CG  | ARG | 281 | -35.573 | 16.939 | 15.285 | 1.00278.82 | C |
| ATOM | 2165 | CD  | ARG | 281 | -35.573 | 18.048 | 16.345 | 1.00278.82 | C |
| ATOM | 2166 | NE  | ARG | 281 | -34.175 | 18.180 | 16.847 | 1.00278.82 | N |
| ATOM | 2167 | CZ  | ARG | 281 | -33.850 | 19.120 | 17.782 | 1.00278.82 | C |
| ATOM | 2168 | NH1 | ARG | 281 | -34.742 | 20.094 | 18.126 | 1.00278.82 | N |
| ATOM | 2169 | NH2 | ARG | 281 | -32.630 | 19.072 | 18.393 | 1.00278.82 | N |
| ATOM | 2170 | C   | ARG | 281 | -35.611 | 16.825 | 11.491 | 1.00278.82 | C |
| ATOM | 2171 | O   | ARG | 281 | -36.538 | 16.194 | 10.988 | 1.00278.82 | O |
| ATOM | 2172 | N   | ILE | 282 | -35.072 | 17.895 | 10.881 | 1.00169.03 | N |
| ATOM | 2173 | CA  | ILE | 282 | -35.654 | 18.439 | 9.686  | 1.00169.03 | C |
| ATOM | 2174 | CB  | ILE | 282 | -34.940 | 19.673 | 9.220  | 1.00169.03 | C |
| ATOM | 2175 | CG1 | ILE | 282 | -34.962 | 20.744 | 10.322 | 1.00169.03 | C |
| ATOM | 2176 | CG2 | ILE | 282 | -35.598 | 20.137 | 7.910  | 1.00169.03 | C |
| ATOM | 2177 | CD1 | ILE | 282 | -33.998 | 21.899 | 10.065 | 1.00169.03 | C |
| ATOM | 2178 | C   | ILE | 282 | -35.592 | 17.430 | 8.580  | 1.00169.03 | C |
| ATOM | 2179 | O   | ILE | 282 | -36.560 | 17.242 | 7.845  | 1.00169.03 | O |
| ATOM | 2180 | N   | GLU | 283 | -34.449 | 16.735 | 8.445  | 1.00157.52 | N |
| ATOM | 2181 | CA  | GLU | 283 | -34.260 | 15.820 | 7.356  | 1.00157.52 | C |
| ATOM | 2182 | CB  | GLU | 283 | -32.908 | 15.097 | 7.418  | 1.00157.52 | C |

|      |      |     |     |     |         |        |        |            |   |
|------|------|-----|-----|-----|---------|--------|--------|------------|---|
| ATOM | 2183 | CG  | GLU | 283 | -32.761 | 14.069 | 6.301  | 1.00157.52 | C |
| ATOM | 2184 | CD  | GLU | 283 | -32.814 | 14.840 | 4.995  | 1.00157.52 | C |
| ATOM | 2185 | OE1 | GLU | 283 | -33.939 | 15.201 | 4.554  | 1.00157.52 | O |
| ATOM | 2186 | OE2 | GLU | 283 | -31.722 | 15.089 | 4.424  | 1.00157.52 | O |
| ATOM | 2187 | C   | GLU | 283 | -35.294 | 14.746 | 7.398  | 1.00157.52 | C |
| ATOM | 2188 | O   | GLU | 283 | -35.905 | 14.405 | 6.387  | 1.00157.52 | O |
| ATOM | 2189 | N   | ARG | 284 | -35.533 | 14.209 | 8.597  | 1.00693.37 | N |
| ATOM | 2190 | CA  | ARG | 284 | -36.402 | 13.097 | 8.794  | 1.00693.37 | C |
| ATOM | 2191 | CB  | ARG | 284 | -36.417 | 12.759 | 10.294 | 1.00693.37 | C |
| ATOM | 2192 | CG  | ARG | 284 | -37.154 | 11.493 | 10.695 | 1.00693.37 | C |
| ATOM | 2193 | CD  | ARG | 284 | -37.983 | 11.732 | 11.953 | 1.00693.37 | C |
| ATOM | 2194 | NE  | ARG | 284 | -39.224 | 12.423 | 11.498 | 1.00693.37 | N |
| ATOM | 2195 | CZ  | ARG | 284 | -40.156 | 12.838 | 12.403 | 1.00693.37 | C |
| ATOM | 2196 | NH1 | ARG | 284 | -39.898 | 12.708 | 13.735 | 1.00693.37 | N |
| ATOM | 2197 | NH2 | ARG | 284 | -41.340 | 13.367 | 11.973 | 1.00693.37 | N |
| ATOM | 2198 | C   | ARG | 284 | -37.786 | 13.471 | 8.349  | 1.00693.37 | C |
| ATOM | 2199 | O   | ARG | 284 | -38.475 | 12.678 | 7.709  | 1.00693.37 | O |
| ATOM | 2200 | N   | ILE | 285 | -38.232 | 14.692 | 8.701  | 1.00384.26 | N |
| ATOM | 2201 | CA  | ILE | 285 | -39.542 | 15.180 | 8.382  | 1.00384.26 | C |
| ATOM | 2202 | CB  | ILE | 285 | -39.884 | 16.335 | 9.257  | 1.00384.26 | C |
| ATOM | 2203 | CG1 | ILE | 285 | -39.853 | 15.796 | 10.701 | 1.00384.26 | C |
| ATOM | 2204 | CG2 | ILE | 285 | -41.247 | 16.903 | 8.829  | 1.00384.26 | C |
| ATOM | 2205 | CD1 | ILE | 285 | -39.725 | 16.848 | 11.796 | 1.00384.26 | C |
| ATOM | 2206 | C   | ILE | 285 | -39.691 | 15.466 | 6.927  | 1.00384.26 | C |
| ATOM | 2207 | O   | ILE | 285 | -40.737 | 15.217 | 6.330  | 1.00384.26 | O |
| ATOM | 2208 | N   | ARG | 286 | -38.640 | 16.011 | 6.308  | 1.00193.63 | N |
| ATOM | 2209 | CA  | ARG | 286 | -38.716 | 16.312 | 4.914  | 1.00193.63 | C |
| ATOM | 2210 | CB  | ARG | 286 | -37.398 | 16.887 | 4.407  | 1.00193.63 | C |
| ATOM | 2211 | CG  | ARG | 286 | -37.460 | 17.550 | 3.038  | 1.00193.63 | C |
| ATOM | 2212 | CD  | ARG | 286 | -36.053 | 17.940 | 2.622  | 1.00193.63 | C |
| ATOM | 2213 | NE  | ARG | 286 | -35.335 | 18.143 | 3.910  | 1.00193.63 | N |
| ATOM | 2214 | CZ  | ARG | 286 | -34.510 | 19.211 | 4.091  | 1.00193.63 | C |
| ATOM | 2215 | NH1 | ARG | 286 | -34.365 | 20.133 | 3.096  | 1.00193.63 | N |
| ATOM | 2216 | NH2 | ARG | 286 | -33.832 | 19.349 | 5.267  | 1.00193.63 | N |
| ATOM | 2217 | C   | ARG | 286 | -38.952 | 15.032 | 4.180  | 1.00193.63 | C |
| ATOM | 2218 | O   | ARG | 286 | -39.762 | 14.976 | 3.257  | 1.00193.63 | O |
| ATOM | 2219 | N   | ASN | 287 | -38.256 | 13.955 | 4.587  | 1.00246.78 | N |
| ATOM | 2220 | CA  | ASN | 287 | -38.361 | 12.725 | 3.861  | 1.00246.78 | C |
| ATOM | 2221 | CB  | ASN | 287 | -37.395 | 11.640 | 4.381  | 1.00246.78 | C |
| ATOM | 2222 | CG  | ASN | 287 | -37.371 | 10.480 | 3.390  | 1.00246.78 | C |
| ATOM | 2223 | OD1 | ASN | 287 | -37.881 | 9.397  | 3.672  | 1.00246.78 | O |
| ATOM | 2224 | ND2 | ASN | 287 | -36.768 | 10.710 | 2.192  | 1.00246.78 | N |
| ATOM | 2225 | C   | ASN | 287 | -39.766 | 12.190 | 3.908  | 1.00246.78 | C |
| ATOM | 2226 | O   | ASN | 287 | -40.298 | 11.793 | 2.874  | 1.00246.78 | O |
| ATOM | 2227 | N   | GLU | 288 | -40.414 | 12.161 | 5.095  | 1.00943.62 | N |
| ATOM | 2228 | CA  | GLU | 288 | -41.720 | 11.548 | 5.183  | 1.00943.62 | C |
| ATOM | 2229 | CB  | GLU | 288 | -42.179 | 11.248 | 6.612  | 1.00943.62 | C |
| ATOM | 2230 | CG  | GLU | 288 | -42.491 | 9.764  | 6.816  | 1.00943.62 | C |
| ATOM | 2231 | CD  | GLU | 288 | -41.351 | 9.168  | 7.634  | 1.00943.62 | C |
| ATOM | 2232 | OE1 | GLU | 288 | -40.161 | 9.458  | 7.344  | 1.00943.62 | O |
| ATOM | 2233 | OE2 | GLU | 288 | -41.672 | 8.411  | 8.586  | 1.00943.62 | O |
| ATOM | 2234 | C   | GLU | 288 | -42.796 | 12.364 | 4.514  | 1.00943.62 | C |
| ATOM | 2235 | O   | GLU | 288 | -43.741 | 11.829 | 3.939  | 1.00943.62 | O |
| ATOM | 2236 | N   | HIS | 289 | -42.715 | 13.689 | 4.662  | 1.00400.14 | N |
| ATOM | 2237 | CA  | HIS | 289 | -43.614 | 14.677 | 4.145  | 1.00400.14 | C |
| ATOM | 2238 | ND1 | HIS | 289 | -45.520 | 15.706 | 6.921  | 1.00400.14 | N |
| ATOM | 2239 | CG  | HIS | 289 | -44.204 | 15.603 | 6.515  | 1.00400.14 | C |
| ATOM | 2240 | CB  | HIS | 289 | -43.703 | 15.900 | 5.099  | 1.00400.14 | C |
| ATOM | 2241 | NE2 | HIS | 289 | -44.359 | 15.179 | 8.747  | 1.00400.14 | N |
| ATOM | 2242 | CD2 | HIS | 289 | -43.511 | 15.270 | 7.647  | 1.00400.14 | C |
| ATOM | 2243 | CE1 | HIS | 289 | -45.555 | 15.447 | 8.259  | 1.00400.14 | C |
| ATOM | 2244 | C   | HIS | 289 | -43.247 | 15.056 | 2.725  | 1.00400.14 | C |
| ATOM | 2245 | O   | HIS | 289 | -43.772 | 16.023 | 2.180  | 1.00400.14 | O |
| ATOM | 2246 | N   | ALA | 290 | -42.296 | 14.326 | 2.107  | 1.00158.64 | N |
| ATOM | 2247 | CA  | ALA | 290 | -41.623 | 14.640 | 0.868  | 1.00158.64 | C |
| ATOM | 2248 | CB  | ALA | 290 | -40.674 | 13.513 | 0.424  | 1.00158.64 | C |

|      |      |     |     |     |         |        |        |            |   |
|------|------|-----|-----|-----|---------|--------|--------|------------|---|
| ATOM | 2249 | C   | ALA | 290 | -42.528 | 14.924 | -0.298 | 1.00158.64 | C |
| ATOM | 2250 | O   | ALA | 290 | -42.172 | 15.758 | -1.131 | 1.00158.64 | O |
| ATOM | 2251 | N   | GLU | 291 | -43.689 | 14.259 | -0.442 | 1.00130.07 | N |
| ATOM | 2252 | CA  | GLU | 291 | -44.432 | 14.497 | -1.652 | 1.00130.07 | C |
| ATOM | 2253 | CB  | GLU | 291 | -45.696 | 13.617 | -1.757 | 1.00130.07 | C |
| ATOM | 2254 | CG  | GLU | 291 | -46.759 | 13.851 | -0.678 | 1.00130.07 | C |
| ATOM | 2255 | CD  | GLU | 291 | -47.765 | 14.865 | -1.205 | 1.00130.07 | C |
| ATOM | 2256 | OE1 | GLU | 291 | -47.494 | 15.468 | -2.277 | 1.00130.07 | O |
| ATOM | 2257 | OE2 | GLU | 291 | -48.823 | 15.044 | -0.545 | 1.00130.07 | O |
| ATOM | 2258 | C   | GLU | 291 | -44.817 | 15.949 | -1.794 | 1.00130.07 | C |
| ATOM | 2259 | O   | GLU | 291 | -44.610 | 16.537 | -2.855 | 1.00130.07 | O |
| ATOM | 2260 | N   | THR | 292 | -45.402 | 16.553 | -0.741 | 1.00196.01 | N |
| ATOM | 2261 | CA  | THR | 292 | -45.837 | 17.929 | -0.703 | 1.00196.01 | C |
| ATOM | 2262 | CB  | THR | 292 | -47.049 | 18.147 | 0.157  | 1.00196.01 | C |
| ATOM | 2263 | OG1 | THR | 292 | -47.412 | 19.516 | 0.119  | 1.00196.01 | O |
| ATOM | 2264 | CG2 | THR | 292 | -46.771 | 17.705 | 1.598  | 1.00196.01 | C |
| ATOM | 2265 | C   | THR | 292 | -44.769 | 18.946 | -0.346 | 1.00196.01 | C |
| ATOM | 2266 | O   | THR | 292 | -44.989 | 20.145 | -0.515 | 1.00196.01 | O |
| ATOM | 2267 | N   | TRP | 293 | -43.618 | 18.526 | 0.219  | 1.00122.79 | N |
| ATOM | 2268 | CA  | TRP | 293 | -42.623 | 19.432 | 0.755  | 1.00122.79 | C |
| ATOM | 2269 | CB  | TRP | 293 | -41.417 | 18.673 | 1.344  | 1.00122.79 | C |
| ATOM | 2270 | CG  | TRP | 293 | -40.362 | 19.519 | 2.016  | 1.00122.79 | C |
| ATOM | 2271 | CD2 | TRP | 293 | -40.411 | 19.934 | 3.390  | 1.00122.79 | C |
| ATOM | 2272 | CD1 | TRP | 293 | -39.204 | 20.024 | 1.503  | 1.00122.79 | C |
| ATOM | 2273 | NE1 | TRP | 293 | -38.524 | 20.724 | 2.472  | 1.00122.79 | N |
| ATOM | 2274 | CE2 | TRP | 293 | -39.257 | 20.678 | 3.638  | 1.00122.79 | C |
| ATOM | 2275 | CE3 | TRP | 293 | -41.340 | 19.713 | 4.367  | 1.00122.79 | C |
| ATOM | 2276 | CZ2 | TRP | 293 | -39.014 | 21.213 | 4.870  | 1.00122.79 | C |
| ATOM | 2277 | CZ3 | TRP | 293 | -41.091 | 20.256 | 5.607  | 1.00122.79 | C |
| ATOM | 2278 | CH2 | TRP | 293 | -39.951 | 20.991 | 5.854  | 1.00122.79 | C |
| ATOM | 2279 | C   | TRP | 293 | -42.131 | 20.449 | -0.250 | 1.00122.79 | C |
| ATOM | 2280 | O   | TRP | 293 | -41.834 | 20.124 | -1.398 | 1.00122.79 | O |
| ATOM | 2281 | N   | PHE | 294 | -42.051 | 21.736 | 0.188  | 1.00192.59 | N |
| ATOM | 2282 | CA  | PHE | 294 | -41.595 | 22.859 | -0.602 | 1.00192.59 | C |
| ATOM | 2283 | CB  | PHE | 294 | -42.678 | 23.528 | -1.467 | 1.00192.59 | C |
| ATOM | 2284 | CG  | PHE | 294 | -42.859 | 22.819 | -2.762 | 1.00192.59 | C |
| ATOM | 2285 | CD1 | PHE | 294 | -43.742 | 21.774 | -2.900 | 1.00192.59 | C |
| ATOM | 2286 | CD2 | PHE | 294 | -42.134 | 23.233 | -3.855 | 1.00192.59 | C |
| ATOM | 2287 | CE1 | PHE | 294 | -43.889 | 21.150 | -4.117 | 1.00192.59 | C |
| ATOM | 2288 | CE2 | PHE | 294 | -42.277 | 22.614 | -5.073 | 1.00192.59 | C |
| ATOM | 2289 | CZ  | PHE | 294 | -43.157 | 21.568 | -5.204 | 1.00192.59 | C |
| ATOM | 2290 | C   | PHE | 294 | -41.122 | 23.968 | 0.298  | 1.00192.59 | C |
| ATOM | 2291 | O   | PHE | 294 | -41.356 | 23.963 | 1.505  | 1.00192.59 | O |
| ATOM | 2292 | N   | LEU | 295 | -40.434 | 24.974 | -0.291 | 1.00105.66 | N |
| ATOM | 2293 | CA  | LEU | 295 | -39.975 | 26.105 | 0.468  | 1.00105.66 | C |
| ATOM | 2294 | CB  | LEU | 295 | -38.480 | 26.406 | 0.233  | 1.00105.66 | C |
| ATOM | 2295 | CG  | LEU | 295 | -37.893 | 27.556 | 1.076  | 1.00105.66 | C |
| ATOM | 2296 | CD1 | LEU | 295 | -38.429 | 28.929 | 0.645  | 1.00105.66 | C |
| ATOM | 2297 | CD2 | LEU | 295 | -38.077 | 27.285 | 2.578  | 1.00105.66 | C |
| ATOM | 2298 | C   | LEU | 295 | -40.790 | 27.285 | 0.028  | 1.00105.66 | C |
| ATOM | 2299 | O   | LEU | 295 | -40.785 | 27.654 | -1.144 | 1.00105.66 | O |
| ATOM | 2300 | N   | ASP | 296 | -41.514 | 27.912 | 0.978  | 1.0082.42  | N |
| ATOM | 2301 | CA  | ASP | 296 | -42.374 | 29.024 | 0.680  | 1.0082.42  | C |
| ATOM | 2302 | CB  | ASP | 296 | -43.634 | 29.046 | 1.558  | 1.0082.42  | C |
| ATOM | 2303 | CG  | ASP | 296 | -44.619 | 29.997 | 0.909  | 1.0082.42  | C |
| ATOM | 2304 | OD1 | ASP | 296 | -44.218 | 30.660 | -0.084 | 1.0082.42  | O |
| ATOM | 2305 | OD2 | ASP | 296 | -45.782 | 30.073 | 1.388  | 1.0082.42  | O |
| ATOM | 2306 | C   | ASP | 296 | -41.606 | 30.281 | 0.934  | 1.0082.42  | C |
| ATOM | 2307 | O   | ASP | 296 | -41.189 | 30.570 | 2.052  | 1.0082.42  | O |
| ATOM | 2308 | N   | GLU | 297 | -41.412 | 31.073 | -0.129 | 1.00109.86 | N |
| ATOM | 2309 | CA  | GLU | 297 | -40.641 | 32.280 | -0.095 | 1.00109.86 | C |
| ATOM | 2310 | CB  | GLU | 297 | -40.451 | 32.875 | -1.499 | 1.00109.86 | C |
| ATOM | 2311 | CG  | GLU | 297 | -39.618 | 31.982 | -2.422 | 1.00109.86 | C |
| ATOM | 2312 | CD  | GLU | 297 | -38.154 | 32.129 | -2.035 | 1.00109.86 | C |
| ATOM | 2313 | OE1 | GLU | 297 | -37.807 | 33.180 | -1.432 | 1.00109.86 | O |
| ATOM | 2314 | OE2 | GLU | 297 | -37.360 | 31.197 | -2.338 | 1.00109.86 | O |

|      |      |     |     |     |         |        |        |            |   |
|------|------|-----|-----|-----|---------|--------|--------|------------|---|
| ATOM | 2315 | C   | GLU | 297 | -41.309 | 33.311 | 0.764  | 1.00109.86 | C |
| ATOM | 2316 | O   | GLU | 297 | -40.643 | 34.160 | 1.360  | 1.00109.86 | O |
| ATOM | 2317 | N   | ASN | 298 | -42.652 | 33.291 | 0.823  | 1.00200.44 | N |
| ATOM | 2318 | CA  | ASN | 298 | -43.363 | 34.320 | 1.521  | 1.00200.44 | C |
| ATOM | 2319 | CB  | ASN | 298 | -44.625 | 34.714 | 0.748  | 1.00200.44 | C |
| ATOM | 2320 | CG  | ASN | 298 | -45.346 | 33.407 | 0.450  | 1.00200.44 | C |
| ATOM | 2321 | OD1 | ASN | 298 | -45.277 | 32.894 | -0.665 | 1.00200.44 | O |
| ATOM | 2322 | ND2 | ASN | 298 | -46.025 | 32.826 | 1.473  | 1.00200.44 | N |
| ATOM | 2323 | C   | ASN | 298 | -43.789 | 33.900 | 2.895  | 1.00200.44 | C |
| ATOM | 2324 | O   | ASN | 298 | -44.853 | 34.315 | 3.353  | 1.00200.44 | O |
| ATOM | 2325 | N   | HIS | 299 | -42.956 | 33.129 | 3.618  | 1.00159.90 | N |
| ATOM | 2326 | CA  | HIS | 299 | -43.327 | 32.730 | 4.951  | 1.00159.90 | C |
| ATOM | 2327 | ND1 | HIS | 299 | -40.652 | 32.900 | 6.868  | 1.00159.90 | N |
| ATOM | 2328 | CG  | HIS | 299 | -41.022 | 32.129 | 5.789  | 1.00159.90 | C |
| ATOM | 2329 | CB  | HIS | 299 | -42.420 | 31.644 | 5.554  | 1.00159.90 | C |
| ATOM | 2330 | NE2 | HIS | 299 | -38.817 | 32.585 | 5.653  | 1.00159.90 | N |
| ATOM | 2331 | CD2 | HIS | 299 | -39.890 | 31.946 | 5.057  | 1.00159.90 | C |
| ATOM | 2332 | CE1 | HIS | 299 | -39.324 | 33.145 | 6.737  | 1.00159.90 | C |
| ATOM | 2333 | C   | HIS | 299 | -43.211 | 33.954 | 5.829  | 1.00159.90 | C |
| ATOM | 2334 | O   | HIS | 299 | -42.361 | 34.819 | 5.625  | 1.00159.90 | O |
| ATOM | 2335 | N   | PRO | 300 | -44.108 | 34.050 | 6.776  | 1.00197.03 | N |
| ATOM | 2336 | CA  | PRO | 300 | -44.236 | 35.171 | 7.682  | 1.00197.03 | C |
| ATOM | 2337 | CD  | PRO | 300 | -45.302 | 33.225 | 6.750  | 1.00197.03 | C |
| ATOM | 2338 | CB  | PRO | 300 | -45.687 | 35.140 | 8.163  | 1.00197.03 | C |
| ATOM | 2339 | CG  | PRO | 300 | -46.116 | 33.677 | 7.970  | 1.00197.03 | C |
| ATOM | 2340 | C   | PRO | 300 | -43.301 | 35.196 | 8.853  | 1.00197.03 | C |
| ATOM | 2341 | O   | PRO | 300 | -43.395 | 36.127 | 9.651  | 1.00197.03 | O |
| ATOM | 2342 | N   | TYR | 301 | -42.426 | 34.197 | 9.028  | 1.00375.12 | N |
| ATOM | 2343 | CA  | TYR | 301 | -41.698 | 34.156 | 10.267 | 1.00375.12 | C |
| ATOM | 2344 | CB  | TYR | 301 | -41.103 | 32.777 | 10.564 | 1.00375.12 | C |
| ATOM | 2345 | CG  | TYR | 301 | -42.317 | 31.946 | 10.631 | 1.00375.12 | C |
| ATOM | 2346 | CD1 | TYR | 301 | -43.147 | 32.070 | 11.715 | 1.00375.12 | C |
| ATOM | 2347 | CD2 | TYR | 301 | -42.631 | 31.070 | 9.623  | 1.00375.12 | C |
| ATOM | 2348 | CE1 | TYR | 301 | -44.291 | 31.324 | 11.800 | 1.00375.12 | C |
| ATOM | 2349 | CE2 | TYR | 301 | -43.778 | 30.320 | 9.706  | 1.00375.12 | C |
| ATOM | 2350 | CZ  | TYR | 301 | -44.607 | 30.449 | 10.794 | 1.00375.12 | C |
| ATOM | 2351 | OH  | TYR | 301 | -45.786 | 29.684 | 10.883 | 1.00375.12 | O |
| ATOM | 2352 | C   | TYR | 301 | -40.560 | 35.102 | 10.243 | 1.00375.12 | C |
| ATOM | 2353 | O   | TYR | 301 | -39.782 | 35.089 | 9.290  | 1.00375.12 | O |
| ATOM | 2354 | N   | ARG | 302 | -40.552 | 36.081 | 11.181 | 1.00348.13 | N |
| ATOM | 2355 | CA  | ARG | 302 | -39.374 | 36.881 | 11.350 | 1.00348.13 | C |
| ATOM | 2356 | CB  | ARG | 302 | -39.647 | 38.359 | 11.594 | 1.00348.13 | C |
| ATOM | 2357 | CG  | ARG | 302 | -39.840 | 39.023 | 10.247 | 1.00348.13 | C |
| ATOM | 2358 | CD  | ARG | 302 | -38.947 | 38.402 | 9.157  | 1.00348.13 | C |
| ATOM | 2359 | NE  | ARG | 302 | -39.798 | 37.554 | 8.263  | 1.00348.13 | N |
| ATOM | 2360 | CZ  | ARG | 302 | -39.255 | 36.873 | 7.209  | 1.00348.13 | C |
| ATOM | 2361 | NH1 | ARG | 302 | -37.901 | 36.779 | 7.077  | 1.00348.13 | N |
| ATOM | 2362 | NH2 | ARG | 302 | -40.067 | 36.276 | 6.287  | 1.00348.13 | N |
| ATOM | 2363 | C   | ARG | 302 | -38.390 | 36.402 | 12.364 | 1.00348.13 | C |
| ATOM | 2364 | O   | ARG | 302 | -37.218 | 36.217 | 12.082 | 1.00348.13 | O |
| ATOM | 2365 | N   | THR | 303 | -38.831 | 36.181 | 13.605 | 1.00204.50 | N |
| ATOM | 2366 | CA  | THR | 303 | -37.890 | 35.862 | 14.627 | 1.00204.50 | C |
| ATOM | 2367 | CB  | THR | 303 | -38.337 | 36.237 | 16.003 | 1.00204.50 | C |
| ATOM | 2368 | OG1 | THR | 303 | -38.689 | 37.611 | 16.040 | 1.00204.50 | O |
| ATOM | 2369 | CG2 | THR | 303 | -37.142 | 36.022 | 16.938 | 1.00204.50 | C |
| ATOM | 2370 | C   | THR | 303 | -37.536 | 34.413 | 14.586 | 1.00204.50 | C |
| ATOM | 2371 | O   | THR | 303 | -36.507 | 34.037 | 15.136 | 1.00204.50 | O |
| ATOM | 2372 | N   | TRP | 304 | -38.404 | 33.558 | 14.000 | 1.00300.30 | N |
| ATOM | 2373 | CA  | TRP | 304 | -38.174 | 32.131 | 13.960 | 1.00300.30 | C |
| ATOM | 2374 | CB  | TRP | 304 | -39.461 | 31.295 | 14.066 | 1.00300.30 | C |
| ATOM | 2375 | CG  | TRP | 304 | -40.169 | 31.321 | 15.391 | 1.00300.30 | C |
| ATOM | 2376 | CD2 | TRP | 304 | -40.252 | 30.196 | 16.278 | 1.00300.30 | C |
| ATOM | 2377 | CD1 | TRP | 304 | -40.886 | 32.327 | 15.968 | 1.00300.30 | C |
| ATOM | 2378 | NE1 | TRP | 304 | -41.410 | 31.898 | 17.164 | 1.00300.30 | N |
| ATOM | 2379 | CE2 | TRP | 304 | -41.030 | 30.588 | 17.365 | 1.00300.30 | C |
| ATOM | 2380 | CE3 | TRP | 304 | -39.731 | 28.936 | 16.188 | 1.00300.30 | C |

|      |      |         |     |         |        |        |            |   |
|------|------|---------|-----|---------|--------|--------|------------|---|
| ATOM | 2381 | CZ2 TRP | 304 | -41.299 | 29.724 | 18.386 | 1.00300.30 | C |
| ATOM | 2382 | CZ3 TRP | 304 | -39.996 | 28.067 | 17.223 | 1.00300.30 | C |
| ATOM | 2383 | CH2 TRP | 304 | -40.766 | 28.456 | 18.300 | 1.00300.30 | C |
| ATOM | 2384 | C TRP   | 304 | -37.619 | 31.746 | 12.619 | 1.00300.30 | C |
| ATOM | 2385 | O TRP   | 304 | -38.007 | 32.304 | 11.598 | 1.00300.30 | O |
| ATOM | 2386 | N ALA   | 305 | -36.698 | 30.755 | 12.591 | 1.00106.01 | N |
| ATOM | 2387 | CA ALA  | 305 | -36.102 | 30.285 | 11.364 | 1.00106.01 | C |
| ATOM | 2388 | CB ALA  | 305 | -34.786 | 29.524 | 11.577 | 1.00106.01 | C |
| ATOM | 2389 | C ALA   | 305 | -37.057 | 29.350 | 10.675 | 1.00106.01 | C |
| ATOM | 2390 | O ALA   | 305 | -37.654 | 28.479 | 11.305 | 1.00106.01 | O |
| ATOM | 2391 | N TYR   | 306 | -37.178 | 29.486 | 9.335  | 1.00141.34 | N |
| ATOM | 2392 | CA TYR  | 306 | -38.130 | 28.740 | 8.555  | 1.00141.34 | C |
| ATOM | 2393 | CB TYR  | 306 | -38.953 | 29.708 | 7.703  | 1.00141.34 | C |
| ATOM | 2394 | CG TYR  | 306 | -39.834 | 28.947 | 6.796  | 1.00141.34 | C |
| ATOM | 2395 | CD1 TYR | 306 | -41.016 | 28.408 | 7.248  | 1.00141.34 | C |
| ATOM | 2396 | CD2 TYR | 306 | -39.467 | 28.796 | 5.482  | 1.00141.34 | C |
| ATOM | 2397 | CE1 TYR | 306 | -41.825 | 27.713 | 6.384  | 1.00141.34 | C |
| ATOM | 2398 | CE2 TYR | 306 | -40.272 | 28.104 | 4.616  | 1.00141.34 | C |
| ATOM | 2399 | CZ TYR  | 306 | -41.448 | 27.566 | 5.069  | 1.00141.34 | C |
| ATOM | 2400 | OH TYR  | 306 | -42.263 | 26.859 | 4.163  | 1.00141.34 | O |
| ATOM | 2401 | C TYR   | 306 | -37.406 | 27.779 | 7.653  | 1.00141.34 | C |
| ATOM | 2402 | O TYR   | 306 | -36.492 | 28.163 | 6.925  | 1.00141.34 | O |
| ATOM | 2403 | N HIS   | 307 | -37.705 | 26.470 | 7.816  | 1.00131.90 | N |
| ATOM | 2404 | CA HIS  | 307 | -37.155 | 25.382 | 7.047  | 1.00131.90 | C |
| ATOM | 2405 | ND1 HIS | 307 | -34.731 | 24.837 | 9.117  | 1.00131.90 | N |
| ATOM | 2406 | CG HIS  | 307 | -36.096 | 24.661 | 9.135  | 1.00131.90 | C |
| ATOM | 2407 | CB HIS  | 307 | -36.906 | 24.181 | 7.963  | 1.00131.90 | C |
| ATOM | 2408 | NE2 HIS | 307 | -35.428 | 25.498 | 11.123 | 1.00131.90 | N |
| ATOM | 2409 | CD2 HIS | 307 | -36.505 | 25.068 | 10.368 | 1.00131.90 | C |
| ATOM | 2410 | CE1 HIS | 307 | -34.384 | 25.340 | 10.330 | 1.00131.90 | C |
| ATOM | 2411 | C HIS   | 307 | -37.913 | 24.979 | 5.800  | 1.00131.90 | C |
| ATOM | 2412 | O HIS   | 307 | -37.299 | 24.691 | 4.774  | 1.00131.90 | O |
| ATOM | 2413 | N GLY   | 308 | -39.267 | 24.919 | 5.849  | 1.0043.67  | N |
| ATOM | 2414 | CA GLY  | 308 | -40.030 | 24.472 | 4.703  | 1.0043.67  | C |
| ATOM | 2415 | C GLY   | 308 | -41.453 | 24.198 | 5.125  | 1.0043.67  | C |
| ATOM | 2416 | O GLY   | 308 | -41.806 | 24.404 | 6.286  | 1.0043.67  | O |
| ATOM | 2417 | N SER   | 309 | -42.313 | 23.727 | 4.181  | 1.00113.07 | N |
| ATOM | 2418 | CA SER  | 309 | -43.704 | 23.466 | 4.476  | 1.00113.07 | C |
| ATOM | 2419 | CB SER  | 309 | -44.646 | 24.636 | 4.157  | 1.00113.07 | C |
| ATOM | 2420 | OG SER  | 309 | -44.420 | 25.701 | 5.060  | 1.00113.07 | O |
| ATOM | 2421 | C SER   | 309 | -44.226 | 22.315 | 3.662  | 1.00113.07 | C |
| ATOM | 2422 | O SER   | 309 | -43.618 | 21.903 | 2.676  | 1.00113.07 | O |
| ATOM | 2423 | N TYR   | 310 | -45.374 | 21.745 | 4.105  | 1.00269.70 | N |
| ATOM | 2424 | CA TYR  | 310 | -46.079 | 20.693 | 3.419  | 1.00269.70 | C |
| ATOM | 2425 | CB TYR  | 310 | -45.692 | 19.259 | 3.864  | 1.00269.70 | C |
| ATOM | 2426 | CG TYR  | 310 | -45.572 | 19.089 | 5.349  | 1.00269.70 | C |
| ATOM | 2427 | CD1 TYR | 310 | -46.647 | 19.005 | 6.201  | 1.00269.70 | C |
| ATOM | 2428 | CD2 TYR | 310 | -44.320 | 18.968 | 5.899  | 1.00269.70 | C |
| ATOM | 2429 | CE1 TYR | 310 | -46.469 | 18.829 | 7.560  | 1.00269.70 | C |
| ATOM | 2430 | CE2 TYR | 310 | -44.132 | 18.792 | 7.248  | 1.00269.70 | C |
| ATOM | 2431 | CZ TYR  | 310 | -45.209 | 18.724 | 8.091  | 1.00269.70 | C |
| ATOM | 2432 | OH TYR  | 310 | -45.017 | 18.542 | 9.479  | 1.00269.70 | O |
| ATOM | 2433 | C TYR   | 310 | -47.565 | 20.906 | 3.552  | 1.00269.70 | C |
| ATOM | 2434 | O TYR   | 310 | -48.039 | 21.515 | 4.507  | 1.00269.70 | O |
| ATOM | 2435 | N GLU   | 311 | -48.350 | 20.412 | 2.569  | 1.00115.05 | N |
| ATOM | 2436 | CA GLU  | 311 | -49.780 | 20.597 | 2.558  | 1.00115.05 | C |
| ATOM | 2437 | CB GLU  | 311 | -50.428 | 20.180 | 1.226  | 1.00115.05 | C |
| ATOM | 2438 | CG GLU  | 311 | -49.973 | 21.000 | 0.017  | 1.00115.05 | C |
| ATOM | 2439 | CD GLU  | 311 | -50.776 | 22.291 | -0.039 | 1.00115.05 | C |
| ATOM | 2440 | OE1 GLU | 311 | -50.743 | 23.059 | 0.959  | 1.00115.05 | O |
| ATOM | 2441 | OE2 GLU | 311 | -51.435 | 22.523 | -1.087 | 1.00115.05 | O |
| ATOM | 2442 | C GLU   | 311 | -50.398 | 19.747 | 3.626  | 1.00115.05 | C |
| ATOM | 2443 | O GLU   | 311 | -49.927 | 18.648 | 3.914  | 1.00115.05 | O |
| ATOM | 2444 | N ALA   | 312 | -51.489 | 20.256 | 4.242  | 1.00133.78 | N |
| ATOM | 2445 | CA ALA  | 312 | -52.184 | 19.531 | 5.273  | 1.00133.78 | C |
| ATOM | 2446 | CB ALA  | 312 | -51.601 | 19.772 | 6.677  | 1.00133.78 | C |

|      |      |     |     |     |         |        |        |            |   |
|------|------|-----|-----|-----|---------|--------|--------|------------|---|
| ATOM | 2447 | C   | ALA | 312 | -53.605 | 20.027 | 5.304  | 1.00133.78 | C |
| ATOM | 2448 | O   | ALA | 312 | -53.913 | 21.068 | 4.730  | 1.00133.78 | O |
| ATOM | 2449 | N   | PRO | 313 | -54.497 | 19.279 | 5.912  | 1.00103.62 | N |
| ATOM | 2450 | CA  | PRO | 313 | -55.863 | 19.724 | 6.058  | 1.00103.62 | C |
| ATOM | 2451 | CD  | PRO | 313 | -54.411 | 17.831 | 5.846  | 1.00103.62 | C |
| ATOM | 2452 | CB  | PRO | 313 | -56.720 | 18.467 | 6.193  | 1.00103.62 | C |
| ATOM | 2453 | CG  | PRO | 313 | -55.714 | 17.345 | 6.500  | 1.00103.62 | C |
| ATOM | 2454 | C   | PRO | 313 | -55.971 | 20.664 | 7.221  | 1.00103.62 | C |
| ATOM | 2455 | O   | PRO | 313 | -55.145 | 20.582 | 8.127  | 1.00103.62 | O |
| ATOM | 2456 | N   | THR | 314 | -56.988 | 21.551 | 7.236  | 1.00141.02 | N |
| ATOM | 2457 | CA  | THR | 314 | -57.091 | 22.506 | 8.301  | 1.00141.02 | C |
| ATOM | 2458 | CB  | THR | 314 | -57.907 | 23.720 | 7.948  | 1.00141.02 | C |
| ATOM | 2459 | OG1 | THR | 314 | -59.233 | 23.339 | 7.614  | 1.00141.02 | O |
| ATOM | 2460 | CG2 | THR | 314 | -57.245 | 24.453 | 6.770  | 1.00141.02 | C |
| ATOM | 2461 | C   | THR | 314 | -57.751 | 21.878 | 9.479  | 1.00141.02 | C |
| ATOM | 2462 | O   | THR | 314 | -58.631 | 21.031 | 9.352  | 1.00141.02 | O |
| ATOM | 2463 | N   | GLN | 315 | -57.316 | 22.298 | 10.677 | 1.00150.36 | N |
| ATOM | 2464 | CA  | GLN | 315 | -57.892 | 21.806 | 11.887 | 1.00150.36 | C |
| ATOM | 2465 | CB  | GLN | 315 | -56.927 | 20.971 | 12.741 | 1.00150.36 | C |
| ATOM | 2466 | CG  | GLN | 315 | -57.568 | 20.399 | 14.006 | 1.00150.36 | C |
| ATOM | 2467 | CD  | GLN | 315 | -56.478 | 19.676 | 14.778 | 1.00150.36 | C |
| ATOM | 2468 | OE1 | GLN | 315 | -55.298 | 19.999 | 14.650 | 1.00150.36 | O |
| ATOM | 2469 | NE2 | GLN | 315 | -56.875 | 18.671 | 15.605 | 1.00150.36 | N |
| ATOM | 2470 | C   | GLN | 315 | -58.254 | 23.027 | 12.679 | 1.00150.36 | C |
| ATOM | 2471 | O   | GLN | 315 | -57.948 | 24.149 | 12.281 | 1.00150.36 | O |
| ATOM | 2472 | N   | GLY | 316 | -58.958 | 22.850 | 13.811 | 1.0068.11  | N |
| ATOM | 2473 | CA  | GLY | 316 | -59.252 | 23.983 | 14.643 | 1.0068.11  | C |
| ATOM | 2474 | C   | GLY | 316 | -60.652 | 24.454 | 14.406 | 1.0068.11  | C |
| ATOM | 2475 | O   | GLY | 316 | -61.278 | 24.113 | 13.401 | 1.0068.11  | O |
| ATOM | 2476 | N   | SER | 317 | -61.168 | 25.272 | 15.354 | 1.00110.53 | N |
| ATOM | 2477 | CA  | SER | 317 | -62.525 | 25.740 | 15.284 | 1.00110.53 | C |
| ATOM | 2478 | CB  | SER | 317 | -63.443 | 25.059 | 16.316 | 1.00110.53 | C |
| ATOM | 2479 | OG  | SER | 317 | -64.734 | 25.650 | 16.301 | 1.00110.53 | O |
| ATOM | 2480 | C   | SER | 317 | -62.598 | 27.211 | 15.591 | 1.00110.53 | C |
| ATOM | 2481 | O   | SER | 317 | -61.856 | 27.736 | 16.418 | 1.00110.53 | O |
| ATOM | 2482 | N   | ALA | 318 | -63.419 | 27.921 | 14.796 | 1.00321.67 | N |
| ATOM | 2483 | CA  | ALA | 318 | -63.827 | 29.296 | 14.906 | 1.00321.67 | C |
| ATOM | 2484 | CB  | ALA | 318 | -64.303 | 29.867 | 13.559 | 1.00321.67 | C |
| ATOM | 2485 | C   | ALA | 318 | -64.956 | 29.511 | 15.868 | 1.00321.67 | C |
| ATOM | 2486 | O   | ALA | 318 | -65.149 | 30.613 | 16.373 | 1.00321.67 | O |
| ATOM | 2487 | N   | SER | 319 | -65.802 | 28.484 | 16.047 | 1.00283.51 | N |
| ATOM | 2488 | CA  | SER | 319 | -67.067 | 28.657 | 16.705 | 1.00283.51 | C |
| ATOM | 2489 | CB  | SER | 319 | -68.036 | 27.486 | 16.472 | 1.00283.51 | C |
| ATOM | 2490 | OG  | SER | 319 | -67.578 | 26.335 | 17.169 | 1.00283.51 | O |
| ATOM | 2491 | C   | SER | 319 | -66.985 | 28.811 | 18.183 | 1.00283.51 | C |
| ATOM | 2492 | O   | SER | 319 | -66.042 | 28.380 | 18.843 | 1.00283.51 | O |
| ATOM | 2493 | N   | SER | 320 | -68.026 | 29.487 | 18.710 | 1.00299.20 | N |
| ATOM | 2494 | CA  | SER | 320 | -68.301 | 29.616 | 20.105 | 1.00299.20 | C |
| ATOM | 2495 | CB  | SER | 320 | -67.953 | 31.005 | 20.667 | 1.00299.20 | C |
| ATOM | 2496 | OG  | SER | 320 | -68.615 | 32.014 | 19.920 | 1.00299.20 | O |
| ATOM | 2497 | C   | SER | 320 | -69.782 | 29.396 | 20.202 | 1.00299.20 | C |
| ATOM | 2498 | O   | SER | 320 | -70.572 | 30.114 | 19.588 | 1.00299.20 | O |
| ATOM | 2499 | N   | LEU | 321 | -70.204 | 28.369 | 20.962 | 1.00179.91 | N |
| ATOM | 2500 | CA  | LEU | 321 | -71.606 | 28.099 | 21.042 | 1.00179.91 | C |
| ATOM | 2501 | CB  | LEU | 321 | -71.973 | 26.658 | 20.670 | 1.00179.91 | C |
| ATOM | 2502 | CG  | LEU | 321 | -71.473 | 26.320 | 19.255 | 1.00179.91 | C |
| ATOM | 2503 | CD1 | LEU | 321 | -69.948 | 26.151 | 19.231 | 1.00179.91 | C |
| ATOM | 2504 | CD2 | LEU | 321 | -72.214 | 25.130 | 18.649 | 1.00179.91 | C |
| ATOM | 2505 | C   | LEU | 321 | -72.018 | 28.365 | 22.441 | 1.00179.91 | C |
| ATOM | 2506 | O   | LEU | 321 | -71.203 | 28.309 | 23.360 | 1.00179.91 | O |
| ATOM | 2507 | N   | VAL | 322 | -73.306 | 28.706 | 22.616 | 1.0081.91  | N |
| ATOM | 2508 | CA  | VAL | 322 | -73.811 | 29.053 | 23.908 | 1.0081.91  | C |
| ATOM | 2509 | CB  | VAL | 322 | -74.917 | 30.068 | 23.831 | 1.0081.91  | C |
| ATOM | 2510 | CG1 | VAL | 322 | -75.423 | 30.377 | 25.248 | 1.0081.91  | C |
| ATOM | 2511 | CG2 | VAL | 322 | -74.392 | 31.299 | 23.074 | 1.0081.91  | C |
| ATOM | 2512 | C   | VAL | 322 | -74.348 | 27.830 | 24.584 | 1.0081.91  | C |

|      |      |     |     |     |         |        |        |      |        |   |
|------|------|-----|-----|-----|---------|--------|--------|------|--------|---|
| ATOM | 2513 | O   | VAL | 322 | -74.952 | 26.965 | 23.953 | 1.00 | 81.91  | O |
| ATOM | 2514 | N   | ASN | 323 | -74.123 | 27.738 | 25.910 | 1.00 | 168.97 | N |
| ATOM | 2515 | CA  | ASN | 323 | -74.636 | 26.666 | 26.712 | 1.00 | 168.97 | C |
| ATOM | 2516 | CB  | ASN | 323 | -73.861 | 26.523 | 28.036 | 1.00 | 168.97 | C |
| ATOM | 2517 | CG  | ASN | 323 | -74.241 | 25.221 | 28.723 | 1.00 | 168.97 | C |
| ATOM | 2518 | OD1 | ASN | 323 | -75.419 | 24.936 | 28.932 | 1.00 | 168.97 | O |
| ATOM | 2519 | ND2 | ASN | 323 | -73.212 | 24.408 | 29.088 | 1.00 | 168.97 | N |
| ATOM | 2520 | C   | ASN | 323 | -76.045 | 27.063 | 27.021 | 1.00 | 168.97 | C |
| ATOM | 2521 | O   | ASN | 323 | -76.293 | 27.967 | 27.817 | 1.00 | 168.97 | O |
| ATOM | 2522 | N   | GLY | 324 | -77.011 | 26.371 | 26.391 | 1.00 | 46.58  | N |
| ATOM | 2523 | CA  | GLY | 324 | -78.399 | 26.721 | 26.487 | 1.00 | 46.58  | C |
| ATOM | 2524 | C   | GLY | 324 | -78.889 | 26.614 | 27.894 | 1.00 | 46.58  | C |
| ATOM | 2525 | O   | GLY | 324 | -79.722 | 27.409 | 28.324 | 1.00 | 46.58  | O |
| ATOM | 2526 | N   | VAL | 325 | -78.434 | 25.601 | 28.647 | 1.00 | 140.13 | N |
| ATOM | 2527 | CA  | VAL | 325 | -78.984 | 25.455 | 29.962 | 1.00 | 140.13 | C |
| ATOM | 2528 | CB  | VAL | 325 | -78.613 | 24.154 | 30.611 | 1.00 | 140.13 | C |
| ATOM | 2529 | CG1 | VAL | 325 | -77.126 | 24.167 | 30.939 | 1.00 | 140.13 | C |
| ATOM | 2530 | CG2 | VAL | 325 | -79.511 | 23.936 | 31.833 | 1.00 | 140.13 | C |
| ATOM | 2531 | C   | VAL | 325 | -78.608 | 26.613 | 30.848 | 1.00 | 140.13 | C |
| ATOM | 2532 | O   | VAL | 325 | -79.475 | 27.216 | 31.476 | 1.00 | 140.13 | O |
| ATOM | 2533 | N   | VAL | 326 | -77.317 | 26.995 | 30.892 | 1.00 | 60.30  | N |
| ATOM | 2534 | CA  | VAL | 326 | -76.861 | 28.066 | 31.742 | 1.00 | 60.30  | C |
| ATOM | 2535 | CB  | VAL | 326 | -75.382 | 28.302 | 31.634 | 1.00 | 60.30  | C |
| ATOM | 2536 | CG1 | VAL | 326 | -75.010 | 29.504 | 32.518 | 1.00 | 60.30  | C |
| ATOM | 2537 | CG2 | VAL | 326 | -74.644 | 27.007 | 32.004 | 1.00 | 60.30  | C |
| ATOM | 2538 | C   | VAL | 326 | -77.525 | 29.347 | 31.330 | 1.00 | 60.30  | C |
| ATOM | 2539 | O   | VAL | 326 | -77.896 | 30.162 | 32.174 | 1.00 | 60.30  | O |
| ATOM | 2540 | N   | ARG | 327 | -77.683 | 29.564 | 30.011 | 1.00 | 68.08  | N |
| ATOM | 2541 | CA  | ARG | 327 | -78.224 | 30.796 | 29.510 | 1.00 | 68.08  | C |
| ATOM | 2542 | CB  | ARG | 327 | -78.215 | 30.860 | 27.974 | 1.00 | 68.08  | C |
| ATOM | 2543 | CG  | ARG | 327 | -78.538 | 32.246 | 27.416 | 1.00 | 68.08  | C |
| ATOM | 2544 | CD  | ARG | 327 | -78.262 | 32.370 | 25.916 | 1.00 | 68.08  | C |
| ATOM | 2545 | NE  | ARG | 327 | -78.430 | 33.801 | 25.538 | 1.00 | 68.08  | N |
| ATOM | 2546 | CZ  | ARG | 327 | -79.606 | 34.235 | 25.000 | 1.00 | 68.08  | C |
| ATOM | 2547 | NH1 | ARG | 327 | -80.614 | 33.345 | 24.773 | 1.00 | 68.08  | N |
| ATOM | 2548 | NH2 | ARG | 327 | -79.769 | 35.553 | 24.681 | 1.00 | 68.08  | N |
| ATOM | 2549 | C   | ARG | 327 | -79.637 | 30.993 | 29.975 | 1.00 | 68.08  | C |
| ATOM | 2550 | O   | ARG | 327 | -80.006 | 32.087 | 30.400 | 1.00 | 68.08  | O |
| ATOM | 2551 | N   | LEU | 328 | -80.466 | 29.934 | 29.921 | 1.00 | 117.17 | N |
| ATOM | 2552 | CA  | LEU | 328 | -81.847 | 30.044 | 30.313 | 1.00 | 117.17 | C |
| ATOM | 2553 | CB  | LEU | 328 | -82.676 | 28.771 | 30.050 | 1.00 | 117.17 | C |
| ATOM | 2554 | CG  | LEU | 328 | -83.163 | 28.606 | 28.594 | 1.00 | 117.17 | C |
| ATOM | 2555 | CD1 | LEU | 328 | -84.288 | 29.603 | 28.274 | 1.00 | 117.17 | C |
| ATOM | 2556 | CD2 | LEU | 328 | -82.016 | 28.700 | 27.580 | 1.00 | 117.17 | C |
| ATOM | 2557 | C   | LEU | 328 | -81.945 | 30.381 | 31.772 | 1.00 | 117.17 | C |
| ATOM | 2558 | O   | LEU | 328 | -82.880 | 31.054 | 32.198 | 1.00 | 117.17 | O |
| ATOM | 2559 | N   | LEU | 329 | -81.025 | 29.844 | 32.588 | 1.00 | 181.15 | N |
| ATOM | 2560 | CA  | LEU | 329 | -80.973 | 30.078 | 34.005 | 1.00 | 181.15 | C |
| ATOM | 2561 | CB  | LEU | 329 | -80.257 | 28.988 | 34.819 | 1.00 | 181.15 | C |
| ATOM | 2562 | CG  | LEU | 329 | -81.089 | 27.698 | 34.939 | 1.00 | 181.15 | C |
| ATOM | 2563 | CD1 | LEU | 329 | -81.117 | 26.888 | 33.640 | 1.00 | 181.15 | C |
| ATOM | 2564 | CD2 | LEU | 329 | -80.664 | 26.873 | 36.155 | 1.00 | 181.15 | C |
| ATOM | 2565 | C   | LEU | 329 | -80.392 | 31.414 | 34.373 | 1.00 | 181.15 | C |
| ATOM | 2566 | O   | LEU | 329 | -80.373 | 31.751 | 35.557 | 1.00 | 181.15 | O |
| ATOM | 2567 | N   | SER | 330 | -79.765 | 32.129 | 33.416 | 1.00 | 180.81 | N |
| ATOM | 2568 | CA  | SER | 330 | -79.120 | 33.385 | 33.709 | 1.00 | 180.81 | C |
| ATOM | 2569 | CB  | SER | 330 | -77.619 | 33.225 | 33.389 | 1.00 | 180.81 | C |
| ATOM | 2570 | OG  | SER | 330 | -76.908 | 34.443 | 33.496 | 1.00 | 180.81 | O |
| ATOM | 2571 | C   | SER | 330 | -79.681 | 34.469 | 32.815 | 1.00 | 180.81 | C |
| ATOM | 2572 | O   | SER | 330 | -78.948 | 35.144 | 32.096 | 1.00 | 180.81 | O |
| ATOM | 2573 | N   | LYS | 331 | -80.994 | 34.741 | 32.898 | 1.00 | 87.68  | N |
| ATOM | 2574 | CA  | LYS | 331 | -81.607 | 35.685 | 32.001 | 1.00 | 87.68  | C |
| ATOM | 2575 | CB  | LYS | 331 | -83.141 | 35.709 | 32.115 | 1.00 | 87.68  | C |
| ATOM | 2576 | CG  | LYS | 331 | -83.805 | 36.625 | 31.085 | 1.00 | 87.68  | C |
| ATOM | 2577 | CD  | LYS | 331 | -85.295 | 36.339 | 30.889 | 1.00 | 87.68  | C |
| ATOM | 2578 | CE  | LYS | 331 | -85.559 | 35.103 | 30.028 | 1.00 | 87.68  | C |

|      |      |     |     |     |         |        |        |      |        |   |
|------|------|-----|-----|-----|---------|--------|--------|------|--------|---|
| ATOM | 2579 | NZ  | LYS | 331 | -87.006 | 34.795 | 30.007 | 1.00 | 87.68  | N |
| ATOM | 2580 | C   | LYS | 331 | -81.109 | 37.094 | 32.195 | 1.00 | 87.68  | C |
| ATOM | 2581 | O   | LYS | 331 | -80.876 | 37.786 | 31.205 | 1.00 | 87.68  | O |
| ATOM | 2582 | N   | PRO | 332 | -80.926 | 37.566 | 33.399 | 1.00 | 89.83  | N |
| ATOM | 2583 | CA  | PRO | 332 | -80.535 | 38.941 | 33.589 | 1.00 | 89.83  | C |
| ATOM | 2584 | CD  | PRO | 332 | -81.668 | 37.048 | 34.537 | 1.00 | 89.83  | C |
| ATOM | 2585 | CB  | PRO | 332 | -80.652 | 39.193 | 35.088 | 1.00 | 89.83  | C |
| ATOM | 2586 | CG  | PRO | 332 | -81.761 | 38.220 | 35.529 | 1.00 | 89.83  | C |
| ATOM | 2587 | C   | PRO | 332 | -79.195 | 39.261 | 33.009 | 1.00 | 89.83  | C |
| ATOM | 2588 | O   | PRO | 332 | -78.955 | 40.412 | 32.648 | 1.00 | 89.83  | O |
| ATOM | 2589 | N   | TRP | 333 | -78.310 | 38.262 | 32.927 | 1.00 | 147.80 | N |
| ATOM | 2590 | CA  | TRP | 333 | -76.988 | 38.409 | 32.401 | 1.00 | 147.80 | C |
| ATOM | 2591 | CB  | TRP | 333 | -76.041 | 37.264 | 32.780 | 1.00 | 147.80 | C |
| ATOM | 2592 | CG  | TRP | 333 | -75.584 | 37.390 | 34.212 | 1.00 | 147.80 | C |
| ATOM | 2593 | CD2 | TRP | 333 | -76.330 | 36.944 | 35.355 | 1.00 | 147.80 | C |
| ATOM | 2594 | CD1 | TRP | 333 | -74.441 | 37.955 | 34.694 | 1.00 | 147.80 | C |
| ATOM | 2595 | NE1 | TRP | 333 | -74.424 | 37.886 | 36.065 | 1.00 | 147.80 | N |
| ATOM | 2596 | CE2 | TRP | 333 | -75.582 | 37.267 | 36.486 | 1.00 | 147.80 | C |
| ATOM | 2597 | CE3 | TRP | 333 | -77.541 | 36.323 | 35.455 | 1.00 | 147.80 | C |
| ATOM | 2598 | CZ2 | TRP | 333 | -76.032 | 36.968 | 37.740 | 1.00 | 147.80 | C |
| ATOM | 2599 | CH3 | TRP | 333 | -77.990 | 36.019 | 36.721 | 1.00 | 147.80 | C |
| ATOM | 2600 | CG2 | TRP | 333 | -77.251 | 36.335 | 37.841 | 1.00 | 147.80 | C |
| ATOM | 2601 | C   | TRP | 333 | -77.023 | 38.593 | 30.923 | 1.00 | 147.80 | C |
| ATOM | 2602 | O   | TRP | 333 | -75.998 | 38.891 | 30.318 | 1.00 | 147.80 | O |
| ATOM | 2603 | N   | ASP | 334 | -78.183 | 38.350 | 30.287 | 1.00 | 82.12  | N |
| ATOM | 2604 | CA  | ASP | 334 | -78.273 | 38.462 | 28.858 | 1.00 | 82.12  | C |
| ATOM | 2605 | CB  | ASP | 334 | -79.691 | 38.186 | 28.329 | 1.00 | 82.12  | C |
| ATOM | 2606 | CG  | ASP | 334 | -79.975 | 36.700 | 28.505 | 1.00 | 82.12  | C |
| ATOM | 2607 | OD1 | ASP | 334 | -79.047 | 35.965 | 28.935 | 1.00 | 82.12  | O |
| ATOM | 2608 | OD2 | ASP | 334 | -81.124 | 36.279 | 28.208 | 1.00 | 82.12  | O |
| ATOM | 2609 | C   | ASP | 334 | -77.874 | 39.846 | 28.410 | 1.00 | 82.12  | C |
| ATOM | 2610 | O   | ASP | 334 | -77.198 | 39.995 | 27.395 | 1.00 | 82.12  | O |
| ATOM | 2611 | N   | VAL | 335 | -78.294 | 40.914 | 29.114 | 1.00 | 141.09 | N |
| ATOM | 2612 | CA  | VAL | 335 | -77.933 | 42.233 | 28.661 | 1.00 | 141.09 | C |
| ATOM | 2613 | CB  | VAL | 335 | -78.751 | 43.345 | 29.258 | 1.00 | 141.09 | C |
| ATOM | 2614 | CG1 | VAL | 335 | -80.205 | 43.166 | 28.795 | 1.00 | 141.09 | C |
| ATOM | 2615 | CG2 | VAL | 335 | -78.568 | 43.364 | 30.783 | 1.00 | 141.09 | C |
| ATOM | 2616 | C   | VAL | 335 | -76.467 | 42.541 | 28.865 | 1.00 | 141.09 | C |
| ATOM | 2617 | O   | VAL | 335 | -75.861 | 43.210 | 28.031 | 1.00 | 141.09 | O |
| ATOM | 2618 | N   | VAL | 336 | -75.856 | 42.036 | 29.961 | 1.00 | 103.56 | N |
| ATOM | 2619 | CA  | VAL | 336 | -74.532 | 42.412 | 30.397 | 1.00 | 103.56 | C |
| ATOM | 2620 | CB  | VAL | 336 | -74.092 | 41.643 | 31.606 | 1.00 | 103.56 | C |
| ATOM | 2621 | CG1 | VAL | 336 | -72.671 | 42.083 | 31.987 | 1.00 | 103.56 | C |
| ATOM | 2622 | CG2 | VAL | 336 | -75.134 | 41.857 | 32.717 | 1.00 | 103.56 | C |
| ATOM | 2623 | C   | VAL | 336 | -73.497 | 42.238 | 29.323 | 1.00 | 103.56 | C |
| ATOM | 2624 | O   | VAL | 336 | -73.319 | 41.164 | 28.749 | 1.00 | 103.56 | O |
| ATOM | 2625 | N   | THR | 337 | -72.740 | 43.331 | 29.084 | 1.00 | 209.06 | N |
| ATOM | 2626 | CA  | THR | 337 | -71.733 | 43.423 | 28.064 | 1.00 | 209.06 | C |
| ATOM | 2627 | CB  | THR | 337 | -71.057 | 44.761 | 28.060 | 1.00 | 209.06 | C |
| ATOM | 2628 | OG1 | THR | 337 | -71.996 | 45.800 | 27.830 | 1.00 | 209.06 | O |
| ATOM | 2629 | CG2 | THR | 337 | -69.981 | 44.754 | 26.967 | 1.00 | 209.06 | C |
| ATOM | 2630 | C   | THR | 337 | -70.638 | 42.435 | 28.306 | 1.00 | 209.06 | C |
| ATOM | 2631 | O   | THR | 337 | -70.213 | 41.726 | 27.395 | 1.00 | 209.06 | O |
| ATOM | 2632 | N   | GLY | 338 | -70.157 | 42.357 | 29.558 | 1.00 | 132.02 | N |
| ATOM | 2633 | CA  | GLY | 338 | -69.022 | 41.532 | 29.831 | 1.00 | 132.02 | C |
| ATOM | 2634 | C   | GLY | 338 | -69.324 | 40.097 | 29.529 | 1.00 | 132.02 | C |
| ATOM | 2635 | O   | GLY | 338 | -68.498 | 39.402 | 28.942 | 1.00 | 132.02 | O |
| ATOM | 2636 | N   | VAL | 339 | -70.500 | 39.594 | 29.945 | 1.00 | 190.11 | N |
| ATOM | 2637 | CA  | VAL | 339 | -70.773 | 38.203 | 29.713 | 1.00 | 190.11 | C |
| ATOM | 2638 | CB  | VAL | 339 | -71.950 | 37.655 | 30.473 | 1.00 | 190.11 | C |
| ATOM | 2639 | CG1 | VAL | 339 | -71.606 | 37.659 | 31.970 | 1.00 | 190.11 | C |
| ATOM | 2640 | CG2 | VAL | 339 | -73.211 | 38.455 | 30.113 | 1.00 | 190.11 | C |
| ATOM | 2641 | C   | VAL | 339 | -70.998 | 37.921 | 28.264 | 1.00 | 190.11 | C |
| ATOM | 2642 | O   | VAL | 339 | -70.534 | 36.912 | 27.736 | 1.00 | 190.11 | O |
| ATOM | 2643 | N   | THR | 340 | -71.724 | 38.824 | 27.587 | 1.00 | 238.95 | N |
| ATOM | 2644 | CA  | THR | 340 | -72.140 | 38.630 | 26.231 | 1.00 | 238.95 | C |



|      |      |     |     |     |         |        |        |            |   |
|------|------|-----|-----|-----|---------|--------|--------|------------|---|
| ATOM | 2645 | CB  | THR | 340 | -72.979 | 39.770 | 25.730 | 1.00238.95 | C |
| ATOM | 2646 | OG1 | THR | 340 | -74.123 | 39.943 | 26.550 | 1.00238.95 | O |
| ATOM | 2647 | CG2 | THR | 340 | -73.399 | 39.477 | 24.281 | 1.00238.95 | C |
| ATOM | 2648 | C   | THR | 340 | -70.972 | 38.570 | 25.304 | 1.00238.95 | C |
| ATOM | 2649 | O   | THR | 340 | -70.966 | 37.760 | 24.380 | 1.00238.95 | O |
| ATOM | 2650 | N   | GLY | 341 | -69.977 | 39.446 | 25.533 | 1.00411.25 | N |
| ATOM | 2651 | CA  | GLY | 341 | -68.821 | 39.637 | 24.698 | 1.00411.25 | C |
| ATOM | 2652 | C   | GLY | 341 | -67.956 | 38.416 | 24.646 | 1.00411.25 | C |
| ATOM | 2653 | O   | GLY | 341 | -67.275 | 38.191 | 23.650 | 1.00411.25 | O |
| ATOM | 2654 | N   | ILE | 342 | -67.914 | 37.624 | 25.732 | 1.00527.50 | N |
| ATOM | 2655 | CA  | ILE | 342 | -67.027 | 36.490 | 25.819 | 1.00527.50 | C |
| ATOM | 2656 | CB  | ILE | 342 | -67.119 | 35.749 | 27.124 | 1.00527.50 | C |
| ATOM | 2657 | CG1 | ILE | 342 | -66.630 | 36.633 | 28.283 | 1.00527.50 | C |
| ATOM | 2658 | CG2 | ILE | 342 | -66.347 | 34.427 | 26.983 | 1.00527.50 | C |
| ATOM | 2659 | CD1 | ILE | 342 | -66.907 | 36.034 | 29.661 | 1.00527.50 | C |
| ATOM | 2660 | C   | ILE | 342 | -67.275 | 35.493 | 24.725 | 1.00527.50 | C |
| ATOM | 2661 | O   | ILE | 342 | -68.410 | 35.256 | 24.315 | 1.00527.50 | O |
| ATOM | 2662 | N   | ALA | 343 | -66.179 | 34.894 | 24.201 | 1.00732.31 | N |
| ATOM | 2663 | CA  | ALA | 343 | -66.293 | 33.916 | 23.154 | 1.00732.31 | C |
| ATOM | 2664 | CB  | ALA | 343 | -66.297 | 34.531 | 21.744 | 1.00732.31 | C |
| ATOM | 2665 | C   | ALA | 343 | -65.124 | 32.975 | 23.219 | 1.00732.31 | C |
| ATOM | 2666 | O   | ALA | 343 | -64.101 | 33.268 | 23.831 | 1.00732.31 | O |
| ATOM | 2667 | N   | MET | 344 | -65.268 | 31.783 | 22.601 | 1.00676.94 | N |
| ATOM | 2668 | CA  | MET | 344 | -64.174 | 30.862 | 22.521 | 1.00676.94 | C |
| ATOM | 2669 | CB  | MET | 344 | -64.575 | 29.467 | 22.017 | 1.00676.94 | C |
| ATOM | 2670 | CG  | MET | 344 | -65.176 | 28.571 | 23.101 | 1.00676.94 | C |
| ATOM | 2671 | SD  | MET | 344 | -63.936 | 27.962 | 24.284 | 1.00676.94 | S |
| ATOM | 2672 | CE  | MET | 344 | -65.080 | 26.942 | 25.255 | 1.00676.94 | C |
| ATOM | 2673 | C   | MET | 344 | -63.203 | 31.448 | 21.552 | 1.00676.94 | C |
| ATOM | 2674 | O   | MET | 344 | -63.586 | 32.156 | 20.622 | 1.00676.94 | O |
| ATOM | 2675 | N   | THR | 345 | -61.902 | 31.186 | 21.768 | 1.00310.44 | N |
| ATOM | 2676 | CA  | THR | 345 | -60.901 | 31.726 | 20.895 | 1.00310.44 | C |
| ATOM | 2677 | CB  | THR | 345 | -59.533 | 31.733 | 21.507 | 1.00310.44 | C |
| ATOM | 2678 | OG1 | THR | 345 | -59.180 | 30.421 | 21.917 | 1.00310.44 | O |
| ATOM | 2679 | CG2 | THR | 345 | -59.529 | 32.692 | 22.708 | 1.00310.44 | C |
| ATOM | 2680 | C   | THR | 345 | -60.851 | 30.942 | 19.610 | 1.00310.44 | C |
| ATOM | 2681 | O   | THR | 345 | -61.267 | 29.786 | 19.552 | 1.00310.44 | O |
| ATOM | 2682 | N   | ASP | 346 | -60.318 | 31.581 | 18.541 | 1.00542.61 | N |
| ATOM | 2683 | CA  | ASP | 346 | -60.247 | 31.052 | 17.197 | 1.00542.61 | C |
| ATOM | 2684 | CB  | ASP | 346 | -60.181 | 32.205 | 16.170 | 1.00542.61 | C |
| ATOM | 2685 | CG  | ASP | 346 | -60.364 | 31.713 | 14.740 | 1.00542.61 | C |
| ATOM | 2686 | OD1 | ASP | 346 | -60.272 | 30.480 | 14.503 | 1.00542.61 | O |
| ATOM | 2687 | OD2 | ASP | 346 | -60.598 | 32.583 | 13.857 | 1.00542.61 | O |
| ATOM | 2688 | C   | ASP | 346 | -58.999 | 30.217 | 17.053 | 1.00542.61 | C |
| ATOM | 2689 | O   | ASP | 346 | -57.887 | 30.739 | 17.036 | 1.00542.61 | O |
| ATOM | 2690 | N   | THR | 347 | -59.188 | 28.881 | 17.006 | 1.00163.63 | N |
| ATOM | 2691 | CA  | THR | 347 | -58.240 | 27.794 | 16.917 | 1.00163.63 | C |
| ATOM | 2692 | CB  | THR | 347 | -58.852 | 26.566 | 17.516 | 1.00163.63 | C |
| ATOM | 2693 | OG1 | THR | 347 | -59.305 | 26.869 | 18.825 | 1.00163.63 | O |
| ATOM | 2694 | CG2 | THR | 347 | -57.792 | 25.465 | 17.612 | 1.00163.63 | C |
| ATOM | 2695 | C   | THR | 347 | -57.781 | 27.499 | 15.516 | 1.00163.63 | C |
| ATOM | 2696 | O   | THR | 347 | -56.812 | 26.766 | 15.316 | 1.00163.63 | O |
| ATOM | 2697 | N   | THR | 348 | -58.513 | 27.969 | 14.493 | 1.00141.64 | N |
| ATOM | 2698 | CA  | THR | 348 | -58.151 | 27.627 | 13.146 | 1.00141.64 | C |
| ATOM | 2699 | CB  | THR | 348 | -59.169 | 28.105 | 12.152 | 1.00141.64 | C |
| ATOM | 2700 | OG1 | THR | 348 | -59.247 | 29.522 | 12.159 | 1.00141.64 | O |
| ATOM | 2701 | CG2 | THR | 348 | -60.528 | 27.494 | 12.541 | 1.00141.64 | C |
| ATOM | 2702 | C   | THR | 348 | -56.807 | 28.210 | 12.828 | 1.00141.64 | C |
| ATOM | 2703 | O   | THR | 348 | -56.293 | 29.072 | 13.539 | 1.00141.64 | O |
| ATOM | 2704 | N   | PRO | 349 | -56.189 | 27.721 | 11.785 | 1.00274.08 | N |
| ATOM | 2705 | CA  | PRO | 349 | -54.875 | 28.152 | 11.412 | 1.00274.08 | C |
| ATOM | 2706 | CD  | PRO | 349 | -56.786 | 26.807 | 10.825 | 1.00274.08 | C |
| ATOM | 2707 | CB  | PRO | 349 | -54.536 | 27.375 | 10.136 | 1.00274.08 | C |
| ATOM | 2708 | CG  | PRO | 349 | -55.904 | 26.942 | 9.574  | 1.00274.08 | C |
| ATOM | 2709 | C   | PRO | 349 | -54.742 | 29.654 | 11.278 | 1.00274.08 | C |
| ATOM | 2710 | O   | PRO | 349 | -53.717 | 30.151 | 11.745 | 1.00274.08 | O |

|      |      |     |     |     |         |        |        |            |   |
|------|------|-----|-----|-----|---------|--------|--------|------------|---|
| ATOM | 2711 | N   | TYR | 350 | -55.705 | 30.402 | 10.660 | 1.00999.99 | N |
| ATOM | 2712 | CA  | TYR | 350 | -55.539 | 31.849 | 10.563 | 1.00999.99 | C |
| ATOM | 2713 | CB  | TYR | 350 | -56.449 | 32.662 | 9.495  | 1.00999.99 | C |
| ATOM | 2714 | CG  | TYR | 350 | -56.112 | 34.152 | 9.076  | 1.00999.99 | C |
| ATOM | 2715 | CD1 | TYR | 350 | -55.645 | 35.055 | 10.003 | 1.00999.99 | C |
| ATOM | 2716 | CD2 | TYR | 350 | -56.220 | 34.728 | 7.770  | 1.00999.99 | C |
| ATOM | 2717 | CE1 | TYR | 350 | -55.350 | 36.373 | 9.663  | 1.00999.99 | C |
| ATOM | 2718 | CE2 | TYR | 350 | -55.932 | 36.058 | 7.408  | 1.00999.99 | C |
| ATOM | 2719 | CZ  | TYR | 350 | -55.483 | 36.902 | 8.395  | 1.00999.99 | C |
| ATOM | 2720 | OH  | TYR | 350 | -55.141 | 38.254 | 8.223  | 1.00999.99 | O |
| ATOM | 2721 | C   | TYR | 350 | -55.696 | 32.397 | 11.955 | 1.00999.99 | C |
| ATOM | 2722 | O   | TYR | 350 | -55.013 | 33.348 | 12.327 | 1.00999.99 | O |
| ATOM | 2723 | N   | GLY | 351 | -56.584 | 31.796 | 12.780 | 1.00681.52 | N |
| ATOM | 2724 | CA  | GLY | 351 | -56.849 | 32.297 | 14.107 | 1.00681.52 | C |
| ATOM | 2725 | C   | GLY | 351 | -55.604 | 32.339 | 14.925 | 1.00681.52 | C |
| ATOM | 2726 | O   | GLY | 351 | -55.282 | 33.366 | 15.519 | 1.00681.52 | O |
| ATOM | 2727 | N   | GLN | 352 | -54.866 | 31.220 | 14.983 | 1.00521.02 | N |
| ATOM | 2728 | CA  | GLN | 352 | -53.702 | 31.204 | 15.808 | 1.00521.02 | C |
| ATOM | 2729 | CB  | GLN | 352 | -53.195 | 29.800 | 16.162 | 1.00521.02 | C |
| ATOM | 2730 | CG  | GLN | 352 | -52.784 | 28.959 | 14.967 | 1.00521.02 | C |
| ATOM | 2731 | CD  | GLN | 352 | -51.633 | 28.115 | 15.468 | 1.00521.02 | C |
| ATOM | 2732 | OE1 | GLN | 352 | -51.695 | 27.515 | 16.540 | 1.00521.02 | O |
| ATOM | 2733 | NE2 | GLN | 352 | -50.520 | 28.133 | 14.689 | 1.00521.02 | N |
| ATOM | 2734 | C   | GLN | 352 | -52.594 | 32.016 | 15.193 | 1.00521.02 | C |
| ATOM | 2735 | O   | GLN | 352 | -51.803 | 32.628 | 15.908 | 1.00521.02 | O |
| ATOM | 2736 | N   | GLN | 353 | -52.514 | 32.045 | 13.847 | 1.00676.98 | N |
| ATOM | 2737 | CA  | GLN | 353 | -51.478 | 32.731 | 13.112 | 1.00676.98 | C |
| ATOM | 2738 | CB  | GLN | 353 | -51.772 | 32.785 | 11.602 | 1.00676.98 | C |
| ATOM | 2739 | CG  | GLN | 353 | -51.469 | 31.525 | 10.815 | 1.00676.98 | C |
| ATOM | 2740 | CD  | GLN | 353 | -49.960 | 31.514 | 10.672 | 1.00676.98 | C |
| ATOM | 2741 | OE1 | GLN | 353 | -49.301 | 30.569 | 11.094 | 1.00676.98 | O |
| ATOM | 2742 | NE2 | GLN | 353 | -49.390 | 32.597 | 10.079 | 1.00676.98 | N |
| ATOM | 2743 | C   | GLN | 353 | -51.499 | 34.196 | 13.439 | 1.00676.98 | C |
| ATOM | 2744 | O   | GLN | 353 | -50.461 | 34.843 | 13.576 | 1.00676.98 | O |
| ATOM | 2745 | N   | ARG | 354 | -52.709 | 34.766 | 13.524 | 1.00999.99 | N |
| ATOM | 2746 | CA  | ARG | 354 | -52.895 | 36.168 | 13.738 | 1.00999.99 | C |
| ATOM | 2747 | CB  | ARG | 354 | -54.390 | 36.532 | 13.747 | 1.00999.99 | C |
| ATOM | 2748 | CG  | ARG | 354 | -54.703 | 37.868 | 14.414 | 1.00999.99 | C |
| ATOM | 2749 | CD  | ARG | 354 | -56.107 | 38.398 | 14.107 | 1.00999.99 | C |
| ATOM | 2750 | NE  | ARG | 354 | -57.026 | 37.234 | 13.945 | 1.00999.99 | N |
| ATOM | 2751 | CZ  | ARG | 354 | -58.057 | 37.045 | 14.817 | 1.00999.99 | C |
| ATOM | 2752 | NH1 | ARG | 354 | -58.205 | 37.871 | 15.894 | 1.00999.99 | N |
| ATOM | 2753 | NH2 | ARG | 354 | -58.948 | 36.033 | 14.607 | 1.00999.99 | N |
| ATOM | 2754 | C   | ARG | 354 | -52.315 | 36.575 | 15.050 | 1.00999.99 | C |
| ATOM | 2755 | O   | ARG | 354 | -51.796 | 37.684 | 15.184 | 1.00999.99 | O |
| ATOM | 2756 | N   | VAL | 355 | -52.483 | 35.716 | 16.069 | 1.00584.29 | N |
| ATOM | 2757 | CA  | VAL | 355 | -51.933 | 35.927 | 17.376 | 1.00584.29 | C |
| ATOM | 2758 | CB  | VAL | 355 | -52.488 | 34.959 | 18.385 | 1.00584.29 | C |
| ATOM | 2759 | CG1 | VAL | 355 | -51.764 | 35.165 | 19.725 | 1.00584.29 | C |
| ATOM | 2760 | CG2 | VAL | 355 | -54.014 | 35.144 | 18.462 | 1.00584.29 | C |
| ATOM | 2761 | C   | VAL | 355 | -50.450 | 35.721 | 17.356 | 1.00584.29 | C |
| ATOM | 2762 | O   | VAL | 355 | -49.698 | 36.459 | 17.993 | 1.00584.29 | O |
| ATOM | 2763 | N   | PHE | 356 | -49.999 | 34.717 | 16.583 | 1.00519.60 | N |
| ATOM | 2764 | CA  | PHE | 356 | -48.631 | 34.269 | 16.558 | 1.00519.60 | C |
| ATOM | 2765 | CB  | PHE | 356 | -48.428 | 33.131 | 15.527 | 1.00519.60 | C |
| ATOM | 2766 | CG  | PHE | 356 | -47.057 | 32.544 | 15.646 | 1.00519.60 | C |
| ATOM | 2767 | CD1 | PHE | 356 | -46.773 | 31.565 | 16.570 | 1.00519.60 | C |
| ATOM | 2768 | CD2 | PHE | 356 | -46.045 | 32.957 | 14.815 | 1.00519.60 | C |
| ATOM | 2769 | CE1 | PHE | 356 | -45.509 | 31.026 | 16.668 | 1.00519.60 | C |
| ATOM | 2770 | CE2 | PHE | 356 | -44.781 | 32.422 | 14.911 | 1.00519.60 | C |
| ATOM | 2771 | CZ  | PHE | 356 | -44.504 | 31.453 | 15.840 | 1.00519.60 | C |
| ATOM | 2772 | C   | PHE | 356 | -47.767 | 35.427 | 16.185 | 1.00519.60 | C |
| ATOM | 2773 | O   | PHE | 356 | -46.717 | 35.641 | 16.790 | 1.00519.60 | O |
| ATOM | 2774 | N   | LYS | 357 | -48.194 | 36.220 | 15.188 | 1.00479.62 | N |
| ATOM | 2775 | CA  | LYS | 357 | -47.380 | 37.298 | 14.717 | 1.00479.62 | C |
| ATOM | 2776 | CB  | LYS | 357 | -47.878 | 37.956 | 13.418 | 1.00479.62 | C |

|      |      |     |     |     |         |        |        |            |   |
|------|------|-----|-----|-----|---------|--------|--------|------------|---|
| ATOM | 2777 | CG  | LYS | 357 | -49.216 | 38.685 | 13.512 | 1.00479.62 | C |
| ATOM | 2778 | CD  | LYS | 357 | -49.452 | 39.585 | 12.301 | 1.00479.62 | C |
| ATOM | 2779 | CE  | LYS | 357 | -50.895 | 40.060 | 12.132 | 1.00479.62 | C |
| ATOM | 2780 | NZ  | LYS | 357 | -51.185 | 41.169 | 13.065 | 1.00479.62 | N |
| ATOM | 2781 | C   | LYS | 357 | -47.177 | 38.369 | 15.746 | 1.00479.62 | C |
| ATOM | 2782 | O   | LYS | 357 | -46.170 | 39.070 | 15.673 | 1.00479.62 | O |
| ATOM | 2783 | N   | GLU | 358 | -48.161 | 38.659 | 16.624 | 1.00999.99 | N |
| ATOM | 2784 | CA  | GLU | 358 | -47.877 | 39.671 | 17.606 | 1.00999.99 | C |
| ATOM | 2785 | CB  | GLU | 358 | -49.136 | 40.407 | 18.095 | 1.00999.99 | C |
| ATOM | 2786 | CG  | GLU | 358 | -49.746 | 41.303 | 17.014 | 1.00999.99 | C |
| ATOM | 2787 | CD  | GLU | 358 | -48.669 | 42.271 | 16.537 | 1.00999.99 | C |
| ATOM | 2788 | OE1 | GLU | 358 | -47.904 | 42.783 | 17.397 | 1.00999.99 | O |
| ATOM | 2789 | OE2 | GLU | 358 | -48.591 | 42.502 | 15.300 | 1.00999.99 | O |
| ATOM | 2790 | C   | GLU | 358 | -47.124 | 39.187 | 18.818 | 1.00999.99 | C |
| ATOM | 2791 | O   | GLU | 358 | -46.145 | 39.803 | 19.235 | 1.00999.99 | O |
| ATOM | 2792 | N   | LYS | 359 | -47.624 | 38.116 | 19.471 | 1.00900.91 | N |
| ATOM | 2793 | CA  | LYS | 359 | -47.025 | 37.643 | 20.693 | 1.00900.91 | C |
| ATOM | 2794 | CB  | LYS | 359 | -48.020 | 36.876 | 21.582 | 1.00900.91 | C |
| ATOM | 2795 | CG  | LYS | 359 | -48.818 | 37.803 | 22.501 | 1.00900.91 | C |
| ATOM | 2796 | CD  | LYS | 359 | -47.889 | 38.575 | 23.442 | 1.00900.91 | C |
| ATOM | 2797 | CE  | LYS | 359 | -48.579 | 39.346 | 24.563 | 1.00900.91 | C |
| ATOM | 2798 | NZ  | LYS | 359 | -47.551 | 39.893 | 25.478 | 1.00900.91 | N |
| ATOM | 2799 | C   | LYS | 359 | -45.787 | 36.798 | 20.560 | 1.00900.91 | C |
| ATOM | 2800 | O   | LYS | 359 | -44.754 | 37.092 | 21.161 | 1.00900.91 | O |
| ATOM | 2801 | N   | VAL | 360 | -45.884 | 35.699 | 19.789 | 1.00465.18 | N |
| ATOM | 2802 | CA  | VAL | 360 | -44.852 | 34.697 | 19.703 | 1.00465.18 | C |
| ATOM | 2803 | CB  | VAL | 360 | -45.387 | 33.392 | 19.194 | 1.00465.18 | C |
| ATOM | 2804 | CG1 | VAL | 360 | -44.244 | 32.366 | 19.126 | 1.00465.18 | C |
| ATOM | 2805 | CG2 | VAL | 360 | -46.541 | 32.964 | 20.120 | 1.00465.18 | C |
| ATOM | 2806 | C   | VAL | 360 | -43.681 | 35.114 | 18.870 | 1.00465.18 | C |
| ATOM | 2807 | O   | VAL | 360 | -42.539 | 34.790 | 19.191 | 1.00465.18 | O |
| ATOM | 2808 | N   | ASP | 361 | -43.931 | 35.838 | 17.764 | 1.00420.84 | N |
| ATOM | 2809 | CA  | ASP | 361 | -42.883 | 36.166 | 16.845 | 1.00420.84 | C |
| ATOM | 2810 | CB  | ASP | 361 | -43.437 | 36.370 | 15.424 | 1.00420.84 | C |
| ATOM | 2811 | CG  | ASP | 361 | -42.297 | 36.365 | 14.423 | 1.00420.84 | C |
| ATOM | 2812 | OD1 | ASP | 361 | -41.118 | 36.363 | 14.859 | 1.00420.84 | O |
| ATOM | 2813 | OD2 | ASP | 361 | -42.595 | 36.364 | 13.200 | 1.00420.84 | O |
| ATOM | 2814 | C   | ASP | 361 | -42.231 | 37.448 | 17.289 | 1.00420.84 | C |
| ATOM | 2815 | O   | ASP | 361 | -42.278 | 38.455 | 16.586 | 1.00420.84 | O |
| ATOM | 2816 | N   | THR | 362 | -41.576 | 37.441 | 18.467 | 1.00409.43 | N |
| ATOM | 2817 | CA  | THR | 362 | -40.916 | 38.625 | 18.947 | 1.00409.43 | C |
| ATOM | 2818 | CB  | THR | 362 | -41.663 | 39.335 | 20.040 | 1.00409.43 | C |
| ATOM | 2819 | OG1 | THR | 362 | -41.830 | 38.480 | 21.162 | 1.00409.43 | O |
| ATOM | 2820 | CG2 | THR | 362 | -43.034 | 39.773 | 19.496 | 1.00409.43 | C |
| ATOM | 2821 | C   | THR | 362 | -39.579 | 38.214 | 19.474 | 1.00409.43 | C |
| ATOM | 2822 | O   | THR | 362 | -39.351 | 37.038 | 19.752 | 1.00409.43 | O |
| ATOM | 2823 | N   | ARG | 363 | -38.635 | 39.168 | 19.589 | 1.00270.51 | N |
| ATOM | 2824 | CA  | ARG | 363 | -37.349 | 38.815 | 20.114 | 1.00270.51 | C |
| ATOM | 2825 | CB  | ARG | 363 | -36.221 | 39.052 | 19.099 | 1.00270.51 | C |
| ATOM | 2826 | CG  | ARG | 363 | -34.884 | 38.435 | 19.501 | 1.00270.51 | C |
| ATOM | 2827 | CD  | ARG | 363 | -33.711 | 38.940 | 18.661 | 1.00270.51 | C |
| ATOM | 2828 | NE  | ARG | 363 | -33.891 | 38.453 | 17.265 | 1.00270.51 | N |
| ATOM | 2829 | CZ  | ARG | 363 | -33.340 | 37.262 | 16.889 | 1.00270.51 | C |
| ATOM | 2830 | NH1 | ARG | 363 | -32.701 | 36.488 | 17.815 | 1.00270.51 | N |
| ATOM | 2831 | NH2 | ARG | 363 | -33.415 | 36.851 | 15.590 | 1.00270.51 | N |
| ATOM | 2832 | C   | ARG | 363 | -37.083 | 39.683 | 21.296 | 1.00270.51 | C |
| ATOM | 2833 | O   | ARG | 363 | -37.275 | 40.896 | 21.244 | 1.00270.51 | O |
| ATOM | 2834 | N   | VAL | 364 | -36.629 | 39.070 | 22.405 | 1.00322.30 | N |
| ATOM | 2835 | CA  | VAL | 364 | -36.331 | 39.834 | 23.585 | 1.00322.30 | C |
| ATOM | 2836 | CB  | VAL | 364 | -36.609 | 39.118 | 24.874 | 1.00322.30 | C |
| ATOM | 2837 | CG1 | VAL | 364 | -36.069 | 39.977 | 26.031 | 1.00322.30 | C |
| ATOM | 2838 | CG2 | VAL | 364 | -38.121 | 38.852 | 24.965 | 1.00322.30 | C |
| ATOM | 2839 | C   | VAL | 364 | -34.875 | 40.150 | 23.528 | 1.00322.30 | C |
| ATOM | 2840 | O   | VAL | 364 | -34.045 | 39.303 | 23.203 | 1.00322.30 | O |
| ATOM | 2841 | N   | PRO | 365 | -34.548 | 41.371 | 23.829 | 1.00228.18 | N |
| ATOM | 2842 | CA  | PRO | 365 | -33.183 | 41.803 | 23.790 | 1.00228.18 | C |

|      |      |     |     |     |         |        |        |            |   |
|------|------|-----|-----|-----|---------|--------|--------|------------|---|
| ATOM | 2843 | CD  | PRO | 365 | -35.477 | 42.478 | 23.703 | 1.00228.18 | C |
| ATOM | 2844 | CB  | PRO | 365 | -33.218 | 43.335 | 23.853 | 1.00228.18 | C |
| ATOM | 2845 | CG  | PRO | 365 | -34.673 | 43.680 | 24.223 | 1.00228.18 | C |
| ATOM | 2846 | C   | PRO | 365 | -32.359 | 41.156 | 24.849 | 1.00228.18 | C |
| ATOM | 2847 | O   | PRO | 365 | -32.875 | 40.825 | 25.915 | 1.00228.18 | O |
| ATOM | 2848 | N   | ASP | 366 | -31.065 | 40.962 | 24.547 | 1.00165.54 | N |
| ATOM | 2849 | CA  | ASP | 366 | -30.142 | 40.328 | 25.438 | 1.00165.54 | C |
| ATOM | 2850 | CB  | ASP | 366 | -28.782 | 40.111 | 24.748 | 1.00165.54 | C |
| ATOM | 2851 | CG  | ASP | 366 | -27.898 | 39.187 | 25.565 | 1.00165.54 | C |
| ATOM | 2852 | OD1 | ASP | 366 | -27.945 | 39.254 | 26.822 | 1.00165.54 | O |
| ATOM | 2853 | OD2 | ASP | 366 | -27.153 | 38.390 | 24.935 | 1.00165.54 | O |
| ATOM | 2854 | C   | ASP | 366 | -29.943 | 41.237 | 26.614 | 1.00165.54 | C |
| ATOM | 2855 | O   | ASP | 366 | -29.868 | 42.456 | 26.465 | 1.00165.54 | O |
| ATOM | 2856 | N   | PRO | 367 | -29.866 | 40.671 | 27.791 | 1.00116.98 | N |
| ATOM | 2857 | CA  | PRO | 367 | -29.643 | 41.435 | 28.988 | 1.00116.98 | C |
| ATOM | 2858 | CD  | PRO | 367 | -30.479 | 39.385 | 28.067 | 1.00116.98 | C |
| ATOM | 2859 | CB  | PRO | 367 | -30.013 | 40.513 | 30.153 | 1.00116.98 | C |
| ATOM | 2860 | CG  | PRO | 367 | -30.108 | 39.109 | 29.531 | 1.00116.98 | C |
| ATOM | 2861 | C   | PRO | 367 | -28.230 | 41.930 | 29.027 | 1.00116.98 | C |
| ATOM | 2862 | O   | PRO | 367 | -27.361 | 41.310 | 28.414 | 1.00116.98 | O |
| ATOM | 2863 | N   | GLN | 368 | -27.981 | 43.043 | 29.744 | 1.00111.02 | N |
| ATOM | 2864 | CA  | GLN | 368 | -26.672 | 43.626 | 29.819 | 1.00111.02 | C |
| ATOM | 2865 | CB  | GLN | 368 | -26.663 | 45.032 | 30.444 | 1.00111.02 | C |
| ATOM | 2866 | CG  | GLN | 368 | -27.404 | 46.067 | 29.594 | 1.00111.02 | C |
| ATOM | 2867 | CD  | GLN | 368 | -27.307 | 47.420 | 30.283 | 1.00111.02 | C |
| ATOM | 2868 | OE1 | GLN | 368 | -26.855 | 47.522 | 31.423 | 1.00111.02 | O |
| ATOM | 2869 | NE2 | GLN | 368 | -27.740 | 48.493 | 29.568 | 1.00111.02 | N |
| ATOM | 2870 | C   | GLN | 368 | -25.790 | 42.739 | 30.639 | 1.00111.02 | C |
| ATOM | 2871 | O   | GLN | 368 | -26.256 | 41.911 | 31.418 | 1.00111.02 | O |
| ATOM | 2872 | N   | GLU | 369 | -24.466 | 42.909 | 30.485 | 1.00210.73 | N |
| ATOM | 2873 | CA  | GLU | 369 | -23.517 | 42.048 | 31.130 | 1.00210.73 | C |
| ATOM | 2874 | CB  | GLU | 369 | -22.065 | 42.410 | 30.805 | 1.00210.73 | C |
| ATOM | 2875 | CG  | GLU | 369 | -21.069 | 41.585 | 31.614 | 1.00210.73 | C |
| ATOM | 2876 | CD  | GLU | 369 | -19.778 | 41.571 | 30.826 | 1.00210.73 | C |
| ATOM | 2877 | OE1 | GLU | 369 | -19.813 | 41.002 | 29.702 | 1.00210.73 | O |
| ATOM | 2878 | OE2 | GLU | 369 | -18.754 | 42.118 | 31.315 | 1.00210.73 | O |
| ATOM | 2879 | C   | GLU | 369 | -23.660 | 42.084 | 32.617 | 1.00210.73 | C |
| ATOM | 2880 | O   | GLU | 369 | -23.549 | 41.049 | 33.271 | 1.00210.73 | O |
| ATOM | 2881 | N   | GLY | 370 | -23.894 | 43.268 | 33.204 | 1.00102.08 | N |
| ATOM | 2882 | CA  | GLY | 370 | -23.986 | 43.345 | 34.635 | 1.00102.08 | C |
| ATOM | 2883 | C   | GLY | 370 | -25.163 | 42.549 | 35.103 | 1.00102.08 | C |
| ATOM | 2884 | O   | GLY | 370 | -25.094 | 41.873 | 36.129 | 1.00102.08 | O |
| ATOM | 2885 | N   | THR | 371 | -26.289 | 42.635 | 34.366 | 1.00170.99 | N |
| ATOM | 2886 | CA  | THR | 371 | -27.485 | 41.952 | 34.767 | 1.00170.99 | C |
| ATOM | 2887 | CB  | THR | 371 | -28.694 | 42.379 | 33.988 | 1.00170.99 | C |
| ATOM | 2888 | OG1 | THR | 371 | -29.869 | 42.048 | 34.707 | 1.00170.99 | O |
| ATOM | 2889 | CG2 | THR | 371 | -28.706 | 41.665 | 32.632 | 1.00170.99 | C |
| ATOM | 2890 | C   | THR | 371 | -27.282 | 40.472 | 34.630 | 1.00170.99 | C |
| ATOM | 2891 | O   | THR | 371 | -27.769 | 39.688 | 35.440 | 1.00170.99 | O |
| ATOM | 2892 | N   | ARG | 372 | -26.537 | 40.057 | 33.592 | 1.00192.34 | N |
| ATOM | 2893 | CA  | ARG | 372 | -26.277 | 38.674 | 33.319 | 1.00192.34 | C |
| ATOM | 2894 | CB  | ARG | 372 | -25.403 | 38.533 | 32.062 | 1.00192.34 | C |
| ATOM | 2895 | CG  | ARG | 372 | -25.334 | 37.123 | 31.486 | 1.00192.34 | C |
| ATOM | 2896 | CD  | ARG | 372 | -24.558 | 37.059 | 30.170 | 1.00192.34 | C |
| ATOM | 2897 | NE  | ARG | 372 | -23.104 | 37.052 | 30.494 | 1.00192.34 | N |
| ATOM | 2898 | CZ  | ARG | 372 | -22.186 | 37.256 | 29.505 | 1.00192.34 | C |
| ATOM | 2899 | NH1 | ARG | 372 | -22.600 | 37.492 | 28.226 | 1.00192.34 | N |
| ATOM | 2900 | NH2 | ARG | 372 | -20.852 | 37.227 | 29.795 | 1.00192.34 | N |
| ATOM | 2901 | C   | ARG | 372 | -25.540 | 38.084 | 34.484 | 1.00192.34 | C |
| ATOM | 2902 | O   | ARG | 372 | -25.805 | 36.955 | 34.894 | 1.00192.34 | O |
| ATOM | 2903 | N   | GLN | 373 | -24.585 | 38.845 | 35.048 | 1.00147.01 | N |
| ATOM | 2904 | CA  | GLN | 373 | -23.751 | 38.392 | 36.133 | 1.00147.01 | C |
| ATOM | 2905 | CB  | GLN | 373 | -22.645 | 39.417 | 36.463 | 1.00147.01 | C |
| ATOM | 2906 | CG  | GLN | 373 | -21.523 | 38.888 | 37.355 | 1.00147.01 | C |
| ATOM | 2907 | CD  | GLN | 373 | -20.399 | 39.917 | 37.322 | 1.00147.01 | C |
| ATOM | 2908 | OE1 | GLN | 373 | -20.112 | 40.505 | 36.279 | 1.00147.01 | O |

|      |      |     |     |     |         |        |        |            |   |
|------|------|-----|-----|-----|---------|--------|--------|------------|---|
| ATOM | 2909 | NE2 | GLN | 373 | -19.748 | 40.149 | 38.492 | 1.00147.01 | N |
| ATOM | 2910 | C   | GLN | 373 | -24.567 | 38.160 | 37.377 | 1.00147.01 | C |
| ATOM | 2911 | O   | GLN | 373 | -24.362 | 37.176 | 38.087 | 1.00147.01 | O |
| ATOM | 2912 | N   | VAL | 374 | -25.512 | 39.071 | 37.682 | 1.00 87.75 | N |
| ATOM | 2913 | CA  | VAL | 374 | -26.289 | 38.960 | 38.886 | 1.00 87.75 | C |
| ATOM | 2914 | CB  | VAL | 374 | -27.133 | 40.170 | 39.157 | 1.00 87.75 | C |
| ATOM | 2915 | CG1 | VAL | 374 | -27.915 | 39.937 | 40.461 | 1.00 87.75 | C |
| ATOM | 2916 | CG2 | VAL | 374 | -26.211 | 41.402 | 39.202 | 1.00 87.75 | C |
| ATOM | 2917 | C   | VAL | 374 | -27.188 | 37.769 | 38.798 | 1.00 87.75 | C |
| ATOM | 2918 | O   | VAL | 374 | -27.378 | 37.067 | 39.792 | 1.00 87.75 | O |
| ATOM | 2919 | N   | MET | 375 | -27.766 | 37.527 | 37.601 | 1.00 70.34 | N |
| ATOM | 2920 | CA  | MET | 375 | -28.673 | 36.432 | 37.385 | 1.00 70.34 | C |
| ATOM | 2921 | CB  | MET | 375 | -29.249 | 36.385 | 35.959 | 1.00 70.34 | C |
| ATOM | 2922 | CG  | MET | 375 | -30.151 | 37.568 | 35.608 | 1.00 70.34 | C |
| ATOM | 2923 | SD  | MET | 375 | -30.851 | 37.497 | 33.931 | 1.00 70.34 | S |
| ATOM | 2924 | CE  | MET | 375 | -29.258 | 37.690 | 33.083 | 1.00 70.34 | C |
| ATOM | 2925 | C   | MET | 375 | -27.938 | 35.148 | 37.592 | 1.00 70.34 | C |
| ATOM | 2926 | O   | MET | 375 | -28.488 | 34.192 | 38.134 | 1.00 70.34 | O |
| ATOM | 2927 | N   | ASN | 376 | -26.674 | 35.093 | 37.138 | 1.00 57.11 | N |
| ATOM | 2928 | CA  | ASN | 376 | -25.875 | 33.907 | 37.247 | 1.00 57.11 | C |
| ATOM | 2929 | CB  | ASN | 376 | -24.495 | 34.080 | 36.585 | 1.00 57.11 | C |
| ATOM | 2930 | CG  | ASN | 376 | -23.811 | 32.723 | 36.502 | 1.00 57.11 | C |
| ATOM | 2931 | OD1 | ASN | 376 | -23.618 | 32.042 | 37.508 | 1.00 57.11 | O |
| ATOM | 2932 | ND2 | ASN | 376 | -23.436 | 32.313 | 35.261 | 1.00 57.11 | N |
| ATOM | 2933 | C   | ASN | 376 | -25.649 | 33.589 | 38.691 | 1.00 57.11 | C |
| ATOM | 2934 | O   | ASN | 376 | -25.765 | 32.438 | 39.108 | 1.00 57.11 | O |
| ATOM | 2935 | N   | ILE | 377 | -25.317 | 34.613 | 39.497 | 1.00118.21 | N |
| ATOM | 2936 | CA  | ILE | 377 | -25.005 | 34.402 | 40.882 | 1.00118.21 | C |
| ATOM | 2937 | CB  | ILE | 377 | -24.415 | 35.625 | 41.533 | 1.00118.21 | C |
| ATOM | 2938 | CG1 | ILE | 377 | -23.657 | 35.232 | 42.807 | 1.00118.21 | C |
| ATOM | 2939 | CG2 | ILE | 377 | -25.520 | 36.665 | 41.771 | 1.00118.21 | C |
| ATOM | 2940 | CD1 | ILE | 377 | -22.715 | 36.330 | 43.296 | 1.00118.21 | C |
| ATOM | 2941 | C   | ILE | 377 | -26.228 | 33.950 | 41.629 | 1.00118.21 | C |
| ATOM | 2942 | O   | ILE | 377 | -26.151 | 33.040 | 42.452 | 1.00118.21 | O |
| ATOM | 2943 | N   | VAL | 378 | -27.391 | 34.584 | 41.371 | 1.00108.74 | N |
| ATOM | 2944 | CA  | VAL | 378 | -28.600 | 34.236 | 42.064 | 1.00108.74 | C |
| ATOM | 2945 | CB  | VAL | 378 | -29.730 | 35.193 | 41.819 | 1.00108.74 | C |
| ATOM | 2946 | CG1 | VAL | 378 | -29.372 | 36.537 | 42.475 | 1.00108.74 | C |
| ATOM | 2947 | CG2 | VAL | 378 | -29.972 | 35.294 | 40.305 | 1.00108.74 | C |
| ATOM | 2948 | C   | VAL | 378 | -29.040 | 32.853 | 41.689 | 1.00108.74 | C |
| ATOM | 2949 | O   | VAL | 378 | -29.510 | 32.097 | 42.537 | 1.00108.74 | O |
| ATOM | 2950 | N   | SER | 379 | -28.903 | 32.488 | 40.403 | 1.00 85.01 | N |
| ATOM | 2951 | CA  | SER | 379 | -29.315 | 31.199 | 39.920 | 1.00 85.01 | C |
| ATOM | 2952 | CB  | SER | 379 | -29.061 | 31.071 | 38.411 | 1.00 85.01 | C |
| ATOM | 2953 | OG  | SER | 379 | -29.348 | 29.754 | 37.977 | 1.00 85.01 | O |
| ATOM | 2954 | C   | SER | 379 | -28.528 | 30.124 | 40.610 | 1.00 85.01 | C |
| ATOM | 2955 | O   | SER | 379 | -29.080 | 29.101 | 41.015 | 1.00 85.01 | O |
| ATOM | 2956 | N   | SER | 380 | -27.208 | 30.326 | 40.764 | 1.00 72.75 | N |
| ATOM | 2957 | CA  | SER | 380 | -26.378 | 29.330 | 41.379 | 1.00 72.75 | C |
| ATOM | 2958 | CB  | SER | 380 | -24.894 | 29.731 | 41.407 | 1.00 72.75 | C |
| ATOM | 2959 | OG  | SER | 380 | -24.398 | 29.868 | 40.084 | 1.00 72.75 | O |
| ATOM | 2960 | C   | SER | 380 | -26.817 | 29.149 | 42.797 | 1.00 72.75 | C |
| ATOM | 2961 | O   | SER | 380 | -26.909 | 28.026 | 43.292 | 1.00 72.75 | O |
| ATOM | 2962 | N   | TRP | 381 | -27.103 | 30.262 | 43.493 | 1.00 66.67 | N |
| ATOM | 2963 | CA  | TRP | 381 | -27.498 | 30.204 | 44.871 | 1.00 66.67 | C |
| ATOM | 2964 | CB  | TRP | 381 | -27.649 | 31.588 | 45.521 | 1.00 66.67 | C |
| ATOM | 2965 | CG  | TRP | 381 | -28.131 | 31.511 | 46.950 | 1.00 66.67 | C |
| ATOM | 2966 | CD2 | TRP | 381 | -29.503 | 31.668 | 47.342 | 1.00 66.67 | C |
| ATOM | 2967 | CD1 | TRP | 381 | -27.425 | 31.283 | 48.095 | 1.00 66.67 | C |
| ATOM | 2968 | NE1 | TRP | 381 | -28.274 | 31.282 | 49.176 | 1.00 66.67 | N |
| ATOM | 2969 | CE2 | TRP | 381 | -29.556 | 31.520 | 48.726 | 1.00 66.67 | C |
| ATOM | 2970 | CE3 | TRP | 381 | -30.627 | 31.915 | 46.605 | 1.00 66.67 | C |
| ATOM | 2971 | CZ2 | TRP | 381 | -30.739 | 31.615 | 49.401 | 1.00 66.67 | C |
| ATOM | 2972 | CZ3 | TRP | 381 | -31.818 | 32.013 | 47.289 | 1.00 66.67 | C |
| ATOM | 2973 | CH2 | TRP | 381 | -31.873 | 31.865 | 48.659 | 1.00 66.67 | C |
| ATOM | 2974 | C   | TRP | 381 | -28.820 | 29.510 | 44.998 | 1.00 66.67 | C |

|      |      |     |     |     |         |        |        |      |        |   |
|------|------|-----|-----|-----|---------|--------|--------|------|--------|---|
| ATOM | 2975 | O   | TRP | 381 | -29.019 | 28.714 | 45.913 | 1.00 | 66.67  | O |
| ATOM | 2976 | N   | LEU | 382 | -29.769 | 29.811 | 44.090 | 1.00 | 67.71  | N |
| ATOM | 2977 | CA  | LEU | 382 | -31.096 | 29.272 | 44.192 | 1.00 | 67.71  | C |
| ATOM | 2978 | CB  | LEU | 382 | -32.072 | 29.911 | 43.189 | 1.00 | 67.71  | C |
| ATOM | 2979 | CG  | LEU | 382 | -33.541 | 29.525 | 43.439 | 1.00 | 67.71  | C |
| ATOM | 2980 | CD1 | LEU | 382 | -33.991 | 29.952 | 44.845 | 1.00 | 67.71  | C |
| ATOM | 2981 | CD2 | LEU | 382 | -34.458 | 30.093 | 42.345 | 1.00 | 67.71  | C |
| ATOM | 2982 | C   | LEU | 382 | -31.081 | 27.783 | 43.998 | 1.00 | 67.71  | C |
| ATOM | 2983 | O   | LEU | 382 | -31.759 | 27.062 | 44.728 | 1.00 | 67.71  | O |
| ATOM | 2984 | N   | TRP | 383 | -30.302 | 27.274 | 43.022 | 1.00 | 75.85  | N |
| ATOM | 2985 | CA  | TRP | 383 | -30.274 | 25.856 | 42.792 | 1.00 | 75.85  | C |
| ATOM | 2986 | CB  | TRP | 383 | -29.431 | 25.412 | 41.583 | 1.00 | 75.85  | C |
| ATOM | 2987 | CG  | TRP | 383 | -30.090 | 25.696 | 40.256 | 1.00 | 75.85  | C |
| ATOM | 2988 | CD2 | TRP | 383 | -31.271 | 25.017 | 39.806 | 1.00 | 75.85  | C |
| ATOM | 2989 | CD1 | TRP | 383 | -29.766 | 26.599 | 39.286 | 1.00 | 75.85  | C |
| ATOM | 2990 | NE1 | TRP | 383 | -30.669 | 26.517 | 38.253 | 1.00 | 75.85  | N |
| ATOM | 2991 | CE2 | TRP | 383 | -31.602 | 25.549 | 38.561 | 1.00 | 75.85  | C |
| ATOM | 2992 | CE3 | TRP | 383 | -32.019 | 24.034 | 40.386 | 1.00 | 75.85  | C |
| ATOM | 2993 | CZ2 | TRP | 383 | -32.694 | 25.104 | 37.873 | 1.00 | 75.85  | C |
| ATOM | 2994 | CZ3 | TRP | 383 | -33.118 | 23.583 | 39.689 | 1.00 | 75.85  | C |
| ATOM | 2995 | CH2 | TRP | 383 | -33.448 | 24.109 | 38.457 | 1.00 | 75.85  | C |
| ATOM | 2996 | C   | TRP | 383 | -29.725 | 25.175 | 43.999 | 1.00 | 75.85  | C |
| ATOM | 2997 | O   | TRP | 383 | -30.210 | 24.118 | 44.398 | 1.00 | 75.85  | O |
| ATOM | 2998 | N   | LYS | 384 | -28.688 | 25.763 | 44.616 | 1.00 | 39.95  | N |
| ATOM | 2999 | CA  | LYS | 384 | -28.083 | 25.166 | 45.767 | 0.88 | 39.95  | C |
| ATOM | 3000 | CB  | LYS | 384 | -26.909 | 25.996 | 46.306 | 0.88 | 39.95  | C |
| ATOM | 3001 | CG  | LYS | 384 | -25.728 | 26.077 | 45.338 | 0.75 | 39.95  | C |
| ATOM | 3002 | CD  | LYS | 384 | -24.732 | 27.180 | 45.699 | 0.75 | 39.95  | C |
| ATOM | 3003 | CE  | LYS | 384 | -23.523 | 27.249 | 44.766 | 1.00 | 39.95  | C |
| ATOM | 3004 | NZ  | LYS | 384 | -22.633 | 28.358 | 45.178 | 1.00 | 39.95  | N |
| ATOM | 3005 | C   | LYS | 384 | -29.103 | 25.076 | 46.863 | 1.00 | 39.95  | C |
| ATOM | 3006 | O   | LYS | 384 | -29.155 | 24.081 | 47.584 | 1.00 | 39.95  | O |
| ATOM | 3007 | N   | GLU | 385 | -29.936 | 26.122 | 47.031 | 1.00 | 106.51 | N |
| ATOM | 3008 | CA  | GLU | 385 | -30.908 | 26.150 | 48.091 | 1.00 | 106.51 | C |
| ATOM | 3009 | CB  | GLU | 385 | -31.615 | 27.509 | 48.223 | 1.00 | 106.51 | C |
| ATOM | 3010 | CG  | GLU | 385 | -30.676 | 28.654 | 48.617 | 1.00 | 106.51 | C |
| ATOM | 3011 | CD  | GLU | 385 | -30.110 | 28.377 | 50.004 | 1.00 | 106.51 | C |
| ATOM | 3012 | OE1 | GLU | 385 | -30.351 | 27.261 | 50.538 | 1.00 | 106.51 | O |
| ATOM | 3013 | OE2 | GLU | 385 | -29.423 | 29.282 | 50.549 | 1.00 | 106.51 | O |
| ATOM | 3014 | C   | GLU | 385 | -31.968 | 25.108 | 47.875 | 1.00 | 106.51 | C |
| ATOM | 3015 | O   | GLU | 385 | -32.402 | 24.454 | 48.821 | 1.00 | 106.51 | O |
| ATOM | 3016 | N   | LEU | 386 | -32.431 | 24.937 | 46.621 | 1.00 | 65.57  | N |
| ATOM | 3017 | CA  | LEU | 386 | -33.481 | 23.998 | 46.324 | 1.00 | 65.57  | C |
| ATOM | 3018 | CB  | LEU | 386 | -33.941 | 24.058 | 44.856 | 1.00 | 65.57  | C |
| ATOM | 3019 | CG  | LEU | 386 | -34.572 | 25.401 | 44.446 | 1.00 | 65.57  | C |
| ATOM | 3020 | CD1 | LEU | 386 | -35.040 | 25.369 | 42.983 | 1.00 | 65.57  | C |
| ATOM | 3021 | CD2 | LEU | 386 | -35.686 | 25.824 | 45.418 | 1.00 | 65.57  | C |
| ATOM | 3022 | C   | LEU | 386 | -32.985 | 22.603 | 46.570 | 1.00 | 65.57  | C |
| ATOM | 3023 | O   | LEU | 386 | -33.725 | 21.726 | 47.012 | 1.00 | 65.57  | O |
| ATOM | 3024 | N   | GLY | 387 | -31.708 | 22.384 | 46.222 | 1.00 | 77.74  | N |
| ATOM | 3025 | CA  | GLY | 387 | -30.936 | 21.174 | 46.273 | 1.00 | 77.74  | C |
| ATOM | 3026 | C   | GLY | 387 | -30.563 | 20.722 | 47.652 | 1.00 | 77.74  | C |
| ATOM | 3027 | O   | GLY | 387 | -30.097 | 19.595 | 47.799 | 1.00 | 77.74  | O |
| ATOM | 3028 | N   | LYS | 388 | -30.642 | 21.590 | 48.680 | 1.00 | 178.53 | N |
| ATOM | 3029 | CA  | LYS | 388 | -30.072 | 21.206 | 49.942 | 1.00 | 178.53 | C |
| ATOM | 3030 | CB  | LYS | 388 | -30.182 | 22.306 | 51.025 | 1.00 | 178.53 | C |
| ATOM | 3031 | CG  | LYS | 388 | -31.544 | 22.994 | 51.174 | 1.00 | 178.53 | C |
| ATOM | 3032 | CD  | LYS | 388 | -32.638 | 22.150 | 51.826 | 1.00 | 178.53 | C |
| ATOM | 3033 | CE  | LYS | 388 | -33.927 | 22.927 | 52.103 | 1.00 | 178.53 | C |
| ATOM | 3034 | NZ  | LYS | 388 | -33.765 | 23.765 | 53.312 | 1.00 | 178.53 | N |
| ATOM | 3035 | C   | LYS | 388 | -30.600 | 19.893 | 50.465 | 1.00 | 178.53 | C |
| ATOM | 3036 | O   | LYS | 388 | -29.797 | 19.025 | 50.807 | 1.00 | 178.53 | O |
| ATOM | 3037 | N   | ARG | 389 | -31.928 | 19.707 | 50.599 | 1.00 | 100.04 | N |
| ATOM | 3038 | CA  | ARG | 389 | -32.453 | 18.443 | 51.056 | 1.00 | 100.04 | C |
| ATOM | 3039 | CB  | ARG | 389 | -33.853 | 18.571 | 51.677 | 1.00 | 100.04 | C |
| ATOM | 3040 | CG  | ARG | 389 | -33.831 | 19.214 | 53.063 | 1.00 | 100.04 | C |

|      |      |     |     |     |         |        |        |            |   |
|------|------|-----|-----|-----|---------|--------|--------|------------|---|
| ATOM | 3041 | CD  | ARG | 389 | -35.155 | 19.093 | 53.819 | 1.00100.04 | C |
| ATOM | 3042 | NE  | ARG | 389 | -34.888 | 19.489 | 55.230 | 1.00100.04 | N |
| ATOM | 3043 | CZ  | ARG | 389 | -35.701 | 19.043 | 56.230 | 1.00100.04 | C |
| ATOM | 3044 | NH1 | ARG | 389 | -36.793 | 18.278 | 55.932 | 1.00100.04 | N |
| ATOM | 3045 | NH2 | ARG | 389 | -35.417 | 19.351 | 57.529 | 1.00100.04 | N |
| ATOM | 3046 | C   | ARG | 389 | -32.537 | 17.370 | 49.999 | 1.00100.04 | C |
| ATOM | 3047 | O   | ARG | 389 | -32.130 | 16.233 | 50.234 | 1.00100.04 | O |
| ATOM | 3048 | N   | LYS | 390 | -33.064 | 17.705 | 48.799 | 1.00139.39 | N |
| ATOM | 3049 | CA  | LYS | 390 | -33.371 | 16.712 | 47.798 | 1.00139.39 | C |
| ATOM | 3050 | CB  | LYS | 390 | -34.555 | 17.089 | 46.884 | 1.00139.39 | C |
| ATOM | 3051 | CG  | LYS | 390 | -35.913 | 17.235 | 47.576 | 1.00139.39 | C |
| ATOM | 3052 | CD  | LYS | 390 | -36.071 | 18.521 | 48.384 | 1.00139.39 | C |
| ATOM | 3053 | CE  | LYS | 390 | -37.499 | 18.747 | 48.886 | 1.00139.39 | C |
| ATOM | 3054 | NZ  | LYS | 390 | -37.963 | 17.567 | 49.650 | 1.00139.39 | N |
| ATOM | 3055 | C   | LYS | 390 | -32.219 | 16.479 | 46.867 | 1.00139.39 | C |
| ATOM | 3056 | O   | LYS | 390 | -31.352 | 17.332 | 46.701 | 1.00139.39 | O |
| ATOM | 3057 | N   | ARG | 391 | -32.191 | 15.283 | 46.231 | 1.0077.43  | N |
| ATOM | 3058 | CA  | ARG | 391 | -31.181 | 14.967 | 45.255 | 1.0077.43  | C |
| ATOM | 3059 | CB  | ARG | 391 | -30.347 | 13.710 | 45.570 | 1.0077.43  | C |
| ATOM | 3060 | CG  | ARG | 391 | -29.366 | 13.858 | 46.735 | 1.0077.43  | C |
| ATOM | 3061 | CD  | ARG | 391 | -28.504 | 12.610 | 46.952 | 1.0077.43  | C |
| ATOM | 3062 | NE  | ARG | 391 | -27.618 | 12.854 | 48.128 | 1.0077.43  | N |
| ATOM | 3063 | CZ  | ARG | 391 | -26.313 | 13.223 | 47.962 | 1.0077.43  | C |
| ATOM | 3064 | NH1 | ARG | 391 | -25.792 | 13.374 | 46.711 | 1.0077.43  | N |
| ATOM | 3065 | NH2 | ARG | 391 | -25.521 | 13.428 | 49.055 | 1.0077.43  | N |
| ATOM | 3066 | C   | ARG | 391 | -31.902 | 14.682 | 43.974 | 1.0077.43  | C |
| ATOM | 3067 | O   | ARG | 391 | -32.991 | 14.112 | 43.979 | 1.0077.43  | O |
| ATOM | 3068 | N   | PRO | 392 | -31.320 | 15.073 | 42.872 | 1.0096.37  | N |
| ATOM | 3069 | CA  | PRO | 392 | -31.936 | 14.857 | 41.590 | 1.0096.37  | C |
| ATOM | 3070 | CD  | PRO | 392 | -30.421 | 16.215 | 42.862 | 1.0096.37  | C |
| ATOM | 3071 | CB  | PRO | 392 | -31.127 | 15.684 | 40.594 | 1.0096.37  | C |
| ATOM | 3072 | CG  | PRO | 392 | -30.544 | 16.820 | 41.453 | 1.0096.37  | C |
| ATOM | 3073 | C   | PRO | 392 | -31.938 | 13.404 | 41.261 | 1.0096.37  | C |
| ATOM | 3074 | O   | PRO | 392 | -30.959 | 12.732 | 41.586 | 1.0096.37  | O |
| ATOM | 3075 | N   | ARG | 393 | -33.007 | 12.912 | 40.601 | 1.00111.60 | N |
| ATOM | 3076 | CA  | ARG | 393 | -33.077 | 11.518 | 40.278 | 1.00111.60 | C |
| ATOM | 3077 | CB  | ARG | 393 | -33.884 | 10.685 | 41.285 | 1.00111.60 | C |
| ATOM | 3078 | CG  | ARG | 393 | -35.351 | 11.106 | 41.400 | 1.00111.60 | C |
| ATOM | 3079 | CD  | ARG | 393 | -36.169 | 10.166 | 42.285 | 1.00111.60 | C |
| ATOM | 3080 | NE  | ARG | 393 | -37.562 | 10.690 | 42.368 | 1.00111.60 | N |
| ATOM | 3081 | CZ  | ARG | 393 | -38.501 | 10.332 | 41.444 | 1.00111.60 | C |
| ATOM | 3082 | NH1 | ARG | 393 | -38.162 | 9.546  | 40.381 | 1.00111.60 | N |
| ATOM | 3083 | NH2 | ARG | 393 | -39.786 | 10.762 | 41.597 | 1.00111.60 | N |
| ATOM | 3084 | C   | ARG | 393 | -33.761 | 11.349 | 38.960 | 1.00111.60 | C |
| ATOM | 3085 | O   | ARG | 393 | -34.378 | 12.265 | 38.417 | 1.00111.60 | O |
| ATOM | 3086 | N   | VAL | 394 | -33.642 | 10.126 | 38.413 | 1.00110.07 | N |
| ATOM | 3087 | CA  | VAL | 394 | -34.206 | 9.743  | 37.153 | 1.00110.07 | C |
| ATOM | 3088 | CB  | VAL | 394 | -33.407 | 8.623  | 36.546 | 1.00110.07 | C |
| ATOM | 3089 | CG1 | VAL | 394 | -33.488 | 7.411  | 37.493 | 1.00110.07 | C |
| ATOM | 3090 | CG2 | VAL | 394 | -33.891 | 8.347  | 35.116 | 1.00110.07 | C |
| ATOM | 3091 | C   | VAL | 394 | -35.595 | 9.255  | 37.421 | 1.00110.07 | C |
| ATOM | 3092 | O   | VAL | 394 | -35.830 | 8.549  | 38.399 | 1.00110.07 | O |
| ATOM | 3093 | N   | CYS | 395 | -36.566 | 9.656  | 36.573 | 1.0065.62  | N |
| ATOM | 3094 | CA  | CYS | 395 | -37.927 | 9.217  | 36.711 | 1.0065.62  | C |
| ATOM | 3095 | CB  | CYS | 395 | -38.941 | 10.170 | 36.046 | 1.0065.62  | C |
| ATOM | 3096 | SG  | CYS | 395 | -38.933 | 11.829 | 36.791 | 1.0065.62  | S |
| ATOM | 3097 | C   | CYS | 395 | -38.028 | 7.902  | 36.012 | 1.0065.62  | C |
| ATOM | 3098 | O   | CYS | 395 | -37.253 | 7.618  | 35.101 | 1.0065.62  | O |
| ATOM | 3099 | N   | THR | 396 | -39.015 | 7.073  | 36.407 | 1.0066.22  | N |
| ATOM | 3100 | CA  | THR | 396 | -39.121 | 5.756  | 35.852 | 1.0066.22  | C |
| ATOM | 3101 | CB  | THR | 396 | -39.243 | 4.688  | 36.899 | 1.0066.22  | C |
| ATOM | 3102 | CG1 | THR | 396 | -40.441 | 4.867  | 37.639 | 1.0066.22  | O |
| ATOM | 3103 | CG2 | THR | 396 | -38.027 | 4.779  | 37.836 | 1.0066.22  | C |
| ATOM | 3104 | C   | THR | 396 | -40.348 | 5.661  | 35.005 | 1.0066.22  | C |
| ATOM | 3105 | O   | THR | 396 | -41.233 | 6.515  | 35.030 | 1.0066.22  | O |
| ATOM | 3106 | N   | LYS | 397 | -40.390 | 4.579  | 34.208 | 1.00161.42 | N |

|      |      |     |     |     |         |        |        |            |   |
|------|------|-----|-----|-----|---------|--------|--------|------------|---|
| ATOM | 3107 | CA  | LYS | 397 | -41.460 | 4.256  | 33.317 | 1.00161.42 | C |
| ATOM | 3108 | CB  | LYS | 397 | -41.195 | 2.939  | 32.580 | 1.00161.42 | C |
| ATOM | 3109 | CG  | LYS | 397 | -39.851 | 2.914  | 31.858 | 1.00161.42 | C |
| ATOM | 3110 | CD  | LYS | 397 | -39.465 | 1.527  | 31.349 | 1.00161.42 | C |
| ATOM | 3111 | CE  | LYS | 397 | -39.188 | 0.517  | 32.459 | 1.00161.42 | C |
| ATOM | 3112 | NZ  | LYS | 397 | -39.043 | -0.832 | 31.874 | 1.00161.42 | N |
| ATOM | 3113 | C   | LYS | 397 | -42.682 | 4.027  | 34.150 | 1.00161.42 | C |
| ATOM | 3114 | O   | LYS | 397 | -43.791 | 4.386  | 33.752 | 1.00161.42 | O |
| ATOM | 3115 | N   | GLU | 398 | -42.495 | 3.412  | 35.335 | 1.00145.70 | N |
| ATOM | 3116 | CA  | GLU | 398 | -43.593 | 3.041  | 36.182 | 1.00145.70 | C |
| ATOM | 3117 | CB  | GLU | 398 | -43.166 | 2.430  | 37.537 | 1.00145.70 | C |
| ATOM | 3118 | CG  | GLU | 398 | -42.036 | 1.390  | 37.540 | 1.00145.70 | C |
| ATOM | 3119 | CD  | GLU | 398 | -41.967 | 0.633  | 36.228 | 1.00145.70 | C |
| ATOM | 3120 | OE1 | GLU | 398 | -42.894 | -0.169 | 35.945 | 1.00145.70 | O |
| ATOM | 3121 | OE2 | GLU | 398 | -40.965 | 0.844  | 35.496 | 1.00145.70 | O |
| ATOM | 3122 | C   | GLU | 398 | -44.316 | 4.288  | 36.593 | 1.00145.70 | C |
| ATOM | 3123 | O   | GLU | 398 | -45.544 | 4.351  | 36.549 | 1.00145.70 | O |
| ATOM | 3124 | N   | GLU | 399 | -43.556 | 5.325  | 37.000 | 1.00109.76 | N |
| ATOM | 3125 | CA  | GLU | 399 | -44.136 | 6.545  | 37.489 | 1.00109.76 | C |
| ATOM | 3126 | CB  | GLU | 399 | -43.113 | 7.645  | 37.803 | 1.00109.76 | C |
| ATOM | 3127 | CG  | GLU | 399 | -42.152 | 7.377  | 38.951 | 1.00109.76 | C |
| ATOM | 3128 | CD  | GLU | 399 | -41.202 | 8.563  | 38.931 | 1.00109.76 | C |
| ATOM | 3129 | OE1 | GLU | 399 | -40.408 | 8.665  | 37.959 | 1.00109.76 | O |
| ATOM | 3130 | OE2 | GLU | 399 | -41.277 | 9.397  | 39.870 | 1.00109.76 | O |
| ATOM | 3131 | C   | GLU | 399 | -44.918 | 7.156  | 36.391 | 1.00109.76 | C |
| ATOM | 3132 | O   | GLU | 399 | -46.014 | 7.678  | 36.584 | 1.00109.76 | O |
| ATOM | 3133 | N   | PHE | 400 | -44.330 | 7.103  | 35.195 | 1.00277.32 | N |
| ATOM | 3134 | CA  | PHE | 400 | -44.880 | 7.716  | 34.038 | 1.00277.32 | C |
| ATOM | 3135 | CB  | PHE | 400 | -43.857 | 7.573  | 32.897 | 1.00277.32 | C |
| ATOM | 3136 | CG  | PHE | 400 | -44.464 | 7.880  | 31.588 | 1.00277.32 | C |
| ATOM | 3137 | CD1 | PHE | 400 | -44.939 | 9.131  | 31.283 | 1.00277.32 | C |
| ATOM | 3138 | CD2 | PHE | 400 | -44.505 | 6.885  | 30.643 | 1.00277.32 | C |
| ATOM | 3139 | CE1 | PHE | 400 | -45.485 | 9.365  | 30.044 | 1.00277.32 | C |
| ATOM | 3140 | CE2 | PHE | 400 | -45.047 | 7.116  | 29.404 | 1.00277.32 | C |
| ATOM | 3141 | CZ  | PHE | 400 | -45.542 | 8.360  | 29.106 | 1.00277.32 | C |
| ATOM | 3142 | C   | PHE | 400 | -46.228 | 7.140  | 33.722 | 1.00277.32 | C |
| ATOM | 3143 | O   | PHE | 400 | -47.193 | 7.878  | 33.523 | 1.00277.32 | O |
| ATOM | 3144 | N   | ILE | 401 | -46.349 | 5.803  | 33.709 | 1.00150.95 | N |
| ATOM | 3145 | CA  | ILE | 401 | -47.605 | 5.191  | 33.362 | 1.00150.95 | C |
| ATOM | 3146 | CB  | ILE | 401 | -47.502 | 3.709  | 33.207 | 1.00150.95 | C |
| ATOM | 3147 | CG1 | ILE | 401 | -46.584 | 3.384  | 32.016 | 1.00150.95 | C |
| ATOM | 3148 | CG2 | ILE | 401 | -48.919 | 3.128  | 33.077 | 1.00150.95 | C |
| ATOM | 3149 | CD1 | ILE | 401 | -46.217 | 1.905  | 31.902 | 1.00150.95 | C |
| ATOM | 3150 | C   | ILE | 401 | -48.660 | 5.481  | 34.385 | 1.00150.95 | C |
| ATOM | 3151 | O   | ILE | 401 | -49.792 | 5.818  | 34.039 | 1.00150.95 | O |
| ATOM | 3152 | N   | ASN | 402 | -48.321 | 5.374  | 35.681 | 1.00160.21 | N |
| ATOM | 3153 | CA  | ASN | 402 | -49.315 | 5.545  | 36.703 | 1.00160.21 | C |
| ATOM | 3154 | CB  | ASN | 402 | -48.742 | 5.348  | 38.122 | 1.00160.21 | C |
| ATOM | 3155 | CG  | ASN | 402 | -48.450 | 3.865  | 38.328 | 1.00160.21 | C |
| ATOM | 3156 | OD1 | ASN | 402 | -49.333 | 3.019  | 38.185 | 1.00160.21 | O |
| ATOM | 3157 | ND2 | ASN | 402 | -47.177 | 3.534  | 38.676 | 1.00160.21 | N |
| ATOM | 3158 | C   | ASN | 402 | -49.862 | 6.933  | 36.607 | 1.00160.21 | C |
| ATOM | 3159 | O   | ASN | 402 | -51.063 | 7.170  | 36.733 | 1.00160.21 | O |
| ATOM | 3160 | N   | LYS | 403 | -48.943 | 7.875  | 36.369 | 1.00587.91 | N |
| ATOM | 3161 | CA  | LYS | 403 | -49.094 | 9.292  | 36.249 | 1.00587.91 | C |
| ATOM | 3162 | CB  | LYS | 403 | -47.722 | 9.864  | 35.855 | 1.00587.91 | C |
| ATOM | 3163 | CG  | LYS | 403 | -47.565 | 11.377 | 35.730 | 1.00587.91 | C |
| ATOM | 3164 | CD  | LYS | 403 | -47.032 | 12.073 | 36.980 | 1.00587.91 | C |
| ATOM | 3165 | CE  | LYS | 403 | -47.911 | 11.987 | 38.219 | 1.00587.91 | C |
| ATOM | 3166 | NZ  | LYS | 403 | -47.327 | 12.846 | 39.272 | 1.00587.91 | N |
| ATOM | 3167 | C   | LYS | 403 | -49.935 | 9.650  | 35.066 | 1.00587.91 | C |
| ATOM | 3168 | O   | LYS | 403 | -50.786 | 10.536 | 35.148 | 1.00587.91 | O |
| ATOM | 3169 | N   | VAL | 404 | -49.724 | 8.941  | 33.937 | 1.00594.09 | N |
| ATOM | 3170 | CA  | VAL | 404 | -50.202 | 9.482  | 32.691 | 1.00594.09 | C |
| ATOM | 3171 | CB  | VAL | 404 | -49.828 | 8.733  | 31.432 | 1.00594.09 | C |
| ATOM | 3172 | CG1 | VAL | 404 | -48.341 | 8.969  | 31.158 | 1.00594.09 | C |



|      |      |         |     |         |        |        |            |   |
|------|------|---------|-----|---------|--------|--------|------------|---|
| ATOM | 3173 | CG2 VAL | 404 | -50.182 | 7.248  | 31.553 | 1.00594.09 | C |
| ATOM | 3174 | C VAL   | 404 | -51.636 | 9.787  | 32.659 | 1.00594.09 | C |
| ATOM | 3175 | O VAL   | 404 | -51.961 | 10.939 | 32.447 | 1.00594.09 | O |
| ATOM | 3176 | N ARG   | 405 | -52.543 | 8.856  | 32.932 | 1.00765.42 | N |
| ATOM | 3177 | CA ARG  | 405 | -53.919 | 9.225  | 32.764 | 1.00765.42 | C |
| ATOM | 3178 | CB ARG  | 405 | -54.407 | 10.513 | 33.483 | 1.00765.42 | C |
| ATOM | 3179 | CG ARG  | 405 | -54.479 | 10.278 | 34.998 | 1.00765.42 | C |
| ATOM | 3180 | CD ARG  | 405 | -53.583 | 11.182 | 35.850 | 1.00765.42 | C |
| ATOM | 3181 | NE ARG  | 405 | -54.079 | 12.580 | 35.762 | 1.00765.42 | N |
| ATOM | 3182 | CZ ARG  | 405 | -53.230 | 13.567 | 35.353 | 1.00765.42 | C |
| ATOM | 3183 | NH1 ARG | 405 | -51.964 | 13.249 | 34.953 | 1.00765.42 | N |
| ATOM | 3184 | NH2 ARG | 405 | -53.642 | 14.868 | 35.353 | 1.00765.42 | N |
| ATOM | 3185 | C ARG   | 405 | -54.215 | 9.122  | 31.320 | 1.00765.42 | C |
| ATOM | 3186 | O ARG   | 405 | -53.492 | 9.583  | 30.429 | 1.00765.42 | O |
| ATOM | 3187 | N SER   | 406 | -55.363 | 8.484  | 31.107 | 1.00623.39 | N |
| ATOM | 3188 | CA SER  | 406 | -55.715 | 7.899  | 29.859 | 1.00623.39 | C |
| ATOM | 3189 | CB SER  | 406 | -57.076 | 7.202  | 29.929 | 1.00623.39 | C |
| ATOM | 3190 | OG SER  | 406 | -58.069 | 8.154  | 30.277 | 1.00623.39 | O |
| ATOM | 3191 | C SER   | 406 | -55.738 | 8.818  | 28.687 | 1.00623.39 | C |
| ATOM | 3192 | O SER   | 406 | -55.292 | 8.418  | 27.616 | 1.00623.39 | O |
| ATOM | 3193 | N ASN   | 407 | -56.248 | 10.054 | 28.805 | 1.00999.99 | N |
| ATOM | 3194 | CA ASN  | 407 | -56.339 | 10.785 | 27.571 | 1.00999.99 | C |
| ATOM | 3195 | CB ASN  | 407 | -57.717 | 11.437 | 27.371 | 1.00999.99 | C |
| ATOM | 3196 | CG ASN  | 407 | -58.706 | 10.355 | 26.958 | 1.00999.99 | C |
| ATOM | 3197 | OD1 ASN | 407 | -59.120 | 9.521  | 27.762 | 1.00999.99 | O |
| ATOM | 3198 | ND2 ASN | 407 | -59.102 | 10.375 | 25.659 | 1.00999.99 | N |
| ATOM | 3199 | C ASN   | 407 | -55.314 | 11.872 | 27.479 | 1.00999.99 | C |
| ATOM | 3200 | O ASN   | 407 | -55.628 | 13.002 | 27.107 | 1.00999.99 | O |
| ATOM | 3201 | N ALA   | 408 | -54.039 | 11.555 | 27.759 | 1.00894.59 | N |
| ATOM | 3202 | CA ALA  | 408 | -53.018 | 12.553 | 27.605 | 1.00894.59 | C |
| ATOM | 3203 | CB ALA  | 408 | -51.684 | 12.167 | 28.260 | 1.00894.59 | C |
| ATOM | 3204 | C ALA   | 408 | -52.764 | 12.720 | 26.139 | 1.00894.59 | C |
| ATOM | 3205 | O ALA   | 408 | -52.927 | 11.779 | 25.366 | 1.00894.59 | O |
| ATOM | 3206 | N ALA   | 409 | -52.346 | 13.925 | 25.706 | 1.00336.47 | N |
| ATOM | 3207 | CA ALA  | 409 | -52.128 | 14.125 | 24.304 | 1.00336.47 | C |
| ATOM | 3208 | CB ALA  | 409 | -51.727 | 15.570 | 23.949 | 1.00336.47 | C |
| ATOM | 3209 | C ALA   | 409 | -51.010 | 13.257 | 23.893 | 1.00336.47 | C |
| ATOM | 3210 | O ALA   | 409 | -50.149 | 12.879 | 24.693 | 1.00336.47 | O |
| ATOM | 3211 | N LEU   | 410 | -51.007 | 12.882 | 22.610 | 1.00792.47 | N |
| ATOM | 3212 | CA LEU  | 410 | -49.855 | 12.132 | 22.280 | 1.00792.47 | C |
| ATOM | 3213 | CB LEU  | 410 | -49.831 | 11.317 | 20.997 | 1.00792.47 | C |
| ATOM | 3214 | CG LEU  | 410 | -50.847 | 10.188 | 21.187 | 1.00792.47 | C |
| ATOM | 3215 | CD1 LEU | 410 | -50.830 | 9.664  | 22.637 | 1.00792.47 | C |
| ATOM | 3216 | CD2 LEU | 410 | -52.239 | 10.583 | 20.707 | 1.00792.47 | C |
| ATOM | 3217 | C LEU   | 410 | -48.535 | 12.944 | 22.502 | 1.00792.47 | C |
| ATOM | 3218 | O LEU   | 410 | -47.721 | 12.206 | 22.934 | 1.00792.47 | O |
| ATOM | 3219 | N GLY   | 411 | -48.185 | 14.300 | 22.371 | 1.00966.49 | N |
| ATOM | 3220 | CA GLY  | 411 | -46.728 | 14.978 | 22.451 | 1.00966.49 | C |
| ATOM | 3221 | C GLY   | 411 | -45.319 | 15.188 | 21.250 | 1.00966.49 | C |
| ATOM | 3222 | O GLY   | 411 | -44.266 | 15.570 | 21.662 | 1.00966.49 | O |
| ATOM | 3223 | N ALA   | 412 | -45.322 | 14.862 | 19.782 | 1.00999.99 | N |
| ATOM | 3224 | CA ALA  | 412 | -45.073 | 14.581 | 18.279 | 1.00999.99 | C |
| ATOM | 3225 | CB ALA  | 412 | -43.711 | 13.907 | 18.031 | 1.00999.99 | C |
| ATOM | 3226 | C ALA   | 412 | -45.985 | 14.172 | 16.979 | 1.00999.99 | C |
| ATOM | 3227 | O ALA   | 412 | -47.210 | 14.117 | 16.787 | 1.00999.99 | O |
| ATOM | 3228 | N ILE   | 413 | -45.183 | 14.255 | 15.881 | 1.00999.99 | N |
| ATOM | 3229 | CA ILE  | 413 | -45.090 | 14.240 | 14.428 | 1.00999.99 | C |
| ATOM | 3230 | CB ILE  | 413 | -44.373 | 15.447 | 13.933 | 1.00999.99 | C |
| ATOM | 3231 | CG1 ILE | 413 | -43.444 | 15.990 | 15.006 | 1.00999.99 | C |
| ATOM | 3232 | CG2 ILE | 413 | -45.386 | 16.423 | 13.323 | 1.00999.99 | C |
| ATOM | 3233 | CD1 ILE | 413 | -43.062 | 17.417 | 14.661 | 1.00999.99 | C |
| ATOM | 3234 | C ILE   | 413 | -44.938 | 13.173 | 13.353 | 1.00999.99 | C |
| ATOM | 3235 | O ILE   | 413 | -45.099 | 13.606 | 12.204 | 1.00999.99 | O |
| ATOM | 3236 | N PHE   | 414 | -44.422 | 11.937 | 13.553 | 1.00999.99 | N |
| ATOM | 3237 | CA PHE  | 414 | -44.362 | 10.991 | 12.445 | 1.00999.99 | C |
| ATOM | 3238 | CB PHE  | 414 | -43.541 | 9.686  | 12.620 | 1.00999.99 | C |

|      |      |     |     |     |         |        |        |            |   |
|------|------|-----|-----|-----|---------|--------|--------|------------|---|
| ATOM | 3239 | CG  | PHE | 414 | -42.060 | 9.524  | 12.445 | 1.00999.99 | C |
| ATOM | 3240 | CD1 | PHE | 414 | -41.487 | 9.402  | 11.199 | 1.00999.99 | C |
| ATOM | 3241 | CD2 | PHE | 414 | -41.262 | 9.357  | 13.554 | 1.00999.99 | C |
| ATOM | 3242 | CE1 | PHE | 414 | -40.136 | 9.193  | 11.062 | 1.00999.99 | C |
| ATOM | 3243 | CE2 | PHE | 414 | -39.909 | 9.147  | 13.423 | 1.00999.99 | C |
| ATOM | 3244 | CZ  | PHE | 414 | -39.337 | 9.069  | 12.177 | 1.00999.99 | C |
| ATOM | 3245 | C   | PHE | 414 | -45.659 | 10.263 | 12.399 | 1.00999.99 | C |
| ATOM | 3246 | O   | PHE | 414 | -46.419 | 10.225 | 13.364 | 1.00999.99 | O |
| ATOM | 3247 | N   | GLU | 415 | -45.900 | 9.620  | 11.241 | 1.00999.99 | N |
| ATOM | 3248 | CA  | GLU | 415 | -47.049 | 8.797  | 11.054 | 1.00999.99 | C |
| ATOM | 3249 | CB  | GLU | 415 | -47.287 | 8.566  | 9.581  | 1.00999.99 | C |
| ATOM | 3250 | CG  | GLU | 415 | -47.765 | 9.924  | 9.050  | 1.00999.99 | C |
| ATOM | 3251 | CD  | GLU | 415 | -49.162 | 10.107 | 9.609  | 1.00999.99 | C |
| ATOM | 3252 | OE1 | GLU | 415 | -49.877 | 9.078  | 9.721  | 1.00999.99 | O |
| ATOM | 3253 | OE2 | GLU | 415 | -49.527 | 11.260 | 9.966  | 1.00999.99 | O |
| ATOM | 3254 | C   | GLU | 415 | -46.922 | 7.566  | 11.884 | 1.00999.99 | C |
| ATOM | 3255 | O   | GLU | 415 | -47.898 | 7.069  | 12.439 | 1.00999.99 | O |
| ATOM | 3256 | N   | GLU | 416 | -45.683 | 7.065  | 12.036 | 1.00999.99 | N |
| ATOM | 3257 | CA  | GLU | 416 | -45.489 | 5.891  | 12.831 | 1.00999.99 | C |
| ATOM | 3258 | CB  | GLU | 416 | -44.170 | 5.209  | 12.574 | 1.00999.99 | C |
| ATOM | 3259 | CG  | GLU | 416 | -43.025 | 6.185  | 12.458 | 1.00999.99 | C |
| ATOM | 3260 | CD  | GLU | 416 | -41.895 | 5.244  | 12.199 | 1.00999.99 | C |
| ATOM | 3261 | OE1 | GLU | 416 | -42.172 | 4.026  | 12.342 | 1.00999.99 | O |
| ATOM | 3262 | OE2 | GLU | 416 | -40.773 | 5.689  | 11.850 | 1.00999.99 | O |
| ATOM | 3263 | C   | GLU | 416 | -45.763 | 6.120  | 14.291 | 1.00999.99 | C |
| ATOM | 3264 | O   | GLU | 416 | -46.060 | 5.156  | 14.998 | 1.00999.99 | O |
| ATOM | 3265 | N   | GLU | 417 | -45.630 | 7.356  | 14.836 | 1.00999.99 | N |
| ATOM | 3266 | CA  | GLU | 417 | -46.000 | 7.342  | 16.215 | 1.00999.99 | C |
| ATOM | 3267 | CB  | GLU | 417 | -45.190 | 8.192  | 17.188 | 1.00999.99 | C |
| ATOM | 3268 | CG  | GLU | 417 | -45.162 | 9.664  | 16.854 | 1.00999.99 | C |
| ATOM | 3269 | CD  | GLU | 417 | -43.792 | 9.921  | 16.276 | 1.00999.99 | C |
| ATOM | 3270 | OE1 | GLU | 417 | -43.015 | 8.943  | 16.115 | 1.00999.99 | O |
| ATOM | 3271 | OE2 | GLU | 417 | -43.501 | 11.112 | 15.999 | 1.00999.99 | O |
| ATOM | 3272 | C   | GLU | 417 | -47.444 | 7.621  | 16.391 | 1.00999.99 | C |
| ATOM | 3273 | O   | GLU | 417 | -47.895 | 7.911  | 17.504 | 1.00999.99 | O |
| ATOM | 3274 | N   | LYS | 418 | -48.250 | 7.499  | 15.322 | 1.00999.99 | N |
| ATOM | 3275 | CA  | LYS | 418 | -49.593 | 7.661  | 15.750 | 1.00999.99 | C |
| ATOM | 3276 | CB  | LYS | 418 | -50.338 | 8.906  | 15.233 | 1.00999.99 | C |
| ATOM | 3277 | CG  | LYS | 418 | -51.394 | 9.352  | 16.255 | 1.00999.99 | C |
| ATOM | 3278 | CD  | LYS | 418 | -51.571 | 10.871 | 16.359 | 1.00999.99 | C |
| ATOM | 3279 | CE  | LYS | 418 | -52.837 | 11.429 | 15.717 | 1.00999.99 | C |
| ATOM | 3280 | NZ  | LYS | 418 | -52.779 | 11.232 | 14.255 | 1.00999.99 | N |
| ATOM | 3281 | C   | LYS | 418 | -50.333 | 6.394  | 15.593 | 1.00999.99 | C |
| ATOM | 3282 | O   | LYS | 418 | -51.343 | 6.317  | 14.905 | 1.00999.99 | O |
| ATOM | 3283 | N   | GLU | 419 | -49.788 | 5.364  | 16.267 | 1.00597.37 | N |
| ATOM | 3284 | CA  | GLU | 419 | -50.253 | 4.009  | 16.303 | 1.00597.37 | C |
| ATOM | 3285 | CB  | GLU | 419 | -49.217 | 3.061  | 16.931 | 1.00597.37 | C |
| ATOM | 3286 | CG  | GLU | 419 | -47.789 | 3.223  | 16.397 | 1.00597.37 | C |
| ATOM | 3287 | CD  | GLU | 419 | -47.507 | 2.260  | 15.257 | 1.00597.37 | C |
| ATOM | 3288 | OE1 | GLU | 419 | -48.473 | 1.750  | 14.634 | 1.00597.37 | O |
| ATOM | 3289 | OE2 | GLU | 419 | -46.296 | 2.027  | 14.997 | 1.00597.37 | O |
| ATOM | 3290 | C   | GLU | 419 | -51.436 | 3.905  | 17.215 | 1.00597.37 | C |
| ATOM | 3291 | O   | GLU | 419 | -52.292 | 3.040  | 17.036 | 1.00597.37 | O |
| ATOM | 3292 | N   | TRP | 420 | -51.493 | 4.746  | 18.267 | 1.00831.37 | N |
| ATOM | 3293 | CA  | TRP | 420 | -52.541 | 4.510  | 19.219 | 1.00831.37 | C |
| ATOM | 3294 | CB  | TRP | 420 | -52.085 | 4.566  | 20.676 | 1.00831.37 | C |
| ATOM | 3295 | CG  | TRP | 420 | -50.910 | 3.689  | 20.943 | 1.00831.37 | C |
| ATOM | 3296 | CD2 | TRP | 420 | -49.575 | 4.184  | 20.818 | 1.00831.37 | C |
| ATOM | 3297 | CD1 | TRP | 420 | -50.818 | 2.378  | 21.302 | 1.00831.37 | C |
| ATOM | 3298 | NE1 | TRP | 420 | -49.495 | 2.018  | 21.395 | 1.00831.37 | N |
| ATOM | 3299 | CE2 | TRP | 420 | -48.721 | 3.122  | 21.101 | 1.00831.37 | C |
| ATOM | 3300 | CE3 | TRP | 420 | -49.109 | 5.424  | 20.489 | 1.00831.37 | C |
| ATOM | 3301 | CZ2 | TRP | 420 | -47.368 | 3.286  | 21.059 | 1.00831.37 | C |
| ATOM | 3302 | CZ3 | TRP | 420 | -47.745 | 5.590  | 20.450 | 1.00831.37 | C |
| ATOM | 3303 | CH2 | TRP | 420 | -46.894 | 4.538  | 20.730 | 1.00831.37 | C |
| ATOM | 3304 | C   | TRP | 420 | -53.491 | 5.644  | 19.149 | 1.00831.37 | C |

|      |      |     |     |     |         |        |        |            |   |
|------|------|-----|-----|-----|---------|--------|--------|------------|---|
| ATOM | 3305 | O   | TRP | 420 | -53.174 | 6.720  | 18.647 | 1.00831.37 | O |
| ATOM | 3306 | N   | LYS | 421 | -54.737 | 5.379  | 19.559 | 1.00999.99 | N |
| ATOM | 3307 | CA  | LYS | 421 | -55.675 | 6.444  | 19.663 | 1.00999.99 | C |
| ATOM | 3308 | CB  | LYS | 421 | -57.143 | 6.019  | 19.496 | 1.00999.99 | C |
| ATOM | 3309 | CG  | LYS | 421 | -57.543 | 5.824  | 18.026 | 1.00999.99 | C |
| ATOM | 3310 | CD  | LYS | 421 | -57.490 | 7.098  | 17.166 | 1.00999.99 | C |
| ATOM | 3311 | CE  | LYS | 421 | -58.443 | 8.226  | 17.599 | 1.00999.99 | C |
| ATOM | 3312 | NZ  | LYS | 421 | -59.863 | 7.878  | 17.341 | 1.00999.99 | N |
| ATOM | 3313 | C   | LYS | 421 | -55.493 | 7.196  | 20.952 | 1.00999.99 | C |
| ATOM | 3314 | O   | LYS | 421 | -55.762 | 8.391  | 20.991 | 1.00999.99 | O |
| ATOM | 3315 | N   | THR | 422 | -55.068 | 6.528  | 22.055 | 1.00577.37 | N |
| ATOM | 3316 | CA  | THR | 422 | -54.952 | 7.233  | 23.312 | 1.00577.37 | C |
| ATOM | 3317 | CB  | THR | 422 | -56.091 | 7.002  | 24.259 | 1.00577.37 | C |
| ATOM | 3318 | OG1 | THR | 422 | -56.238 | 5.617  | 24.535 | 1.00577.37 | O |
| ATOM | 3319 | CG2 | THR | 422 | -57.373 | 7.582  | 23.633 | 1.00577.37 | C |
| ATOM | 3320 | C   | THR | 422 | -53.655 | 6.926  | 24.019 | 1.00577.37 | C |
| ATOM | 3321 | O   | THR | 422 | -52.940 | 5.985  | 23.683 | 1.00577.37 | O |
| ATOM | 3322 | N   | ALA | 423 | -53.306 | 7.779  | 25.011 | 1.00517.58 | N |
| ATOM | 3323 | CA  | ALA | 423 | -52.075 | 7.698  | 25.753 | 1.00517.58 | C |
| ATOM | 3324 | CB  | ALA | 423 | -51.877 | 8.891  | 26.700 | 1.00517.58 | C |
| ATOM | 3325 | C   | ALA | 423 | -52.025 | 6.460  | 26.586 | 1.00517.58 | C |
| ATOM | 3326 | O   | ALA | 423 | -51.022 | 5.750  | 26.581 | 1.00517.58 | O |
| ATOM | 3327 | N   | VAL | 424 | -53.114 | 6.152  | 27.313 | 1.00318.16 | N |
| ATOM | 3328 | CA  | VAL | 424 | -53.108 | 4.992  | 28.147 | 1.00318.16 | C |
| ATOM | 3329 | CB  | VAL | 424 | -54.260 | 4.903  | 29.102 | 1.00318.16 | C |
| ATOM | 3330 | CG1 | VAL | 424 | -54.470 | 3.442  | 29.525 | 1.00318.16 | C |
| ATOM | 3331 | CG2 | VAL | 424 | -53.822 | 5.720  | 30.333 | 1.00318.16 | C |
| ATOM | 3332 | C   | VAL | 424 | -52.962 | 3.773  | 27.311 | 1.00318.16 | C |
| ATOM | 3333 | O   | VAL | 424 | -52.416 | 2.769  | 27.760 | 1.00318.16 | O |
| ATOM | 3334 | N   | GLU | 425 | -53.460 | 3.821  | 26.070 | 1.00314.94 | N |
| ATOM | 3335 | CA  | GLU | 425 | -53.345 | 2.713  | 25.172 | 1.00314.94 | C |
| ATOM | 3336 | CB  | GLU | 425 | -54.119 | 3.018  | 23.876 | 1.00314.94 | C |
| ATOM | 3337 | CG  | GLU | 425 | -54.578 | 1.803  | 23.073 | 1.00314.94 | C |
| ATOM | 3338 | CD  | GLU | 425 | -55.481 | 2.325  | 21.961 | 1.00314.94 | C |
| ATOM | 3339 | OE1 | GLU | 425 | -56.716 | 2.427  | 22.190 | 1.00314.94 | O |
| ATOM | 3340 | OE2 | GLU | 425 | -54.942 | 2.641  | 20.868 | 1.00314.94 | O |
| ATOM | 3341 | C   | GLU | 425 | -51.890 | 2.495  | 24.859 | 1.00314.94 | C |
| ATOM | 3342 | O   | GLU | 425 | -51.400 | 1.365  | 24.855 | 1.00314.94 | O |
| ATOM | 3343 | N   | ALA | 426 | -51.161 | 3.601  | 24.611 | 1.00620.96 | N |
| ATOM | 3344 | CA  | ALA | 426 | -49.780 | 3.605  | 24.215 | 1.00620.96 | C |
| ATOM | 3345 | CB  | ALA | 426 | -49.292 | 5.035  | 23.927 | 1.00620.96 | C |
| ATOM | 3346 | C   | ALA | 426 | -48.885 | 3.055  | 25.286 | 1.00620.96 | C |
| ATOM | 3347 | O   | ALA | 426 | -47.997 | 2.250  | 25.001 | 1.00620.96 | O |
| ATOM | 3348 | N   | VAL | 427 | -49.093 | 3.466  | 26.552 | 1.00354.32 | N |
| ATOM | 3349 | CA  | VAL | 427 | -48.210 | 3.021  | 27.594 | 1.00354.32 | C |
| ATOM | 3350 | CB  | VAL | 427 | -48.349 | 3.724  | 28.919 | 1.00354.32 | C |
| ATOM | 3351 | CG1 | VAL | 427 | -47.986 | 5.206  | 28.721 | 1.00354.32 | C |
| ATOM | 3352 | CG2 | VAL | 427 | -49.751 | 3.496  | 29.495 | 1.00354.32 | C |
| ATOM | 3353 | C   | VAL | 427 | -48.365 | 1.548  | 27.786 | 1.00354.32 | C |
| ATOM | 3354 | O   | VAL | 427 | -47.432 | 0.881  | 28.232 | 1.00354.32 | O |
| ATOM | 3355 | N   | ASN | 428 | -49.558 | 1.006  | 27.477 | 1.00162.04 | N |
| ATOM | 3356 | CA  | ASN | 428 | -49.782 | -0.412 | 27.581 | 1.00162.04 | C |
| ATOM | 3357 | CB  | ASN | 428 | -51.097 | -0.888 | 26.922 | 1.00162.04 | C |
| ATOM | 3358 | CG  | ASN | 428 | -52.242 | -1.066 | 27.899 | 1.00162.04 | C |
| ATOM | 3359 | OD1 | ASN | 428 | -52.208 | -1.975 | 28.724 | 1.00162.04 | O |
| ATOM | 3360 | ND2 | ASN | 428 | -53.305 | -0.228 | 27.777 | 1.00162.04 | N |
| ATOM | 3361 | C   | ASN | 428 | -48.777 | -1.130 | 26.753 | 1.00162.04 | C |
| ATOM | 3362 | O   | ASN | 428 | -48.173 | -2.103 | 27.201 | 1.00162.04 | O |
| ATOM | 3363 | N   | ASP | 429 | -48.588 | -0.632 | 25.515 | 1.00843.81 | N |
| ATOM | 3364 | CA  | ASP | 429 | -47.847 | -1.280 | 24.473 | 1.00843.81 | C |
| ATOM | 3365 | CB  | ASP | 429 | -47.921 | -0.540 | 23.136 | 1.00843.81 | C |
| ATOM | 3366 | CG  | ASP | 429 | -49.338 | -0.663 | 22.652 | 1.00843.81 | C |
| ATOM | 3367 | OD1 | ASP | 429 | -50.249 | -0.484 | 23.498 | 1.00843.81 | O |
| ATOM | 3368 | OD2 | ASP | 429 | -49.536 | -0.949 | 21.443 | 1.00843.81 | O |
| ATOM | 3369 | C   | ASP | 429 | -46.391 | -1.389 | 24.755 | 1.00843.81 | C |
| ATOM | 3370 | O   | ASP | 429 | -45.694 | -0.435 | 25.096 | 1.00843.81 | O |

|      |      |     |     |     |         |        |        |            |   |
|------|------|-----|-----|-----|---------|--------|--------|------------|---|
| ATOM | 3371 | N   | PRO | 430 | -45.968 | -2.605 | 24.571 | 1.00242.10 | N |
| ATOM | 3372 | CA  | PRO | 430 | -44.583 | -2.985 | 24.631 | 1.00242.10 | C |
| ATOM | 3373 | CD  | PRO | 430 | -46.876 | -3.738 | 24.646 | 1.00242.10 | C |
| ATOM | 3374 | CB  | PRO | 430 | -44.595 | -4.525 | 24.590 | 1.00242.10 | C |
| ATOM | 3375 | CG  | PRO | 430 | -46.027 | -4.915 | 24.160 | 1.00242.10 | C |
| ATOM | 3376 | C   | PRO | 430 | -43.894 | -2.353 | 23.464 | 1.00242.10 | C |
| ATOM | 3377 | O   | PRO | 430 | -42.696 | -2.073 | 23.518 | 1.00242.10 | O |
| ATOM | 3378 | N   | ARG | 431 | -44.682 | -2.107 | 22.412 | 1.00710.83 | N |
| ATOM | 3379 | CA  | ARG | 431 | -44.372 | -1.559 | 21.128 | 1.00710.83 | C |
| ATOM | 3380 | CB  | ARG | 431 | -45.736 | -1.461 | 20.418 | 1.00710.83 | C |
| ATOM | 3381 | CG  | ARG | 431 | -45.816 | -0.367 | 19.377 | 1.00710.83 | C |
| ATOM | 3382 | CD  | ARG | 431 | -44.650 | -0.527 | 18.433 | 1.00710.83 | C |
| ATOM | 3383 | NE  | ARG | 431 | -45.120 | -0.320 | 17.048 | 1.00710.83 | N |
| ATOM | 3384 | CZ  | ARG | 431 | -45.678 | -1.358 | 16.356 | 1.00710.83 | C |
| ATOM | 3385 | NH1 | ARG | 431 | -46.295 | -2.388 | 17.006 | 1.00710.83 | N |
| ATOM | 3386 | NH2 | ARG | 431 | -45.563 | -1.372 | 14.999 | 1.00710.83 | N |
| ATOM | 3387 | C   | ARG | 431 | -43.807 | -0.178 | 21.274 | 1.00710.83 | C |
| ATOM | 3388 | O   | ARG | 431 | -42.834 | 0.223  | 20.634 | 1.00710.83 | O |
| ATOM | 3389 | N   | PHE | 432 | -44.454 | 0.574  | 22.154 | 1.00999.99 | N |
| ATOM | 3390 | CA  | PHE | 432 | -44.291 | 1.948  | 22.500 | 1.00999.99 | C |
| ATOM | 3391 | CB  | PHE | 432 | -45.401 | 2.137  | 23.535 | 1.00999.99 | C |
| ATOM | 3392 | CG  | PHE | 432 | -45.378 | 3.462  | 24.109 | 1.00999.99 | C |
| ATOM | 3393 | CD1 | PHE | 432 | -45.391 | 4.546  | 23.273 | 1.00999.99 | C |
| ATOM | 3394 | CD2 | PHE | 432 | -45.418 | 3.608  | 25.474 | 1.00999.99 | C |
| ATOM | 3395 | CE1 | PHE | 432 | -45.391 | 5.810  | 23.796 | 1.00999.99 | C |
| ATOM | 3396 | CE2 | PHE | 432 | -45.424 | 4.874  | 26.002 | 1.00999.99 | C |
| ATOM | 3397 | CZ  | PHE | 432 | -45.400 | 5.961  | 25.159 | 1.00999.99 | C |
| ATOM | 3398 | C   | PHE | 432 | -42.923 | 2.202  | 23.073 | 1.00999.99 | C |
| ATOM | 3399 | O   | PHE | 432 | -42.203 | 3.099  | 22.628 | 1.00999.99 | O |
| ATOM | 3400 | N   | TRP | 433 | -42.491 | 1.401  | 24.057 | 1.00446.12 | N |
| ATOM | 3401 | CA  | TRP | 433 | -41.220 | 1.732  | 24.631 | 1.00446.12 | C |
| ATOM | 3402 | CB  | TRP | 433 | -40.715 | 0.991  | 25.874 | 1.00446.12 | C |
| ATOM | 3403 | CG  | TRP | 433 | -41.513 | 0.995  | 27.151 | 1.00446.12 | C |
| ATOM | 3404 | CD2 | TRP | 433 | -42.150 | 2.080  | 27.862 | 1.00446.12 | C |
| ATOM | 3405 | CD1 | TRP | 433 | -41.775 | -0.130 | 27.864 | 1.00446.12 | C |
| ATOM | 3406 | NE1 | TRP | 433 | -42.512 | 0.173  | 28.976 | 1.00446.12 | N |
| ATOM | 3407 | CE2 | TRP | 433 | -42.758 | 1.523  | 28.989 | 1.00446.12 | C |
| ATOM | 3408 | CE3 | TRP | 433 | -42.234 | 3.421  | 27.608 | 1.00446.12 | C |
| ATOM | 3409 | CZ2 | TRP | 433 | -43.456 | 2.287  | 29.878 | 1.00446.12 | C |
| ATOM | 3410 | CZ3 | TRP | 433 | -42.937 | 4.190  | 28.513 | 1.00446.12 | C |
| ATOM | 3411 | CH2 | TRP | 433 | -43.535 | 3.636  | 29.626 | 1.00446.12 | C |
| ATOM | 3412 | C   | TRP | 433 | -40.137 | 1.466  | 23.638 | 1.00446.12 | C |
| ATOM | 3413 | O   | TRP | 433 | -39.052 | 2.023  | 23.764 | 1.00446.12 | O |
| ATOM | 3414 | N   | ALA | 434 | -40.349 | 0.548  | 22.678 | 1.00230.29 | N |
| ATOM | 3415 | CA  | ALA | 434 | -39.283 | 0.232  | 21.766 | 1.00230.29 | C |
| ATOM | 3416 | CB  | ALA | 434 | -39.683 | -0.817 | 20.713 | 1.00230.29 | C |
| ATOM | 3417 | C   | ALA | 434 | -38.890 | 1.472  | 21.025 | 1.00230.29 | C |
| ATOM | 3418 | O   | ALA | 434 | -37.708 | 1.734  | 20.811 | 1.00230.29 | O |
| ATOM | 3419 | N   | LEU | 435 | -39.882 | 2.270  | 20.610 | 1.00603.15 | N |
| ATOM | 3420 | CA  | LEU | 435 | -39.608 | 3.446  | 19.839 | 1.00603.15 | C |
| ATOM | 3421 | CB  | LEU | 435 | -40.940 | 3.930  | 19.208 | 1.00603.15 | C |
| ATOM | 3422 | CG  | LEU | 435 | -40.877 | 4.767  | 17.892 | 1.00603.15 | C |
| ATOM | 3423 | CD1 | LEU | 435 | -40.736 | 6.292  | 18.094 | 1.00603.15 | C |
| ATOM | 3424 | CD2 | LEU | 435 | -39.713 | 4.284  | 17.005 | 1.00603.15 | C |
| ATOM | 3425 | C   | LEU | 435 | -38.903 | 4.438  | 20.736 | 1.00603.15 | C |
| ATOM | 3426 | O   | LEU | 435 | -37.988 | 5.146  | 20.311 | 1.00603.15 | O |
| ATOM | 3427 | N   | VAL | 436 | -39.297 | 4.484  | 22.028 | 1.00384.95 | N |
| ATOM | 3428 | CA  | VAL | 436 | -38.718 | 5.366  | 23.017 | 1.00384.95 | C |
| ATOM | 3429 | CB  | VAL | 436 | -39.383 | 5.198  | 24.355 | 1.00384.95 | C |
| ATOM | 3430 | CG1 | VAL | 436 | -38.696 | 6.118  | 25.379 | 1.00384.95 | C |
| ATOM | 3431 | CG2 | VAL | 436 | -40.894 | 5.444  | 24.189 | 1.00384.95 | C |
| ATOM | 3432 | C   | VAL | 436 | -37.268 | 5.059  | 23.204 | 1.00384.95 | C |
| ATOM | 3433 | O   | VAL | 436 | -36.428 | 5.960  | 23.190 | 1.00384.95 | O |
| ATOM | 3434 | N   | ASP | 437 | -36.938 | 3.764  | 23.361 | 1.00136.55 | N |
| ATOM | 3435 | CA  | ASP | 437 | -35.591 | 3.372  | 23.658 | 1.00136.55 | C |
| ATOM | 3436 | CB  | ASP | 437 | -35.465 | 1.880  | 24.014 | 1.00136.55 | C |

|      |      |     |     |     |         |        |        |            |   |
|------|------|-----|-----|-----|---------|--------|--------|------------|---|
| ATOM | 3437 | CG  | ASP | 437 | -36.106 | 1.690  | 25.391 | 1.00136.55 | C |
| ATOM | 3438 | OD1 | ASP | 437 | -36.722 | 2.662  | 25.905 | 1.00136.55 | O |
| ATOM | 3439 | OD2 | ASP | 437 | -35.980 | 0.569  | 25.952 | 1.00136.55 | O |
| ATOM | 3440 | C   | ASP | 437 | -34.696 | 3.728  | 22.510 | 1.00136.55 | C |
| ATOM | 3441 | O   | ASP | 437 | -33.537 | 4.091  | 22.709 | 1.00136.55 | O |
| ATOM | 3442 | N   | ARG | 438 | -35.217 | 3.644  | 21.272 | 1.00200.07 | N |
| ATOM | 3443 | CA  | ARG | 438 | -34.423 | 3.960  | 20.121 | 1.00200.07 | C |
| ATOM | 3444 | CB  | ARG | 438 | -35.171 | 3.637  | 18.804 | 1.00200.07 | C |
| ATOM | 3445 | CG  | ARG | 438 | -35.580 | 2.153  | 18.721 | 1.00200.07 | C |
| ATOM | 3446 | CD  | ARG | 438 | -36.113 | 1.663  | 17.365 | 1.00200.07 | C |
| ATOM | 3447 | NE  | ARG | 438 | -36.474 | 0.221  | 17.524 | 1.00200.07 | N |
| ATOM | 3448 | CZ  | ARG | 438 | -36.670 | -0.590 | 16.441 | 1.00200.07 | C |
| ATOM | 3449 | NH1 | ARG | 438 | -36.480 | -0.118 | 15.174 | 1.00200.07 | N |
| ATOM | 3450 | NH2 | ARG | 438 | -37.062 | -1.884 | 16.626 | 1.00200.07 | N |
| ATOM | 3451 | C   | ARG | 438 | -34.023 | 5.415  | 20.190 | 1.00200.07 | C |
| ATOM | 3452 | O   | ARG | 438 | -32.875 | 5.760  | 19.913 | 1.00200.07 | O |
| ATOM | 3453 | N   | GLU | 439 | -34.963 | 6.306  | 20.586 | 1.00356.40 | N |
| ATOM | 3454 | CA  | GLU | 439 | -34.731 | 7.727  | 20.732 | 1.00356.40 | C |
| ATOM | 3455 | CB  | GLU | 439 | -35.954 | 8.463  | 21.300 | 1.00356.40 | C |
| ATOM | 3456 | CG  | GLU | 439 | -37.100 | 8.673  | 20.334 | 1.00356.40 | C |
| ATOM | 3457 | CD  | GLU | 439 | -36.617 | 9.749  | 19.389 | 1.00356.40 | C |
| ATOM | 3458 | OE1 | GLU | 439 | -35.585 | 9.507  | 18.715 | 1.00356.40 | O |
| ATOM | 3459 | OE2 | GLU | 439 | -37.258 | 10.829 | 19.330 | 1.00356.40 | O |
| ATOM | 3460 | C   | GLU | 439 | -33.734 | 7.989  | 21.815 | 1.00356.40 | C |
| ATOM | 3461 | O   | GLU | 439 | -32.838 | 8.823  | 21.688 | 1.00356.40 | O |
| ATOM | 3462 | N   | ARG | 440 | -33.907 | 7.274  | 22.933 | 1.00200.88 | N |
| ATOM | 3463 | CA  | ARG | 440 | -33.170 | 7.484  | 24.145 | 1.00200.88 | C |
| ATOM | 3464 | CB  | ARG | 440 | -33.645 | 6.477  | 25.215 | 1.00200.88 | C |
| ATOM | 3465 | CG  | ARG | 440 | -33.567 | 6.959  | 26.666 | 1.00200.88 | C |
| ATOM | 3466 | CD  | ARG | 440 | -34.158 | 5.958  | 27.662 | 1.00200.88 | C |
| ATOM | 3467 | NE  | ARG | 440 | -33.029 | 5.456  | 28.482 | 1.00200.88 | N |
| ATOM | 3468 | CZ  | ARG | 440 | -32.114 | 4.633  | 27.900 | 1.00200.88 | C |
| ATOM | 3469 | NH1 | ARG | 440 | -32.266 | 4.286  | 26.590 | 1.00200.88 | N |
| ATOM | 3470 | NH2 | ARG | 440 | -31.043 | 4.188  | 28.615 | 1.00200.88 | N |
| ATOM | 3471 | C   | ARG | 440 | -31.711 | 7.268  | 23.868 | 1.00200.88 | C |
| ATOM | 3472 | O   | ARG | 440 | -30.859 | 8.041  | 24.307 | 1.00200.88 | O |
| ATOM | 3473 | N   | GLU | 441 | -31.387 | 6.217  | 23.094 | 1.00 81.36 | N |
| ATOM | 3474 | CA  | GLU | 441 | -30.022 | 5.889  | 22.793 | 1.00 81.36 | C |
| ATOM | 3475 | CB  | GLU | 441 | -29.896 | 4.641  | 21.906 | 1.00 81.36 | C |
| ATOM | 3476 | CG  | GLU | 441 | -30.423 | 3.368  | 22.570 | 1.00 81.36 | C |
| ATOM | 3477 | CD  | GLU | 441 | -29.512 | 3.039  | 23.742 | 1.00 81.36 | C |
| ATOM | 3478 | OE1 | GLU | 441 | -28.518 | 3.785  | 23.951 | 1.00 81.36 | O |
| ATOM | 3479 | OE2 | GLU | 441 | -29.798 | 2.032  | 24.442 | 1.00 81.36 | O |
| ATOM | 3480 | C   | GLU | 441 | -29.434 | 7.027  | 22.027 | 1.00 81.36 | C |
| ATOM | 3481 | O   | GLU | 441 | -28.265 | 7.368  | 22.207 | 1.00 81.36 | O |
| ATOM | 3482 | N   | HIS | 442 | -30.237 | 7.640  | 21.137 | 1.00 79.33 | N |
| ATOM | 3483 | CA  | HIS | 442 | -29.760 | 8.714  | 20.319 | 1.00 79.33 | C |
| ATOM | 3484 | ND1 | HIS | 442 | -29.800 | 7.706  | 17.362 | 1.00 79.33 | N |
| ATOM | 3485 | CG  | HIS | 442 | -30.865 | 8.088  | 18.149 | 1.00 79.33 | C |
| ATOM | 3486 | CB  | HIS | 442 | -30.765 | 9.133  | 19.228 | 1.00 79.33 | C |
| ATOM | 3487 | NE2 | HIS | 442 | -31.544 | 6.501  | 16.693 | 1.00 79.33 | N |
| ATOM | 3488 | CD2 | HIS | 442 | -31.923 | 7.341  | 17.726 | 1.00 79.33 | C |
| ATOM | 3489 | CE1 | HIS | 442 | -30.262 | 6.755  | 16.510 | 1.00 79.33 | C |
| ATOM | 3490 | C   | HIS | 442 | -29.391 | 9.885  | 21.180 | 1.00 79.33 | C |
| ATOM | 3491 | O   | HIS | 442 | -28.377 | 10.538 | 20.938 | 1.00 79.33 | O |
| ATOM | 3492 | N   | HIS | 443 | -30.191 | 10.164 | 22.226 | 1.00133.37 | N |
| ATOM | 3493 | CA  | HIS | 443 | -29.939 | 11.269 | 23.109 | 1.00133.37 | C |
| ATOM | 3494 | ND1 | HIS | 443 | -33.011 | 11.771 | 22.568 | 1.00133.37 | N |
| ATOM | 3495 | CG  | HIS | 443 | -32.296 | 12.122 | 23.690 | 1.00133.37 | C |
| ATOM | 3496 | CB  | HIS | 443 | -31.041 | 11.443 | 24.175 | 1.00133.37 | C |
| ATOM | 3497 | NE2 | HIS | 443 | -34.096 | 13.473 | 23.500 | 1.00133.37 | N |
| ATOM | 3498 | CD2 | HIS | 443 | -32.973 | 13.162 | 24.244 | 1.00133.37 | C |
| ATOM | 3499 | CE1 | HIS | 443 | -34.077 | 12.611 | 22.503 | 1.00133.37 | C |
| ATOM | 3500 | C   | HIS | 443 | -28.628 | 11.072 | 23.824 | 1.00133.37 | C |
| ATOM | 3501 | O   | HIS | 443 | -27.884 | 12.028 | 24.036 | 1.00133.37 | O |
| ATOM | 3502 | N   | LEU | 444 | -28.298 | 9.828  | 24.220 | 1.00 76.14 | N |

|      |      |     |     |     |         |        |        |            |       |   |
|------|------|-----|-----|-----|---------|--------|--------|------------|-------|---|
| ATOM | 3503 | CA  | LEU | 444 | -27.066 | 9.586  | 24.924 | 1.00       | 76.14 | C |
| ATOM | 3504 | CB  | LEU | 444 | -26.900 | 8.122  | 25.349 | 1.00       | 76.14 | C |
| ATOM | 3505 | CG  | LEU | 444 | -27.939 | 7.724  | 26.414 | 1.00       | 76.14 | C |
| ATOM | 3506 | CD1 | LEU | 444 | -27.769 | 6.263  | 26.853 | 1.00       | 76.14 | C |
| ATOM | 3507 | CD2 | LEU | 444 | -27.926 | 8.713  | 27.590 | 1.00       | 76.14 | C |
| ATOM | 3508 | C   | LEU | 444 | -25.928 | 9.973  | 24.030 | 1.00       | 76.14 | C |
| ATOM | 3509 | O   | LEU | 444 | -24.860 | 10.385 | 24.484 | 1.00       | 76.14 | O |
| ATOM | 3510 | N   | ARG | 445 | -26.129 | 9.793  | 22.721 | 1.00183.45 |       | N |
| ATOM | 3511 | CA  | ARG | 445 | -25.184 | 10.130 | 21.697 | 1.00183.45 |       | C |
| ATOM | 3512 | CB  | ARG | 445 | -25.565 | 9.532  | 20.343 | 1.00183.45 |       | C |
| ATOM | 3513 | CG  | ARG | 445 | -25.469 | 8.022  | 20.468 | 1.00183.45 |       | C |
| ATOM | 3514 | CD  | ARG | 445 | -25.587 | 7.223  | 19.181 | 1.00183.45 |       | C |
| ATOM | 3515 | NE  | ARG | 445 | -24.935 | 5.934  | 19.523 | 1.00183.45 |       | N |
| ATOM | 3516 | CZ  | ARG | 445 | -23.585 | 5.839  | 19.358 | 1.00183.45 |       | C |
| ATOM | 3517 | NH1 | ARG | 445 | -22.925 | 6.805  | 18.652 | 1.00183.45 |       | N |
| ATOM | 3518 | NH2 | ARG | 445 | -22.893 | 4.800  | 19.910 | 1.00183.45 |       | N |
| ATOM | 3519 | C   | ARG | 445 | -25.064 | 11.614 | 21.565 | 1.00183.45 |       | C |
| ATOM | 3520 | O   | ARG | 445 | -24.058 | 12.111 | 21.061 | 1.00183.45 |       | O |
| ATOM | 3521 | N   | GLY | 446 | -26.096 | 12.367 | 21.987 | 1.00       | 43.97 | N |
| ATOM | 3522 | CA  | GLY | 446 | -26.021 | 13.785 | 21.800 | 1.00       | 43.97 | C |
| ATOM | 3523 | C   | GLY | 446 | -26.685 | 14.114 | 20.499 | 1.00       | 43.97 | C |
| ATOM | 3524 | O   | GLY | 446 | -26.300 | 15.066 | 19.821 | 1.00       | 43.97 | O |
| ATOM | 3525 | N   | GLU | 447 | -27.688 | 13.301 | 20.107 | 1.00       | 94.67 | N |
| ATOM | 3526 | CA  | GLU | 447 | -28.405 | 13.541 | 18.884 | 1.00       | 94.67 | C |
| ATOM | 3527 | CB  | GLU | 447 | -28.120 | 12.490 | 17.804 | 1.00       | 94.67 | C |
| ATOM | 3528 | CG  | GLU | 447 | -26.664 | 12.448 | 17.338 | 1.00       | 94.67 | C |
| ATOM | 3529 | CD  | GLU | 447 | -26.552 | 11.286 | 16.364 | 1.00       | 94.67 | C |
| ATOM | 3530 | OE1 | GLU | 447 | -27.522 | 11.082 | 15.586 | 1.00       | 94.67 | O |
| ATOM | 3531 | OE2 | GLU | 447 | -25.503 | 10.589 | 16.383 | 1.00       | 94.67 | O |
| ATOM | 3532 | C   | GLU | 447 | -29.879 | 13.443 | 19.179 | 1.00       | 94.67 | C |
| ATOM | 3533 | O   | GLU | 447 | -30.279 | 12.752 | 20.113 | 1.00       | 94.67 | O |
| ATOM | 3534 | N   | CYS | 448 | -30.724 | 14.157 | 18.393 | 1.00119.33 |       | N |
| ATOM | 3535 | CA  | CYS | 448 | -32.164 | 14.111 | 18.555 | 1.00119.33 |       | C |
| ATOM | 3536 | CB  | CYS | 448 | -32.757 | 15.417 | 19.112 | 1.00119.33 |       | C |
| ATOM | 3537 | SG  | CYS | 448 | -34.571 | 15.379 | 19.199 | 1.00119.33 |       | S |
| ATOM | 3538 | C   | CYS | 448 | -32.792 | 13.905 | 17.208 | 1.00119.33 |       | C |
| ATOM | 3539 | O   | CYS | 448 | -32.583 | 14.704 | 16.296 | 1.00119.33 |       | O |
| ATOM | 3540 | N   | HIS | 449 | -33.448 | 12.741 | 17.006 | 1.00459.88 |       | N |
| ATOM | 3541 | CA  | HIS | 449 | -34.151 | 12.452 | 15.787 | 1.00459.88 |       | C |
| ATOM | 3542 | ND1 | HIS | 449 | -31.807 | 9.994  | 15.920 | 1.00459.88 |       | N |
| ATOM | 3543 | CG  | HIS | 449 | -32.715 | 10.602 | 15.084 | 1.00459.88 |       | C |
| ATOM | 3544 | CB  | HIS | 449 | -34.109 | 10.962 | 15.453 | 1.00459.88 |       | C |
| ATOM | 3545 | NE2 | HIS | 449 | -30.744 | 10.405 | 14.010 | 1.00459.88 |       | N |
| ATOM | 3546 | CD2 | HIS | 449 | -32.052 | 10.844 | 13.922 | 1.00459.88 |       | C |
| ATOM | 3547 | CE1 | HIS | 449 | -30.643 | 9.901  | 15.226 | 1.00459.88 |       | C |
| ATOM | 3548 | C   | HIS | 449 | -35.594 | 12.873 | 15.730 | 1.00459.88 |       | C |
| ATOM | 3549 | O   | HIS | 449 | -36.024 | 13.544 | 14.798 | 1.00459.88 |       | O |
| ATOM | 3550 | N   | SER | 450 | -36.397 | 12.382 | 16.697 | 1.00516.59 |       | N |
| ATOM | 3551 | CA  | SER | 450 | -37.830 | 12.543 | 16.684 | 1.00516.59 |       | C |
| ATOM | 3552 | CB  | SER | 450 | -38.591 | 11.224 | 16.934 | 1.00516.59 |       | C |
| ATOM | 3553 | OG  | SER | 450 | -39.973 | 11.362 | 16.638 | 1.00516.59 |       | O |
| ATOM | 3554 | C   | SER | 450 | -38.396 | 13.564 | 17.636 | 1.00516.59 |       | C |
| ATOM | 3555 | O   | SER | 450 | -39.614 | 13.631 | 17.775 | 1.00516.59 |       | O |
| ATOM | 3556 | N   | CYS | 451 | -37.609 | 14.365 | 18.367 | 1.00272.57 |       | N |
| ATOM | 3557 | CA  | CYS | 451 | -38.301 | 15.175 | 19.334 | 1.00272.57 |       | C |
| ATOM | 3558 | CB  | CYS | 451 | -37.451 | 15.390 | 20.589 | 1.00272.57 |       | C |
| ATOM | 3559 | SG  | CYS | 451 | -36.890 | 13.780 | 21.236 | 1.00272.57 |       | S |
| ATOM | 3560 | C   | CYS | 451 | -38.660 | 16.489 | 18.726 | 1.00272.57 |       | C |
| ATOM | 3561 | O   | CYS | 451 | -37.808 | 17.348 | 18.515 | 1.00272.57 |       | O |
| ATOM | 3562 | N   | VAL | 452 | -39.970 | 16.693 | 18.472 | 1.00334.20 |       | N |
| ATOM | 3563 | CA  | VAL | 452 | -40.356 | 17.887 | 17.784 | 1.00334.20 |       | C |
| ATOM | 3564 | CB  | VAL | 452 | -40.693 | 17.609 | 16.359 | 1.00334.20 |       | C |
| ATOM | 3565 | CG1 | VAL | 452 | -40.708 | 18.927 | 15.587 | 1.00334.20 |       | C |
| ATOM | 3566 | CG2 | VAL | 452 | -39.816 | 16.470 | 15.814 | 1.00334.20 |       | C |
| ATOM | 3567 | C   | VAL | 452 | -41.634 | 18.353 | 18.420 | 1.00334.20 |       | C |
| ATOM | 3568 | O   | VAL | 452 | -42.315 | 17.589 | 19.096 | 1.00334.20 |       | O |

|      |      |     |     |     |         |        |        |            |   |
|------|------|-----|-----|-----|---------|--------|--------|------------|---|
| ATOM | 3569 | N   | TYR | 453 | -42.014 | 19.631 | 18.219 | 1.00647.76 | N |
| ATOM | 3570 | CA  | TYR | 453 | -43.207 | 20.139 | 18.848 | 1.00647.76 | C |
| ATOM | 3571 | CB  | TYR | 453 | -43.017 | 21.524 | 19.506 | 1.00647.76 | C |
| ATOM | 3572 | CG  | TYR | 453 | -41.992 | 21.462 | 20.588 | 1.00647.76 | C |
| ATOM | 3573 | CD1 | TYR | 453 | -42.342 | 21.030 | 21.841 | 1.00647.76 | C |
| ATOM | 3574 | CD2 | TYR | 453 | -40.683 | 21.844 | 20.362 | 1.00647.76 | C |
| ATOM | 3575 | CE1 | TYR | 453 | -41.397 | 20.979 | 22.847 | 1.00647.76 | C |
| ATOM | 3576 | CE2 | TYR | 453 | -39.745 | 21.791 | 21.369 | 1.00647.76 | C |
| ATOM | 3577 | CZ  | TYR | 453 | -40.101 | 21.355 | 22.615 | 1.00647.76 | C |
| ATOM | 3578 | OH  | TYR | 453 | -39.141 | 21.287 | 23.646 | 1.00647.76 | O |
| ATOM | 3579 | C   | TYR | 453 | -44.174 | 20.440 | 17.757 | 1.00647.76 | C |
| ATOM | 3580 | O   | TYR | 453 | -43.787 | 20.891 | 16.682 | 1.00647.76 | O |
| ATOM | 3581 | N   | ASN | 454 | -45.460 | 20.141 | 17.991 | 1.00526.42 | N |
| ATOM | 3582 | CA  | ASN | 454 | -46.438 | 20.685 | 17.125 | 1.00526.42 | C |
| ATOM | 3583 | CB  | ASN | 454 | -47.438 | 19.702 | 16.479 | 1.00526.42 | C |
| ATOM | 3584 | CG  | ASN | 454 | -46.809 | 18.926 | 15.304 | 1.00526.42 | C |
| ATOM | 3585 | OD1 | ASN | 454 | -47.504 | 18.195 | 14.599 | 1.00526.42 | O |
| ATOM | 3586 | ND2 | ASN | 454 | -45.479 | 19.073 | 15.066 | 1.00526.42 | N |
| ATOM | 3587 | C   | ASN | 454 | -47.096 | 21.798 | 17.895 | 1.00526.42 | C |
| ATOM | 3588 | O   | ASN | 454 | -47.236 | 21.797 | 19.119 | 1.00526.42 | O |
| ATOM | 3589 | N   | MET | 455 | -47.464 | 22.856 | 17.181 | 1.00520.75 | N |
| ATOM | 3590 | CA  | MET | 455 | -47.913 | 24.022 | 17.872 | 1.00520.75 | C |
| ATOM | 3591 | CB  | MET | 455 | -46.849 | 25.105 | 17.658 | 1.00520.75 | C |
| ATOM | 3592 | CG  | MET | 455 | -47.032 | 26.439 | 18.351 | 1.00520.75 | C |
| ATOM | 3593 | SD  | MET | 455 | -47.227 | 27.755 | 17.135 | 1.00520.75 | S |
| ATOM | 3594 | CE  | MET | 455 | -45.749 | 27.208 | 16.231 | 1.00520.75 | C |
| ATOM | 3595 | C   | MET | 455 | -49.257 | 24.348 | 17.328 | 1.00520.75 | C |
| ATOM | 3596 | O   | MET | 455 | -49.436 | 24.425 | 16.113 | 1.00520.75 | O |
| ATOM | 3597 | N   | MET | 456 | -50.247 | 24.489 | 18.238 | 1.00597.43 | N |
| ATOM | 3598 | CA  | MET | 456 | -51.592 | 24.738 | 17.802 | 1.00597.43 | C |
| ATOM | 3599 | CB  | MET | 456 | -52.450 | 23.461 | 17.791 | 1.00597.43 | C |
| ATOM | 3600 | CG  | MET | 456 | -52.808 | 22.968 | 19.197 | 1.00597.43 | C |
| ATOM | 3601 | SD  | MET | 456 | -51.394 | 22.560 | 20.278 | 1.00597.43 | S |
| ATOM | 3602 | CE  | MET | 456 | -51.252 | 20.809 | 19.824 | 1.00597.43 | C |
| ATOM | 3603 | C   | MET | 456 | -52.262 | 25.714 | 18.731 | 1.00597.43 | C |
| ATOM | 3604 | O   | MET | 456 | -51.726 | 26.101 | 19.767 | 1.00597.43 | O |
| ATOM | 3605 | N   | GLY | 457 | -53.470 | 26.172 | 18.340 | 1.00130.70 | N |
| ATOM | 3606 | CA  | GLY | 457 | -54.200 | 27.103 | 19.143 | 1.00130.70 | C |
| ATOM | 3607 | C   | GLY | 457 | -54.872 | 26.400 | 20.279 | 1.00130.70 | C |
| ATOM | 3608 | O   | GLY | 457 | -55.414 | 25.305 | 20.135 | 1.00130.70 | O |
| ATOM | 3609 | N   | LYS | 458 | -54.882 | 27.061 | 21.449 | 1.00114.83 | N |
| ATOM | 3610 | CA  | LYS | 458 | -55.540 | 26.529 | 22.600 | 1.00114.83 | C |
| ATOM | 3611 | CB  | LYS | 458 | -54.882 | 26.941 | 23.926 | 1.00114.83 | C |
| ATOM | 3612 | CG  | LYS | 458 | -55.600 | 26.357 | 25.141 | 1.00114.83 | C |
| ATOM | 3613 | CD  | LYS | 458 | -54.967 | 26.734 | 26.478 | 1.00114.83 | C |
| ATOM | 3614 | CE  | LYS | 458 | -53.604 | 26.106 | 26.713 | 1.00114.83 | C |
| ATOM | 3615 | NZ  | LYS | 458 | -53.225 | 26.245 | 28.134 | 1.00114.83 | N |
| ATOM | 3616 | C   | LYS | 458 | -56.925 | 27.092 | 22.628 | 1.00114.83 | C |
| ATOM | 3617 | O   | LYS | 458 | -57.135 | 28.291 | 22.446 | 1.00114.83 | O |
| ATOM | 3618 | N   | ARG | 459 | -57.923 | 26.224 | 22.866 | 1.00127.53 | N |
| ATOM | 3619 | CA  | ARG | 459 | -59.279 | 26.682 | 22.931 | 1.00127.53 | C |
| ATOM | 3620 | CB  | ARG | 459 | -60.307 | 25.546 | 22.814 | 1.00127.53 | C |
| ATOM | 3621 | CG  | ARG | 459 | -60.309 | 24.848 | 21.458 | 1.00127.53 | C |
| ATOM | 3622 | CD  | ARG | 459 | -61.173 | 25.570 | 20.428 | 1.00127.53 | C |
| ATOM | 3623 | NE  | ARG | 459 | -62.569 | 25.589 | 20.945 | 1.00127.53 | N |
| ATOM | 3624 | CZ  | ARG | 459 | -63.463 | 26.479 | 20.427 | 1.00127.53 | C |
| ATOM | 3625 | NH1 | ARG | 459 | -63.066 | 27.353 | 19.456 | 1.00127.53 | N |
| ATOM | 3626 | NH2 | ARG | 459 | -64.752 | 26.497 | 20.874 | 1.00127.53 | N |
| ATOM | 3627 | C   | ARG | 459 | -59.484 | 27.271 | 24.292 | 1.00127.53 | C |
| ATOM | 3628 | O   | ARG | 459 | -59.344 | 26.579 | 25.302 | 1.00127.53 | O |
| ATOM | 3629 | N   | GLU | 460 | -59.832 | 28.573 | 24.356 | 1.00 82.98 | N |
| ATOM | 3630 | CA  | GLU | 460 | -60.004 | 29.191 | 25.637 | 1.00 82.98 | C |
| ATOM | 3631 | CB  | GLU | 460 | -58.744 | 29.949 | 26.095 | 1.00 82.98 | C |
| ATOM | 3632 | CG  | GLU | 460 | -57.567 | 28.990 | 26.307 | 1.00 82.98 | C |
| ATOM | 3633 | CD  | GLU | 460 | -56.383 | 29.732 | 26.910 | 1.00 82.98 | C |
| ATOM | 3634 | OE1 | GLU | 460 | -55.909 | 30.719 | 26.287 | 1.00 82.98 | O |

|      |      |     |     |     |         |        |        |      |        |   |
|------|------|-----|-----|-----|---------|--------|--------|------|--------|---|
| ATOM | 3635 | OE2 | GLU | 460 | -55.934 | 29.307 | 28.007 | 1.00 | 82.98  | O |
| ATOM | 3636 | C   | GLU | 460 | -61.169 | 30.136 | 25.592 | 1.00 | 82.98  | C |
| ATOM | 3637 | O   | GLU | 460 | -61.557 | 30.623 | 24.530 | 1.00 | 82.98  | O |
| ATOM | 3638 | N   | LYS | 461 | -61.784 | 30.387 | 26.769 | 1.00 | 75.48  | N |
| ATOM | 3639 | CA  | LYS | 461 | -62.904 | 31.284 | 26.850 | 1.00 | 75.48  | C |
| ATOM | 3640 | CB  | LYS | 461 | -63.948 | 30.834 | 27.885 | 1.00 | 75.48  | C |
| ATOM | 3641 | CG  | LYS | 461 | -64.654 | 29.555 | 27.435 | 1.00 | 75.48  | C |
| ATOM | 3642 | CD  | LYS | 461 | -65.431 | 28.812 | 28.521 | 1.00 | 75.48  | C |
| ATOM | 3643 | CE  | LYS | 461 | -66.212 | 27.625 | 27.952 | 1.00 | 75.48  | C |
| ATOM | 3644 | NZ  | LYS | 461 | -66.888 | 26.876 | 29.032 | 1.00 | 75.48  | N |
| ATOM | 3645 | C   | LYS | 461 | -62.372 | 32.624 | 27.261 | 1.00 | 75.48  | C |
| ATOM | 3646 | O   | LYS | 461 | -61.874 | 32.790 | 28.374 | 1.00 | 75.48  | O |
| ATOM | 3647 | N   | LYS | 462 | -62.464 | 33.626 | 26.357 | 1.00 | 106.21 | N |
| ATOM | 3648 | CA  | LYS | 462 | -61.943 | 34.919 | 26.704 | 1.00 | 106.21 | C |
| ATOM | 3649 | CB  | LYS | 462 | -60.488 | 35.166 | 26.273 | 1.00 | 106.21 | C |
| ATOM | 3650 | CG  | LYS | 462 | -59.522 | 34.418 | 27.194 | 1.00 | 106.21 | C |
| ATOM | 3651 | CD  | LYS | 462 | -58.064 | 34.417 | 26.750 | 1.00 | 106.21 | C |
| ATOM | 3652 | CE  | LYS | 462 | -57.172 | 33.634 | 27.713 | 1.00 | 106.21 | C |
| ATOM | 3653 | NZ  | LYS | 462 | -57.673 | 32.245 | 27.831 | 1.00 | 106.21 | N |
| ATOM | 3654 | C   | LYS | 462 | -62.812 | 36.015 | 26.176 | 1.00 | 106.21 | C |
| ATOM | 3655 | O   | LYS | 462 | -63.806 | 35.772 | 25.494 | 1.00 | 106.21 | O |
| ATOM | 3656 | N   | GLN | 463 | -62.462 | 37.273 | 26.526 | 1.00 | 91.18  | N |
| ATOM | 3657 | CA  | GLN | 463 | -63.220 | 38.411 | 26.092 | 1.00 | 91.18  | C |
| ATOM | 3658 | CB  | GLN | 463 | -62.768 | 39.738 | 26.737 | 1.00 | 91.18  | C |
| ATOM | 3659 | CG  | GLN | 463 | -61.339 | 40.170 | 26.397 | 1.00 | 91.18  | C |
| ATOM | 3660 | CD  | GLN | 463 | -61.072 | 41.488 | 27.117 | 1.00 | 91.18  | C |
| ATOM | 3661 | OE1 | GLN | 463 | -61.997 | 42.207 | 27.490 | 1.00 | 91.18  | O |
| ATOM | 3662 | NE2 | GLN | 463 | -59.767 | 41.815 | 27.327 | 1.00 | 91.18  | N |
| ATOM | 3663 | C   | GLN | 463 | -63.080 | 38.497 | 24.602 | 1.00 | 91.18  | C |
| ATOM | 3664 | O   | GLN | 463 | -62.087 | 38.043 | 24.035 | 1.00 | 91.18  | O |
| ATOM | 3665 | N   | GLY | 464 | -64.090 | 39.084 | 23.928 | 1.00 | 40.11  | N |
| ATOM | 3666 | CA  | GLY | 464 | -64.129 | 39.114 | 22.491 | 1.00 | 40.11  | C |
| ATOM | 3667 | C   | GLY | 464 | -63.221 | 40.180 | 21.948 | 1.00 | 40.11  | C |
| ATOM | 3668 | O   | GLY | 464 | -62.488 | 40.837 | 22.686 | 1.00 | 40.11  | O |
| ATOM | 3669 | N   | GLU | 465 | -63.215 | 40.330 | 20.604 | 1.00 | 76.80  | N |
| ATOM | 3670 | CA  | GLU | 465 | -62.424 | 41.341 | 19.962 | 1.00 | 76.80  | C |
| ATOM | 3671 | CB  | GLU | 465 | -60.974 | 40.895 | 19.685 | 1.00 | 76.80  | C |
| ATOM | 3672 | CG  | GLU | 465 | -60.023 | 42.046 | 19.345 | 1.00 | 76.80  | C |
| ATOM | 3673 | CD  | GLU | 465 | -58.618 | 41.481 | 19.158 | 1.00 | 76.80  | C |
| ATOM | 3674 | OE1 | GLU | 465 | -58.416 | 40.711 | 18.180 | 1.00 | 76.80  | O |
| ATOM | 3675 | OE2 | GLU | 465 | -57.731 | 41.809 | 19.990 | 1.00 | 76.80  | O |
| ATOM | 3676 | C   | GLU | 465 | -63.092 | 41.656 | 18.656 | 1.00 | 76.80  | C |
| ATOM | 3677 | O   | GLU | 465 | -63.452 | 40.760 | 17.893 | 1.00 | 76.80  | O |
| ATOM | 3678 | N   | PHE | 466 | -63.276 | 42.957 | 18.372 | 1.00 | 93.33  | N |
| ATOM | 3679 | CA  | PHE | 466 | -63.923 | 43.418 | 17.173 | 1.00 | 93.33  | C |
| ATOM | 3680 | CB  | PHE | 466 | -63.213 | 43.034 | 15.866 | 1.00 | 93.33  | C |
| ATOM | 3681 | CG  | PHE | 466 | -61.842 | 43.597 | 15.909 | 1.00 | 93.33  | C |
| ATOM | 3682 | CD1 | PHE | 466 | -61.647 | 44.953 | 16.008 | 1.00 | 93.33  | C |
| ATOM | 3683 | CD2 | PHE | 466 | -60.755 | 42.760 | 15.816 | 1.00 | 93.33  | C |
| ATOM | 3684 | CE1 | PHE | 466 | -60.373 | 45.465 | 16.041 | 1.00 | 93.33  | C |
| ATOM | 3685 | CE2 | PHE | 466 | -59.480 | 43.268 | 15.847 | 1.00 | 93.33  | C |
| ATOM | 3686 | CZ  | PHE | 466 | -59.290 | 44.623 | 15.964 | 1.00 | 93.33  | C |
| ATOM | 3687 | C   | PHE | 466 | -65.288 | 42.804 | 17.094 | 1.00 | 93.33  | C |
| ATOM | 3688 | O   | PHE | 466 | -65.775 | 42.509 | 16.005 | 1.00 | 93.33  | O |
| ATOM | 3689 | N   | GLY | 467 | -65.943 | 42.574 | 18.247 | 1.00 | 53.38  | N |
| ATOM | 3690 | CA  | GLY | 467 | -67.277 | 42.041 | 18.230 | 1.00 | 53.38  | C |
| ATOM | 3691 | C   | GLY | 467 | -67.269 | 40.581 | 17.861 | 1.00 | 53.38  | C |
| ATOM | 3692 | O   | GLY | 467 | -68.327 | 40.014 | 17.584 | 1.00 | 53.38  | O |
| ATOM | 3693 | N   | LYS | 468 | -66.092 | 39.922 | 17.835 | 1.00 | 999.99 | N |
| ATOM | 3694 | CA  | LYS | 468 | -66.074 | 38.519 | 17.506 | 1.00 | 999.99 | C |
| ATOM | 3695 | CB  | LYS | 468 | -65.637 | 38.145 | 16.080 | 1.00 | 999.99 | C |
| ATOM | 3696 | CG  | LYS | 468 | -66.667 | 38.396 | 14.981 | 1.00 | 999.99 | C |
| ATOM | 3697 | CD  | LYS | 468 | -66.130 | 37.993 | 13.605 | 1.00 | 999.99 | C |
| ATOM | 3698 | CE  | LYS | 468 | -66.997 | 38.434 | 12.429 | 1.00 | 999.99 | C |
| ATOM | 3699 | NZ  | LYS | 468 | -66.409 | 39.646 | 11.816 | 1.00 | 999.99 | N |
| ATOM | 3700 | C   | LYS | 468 | -65.108 | 37.811 | 18.401 | 1.00 | 999.99 | C |



|      |      |     |     |     |         |        |        |            |   |
|------|------|-----|-----|-----|---------|--------|--------|------------|---|
| ATOM | 3701 | O   | LYS | 468 | -64.773 | 38.279 | 19.488 | 1.00999.99 | O |
| ATOM | 3702 | N   | ALA | 469 | -64.667 | 36.614 | 17.959 | 1.00287.28 | N |
| ATOM | 3703 | CA  | ALA | 469 | -63.776 | 35.800 | 18.735 | 1.00287.28 | C |
| ATOM | 3704 | CB  | ALA | 469 | -63.779 | 34.323 | 18.310 | 1.00287.28 | C |
| ATOM | 3705 | C   | ALA | 469 | -62.374 | 36.300 | 18.608 | 1.00287.28 | C |
| ATOM | 3706 | O   | ALA | 469 | -61.971 | 36.827 | 17.574 | 1.00287.28 | O |
| ATOM | 3707 | N   | LYS | 470 | -61.585 | 36.126 | 19.683 | 1.00464.06 | N |
| ATOM | 3708 | CA  | LYS | 470 | -60.219 | 36.546 | 19.675 | 1.00464.06 | C |
| ATOM | 3709 | CB  | LYS | 470 | -59.780 | 36.958 | 21.096 | 1.00464.06 | C |
| ATOM | 3710 | CG  | LYS | 470 | -58.707 | 38.047 | 21.149 | 1.00464.06 | C |
| ATOM | 3711 | CD  | LYS | 470 | -58.798 | 38.908 | 22.417 | 1.00464.06 | C |
| ATOM | 3712 | CE  | LYS | 470 | -57.924 | 38.462 | 23.589 | 1.00464.06 | C |
| ATOM | 3713 | NZ  | LYS | 470 | -58.145 | 39.361 | 24.748 | 1.00464.06 | N |
| ATOM | 3714 | C   | LYS | 470 | -59.423 | 35.400 | 19.115 | 1.00464.06 | C |
| ATOM | 3715 | O   | LYS | 470 | -59.928 | 34.281 | 19.028 | 1.00464.06 | O |
| ATOM | 3716 | N   | GLY | 471 | -58.175 | 35.659 | 18.659 | 1.00546.38 | N |
| ATOM | 3717 | CA  | GLY | 471 | -57.353 | 34.615 | 18.103 | 1.00546.38 | C |
| ATOM | 3718 | C   | GLY | 471 | -56.864 | 33.796 | 19.252 | 1.00546.38 | C |
| ATOM | 3719 | O   | GLY | 471 | -57.072 | 34.157 | 20.408 | 1.00546.38 | O |
| ATOM | 3720 | N   | SER | 472 | -56.151 | 32.690 | 18.959 | 1.00999.99 | N |
| ATOM | 3721 | CA  | SER | 472 | -55.828 | 31.741 | 19.989 | 1.00999.99 | C |
| ATOM | 3722 | CB  | SER | 472 | -56.042 | 30.301 | 19.485 | 1.00999.99 | C |
| ATOM | 3723 | OG  | SER | 472 | -55.784 | 29.367 | 20.514 | 1.00999.99 | O |
| ATOM | 3724 | C   | SER | 472 | -54.394 | 31.857 | 20.425 | 1.00999.99 | C |
| ATOM | 3725 | O   | SER | 472 | -53.528 | 32.261 | 19.652 | 1.00999.99 | O |
| ATOM | 3726 | N   | ARG | 473 | -54.137 | 31.524 | 21.715 | 1.00999.99 | N |
| ATOM | 3727 | CA  | ARG | 473 | -52.812 | 31.469 | 22.272 | 1.00999.99 | C |
| ATOM | 3728 | CB  | ARG | 473 | -52.735 | 31.387 | 23.821 | 1.00999.99 | C |
| ATOM | 3729 | CG  | ARG | 473 | -51.304 | 31.528 | 24.382 | 1.00999.99 | C |
| ATOM | 3730 | CD  | ARG | 473 | -51.034 | 30.941 | 25.781 | 1.00999.99 | C |
| ATOM | 3731 | NE  | ARG | 473 | -52.060 | 31.428 | 26.751 | 1.00999.99 | N |
| ATOM | 3732 | CZ  | ARG | 473 | -51.824 | 32.401 | 27.688 | 1.00999.99 | C |
| ATOM | 3733 | NH1 | ARG | 473 | -50.653 | 33.104 | 27.743 | 1.00999.99 | N |
| ATOM | 3734 | NH2 | ARG | 473 | -52.802 | 32.685 | 28.598 | 1.00999.99 | N |
| ATOM | 3735 | C   | ARG | 473 | -52.221 | 30.190 | 21.779 | 1.00999.99 | C |
| ATOM | 3736 | O   | ARG | 473 | -52.908 | 29.175 | 21.663 | 1.00999.99 | O |
| ATOM | 3737 | N   | ALA | 474 | -50.910 | 30.197 | 21.494 | 1.00999.99 | N |
| ATOM | 3738 | CA  | ALA | 474 | -50.335 | 29.025 | 20.924 | 1.00999.99 | C |
| ATOM | 3739 | CB  | ALA | 474 | -49.194 | 29.340 | 19.938 | 1.00999.99 | C |
| ATOM | 3740 | C   | ALA | 474 | -49.786 | 28.150 | 22.003 | 1.00999.99 | C |
| ATOM | 3741 | O   | ALA | 474 | -49.095 | 28.602 | 22.915 | 1.00999.99 | O |
| ATOM | 3742 | N   | ILE | 475 | -50.125 | 26.850 | 21.939 | 1.00999.99 | N |
| ATOM | 3743 | CA  | ILE | 475 | -49.534 | 25.932 | 22.864 | 1.00999.99 | C |
| ATOM | 3744 | CB  | ILE | 475 | -50.490 | 25.335 | 23.873 | 1.00999.99 | C |
| ATOM | 3745 | CG1 | ILE | 475 | -49.760 | 24.392 | 24.834 | 1.00999.99 | C |
| ATOM | 3746 | CG2 | ILE | 475 | -51.643 | 24.639 | 23.143 | 1.00999.99 | C |
| ATOM | 3747 | CD1 | ILE | 475 | -49.390 | 23.036 | 24.230 | 1.00999.99 | C |
| ATOM | 3748 | C   | ILE | 475 | -48.837 | 24.886 | 22.041 | 1.00999.99 | C |
| ATOM | 3749 | O   | ILE | 475 | -49.316 | 24.475 | 20.983 | 1.00999.99 | O |
| ATOM | 3750 | N   | TRP | 476 | -47.635 | 24.460 | 22.490 | 1.00999.99 | N |
| ATOM | 3751 | CA  | TRP | 476 | -46.894 | 23.505 | 21.710 | 1.00999.99 | C |
| ATOM | 3752 | CB  | TRP | 476 | -45.911 | 24.141 | 20.722 | 1.00999.99 | C |
| ATOM | 3753 | CG  | TRP | 476 | -45.277 | 25.414 | 21.201 | 1.00999.99 | C |
| ATOM | 3754 | CD2 | TRP | 476 | -43.892 | 25.702 | 21.014 | 1.00999.99 | C |
| ATOM | 3755 | CD1 | TRP | 476 | -45.815 | 26.496 | 21.834 | 1.00999.99 | C |
| ATOM | 3756 | NE1 | TRP | 476 | -44.850 | 27.448 | 22.033 | 1.00999.99 | N |
| ATOM | 3757 | CE2 | TRP | 476 | -43.660 | 26.971 | 21.536 | 1.00999.99 | C |
| ATOM | 3758 | CE3 | TRP | 476 | -42.906 | 24.964 | 20.440 | 1.00999.99 | C |
| ATOM | 3759 | CZ2 | TRP | 476 | -42.419 | 27.531 | 21.494 | 1.00999.99 | C |
| ATOM | 3760 | CZ3 | TRP | 476 | -41.654 | 25.532 | 20.411 | 1.00999.99 | C |
| ATOM | 3761 | CH2 | TRP | 476 | -41.414 | 26.788 | 20.924 | 1.00999.99 | C |
| ATOM | 3762 | C   | TRP | 476 | -46.271 | 22.380 | 22.498 | 1.00999.99 | C |
| ATOM | 3763 | O   | TRP | 476 | -45.792 | 22.595 | 23.614 | 1.00999.99 | O |
| ATOM | 3764 | N   | TYR | 477 | -46.329 | 21.156 | 21.868 | 1.00999.99 | N |
| ATOM | 3765 | CA  | TYR | 477 | -45.990 | 19.800 | 22.342 | 1.00999.99 | C |
| ATOM | 3766 | CB  | TYR | 477 | -46.622 | 19.744 | 23.720 | 1.00999.99 | C |

|      |      |     |     |     |         |        |        |            |   |
|------|------|-----|-----|-----|---------|--------|--------|------------|---|
| ATOM | 3767 | CG  | TYR | 477 | -47.212 | 18.509 | 24.167 | 1.00999.99 | C |
| ATOM | 3768 | CD1 | TYR | 477 | -46.500 | 17.545 | 24.814 | 1.00999.99 | C |
| ATOM | 3769 | CD2 | TYR | 477 | -48.556 | 18.404 | 23.946 | 1.00999.99 | C |
| ATOM | 3770 | CE1 | TYR | 477 | -47.175 | 16.431 | 25.219 | 1.00999.99 | C |
| ATOM | 3771 | CE2 | TYR | 477 | -49.234 | 17.301 | 24.349 | 1.00999.99 | C |
| ATOM | 3772 | CZ  | TYR | 477 | -48.526 | 16.320 | 24.988 | 1.00999.99 | C |
| ATOM | 3773 | OH  | TYR | 477 | -49.202 | 15.164 | 25.411 | 1.00999.99 | O |
| ATOM | 3774 | C   | TYR | 477 | -46.293 | 18.620 | 21.160 | 1.00999.99 | C |
| ATOM | 3775 | O   | TYR | 477 | -45.625 | 18.841 | 20.180 | 1.00999.99 | O |
| ATOM | 3776 | N   | MET | 478 | -47.042 | 17.345 | 21.147 | 1.00999.99 | N |
| ATOM | 3777 | CA  | MET | 478 | -47.612 | 16.266 | 20.029 | 1.00999.99 | C |
| ATOM | 3778 | CB  | MET | 478 | -47.559 | 16.697 | 18.556 | 1.00999.99 | C |
| ATOM | 3779 | CG  | MET | 478 | -48.964 | 16.559 | 17.917 | 1.00999.99 | C |
| ATOM | 3780 | SD  | MET | 478 | -49.762 | 18.180 | 17.729 | 1.00999.99 | S |
| ATOM | 3781 | CE  | MET | 478 | -50.807 | 17.908 | 16.271 | 1.00999.99 | C |
| ATOM | 3782 | C   | MET | 478 | -47.800 | 14.485 | 19.846 | 1.00999.99 | C |
| ATOM | 3783 | O   | MET | 478 | -48.732 | 14.000 | 19.267 | 1.00999.99 | O |
| ATOM | 3784 | N   | TRP | 479 | -46.864 | 13.488 | 20.292 | 1.00999.99 | N |
| ATOM | 3785 | CA  | TRP | 479 | -45.935 | 12.381 | 20.723 | 1.00999.99 | C |
| ATOM | 3786 | CB  | TRP | 479 | -45.202 | 11.877 | 19.481 | 1.00999.99 | C |
| ATOM | 3787 | CG  | TRP | 479 | -43.962 | 11.012 | 19.516 | 1.00999.99 | C |
| ATOM | 3788 | CD2 | TRP | 479 | -43.933 | 9.621  | 19.825 | 1.00999.99 | C |
| ATOM | 3789 | CD1 | TRP | 479 | -42.687 | 11.397 | 19.279 | 1.00999.99 | C |
| ATOM | 3790 | NE1 | TRP | 479 | -41.842 | 10.333 | 19.409 | 1.00999.99 | N |
| ATOM | 3791 | CE2 | TRP | 479 | -42.580 | 9.238  | 19.752 | 1.00999.99 | C |
| ATOM | 3792 | CE3 | TRP | 479 | -44.886 | 8.712  | 20.107 | 1.00999.99 | C |
| ATOM | 3793 | CZ2 | TRP | 479 | -42.199 | 7.944  | 19.966 | 1.00999.99 | C |
| ATOM | 3794 | CZ3 | TRP | 479 | -44.507 | 7.423  | 20.360 | 1.00999.99 | C |
| ATOM | 3795 | CH2 | TRP | 479 | -43.187 | 7.033  | 20.285 | 1.00999.99 | C |
| ATOM | 3796 | C   | TRP | 479 | -45.161 | 12.328 | 22.112 | 1.00999.99 | C |
| ATOM | 3797 | O   | TRP | 479 | -44.258 | 13.061 | 22.578 | 1.00999.99 | O |
| ATOM | 3798 | N   | LEU | 480 | -45.539 | 11.236 | 22.816 | 1.00954.53 | N |
| ATOM | 3799 | CA  | LEU | 480 | -45.438 | 10.918 | 24.211 | 1.00954.53 | C |
| ATOM | 3800 | CB  | LEU | 480 | -46.128 | 9.625  | 24.737 | 1.00954.53 | C |
| ATOM | 3801 | CG  | LEU | 480 | -47.051 | 8.740  | 23.869 | 1.00954.53 | C |
| ATOM | 3802 | CD1 | LEU | 480 | -47.875 | 7.784  | 24.755 | 1.00954.53 | C |
| ATOM | 3803 | CD2 | LEU | 480 | -47.910 | 9.505  | 22.887 | 1.00954.53 | C |
| ATOM | 3804 | C   | LEU | 480 | -44.048 | 10.573 | 24.501 | 1.00954.53 | C |
| ATOM | 3805 | O   | LEU | 480 | -43.587 | 10.706 | 25.632 | 1.00954.53 | O |
| ATOM | 3806 | N   | GLY | 481 | -43.406 | 9.988  | 23.480 | 1.00565.29 | N |
| ATOM | 3807 | CA  | GLY | 481 | -42.076 | 9.511  | 23.643 | 1.00565.29 | C |
| ATOM | 3808 | C   | GLY | 481 | -41.183 | 10.651 | 24.023 | 1.00565.29 | C |
| ATOM | 3809 | O   | GLY | 481 | -40.383 | 10.517 | 24.941 | 1.00565.29 | O |
| ATOM | 3810 | N   | ALA | 482 | -41.294 | 11.809 | 23.348 | 1.00323.70 | N |
| ATOM | 3811 | CA  | ALA | 482 | -40.472 | 12.952 | 23.644 | 1.00323.70 | C |
| ATOM | 3812 | CB  | ALA | 482 | -40.783 | 14.141 | 22.713 | 1.00323.70 | C |
| ATOM | 3813 | C   | ALA | 482 | -40.760 | 13.387 | 25.049 | 1.00323.70 | C |
| ATOM | 3814 | O   | ALA | 482 | -39.849 | 13.765 | 25.778 | 1.00323.70 | O |
| ATOM | 3815 | N   | ARG | 483 | -42.043 | 13.368 | 25.463 | 1.00602.49 | N |
| ATOM | 3816 | CA  | ARG | 483 | -42.392 | 13.777 | 26.799 | 1.00602.49 | C |
| ATOM | 3817 | CB  | ARG | 483 | -43.887 | 13.921 | 27.101 | 1.00602.49 | C |
| ATOM | 3818 | CG  | ARG | 483 | -44.294 | 15.381 | 27.015 | 1.00602.49 | C |
| ATOM | 3819 | CD  | ARG | 483 | -43.108 | 16.248 | 26.635 | 1.00602.49 | C |
| ATOM | 3820 | NE  | ARG | 483 | -43.044 | 16.213 | 25.152 | 1.00602.49 | N |
| ATOM | 3821 | CZ  | ARG | 483 | -43.265 | 17.380 | 24.484 | 1.00602.49 | C |
| ATOM | 3822 | NH1 | ARG | 483 | -43.551 | 18.502 | 25.201 | 1.00602.49 | N |
| ATOM | 3823 | NH2 | ARG | 483 | -43.160 | 17.462 | 23.129 | 1.00602.49 | N |
| ATOM | 3824 | C   | ARG | 483 | -41.861 | 12.844 | 27.829 | 1.00602.49 | C |
| ATOM | 3825 | O   | ARG | 483 | -41.479 | 13.270 | 28.911 | 1.00602.49 | O |
| ATOM | 3826 | N   | PHE | 484 | -41.860 | 11.535 | 27.532 | 1.00214.98 | N |
| ATOM | 3827 | CA  | PHE | 484 | -41.374 | 10.551 | 28.451 | 1.00214.98 | C |
| ATOM | 3828 | CB  | PHE | 484 | -41.438 | 9.149  | 27.815 | 1.00214.98 | C |
| ATOM | 3829 | CG  | PHE | 484 | -40.732 | 8.214  | 28.715 | 1.00214.98 | C |
| ATOM | 3830 | CD1 | PHE | 484 | -41.362 | 7.735  | 29.836 | 1.00214.98 | C |
| ATOM | 3831 | CD2 | PHE | 484 | -39.442 | 7.819  | 28.437 | 1.00214.98 | C |
| ATOM | 3832 | CE1 | PHE | 484 | -40.708 | 6.871  | 30.675 | 1.00214.98 | C |

|      |      |     |     |     |         |        |        |            |   |
|------|------|-----|-----|-----|---------|--------|--------|------------|---|
| ATOM | 3833 | CE2 | PHE | 484 | -38.781 | 6.952  | 29.272 | 1.00214.98 | C |
| ATOM | 3834 | CZ  | PHE | 484 | -39.422 | 6.480  | 30.391 | 1.00214.98 | C |
| ATOM | 3835 | C   | PHE | 484 | -39.943 | 10.862 | 28.701 | 1.00214.98 | C |
| ATOM | 3836 | O   | PHE | 484 | -39.500 | 10.852 | 29.847 | 1.00214.98 | O |
| ATOM | 3837 | N   | LEU | 485 | -39.185 | 11.162 | 27.631 | 1.00135.37 | N |
| ATOM | 3838 | CA  | LEU | 485 | -37.787 | 11.443 | 27.797 | 1.00135.37 | C |
| ATOM | 3839 | CB  | LEU | 485 | -37.014 | 11.637 | 26.477 | 1.00135.37 | C |
| ATOM | 3840 | CG  | LEU | 485 | -36.364 | 10.349 | 25.946 | 1.00135.37 | C |
| ATOM | 3841 | CD1 | LEU | 485 | -35.827 | 10.542 | 24.519 | 1.00135.37 | C |
| ATOM | 3842 | CD2 | LEU | 485 | -35.242 | 9.892  | 26.898 | 1.00135.37 | C |
| ATOM | 3843 | C   | LEU | 485 | -37.563 | 12.657 | 28.642 | 1.00135.37 | C |
| ATOM | 3844 | O   | LEU | 485 | -36.637 | 12.674 | 29.457 | 1.00135.37 | O |
| ATOM | 3845 | N   | GLU | 486 | -38.384 | 13.705 | 28.457 | 1.00230.20 | N |
| ATOM | 3846 | CA  | GLU | 486 | -38.261 | 14.922 | 29.212 | 1.00230.20 | C |
| ATOM | 3847 | CB  | GLU | 486 | -39.346 | 15.925 | 28.773 | 1.00230.20 | C |
| ATOM | 3848 | CG  | GLU | 486 | -39.209 | 17.347 | 29.314 | 1.00230.20 | C |
| ATOM | 3849 | CD  | GLU | 486 | -38.894 | 18.281 | 28.155 | 1.00230.20 | C |
| ATOM | 3850 | OE1 | GLU | 486 | -37.943 | 17.985 | 27.386 | 1.00230.20 | O |
| ATOM | 3851 | OE2 | GLU | 486 | -39.601 | 19.316 | 28.031 | 1.00230.20 | O |
| ATOM | 3852 | C   | GLU | 486 | -38.513 | 14.586 | 30.649 | 1.00230.20 | C |
| ATOM | 3853 | O   | GLU | 486 | -37.783 | 14.962 | 31.567 | 1.00230.20 | O |
| ATOM | 3854 | N   | PHE | 487 | -39.566 | 13.786 | 30.836 | 1.00171.67 | N |
| ATOM | 3855 | CA  | PHE | 487 | -40.123 | 13.338 | 32.074 | 1.00171.67 | C |
| ATOM | 3856 | CB  | PHE | 487 | -41.195 | 12.313 | 31.676 | 1.00171.67 | C |
| ATOM | 3857 | CG  | PHE | 487 | -42.125 | 12.068 | 32.778 | 1.00171.67 | C |
| ATOM | 3858 | CD1 | PHE | 487 | -43.167 | 12.938 | 32.921 | 1.00171.67 | C |
| ATOM | 3859 | CD2 | PHE | 487 | -41.977 | 11.015 | 33.650 | 1.00171.67 | C |
| ATOM | 3860 | CE1 | PHE | 487 | -44.067 | 12.758 | 33.933 | 1.00171.67 | C |
| ATOM | 3861 | CE2 | PHE | 487 | -42.883 | 10.834 | 34.665 | 1.00171.67 | C |
| ATOM | 3862 | CZ  | PHE | 487 | -43.928 | 11.710 | 34.806 | 1.00171.67 | C |
| ATOM | 3863 | C   | PHE | 487 | -39.072 | 12.605 | 32.838 | 1.00171.67 | C |
| ATOM | 3864 | O   | PHE | 487 | -38.853 | 12.865 | 34.022 | 1.00171.67 | O |
| ATOM | 3865 | N   | GLU | 488 | -38.387 | 11.646 | 32.189 | 1.00155.02 | N |
| ATOM | 3866 | CA  | GLU | 488 | -37.468 | 10.918 | 33.000 | 1.00155.02 | C |
| ATOM | 3867 | CB  | GLU | 488 | -36.933 | 9.579  | 32.453 | 1.00155.02 | C |
| ATOM | 3868 | CG  | GLU | 488 | -35.896 | 9.637  | 31.337 | 1.00155.02 | C |
| ATOM | 3869 | CD  | GLU | 488 | -35.067 | 8.362  | 31.468 | 1.00155.02 | C |
| ATOM | 3870 | OE1 | GLU | 488 | -35.115 | 7.740  | 32.560 | 1.00155.02 | O |
| ATOM | 3871 | OE2 | GLU | 488 | -34.362 | 7.994  | 30.495 | 1.00155.02 | O |
| ATOM | 3872 | C   | GLU | 488 | -36.320 | 11.786 | 33.419 | 1.00155.02 | C |
| ATOM | 3873 | O   | GLU | 488 | -35.826 | 11.653 | 34.535 | 1.00155.02 | O |
| ATOM | 3874 | N   | ALA | 489 | -35.803 | 12.655 | 32.531 | 1.00 88.26 | N |
| ATOM | 3875 | CA  | ALA | 489 | -34.676 | 13.439 | 32.947 | 1.00 88.26 | C |
| ATOM | 3876 | CB  | ALA | 489 | -33.982 | 14.139 | 31.763 | 1.00 88.26 | C |
| ATOM | 3877 | C   | ALA | 489 | -35.009 | 14.507 | 33.960 | 1.00 88.26 | C |
| ATOM | 3878 | O   | ALA | 489 | -34.371 | 14.579 | 35.007 | 1.00 88.26 | O |
| ATOM | 3879 | N   | LEU | 490 | -35.961 | 15.411 | 33.632 | 1.00162.20 | N |
| ATOM | 3880 | CA  | LEU | 490 | -36.367 | 16.546 | 34.435 | 1.00162.20 | C |
| ATOM | 3881 | CB  | LEU | 490 | -36.441 | 17.883 | 33.664 | 1.00162.20 | C |
| ATOM | 3882 | CG  | LEU | 490 | -35.022 | 18.406 | 33.297 | 1.00162.20 | C |
| ATOM | 3883 | CD1 | LEU | 490 | -35.050 | 19.795 | 32.642 | 1.00162.20 | C |
| ATOM | 3884 | CD2 | LEU | 490 | -34.080 | 18.372 | 34.513 | 1.00162.20 | C |
| ATOM | 3885 | C   | LEU | 490 | -37.525 | 16.377 | 35.383 | 1.00162.20 | C |
| ATOM | 3886 | O   | LEU | 490 | -37.785 | 17.267 | 36.191 | 1.00162.20 | O |
| ATOM | 3887 | N   | GLY | 491 | -38.292 | 15.281 | 35.277 | 1.00 86.13 | N |
| ATOM | 3888 | CA  | GLY | 491 | -39.530 | 15.056 | 35.982 | 1.00 86.13 | C |
| ATOM | 3889 | C   | GLY | 491 | -39.399 | 15.129 | 37.478 | 1.00 86.13 | C |
| ATOM | 3890 | O   | GLY | 491 | -40.391 | 15.357 | 38.166 | 1.00 86.13 | O |
| ATOM | 3891 | N   | PHE | 492 | -38.203 | 14.890 | 38.039 | 1.00104.71 | N |
| ATOM | 3892 | CA  | PHE | 492 | -38.060 | 14.851 | 39.467 | 1.00104.71 | C |
| ATOM | 3893 | CB  | PHE | 492 | -36.666 | 14.418 | 39.959 | 1.00104.71 | C |
| ATOM | 3894 | CG  | PHE | 492 | -35.612 | 15.371 | 39.526 | 1.00104.71 | C |
| ATOM | 3895 | CD1 | PHE | 492 | -35.294 | 16.460 | 40.301 | 1.00104.71 | C |
| ATOM | 3896 | CD2 | PHE | 492 | -34.930 | 15.166 | 38.351 | 1.00104.71 | C |
| ATOM | 3897 | CE1 | PHE | 492 | -34.313 | 17.337 | 39.905 | 1.00104.71 | C |
| ATOM | 3898 | CE2 | PHE | 492 | -33.949 | 16.040 | 37.952 | 1.00104.71 | C |

|      |      |     |     |     |         |        |        |            |   |
|------|------|-----|-----|-----|---------|--------|--------|------------|---|
| ATOM | 3899 | CZ  | PHE | 492 | -33.639 | 17.129 | 38.728 | 1.00104.71 | C |
| ATOM | 3900 | C   | PHE | 492 | -38.462 | 16.162 | 40.073 | 1.00104.71 | C |
| ATOM | 3901 | O   | PHE | 492 | -38.922 | 16.197 | 41.213 | 1.00104.71 | O |
| ATOM | 3902 | N   | LEU | 493 | -38.303 | 17.283 | 39.345 | 1.00 84.54 | N |
| ATOM | 3903 | CA  | LEU | 493 | -38.654 | 18.560 | 39.903 | 1.00 84.54 | C |
| ATOM | 3904 | CB  | LEU | 493 | -38.555 | 19.711 | 38.884 | 1.00 84.54 | C |
| ATOM | 3905 | CG  | LEU | 493 | -37.130 | 20.052 | 38.420 | 1.00 84.54 | C |
| ATOM | 3906 | CD1 | LEU | 493 | -37.147 | 21.217 | 37.416 | 1.00 84.54 | C |
| ATOM | 3907 | CD2 | LEU | 493 | -36.202 | 20.333 | 39.614 | 1.00 84.54 | C |
| ATOM | 3908 | C   | LEU | 493 | -40.088 | 18.545 | 40.349 | 1.00 84.54 | C |
| ATOM | 3909 | O   | LEU | 493 | -40.406 | 19.037 | 41.429 | 1.00 84.54 | O |
| ATOM | 3910 | N   | ASN | 494 | -41.014 | 18.054 | 39.508 | 1.00110.59 | N |
| ATOM | 3911 | CA  | ASN | 494 | -42.392 | 18.020 | 39.910 | 1.00110.59 | C |
| ATOM | 3912 | CB  | ASN | 494 | -43.356 | 17.944 | 38.721 | 1.00110.59 | C |
| ATOM | 3913 | CG  | ASN | 494 | -43.313 | 19.312 | 38.062 | 1.00110.59 | C |
| ATOM | 3914 | OD1 | ASN | 494 | -43.522 | 20.331 | 38.721 | 1.00110.59 | O |
| ATOM | 3915 | ND2 | ASN | 494 | -43.014 | 19.346 | 36.736 | 1.00110.59 | N |
| ATOM | 3916 | C   | ASN | 494 | -42.712 | 16.890 | 40.849 | 1.00110.59 | C |
| ATOM | 3917 | O   | ASN | 494 | -43.398 | 17.081 | 41.852 | 1.00110.59 | O |
| ATOM | 3918 | N   | GLU | 495 | -42.209 | 15.678 | 40.556 | 1.00139.74 | N |
| ATOM | 3919 | CA  | GLU | 495 | -42.593 | 14.506 | 41.297 | 1.00139.74 | C |
| ATOM | 3920 | CB  | GLU | 495 | -41.951 | 13.231 | 40.713 | 1.00139.74 | C |
| ATOM | 3921 | CG  | GLU | 495 | -42.197 | 13.040 | 39.207 | 1.00139.74 | C |
| ATOM | 3922 | CD  | GLU | 495 | -43.667 | 12.744 | 38.941 | 1.00139.74 | C |
| ATOM | 3923 | OE1 | GLU | 495 | -44.133 | 11.641 | 39.334 | 1.00139.74 | O |
| ATOM | 3924 | OE2 | GLU | 495 | -44.341 | 13.615 | 38.328 | 1.00139.74 | O |
| ATOM | 3925 | C   | GLU | 495 | -42.156 | 14.634 | 42.721 | 1.00139.74 | C |
| ATOM | 3926 | O   | GLU | 495 | -42.888 | 14.280 | 43.643 | 1.00139.74 | O |
| ATOM | 3927 | N   | ASP | 496 | -40.917 | 15.113 | 42.908 | 1.00113.57 | N |
| ATOM | 3928 | CA  | ASP | 496 | -40.250 | 15.324 | 44.160 | 1.00113.57 | C |
| ATOM | 3929 | CB  | ASP | 496 | -38.728 | 15.311 | 44.000 | 1.00113.57 | C |
| ATOM | 3930 | CG  | ASP | 496 | -38.426 | 13.874 | 43.585 | 1.00113.57 | C |
| ATOM | 3931 | OD1 | ASP | 496 | -39.266 | 12.991 | 43.909 | 1.00113.57 | O |
| ATOM | 3932 | OD2 | ASP | 496 | -37.377 | 13.636 | 42.932 | 1.00113.57 | O |
| ATOM | 3933 | C   | ASP | 496 | -40.732 | 16.574 | 44.833 | 1.00113.57 | C |
| ATOM | 3934 | O   | ASP | 496 | -40.376 | 16.828 | 45.982 | 1.00113.57 | O |
| ATOM | 3935 | N   | HIS | 497 | -41.506 | 17.414 | 44.116 | 1.00 96.33 | N |
| ATOM | 3936 | CA  | HIS | 497 | -42.048 | 18.626 | 44.670 | 1.00 96.33 | C |
| ATOM | 3937 | ND1 | HIS | 497 | -45.310 | 17.968 | 45.035 | 1.00 96.33 | N |
| ATOM | 3938 | CG  | HIS | 497 | -44.129 | 17.502 | 45.568 | 1.00 96.33 | C |
| ATOM | 3939 | CB  | HIS | 497 | -42.950 | 18.370 | 45.890 | 1.00 96.33 | C |
| ATOM | 3940 | NE2 | HIS | 497 | -45.547 | 15.770 | 45.280 | 1.00 96.33 | N |
| ATOM | 3941 | CD2 | HIS | 497 | -44.291 | 16.158 | 45.711 | 1.00 96.33 | C |
| ATOM | 3942 | CE1 | HIS | 497 | -46.122 | 16.891 | 44.883 | 1.00 96.33 | C |
| ATOM | 3943 | C   | HIS | 497 | -40.959 | 19.559 | 45.102 | 1.00 96.33 | C |
| ATOM | 3944 | O   | HIS | 497 | -40.944 | 20.042 | 46.233 | 1.00 96.33 | O |
| ATOM | 3945 | N   | TRP | 498 | -40.016 | 19.843 | 44.188 | 1.00125.57 | N |
| ATOM | 3946 | CA  | TRP | 498 | -38.931 | 20.746 | 44.455 | 1.00125.57 | C |
| ATOM | 3947 | CB  | TRP | 498 | -37.868 | 20.741 | 43.344 | 1.00125.57 | C |
| ATOM | 3948 | CG  | TRP | 498 | -36.935 | 19.556 | 43.446 | 1.00125.57 | C |
| ATOM | 3949 | CD2 | TRP | 498 | -35.506 | 19.649 | 43.353 | 1.00125.57 | C |
| ATOM | 3950 | CD1 | TRP | 498 | -37.224 | 18.233 | 43.604 | 1.00125.57 | C |
| ATOM | 3951 | NE1 | TRP | 498 | -36.064 | 17.499 | 43.642 | 1.00125.57 | N |
| ATOM | 3952 | CE2 | TRP | 498 | -34.997 | 18.357 | 43.480 | 1.00125.57 | C |
| ATOM | 3953 | CE3 | TRP | 498 | -34.684 | 20.724 | 43.171 | 1.00125.57 | C |
| ATOM | 3954 | CZ2 | TRP | 498 | -33.655 | 18.118 | 43.430 | 1.00125.57 | C |
| ATOM | 3955 | CZ3 | TRP | 498 | -33.330 | 20.482 | 43.122 | 1.00125.57 | C |
| ATOM | 3956 | CH2 | TRP | 498 | -32.827 | 19.204 | 43.250 | 1.00125.57 | C |
| ATOM | 3957 | C   | TRP | 498 | -39.446 | 22.142 | 44.676 | 1.00125.57 | C |
| ATOM | 3958 | O   | TRP | 498 | -38.835 | 22.921 | 45.401 | 1.00125.57 | O |
| ATOM | 3959 | N   | MET | 499 | -40.533 | 22.503 | 43.973 | 1.00179.83 | N |
| ATOM | 3960 | CA  | MET | 499 | -41.256 | 23.752 | 43.967 | 1.00179.83 | C |
| ATOM | 3961 | CB  | MET | 499 | -42.101 | 23.945 | 42.695 | 1.00179.83 | C |
| ATOM | 3962 | CG  | MET | 499 | -41.282 | 24.193 | 41.424 | 1.00179.83 | C |
| ATOM | 3963 | SD  | MET | 499 | -40.325 | 22.770 | 40.823 | 1.00179.83 | S |
| ATOM | 3964 | CE  | MET | 499 | -38.840 | 23.139 | 41.801 | 1.00179.83 | C |

|      |      |     |     |     |         |        |        |            |   |
|------|------|-----|-----|-----|---------|--------|--------|------------|---|
| ATOM | 3965 | C   | MET | 499 | -42.174 | 23.945 | 45.142 | 1.00179.83 | C |
| ATOM | 3966 | O   | MET | 499 | -42.745 | 25.025 | 45.288 | 1.00179.83 | O |
| ATOM | 3967 | N   | GLY | 500 | -42.467 | 22.892 | 45.927 | 1.00 46.14 | N |
| ATOM | 3968 | CA  | GLY | 500 | -43.415 | 23.040 | 47.001 | 1.00 46.14 | C |
| ATOM | 3969 | C   | GLY | 500 | -42.953 | 24.146 | 47.895 | 1.00 46.14 | C |
| ATOM | 3970 | O   | GLY | 500 | -41.794 | 24.552 | 47.856 | 1.00 46.14 | O |
| ATOM | 3971 | N   | ARG | 501 | -43.874 | 24.679 | 48.723 | 1.00160.23 | N |
| ATOM | 3972 | CA  | ARG | 501 | -43.529 | 25.796 | 49.555 | 1.00160.23 | C |
| ATOM | 3973 | CB  | ARG | 501 | -44.736 | 26.463 | 50.250 | 1.00160.23 | C |
| ATOM | 3974 | CG  | ARG | 501 | -45.599 | 25.566 | 51.136 | 1.00160.23 | C |
| ATOM | 3975 | CD  | ARG | 501 | -46.845 | 26.295 | 51.651 | 1.00160.23 | C |
| ATOM | 3976 | NE  | ARG | 501 | -47.518 | 26.902 | 50.468 | 1.00160.23 | N |
| ATOM | 3977 | CZ  | ARG | 501 | -47.211 | 28.176 | 50.086 | 1.00160.23 | C |
| ATOM | 3978 | NH1 | ARG | 501 | -46.316 | 28.911 | 50.810 | 1.00160.23 | N |
| ATOM | 3979 | NH2 | ARG | 501 | -47.800 | 28.718 | 48.980 | 1.00160.23 | N |
| ATOM | 3980 | C   | ARG | 501 | -42.485 | 25.410 | 50.560 | 1.00160.23 | C |
| ATOM | 3981 | O   | ARG | 501 | -41.596 | 26.206 | 50.862 | 1.00160.23 | O |
| ATOM | 3982 | N   | GLU | 502 | -42.536 | 24.180 | 51.106 | 1.00 51.04 | N |
| ATOM | 3983 | CA  | GLU | 502 | -41.559 | 23.839 | 52.100 | 1.00 51.04 | C |
| ATOM | 3984 | CB  | GLU | 502 | -41.713 | 22.411 | 52.656 | 1.00 51.04 | C |
| ATOM | 3985 | CG  | GLU | 502 | -40.658 | 22.075 | 53.717 | 1.00 51.04 | C |
| ATOM | 3986 | CD  | GLU | 502 | -40.854 | 20.639 | 54.185 | 1.00 51.04 | C |
| ATOM | 3987 | OE1 | GLU | 502 | -41.823 | 19.984 | 53.715 | 1.00 51.04 | O |
| ATOM | 3988 | OE2 | GLU | 502 | -40.032 | 20.177 | 55.022 | 1.00 51.04 | O |
| ATOM | 3989 | C   | GLU | 502 | -40.178 | 23.908 | 51.517 | 1.00 51.04 | C |
| ATOM | 3990 | O   | GLU | 502 | -39.270 | 24.472 | 52.126 | 1.00 51.04 | O |
| ATOM | 3991 | N   | ASN | 503 | -39.972 | 23.302 | 50.335 | 1.00 87.99 | N |
| ATOM | 3992 | CA  | ASN | 503 | -38.660 | 23.260 | 49.750 | 1.00 87.99 | C |
| ATOM | 3993 | CB  | ASN | 503 | -38.518 | 22.195 | 48.650 | 1.00 87.99 | C |
| ATOM | 3994 | CG  | ASN | 503 | -37.027 | 21.970 | 48.433 | 1.00 87.99 | C |
| ATOM | 3995 | OD1 | ASN | 503 | -36.331 | 21.466 | 49.313 | 1.00 87.99 | O |
| ATOM | 3996 | ND2 | ASN | 503 | -36.520 | 22.348 | 47.231 | 1.00 87.99 | N |
| ATOM | 3997 | C   | ASN | 503 | -38.203 | 24.571 | 49.161 | 1.00 87.99 | C |
| ATOM | 3998 | O   | ASN | 503 | -37.051 | 24.961 | 49.348 | 1.00 87.99 | O |
| ATOM | 3999 | N   | SER | 504 | -39.071 | 25.241 | 48.371 | 1.00 83.30 | N |
| ATOM | 4000 | CA  | SER | 504 | -38.737 | 26.451 | 47.654 | 1.00 83.30 | C |
| ATOM | 4001 | CB  | SER | 504 | -39.566 | 26.621 | 46.368 | 1.00 83.30 | C |
| ATOM | 4002 | OG  | SER | 504 | -40.945 | 26.749 | 46.682 | 1.00 83.30 | O |
| ATOM | 4003 | C   | SER | 504 | -38.877 | 27.707 | 48.466 | 1.00 83.30 | C |
| ATOM | 4004 | O   | SER | 504 | -38.252 | 28.720 | 48.155 | 1.00 83.30 | O |
| ATOM | 4005 | N   | GLY | 505 | -39.774 | 27.708 | 49.466 | 1.00 58.47 | N |
| ATOM | 4006 | CA  | GLY | 505 | -39.980 | 28.852 | 50.309 | 1.00 58.47 | C |
| ATOM | 4007 | C   | GLY | 505 | -41.013 | 29.732 | 49.662 | 1.00 58.47 | C |
| ATOM | 4008 | O   | GLY | 505 | -42.029 | 30.065 | 50.270 | 1.00 58.47 | O |
| ATOM | 4009 | N   | GLY | 506 | -40.722 | 30.183 | 48.422 | 1.00 70.16 | N |
| ATOM | 4010 | CA  | GLY | 506 | -41.572 | 31.010 | 47.602 | 1.00 70.16 | C |
| ATOM | 4011 | C   | GLY | 506 | -42.689 | 30.267 | 46.907 | 1.00 70.16 | C |
| ATOM | 4012 | O   | GLY | 506 | -43.763 | 30.825 | 46.689 | 1.00 70.16 | O |
| ATOM | 4013 | N   | GLY | 507 | -42.436 | 29.009 | 46.482 | 1.00 76.21 | N |
| ATOM | 4014 | CA  | GLY | 507 | -43.346 | 28.258 | 45.641 | 1.00 76.21 | C |
| ATOM | 4015 | C   | GLY | 507 | -44.590 | 27.792 | 46.355 | 1.00 76.21 | C |
| ATOM | 4016 | O   | GLY | 507 | -44.661 | 27.745 | 47.580 | 1.00 76.21 | O |
| ATOM | 4017 | N   | VAL | 508 | -45.668 | 27.633 | 45.552 | 1.00161.89 | N |
| ATOM | 4018 | CA  | VAL | 508 | -46.993 | 27.133 | 45.838 | 1.00161.89 | C |
| ATOM | 4019 | CB  | VAL | 508 | -48.070 | 28.040 | 45.326 | 1.00161.89 | C |
| ATOM | 4020 | CG1 | VAL | 508 | -47.987 | 29.352 | 46.125 | 1.00161.89 | C |
| ATOM | 4021 | CG2 | VAL | 508 | -47.881 | 28.234 | 43.813 | 1.00161.89 | C |
| ATOM | 4022 | C   | VAL | 508 | -47.300 | 25.722 | 45.407 | 1.00161.89 | C |
| ATOM | 4023 | O   | VAL | 508 | -48.414 | 25.256 | 45.650 | 1.00161.89 | O |
| ATOM | 4024 | N   | GLU | 509 | -46.397 | 25.052 | 44.662 | 1.00146.88 | N |
| ATOM | 4025 | CA  | GLU | 509 | -46.722 | 23.817 | 43.990 | 1.00146.88 | C |
| ATOM | 4026 | CB  | GLU | 509 | -45.491 | 23.134 | 43.363 | 1.00146.88 | C |
| ATOM | 4027 | CG  | GLU | 509 | -45.830 | 21.994 | 42.399 | 1.00146.88 | C |
| ATOM | 4028 | CD  | GLU | 509 | -45.922 | 20.701 | 43.197 | 1.00146.88 | C |
| ATOM | 4029 | OE1 | GLU | 509 | -45.540 | 20.723 | 44.396 | 1.00146.88 | O |
| ATOM | 4030 | OE2 | GLU | 509 | -46.369 | 19.676 | 42.618 | 1.00146.88 | O |

|      |      |     |     |     |         |        |        |            |   |
|------|------|-----|-----|-----|---------|--------|--------|------------|---|
| ATOM | 4031 | C   | GLU | 509 | -47.438 | 22.825 | 44.858 | 1.00146.88 | C |
| ATOM | 4032 | O   | GLU | 509 | -47.030 | 22.527 | 45.979 | 1.00146.88 | O |
| ATOM | 4033 | N   | GLY | 510 | -48.558 | 22.294 | 44.314 | 1.00109.45 | N |
| ATOM | 4034 | CA  | GLY | 510 | -49.347 | 21.268 | 44.937 | 1.00109.45 | C |
| ATOM | 4035 | C   | GLY | 510 | -50.532 | 21.857 | 45.641 | 1.00109.45 | C |
| ATOM | 4036 | O   | GLY | 510 | -51.488 | 21.144 | 45.937 | 1.00109.45 | O |
| ATOM | 4037 | N   | LEU | 511 | -50.517 | 23.170 | 45.923 | 1.00315.69 | N |
| ATOM | 4038 | CA  | LEU | 511 | -51.614 | 23.753 | 46.645 | 1.00315.69 | C |
| ATOM | 4039 | CB  | LEU | 511 | -51.272 | 25.107 | 47.293 | 1.00315.69 | C |
| ATOM | 4040 | CG  | LEU | 511 | -50.341 | 25.031 | 48.517 | 1.00315.69 | C |
| ATOM | 4041 | CD1 | LEU | 511 | -48.988 | 24.394 | 48.187 | 1.00315.69 | C |
| ATOM | 4042 | CD2 | LEU | 511 | -50.180 | 26.417 | 49.153 | 1.00315.69 | C |
| ATOM | 4043 | C   | LEU | 511 | -52.776 | 24.009 | 45.728 | 1.00315.69 | C |
| ATOM | 4044 | O   | LEU | 511 | -52.612 | 24.422 | 44.582 | 1.00315.69 | O |
| ATOM | 4045 | N   | GLY | 512 | -54.006 | 23.775 | 46.229 | 1.00143.10 | N |
| ATOM | 4046 | CA  | GLY | 512 | -55.196 | 24.041 | 45.472 | 1.00143.10 | C |
| ATOM | 4047 | C   | GLY | 512 | -55.568 | 25.472 | 45.710 | 1.00143.10 | C |
| ATOM | 4048 | O   | GLY | 512 | -54.931 | 26.178 | 46.489 | 1.00143.10 | O |
| ATOM | 4049 | N   | LEU | 513 | -56.651 | 25.917 | 45.047 | 1.00130.83 | N |
| ATOM | 4050 | CA  | LEU | 513 | -57.108 | 27.279 | 45.100 | 1.00130.83 | C |
| ATOM | 4051 | CB  | LEU | 513 | -58.289 | 27.529 | 44.140 | 1.00130.83 | C |
| ATOM | 4052 | CG  | LEU | 513 | -58.777 | 28.991 | 44.090 | 1.00130.83 | C |
| ATOM | 4053 | CD1 | LEU | 513 | -57.666 | 29.933 | 43.598 | 1.00130.83 | C |
| ATOM | 4054 | CD2 | LEU | 513 | -60.062 | 29.119 | 43.254 | 1.00130.83 | C |
| ATOM | 4055 | C   | LEU | 513 | -57.550 | 27.594 | 46.498 | 1.00130.83 | C |
| ATOM | 4056 | O   | LEU | 513 | -57.390 | 28.715 | 46.981 | 1.00130.83 | O |
| ATOM | 4057 | N   | GLN | 514 | -58.112 | 26.587 | 47.188 | 1.00152.33 | N |
| ATOM | 4058 | CA  | GLN | 514 | -58.664 | 26.735 | 48.502 | 1.00152.33 | C |
| ATOM | 4059 | CB  | GLN | 514 | -59.220 | 25.405 | 49.039 | 1.00152.33 | C |
| ATOM | 4060 | CG  | GLN | 514 | -60.232 | 24.738 | 48.100 | 1.00152.33 | C |
| ATOM | 4061 | CD  | GLN | 514 | -59.458 | 24.002 | 47.013 | 1.00152.33 | C |
| ATOM | 4062 | OE1 | GLN | 514 | -58.540 | 23.233 | 47.296 | 1.00152.33 | O |
| ATOM | 4063 | NE2 | GLN | 514 | -59.833 | 24.240 | 45.729 | 1.00152.33 | N |
| ATOM | 4064 | C   | GLN | 514 | -57.588 | 27.179 | 49.458 | 1.00152.33 | C |
| ATOM | 4065 | O   | GLN | 514 | -57.885 | 27.812 | 50.466 | 1.00152.33 | O |
| ATOM | 4066 | N   | ARG | 515 | -56.337 | 26.735 | 49.236 | 1.00203.20 | N |
| ATOM | 4067 | CA  | ARG | 515 | -55.164 | 27.025 | 50.028 | 1.00203.20 | C |
| ATOM | 4068 | CB  | ARG | 515 | -54.062 | 25.995 | 49.747 | 1.00203.20 | C |
| ATOM | 4069 | CG  | ARG | 515 | -52.899 | 26.057 | 50.729 | 1.00203.20 | C |
| ATOM | 4070 | CD  | ARG | 515 | -53.274 | 25.607 | 52.139 | 1.00203.20 | C |
| ATOM | 4071 | NE  | ARG | 515 | -52.015 | 25.536 | 52.932 | 1.00203.20 | N |
| ATOM | 4072 | CZ  | ARG | 515 | -51.493 | 26.670 | 53.481 | 1.00203.20 | C |
| ATOM | 4073 | NH1 | ARG | 515 | -52.092 | 27.875 | 53.254 | 1.00203.20 | N |
| ATOM | 4074 | NH2 | ARG | 515 | -50.370 | 26.600 | 54.254 | 1.00203.20 | N |
| ATOM | 4075 | C   | ARG | 515 | -54.556 | 28.396 | 49.814 | 1.00203.20 | C |
| ATOM | 4076 | O   | ARG | 515 | -54.031 | 29.010 | 50.743 | 1.00203.20 | O |
| ATOM | 4077 | N   | LEU | 516 | -54.614 | 28.922 | 48.579 | 1.00 85.11 | N |
| ATOM | 4078 | CA  | LEU | 516 | -53.865 | 30.086 | 48.178 | 1.00 85.11 | C |
| ATOM | 4079 | CB  | LEU | 516 | -54.123 | 30.448 | 46.708 | 1.00 85.11 | C |
| ATOM | 4080 | CG  | LEU | 516 | -53.700 | 29.325 | 45.742 | 1.00 85.11 | C |
| ATOM | 4081 | CD1 | LEU | 516 | -53.969 | 29.711 | 44.280 | 1.00 85.11 | C |
| ATOM | 4082 | CD2 | LEU | 516 | -52.248 | 28.889 | 45.996 | 1.00 85.11 | C |
| ATOM | 4083 | C   | LEU | 516 | -54.169 | 31.295 | 49.011 | 1.00 85.11 | C |
| ATOM | 4084 | O   | LEU | 516 | -53.268 | 32.085 | 49.298 | 1.00 85.11 | O |
| ATOM | 4085 | N   | GLY | 517 | -55.438 | 31.500 | 49.400 | 1.00 37.14 | N |
| ATOM | 4086 | CA  | GLY | 517 | -55.785 | 32.672 | 50.161 | 1.00 37.14 | C |
| ATOM | 4087 | C   | GLY | 517 | -55.067 | 32.659 | 51.476 | 1.00 37.14 | C |
| ATOM | 4088 | O   | GLY | 517 | -54.569 | 33.691 | 51.925 | 1.00 37.14 | O |
| ATOM | 4089 | N   | TYR | 518 | -54.993 | 31.481 | 52.125 | 1.00 81.43 | N |
| ATOM | 4090 | CA  | TYR | 518 | -54.377 | 31.364 | 53.416 | 1.00 81.43 | C |
| ATOM | 4091 | CB  | TYR | 518 | -54.483 | 29.945 | 54.011 | 1.00 81.43 | C |
| ATOM | 4092 | CG  | TYR | 518 | -55.933 | 29.624 | 54.181 | 1.00 81.43 | C |
| ATOM | 4093 | CD1 | TYR | 518 | -56.615 | 30.013 | 55.310 | 1.00 81.43 | C |
| ATOM | 4094 | CD2 | TYR | 518 | -56.617 | 28.944 | 53.199 | 1.00 81.43 | C |
| ATOM | 4095 | CE1 | TYR | 518 | -57.952 | 29.720 | 55.461 | 1.00 81.43 | C |
| ATOM | 4096 | CE2 | TYR | 518 | -57.953 | 28.648 | 53.343 | 1.00 81.43 | C |

|      |      |     |     |     |         |        |        |      |        |   |
|------|------|-----|-----|-----|---------|--------|--------|------|--------|---|
| ATOM | 4097 | CZ  | TYR | 518 | -58.625 | 29.036 | 54.477 | 1.00 | 81.43  | C |
| ATOM | 4098 | OH  | TYR | 518 | -59.996 | 28.736 | 54.631 | 1.00 | 81.43  | O |
| ATOM | 4099 | C   | TYR | 518 | -52.921 | 31.724 | 53.317 | 1.00 | 81.43  | C |
| ATOM | 4100 | O   | TYR | 518 | -52.378 | 32.353 | 54.223 | 1.00 | 81.43  | O |
| ATOM | 4101 | N   | ILE | 519 | -52.234 | 31.310 | 52.230 | 1.00 | 116.79 | N |
| ATOM | 4102 | CA  | ILE | 519 | -50.829 | 31.613 | 52.086 | 1.00 | 116.79 | C |
| ATOM | 4103 | CB  | ILE | 519 | -50.154 | 31.022 | 50.869 | 1.00 | 116.79 | C |
| ATOM | 4104 | CG1 | ILE | 519 | -50.039 | 29.487 | 50.931 | 1.00 | 116.79 | C |
| ATOM | 4105 | CG2 | ILE | 519 | -48.780 | 31.701 | 50.746 | 1.00 | 116.79 | C |
| ATOM | 4106 | CD1 | ILE | 519 | -51.315 | 28.727 | 50.599 | 1.00 | 116.79 | C |
| ATOM | 4107 | C   | ILE | 519 | -50.629 | 33.094 | 51.971 | 1.00 | 116.79 | C |
| ATOM | 4108 | O   | ILE | 519 | -49.695 | 33.659 | 52.537 | 1.00 | 116.79 | O |
| ATOM | 4109 | N   | LEU | 520 | -51.509 | 33.754 | 51.207 | 1.00 | 165.17 | N |
| ATOM | 4110 | CA  | LEU | 520 | -51.408 | 35.152 | 50.915 | 1.00 | 165.17 | C |
| ATOM | 4111 | CB  | LEU | 520 | -52.521 | 35.507 | 49.908 | 1.00 | 165.17 | C |
| ATOM | 4112 | CG  | LEU | 520 | -52.286 | 36.748 | 49.034 | 1.00 | 165.17 | C |
| ATOM | 4113 | CD1 | LEU | 520 | -52.380 | 38.052 | 49.821 | 1.00 | 165.17 | C |
| ATOM | 4114 | CD2 | LEU | 520 | -50.971 | 36.607 | 48.250 | 1.00 | 165.17 | C |
| ATOM | 4115 | C   | LEU | 520 | -51.547 | 35.893 | 52.222 | 1.00 | 165.17 | C |
| ATOM | 4116 | O   | LEU | 520 | -50.848 | 36.878 | 52.467 | 1.00 | 165.17 | O |
| ATOM | 4117 | N   | GLU | 521 | -52.448 | 35.414 | 53.108 | 1.00 | 81.41  | N |
| ATOM | 4118 | CA  | GLU | 521 | -52.671 | 36.018 | 54.395 | 1.00 | 81.41  | C |
| ATOM | 4119 | CB  | GLU | 521 | -53.818 | 35.352 | 55.177 | 1.00 | 81.41  | C |
| ATOM | 4120 | CG  | GLU | 521 | -53.954 | 35.866 | 56.613 | 1.00 | 81.41  | C |
| ATOM | 4121 | CD  | GLU | 521 | -54.372 | 37.327 | 56.565 | 1.00 | 81.41  | C |
| ATOM | 4122 | OE1 | GLU | 521 | -53.504 | 38.177 | 56.233 | 1.00 | 81.41  | O |
| ATOM | 4123 | OE2 | GLU | 521 | -55.564 | 37.612 | 56.857 | 1.00 | 81.41  | O |
| ATOM | 4124 | C   | GLU | 521 | -51.433 | 35.895 | 55.227 | 1.00 | 81.41  | C |
| ATOM | 4125 | O   | GLU | 521 | -51.060 | 36.820 | 55.946 | 1.00 | 81.41  | O |
| ATOM | 4126 | N   | GLU | 522 | -50.762 | 34.735 | 55.142 | 1.00 | 96.84  | N |
| ATOM | 4127 | CA  | GLU | 522 | -49.572 | 34.476 | 55.900 | 1.00 | 96.84  | C |
| ATOM | 4128 | CB  | GLU | 522 | -48.995 | 33.087 | 55.581 | 1.00 | 96.84  | C |
| ATOM | 4129 | CG  | GLU | 522 | -47.714 | 32.733 | 56.334 | 1.00 | 96.84  | C |
| ATOM | 4130 | CD  | GLU | 522 | -47.228 | 31.396 | 55.790 | 1.00 | 96.84  | C |
| ATOM | 4131 | OE1 | GLU | 522 | -48.073 | 30.468 | 55.675 | 1.00 | 96.84  | O |
| ATOM | 4132 | OE2 | GLU | 522 | -46.014 | 31.286 | 55.471 | 1.00 | 96.84  | O |
| ATOM | 4133 | C   | GLU | 522 | -48.521 | 35.475 | 55.514 | 1.00 | 96.84  | C |
| ATOM | 4134 | O   | GLU | 522 | -47.802 | 35.995 | 56.365 | 1.00 | 96.84  | O |
| ATOM | 4135 | N   | MET | 523 | -48.396 | 35.775 | 54.210 | 1.00 | 135.18 | N |
| ATOM | 4136 | CA  | MET | 523 | -47.379 | 36.692 | 53.778 | 1.00 | 135.18 | C |
| ATOM | 4137 | CB  | MET | 523 | -47.249 | 36.813 | 52.248 | 1.00 | 135.18 | C |
| ATOM | 4138 | CG  | MET | 523 | -48.362 | 37.610 | 51.569 | 1.00 | 135.18 | C |
| ATOM | 4139 | SD  | MET | 523 | -48.143 | 37.789 | 49.773 | 1.00 | 135.18 | S |
| ATOM | 4140 | CE  | MET | 523 | -49.505 | 38.971 | 49.560 | 1.00 | 135.18 | C |
| ATOM | 4141 | C   | MET | 523 | -47.666 | 38.060 | 54.329 | 1.00 | 135.18 | C |
| ATOM | 4142 | O   | MET | 523 | -46.749 | 38.809 | 54.665 | 1.00 | 135.18 | O |
| ATOM | 4143 | N   | ASN | 524 | -48.957 | 38.418 | 54.448 | 1.00 | 93.50  | N |
| ATOM | 4144 | CA  | ASN | 524 | -49.360 | 39.723 | 54.902 | 1.00 | 93.50  | C |
| ATOM | 4145 | CB  | ASN | 524 | -50.891 | 39.894 | 54.932 | 1.00 | 93.50  | C |
| ATOM | 4146 | CG  | ASN | 524 | -51.219 | 41.366 | 55.156 | 1.00 | 93.50  | C |
| ATOM | 4147 | OD1 | ASN | 524 | -50.900 | 41.941 | 56.195 | 1.00 | 93.50  | O |
| ATOM | 4148 | ND2 | ASN | 524 | -51.878 | 41.999 | 54.148 | 1.00 | 93.50  | N |
| ATOM | 4149 | C   | ASN | 524 | -48.845 | 39.963 | 56.289 | 1.00 | 93.50  | C |
| ATOM | 4150 | O   | ASN | 524 | -48.551 | 41.100 | 56.658 | 1.00 | 93.50  | O |
| ATOM | 4151 | N   | ARG | 525 | -48.720 | 38.906 | 57.108 | 1.00 | 139.85 | N |
| ATOM | 4152 | CA  | ARG | 525 | -48.306 | 39.115 | 58.468 | 1.00 | 139.85 | C |
| ATOM | 4153 | CB  | ARG | 525 | -48.342 | 37.862 | 59.369 | 1.00 | 139.85 | C |
| ATOM | 4154 | CG  | ARG | 525 | -47.401 | 36.727 | 58.969 | 1.00 | 139.85 | C |
| ATOM | 4155 | CD  | ARG | 525 | -47.480 | 35.517 | 59.904 | 1.00 | 139.85 | C |
| ATOM | 4156 | NE  | ARG | 525 | -46.563 | 34.472 | 59.367 | 1.00 | 139.85 | N |
| ATOM | 4157 | CZ  | ARG | 525 | -45.231 | 34.512 | 59.661 | 1.00 | 139.85 | C |
| ATOM | 4158 | NH1 | ARG | 525 | -44.730 | 35.525 | 60.427 | 1.00 | 139.85 | N |
| ATOM | 4159 | NH2 | ARG | 525 | -44.399 | 33.541 | 59.185 | 1.00 | 139.85 | N |
| ATOM | 4160 | C   | ARG | 525 | -46.920 | 39.684 | 58.506 | 1.00 | 139.85 | C |
| ATOM | 4161 | O   | ARG | 525 | -46.597 | 40.439 | 59.422 | 1.00 | 139.85 | O |
| ATOM | 4162 | N   | ALA | 526 | -46.052 | 39.332 | 57.536 | 1.00 | 45.93  | N |

|      |      |     |     |     |         |        |        |            |       |   |
|------|------|-----|-----|-----|---------|--------|--------|------------|-------|---|
| ATOM | 4163 | CA  | ALA | 526 | -44.694 | 39.809 | 57.570 | 1.00       | 45.93 | C |
| ATOM | 4164 | CB  | ALA | 526 | -43.814 | 39.237 | 56.442 | 1.00       | 45.93 | C |
| ATOM | 4165 | C   | ALA | 526 | -44.661 | 41.307 | 57.453 | 1.00       | 45.93 | C |
| ATOM | 4166 | O   | ALA | 526 | -45.364 | 41.910 | 56.644 | 1.00       | 45.93 | O |
| ATOM | 4167 | N   | PRO | 527 | -43.837 | 41.926 | 58.260 | 1.00123.34 |       | N |
| ATOM | 4168 | CA  | PRO | 527 | -43.736 | 43.361 | 58.198 | 1.00123.34 |       | C |
| ATOM | 4169 | CD  | PRO | 527 | -43.656 | 41.438 | 59.619 | 1.00123.34 |       | C |
| ATOM | 4170 | CB  | PRO | 527 | -43.082 | 43.797 | 59.507 | 1.00123.34 |       | C |
| ATOM | 4171 | CG  | PRO | 527 | -43.494 | 42.691 | 60.496 | 1.00123.34 |       | C |
| ATOM | 4172 | C   | PRO | 527 | -42.999 | 43.791 | 56.970 | 1.00123.34 |       | C |
| ATOM | 4173 | O   | PRO | 527 | -42.124 | 43.058 | 56.515 | 1.00123.34 |       | O |
| ATOM | 4174 | N   | GLY | 528 | -43.330 | 44.977 | 56.422 | 1.00       | 23.65 | N |
| ATOM | 4175 | CA  | GLY | 528 | -42.662 | 45.432 | 55.239 | 1.00       | 23.65 | C |
| ATOM | 4176 | C   | GLY | 528 | -43.566 | 46.398 | 54.544 | 1.00       | 23.65 | C |
| ATOM | 4177 | O   | GLY | 528 | -44.451 | 46.991 | 55.158 | 1.00       | 23.65 | O |
| ATOM | 4178 | N   | GLY | 529 | -43.362 | 46.563 | 53.222 | 1.00       | 29.10 | N |
| ATOM | 4179 | CA  | GLY | 529 | -44.124 | 47.499 | 52.449 | 1.00       | 29.10 | C |
| ATOM | 4180 | C   | GLY | 529 | -45.386 | 46.833 | 51.994 | 1.00       | 29.10 | C |
| ATOM | 4181 | O   | GLY | 529 | -45.873 | 45.893 | 52.618 | 1.00       | 29.10 | O |
| ATOM | 4182 | N   | LYS | 530 | -45.959 | 47.344 | 50.885 | 1.00       | 80.45 | N |
| ATOM | 4183 | CA  | LYS | 530 | -47.192 | 46.852 | 50.345 | 1.00       | 80.45 | C |
| ATOM | 4184 | CB  | LYS | 530 | -47.851 | 47.814 | 49.340 | 1.00       | 80.45 | C |
| ATOM | 4185 | CG  | LYS | 530 | -48.273 | 49.151 | 49.949 | 1.00       | 80.45 | C |
| ATOM | 4186 | CD  | LYS | 530 | -48.670 | 50.195 | 48.903 | 1.00       | 80.45 | C |
| ATOM | 4187 | CE  | LYS | 530 | -47.488 | 50.743 | 48.101 | 1.00       | 80.45 | C |
| ATOM | 4188 | NZ  | LYS | 530 | -47.972 | 51.654 | 47.040 | 1.00       | 80.45 | N |
| ATOM | 4189 | C   | LYS | 530 | -46.930 | 45.574 | 49.612 | 1.00       | 80.45 | C |
| ATOM | 4190 | O   | LYS | 530 | -45.781 | 45.227 | 49.340 | 1.00       | 80.45 | O |
| ATOM | 4191 | N   | MET | 531 | -48.005 | 44.812 | 49.312 | 1.00110.16 |       | N |
| ATOM | 4192 | CA  | MET | 531 | -47.835 | 43.602 | 48.557 | 1.00110.16 |       | C |
| ATOM | 4193 | CB  | MET | 531 | -48.872 | 42.489 | 48.809 | 1.00110.16 |       | C |
| ATOM | 4194 | CG  | MET | 531 | -48.820 | 41.850 | 50.195 | 1.00110.16 |       | C |
| ATOM | 4195 | SD  | MET | 531 | -49.629 | 42.811 | 51.500 | 1.00110.16 |       | S |
| ATOM | 4196 | CE  | MET | 531 | -51.291 | 42.399 | 50.905 | 1.00110.16 |       | C |
| ATOM | 4197 | C   | MET | 531 | -47.964 | 43.945 | 47.106 | 1.00110.16 |       | C |
| ATOM | 4198 | O   | MET | 531 | -48.908 | 44.621 | 46.701 | 1.00110.16 |       | O |
| ATOM | 4199 | N   | TYR | 532 | -47.022 | 43.447 | 46.277 | 1.00       | 71.34 | N |
| ATOM | 4200 | CA  | TYR | 532 | -47.023 | 43.756 | 44.873 | 1.00       | 71.34 | C |
| ATOM | 4201 | CB  | TYR | 532 | -45.677 | 44.288 | 44.352 | 1.00       | 71.34 | C |
| ATOM | 4202 | CG  | TYR | 532 | -45.423 | 45.618 | 44.968 | 1.00       | 71.34 | C |
| ATOM | 4203 | CD1 | TYR | 532 | -44.849 | 45.719 | 46.214 | 1.00       | 71.34 | C |
| ATOM | 4204 | CD2 | TYR | 532 | -45.759 | 46.766 | 44.290 | 1.00       | 71.34 | C |
| ATOM | 4205 | CE1 | TYR | 532 | -44.616 | 46.952 | 46.777 | 1.00       | 71.34 | C |
| ATOM | 4206 | CE2 | TYR | 532 | -45.530 | 48.001 | 44.847 | 1.00       | 71.34 | C |
| ATOM | 4207 | CZ  | TYR | 532 | -44.958 | 48.095 | 46.093 | 1.00       | 71.34 | C |
| ATOM | 4208 | OH  | TYR | 532 | -44.721 | 49.361 | 46.668 | 1.00       | 71.34 | O |
| ATOM | 4209 | C   | TYR | 532 | -47.272 | 42.494 | 44.108 | 1.00       | 71.34 | C |
| ATOM | 4210 | O   | TYR | 532 | -46.831 | 41.416 | 44.507 | 1.00       | 71.34 | O |
| ATOM | 4211 | N   | ALA | 533 | -48.054 | 42.590 | 43.012 | 1.00       | 73.66 | N |
| ATOM | 4212 | CA  | ALA | 533 | -48.228 | 41.439 | 42.175 | 1.00       | 73.66 | C |
| ATOM | 4213 | CB  | ALA | 533 | -49.559 | 40.708 | 42.427 | 1.00       | 73.66 | C |
| ATOM | 4214 | C   | ALA | 533 | -48.245 | 41.914 | 40.753 | 1.00       | 73.66 | C |
| ATOM | 4215 | O   | ALA | 533 | -49.310 | 42.154 | 40.189 | 1.00       | 73.66 | O |
| ATOM | 4216 | N   | ASP | 534 | -47.064 | 41.977 | 40.106 | 1.00       | 64.21 | N |
| ATOM | 4217 | CA  | ASP | 534 | -46.981 | 42.478 | 38.760 | 1.00       | 64.21 | C |
| ATOM | 4218 | CB  | ASP | 534 | -45.702 | 43.298 | 38.499 | 1.00       | 64.21 | C |
| ATOM | 4219 | CG  | ASP | 534 | -45.778 | 44.593 | 39.300 | 1.00       | 64.21 | C |
| ATOM | 4220 | OD1 | ASP | 534 | -46.915 | 45.057 | 39.576 | 1.00       | 64.21 | O |
| ATOM | 4221 | OD2 | ASP | 534 | -44.694 | 45.133 | 39.649 | 1.00       | 64.21 | O |
| ATOM | 4222 | C   | ASP | 534 | -46.976 | 41.327 | 37.799 | 1.00       | 64.21 | C |
| ATOM | 4223 | O   | ASP | 534 | -46.294 | 40.324 | 38.008 | 1.00       | 64.21 | O |
| ATOM | 4224 | N   | ASP | 535 | -47.761 | 41.453 | 36.707 | 1.00       | 57.40 | N |
| ATOM | 4225 | CA  | ASP | 535 | -47.845 | 40.432 | 35.697 | 1.00       | 57.40 | C |
| ATOM | 4226 | CB  | ASP | 535 | -49.211 | 40.357 | 34.993 | 1.00       | 57.40 | C |
| ATOM | 4227 | CG  | ASP | 535 | -50.229 | 39.744 | 35.939 | 1.00       | 57.40 | C |
| ATOM | 4228 | OD1 | ASP | 535 | -49.807 | 39.160 | 36.971 | 1.00       | 57.40 | O |



|      |      |     |     |     |         |        |        |            |       |   |
|------|------|-----|-----|-----|---------|--------|--------|------------|-------|---|
| ATOM | 4229 | OD2 | ASP | 535 | -51.447 | 39.845 | 35.634 | 1.00       | 57.40 | O |
| ATOM | 4230 | C   | ASP | 535 | -46.854 | 40.750 | 34.622 | 1.00       | 57.40 | C |
| ATOM | 4231 | O   | ASP | 535 | -46.628 | 41.913 | 34.291 | 1.00       | 57.40 | O |
| ATOM | 4232 | N   | THR | 536 | -46.233 | 39.705 | 34.042 | 1.00       | 93.23 | N |
| ATOM | 4233 | CA  | THR | 536 | -45.294 | 39.892 | 32.973 | 1.00       | 93.23 | C |
| ATOM | 4234 | CB  | THR | 536 | -44.154 | 38.916 | 33.018 | 1.00       | 93.23 | C |
| ATOM | 4235 | OG1 | THR | 536 | -43.455 | 39.035 | 34.248 | 1.00       | 93.23 | O |
| ATOM | 4236 | CG2 | THR | 536 | -43.208 | 39.198 | 31.841 | 1.00       | 93.23 | C |
| ATOM | 4237 | C   | THR | 536 | -46.050 | 39.625 | 31.715 | 1.00       | 93.23 | C |
| ATOM | 4238 | O   | THR | 536 | -46.859 | 38.700 | 31.649 | 1.00       | 93.23 | O |
| ATOM | 4239 | N   | ALA | 537 | -45.816 | 40.435 | 30.666 | 1.00287.17 |       | N |
| ATOM | 4240 | CA  | ALA | 537 | -46.576 | 40.211 | 29.474 | 1.00287.17 |       | C |
| ATOM | 4241 | CB  | ALA | 537 | -46.724 | 41.463 | 28.592 | 1.00287.17 |       | C |
| ATOM | 4242 | C   | ALA | 537 | -45.890 | 39.158 | 28.663 | 1.00287.17 |       | C |
| ATOM | 4243 | O   | ALA | 537 | -44.749 | 39.327 | 28.234 | 1.00287.17 |       | O |
| ATOM | 4244 | N   | GLY | 538 | -46.586 | 38.027 | 28.428 | 1.00189.84 |       | N |
| ATOM | 4245 | CA  | GLY | 538 | -46.055 | 36.986 | 27.594 | 1.00189.84 |       | C |
| ATOM | 4246 | C   | GLY | 538 | -44.785 | 36.447 | 28.178 | 1.00189.84 |       | C |
| ATOM | 4247 | O   | GLY | 538 | -43.727 | 36.530 | 27.560 | 1.00189.84 |       | O |
| ATOM | 4248 | N   | TRP | 539 | -44.867 | 35.839 | 29.372 | 1.00108.17 |       | N |
| ATOM | 4249 | CA  | TRP | 539 | -43.707 | 35.356 | 30.065 | 1.00108.17 |       | C |
| ATOM | 4250 | CB  | TRP | 539 | -44.066 | 34.635 | 31.375 | 1.00108.17 |       | C |
| ATOM | 4251 | CG  | TRP | 539 | -42.885 | 34.008 | 32.075 | 1.00108.17 |       | C |
| ATOM | 4252 | CD2 | TRP | 539 | -42.105 | 34.638 | 33.102 | 1.00108.17 |       | C |
| ATOM | 4253 | CD1 | TRP | 539 | -42.356 | 32.764 | 31.897 | 1.00108.17 |       | C |
| ATOM | 4254 | NE1 | TRP | 539 | -41.290 | 32.581 | 32.745 | 1.00108.17 |       | N |
| ATOM | 4255 | CE2 | TRP | 539 | -41.125 | 33.725 | 33.494 | 1.00108.17 |       | C |
| ATOM | 4256 | CE3 | TRP | 539 | -42.196 | 35.874 | 33.675 | 1.00108.17 |       | C |
| ATOM | 4257 | CZ2 | TRP | 539 | -40.219 | 34.034 | 34.467 | 1.00108.17 |       | C |
| ATOM | 4258 | CH3 | TRP | 539 | -41.280 | 36.183 | 34.656 | 1.00108.17 |       | C |
| ATOM | 4259 | CH2 | TRP | 539 | -40.310 | 35.282 | 35.043 | 1.00108.17 |       | C |
| ATOM | 4260 | C   | TRP | 539 | -42.920 | 34.370 | 29.240 | 1.00108.17 |       | C |
| ATOM | 4261 | O   | TRP | 539 | -41.700 | 34.481 | 29.149 | 1.00108.17 |       | O |
| ATOM | 4262 | N   | ASP | 540 | -43.587 | 33.394 | 28.596 | 1.00       | 87.64 | N |
| ATOM | 4263 | CA  | ASP | 540 | -42.908 | 32.336 | 27.883 | 1.00       | 87.64 | C |
| ATOM | 4264 | CB  | ASP | 540 | -43.892 | 31.335 | 27.253 | 1.00       | 87.64 | C |
| ATOM | 4265 | CG  | ASP | 540 | -44.587 | 30.583 | 28.380 | 1.00       | 87.64 | C |
| ATOM | 4266 | OD1 | ASP | 540 | -44.070 | 30.624 | 29.529 | 1.00       | 87.64 | O |
| ATOM | 4267 | OD2 | ASP | 540 | -45.646 | 29.957 | 28.109 | 1.00       | 87.64 | O |
| ATOM | 4268 | C   | ASP | 540 | -42.065 | 32.903 | 26.776 | 1.00       | 87.64 | C |
| ATOM | 4269 | O   | ASP | 540 | -41.014 | 32.351 | 26.450 | 1.00       | 87.64 | O |
| ATOM | 4270 | N   | THR | 541 | -42.530 | 33.992 | 26.138 | 1.00150.64 |       | N |
| ATOM | 4271 | CA  | THR | 541 | -41.846 | 34.631 | 25.042 | 1.00150.64 |       | C |
| ATOM | 4272 | CB  | THR | 541 | -42.698 | 35.616 | 24.290 | 1.00150.64 |       | C |
| ATOM | 4273 | OG1 | THR | 541 | -42.998 | 36.744 | 25.097 | 1.00150.64 |       | O |
| ATOM | 4274 | CG2 | THR | 541 | -43.999 | 34.911 | 23.872 | 1.00150.64 |       | C |
| ATOM | 4275 | C   | THR | 541 | -40.638 | 35.384 | 25.529 | 1.00150.64 |       | C |
| ATOM | 4276 | O   | THR | 541 | -39.756 | 35.727 | 24.746 | 1.00150.64 |       | O |
| ATOM | 4277 | N   | ARG | 542 | -40.656 | 35.770 | 26.816 | 1.00287.87 |       | N |
| ATOM | 4278 | CA  | ARG | 542 | -39.693 | 36.557 | 27.545 | 1.00287.87 |       | C |
| ATOM | 4279 | CB  | ARG | 542 | -40.273 | 37.061 | 28.873 | 1.00287.87 |       | C |
| ATOM | 4280 | CG  | ARG | 542 | -41.591 | 37.817 | 28.712 | 1.00287.87 |       | C |
| ATOM | 4281 | CD  | ARG | 542 | -41.429 | 39.328 | 28.574 | 1.00287.87 |       | C |
| ATOM | 4282 | NE  | ARG | 542 | -40.846 | 39.604 | 27.233 | 1.00287.87 |       | N |
| ATOM | 4283 | CZ  | ARG | 542 | -41.312 | 40.654 | 26.499 | 1.00287.87 |       | C |
| ATOM | 4284 | NH1 | ARG | 542 | -42.349 | 41.408 | 26.968 | 1.00287.87 |       | N |
| ATOM | 4285 | NH2 | ARG | 542 | -40.744 | 40.949 | 25.294 | 1.00287.87 |       | N |
| ATOM | 4286 | C   | ARG | 542 | -38.441 | 35.817 | 27.917 | 1.00287.87 |       | C |
| ATOM | 4287 | O   | ARG | 542 | -37.462 | 36.452 | 28.311 | 1.00287.87 |       | O |
| ATOM | 4288 | N   | ILE | 543 | -38.468 | 34.470 | 27.932 | 1.00136.45 |       | N |
| ATOM | 4289 | CA  | ILE | 543 | -37.327 | 33.732 | 28.410 | 1.00136.45 |       | C |
| ATOM | 4290 | CB  | ILE | 543 | -37.622 | 32.276 | 28.621 | 1.00136.45 |       | C |
| ATOM | 4291 | CG1 | ILE | 543 | -38.717 | 32.128 | 29.686 | 1.00136.45 |       | C |
| ATOM | 4292 | CG2 | ILE | 543 | -36.313 | 31.562 | 28.993 | 1.00136.45 |       | C |
| ATOM | 4293 | CD1 | ILE | 543 | -38.319 | 32.719 | 31.036 | 1.00136.45 |       | C |
| ATOM | 4294 | C   | ILE | 543 | -36.199 | 33.835 | 27.432 | 1.00136.45 |       | C |

|      |      |     |     |     |         |        |        |            |   |
|------|------|-----|-----|-----|---------|--------|--------|------------|---|
| ATOM | 4295 | O   | ILE | 543 | -36.312 | 33.423 | 26.278 | 1.00136.45 | O |
| ATOM | 4296 | N   | SER | 544 | -35.057 | 34.374 | 27.908 | 1.00 58.86 | N |
| ATOM | 4297 | CA  | SER | 544 | -33.907 | 34.588 | 27.078 | 1.00 58.86 | C |
| ATOM | 4298 | CB  | SER | 544 | -33.086 | 35.833 | 27.464 | 1.00 58.86 | C |
| ATOM | 4299 | OG  | SER | 544 | -32.570 | 35.698 | 28.780 | 1.00 58.86 | O |
| ATOM | 4300 | C   | SER | 544 | -33.006 | 33.397 | 27.130 | 1.00 58.86 | C |
| ATOM | 4301 | O   | SER | 544 | -33.230 | 32.442 | 27.875 | 1.00 58.86 | O |
| ATOM | 4302 | N   | LYS | 545 | -31.950 | 33.442 | 26.299 | 1.00 83.83 | N |
| ATOM | 4303 | CA  | LYS | 545 | -30.972 | 32.404 | 26.206 | 1.00 83.83 | C |
| ATOM | 4304 | CB  | LYS | 545 | -29.909 | 32.726 | 25.144 | 1.00 83.83 | C |
| ATOM | 4305 | CG  | LYS | 545 | -30.498 | 32.805 | 23.733 | 1.00 83.83 | C |
| ATOM | 4306 | CD  | LYS | 545 | -29.585 | 33.495 | 22.721 | 1.00 83.83 | C |
| ATOM | 4307 | CE  | LYS | 545 | -29.466 | 35.004 | 22.943 | 1.00 83.83 | C |
| ATOM | 4308 | NZ  | LYS | 545 | -28.477 | 35.574 | 22.002 | 1.00 83.83 | N |
| ATOM | 4309 | C   | LYS | 545 | -30.305 | 32.311 | 27.545 | 1.00 83.83 | C |
| ATOM | 4310 | O   | LYS | 545 | -29.960 | 31.225 | 28.008 | 1.00 83.83 | O |
| ATOM | 4311 | N   | PHE | 546 | -30.108 | 33.468 | 28.203 | 1.00 63.41 | N |
| ATOM | 4312 | CA  | PHE | 546 | -29.462 | 33.534 | 29.483 | 1.00 63.41 | C |
| ATOM | 4313 | CB  | PHE | 546 | -29.209 | 34.980 | 29.926 | 1.00 63.41 | C |
| ATOM | 4314 | CG  | PHE | 546 | -28.317 | 35.495 | 28.855 | 1.00 63.41 | C |
| ATOM | 4315 | CD1 | PHE | 546 | -28.865 | 36.011 | 27.706 | 1.00 63.41 | C |
| ATOM | 4316 | CD2 | PHE | 546 | -26.949 | 35.435 | 28.978 | 1.00 63.41 | C |
| ATOM | 4317 | CE1 | PHE | 546 | -28.058 | 36.478 | 26.699 | 1.00 63.41 | C |
| ATOM | 4318 | CE2 | PHE | 546 | -26.139 | 35.903 | 27.971 | 1.00 63.41 | C |
| ATOM | 4319 | CZ  | PHE | 546 | -26.691 | 36.429 | 26.829 | 1.00 63.41 | C |
| ATOM | 4320 | C   | PHE | 546 | -30.300 | 32.830 | 30.502 | 1.00 63.41 | C |
| ATOM | 4321 | O   | PHE | 546 | -29.779 | 32.143 | 31.379 | 1.00 63.41 | O |
| ATOM | 4322 | N   | ASP | 547 | -31.633 | 32.991 | 30.426 | 1.00 53.67 | N |
| ATOM | 4323 | CA  | ASP | 547 | -32.513 | 32.360 | 31.367 | 1.00 53.67 | C |
| ATOM | 4324 | CB  | ASP | 547 | -33.989 | 32.711 | 31.114 | 1.00 53.67 | C |
| ATOM | 4325 | CG  | ASP | 547 | -34.191 | 34.196 | 31.386 | 1.00 53.67 | C |
| ATOM | 4326 | OD1 | ASP | 547 | -33.252 | 34.841 | 31.921 | 1.00 53.67 | O |
| ATOM | 4327 | OD2 | ASP | 547 | -35.294 | 34.707 | 31.061 | 1.00 53.67 | O |
| ATOM | 4328 | C   | ASP | 547 | -32.384 | 30.871 | 31.219 | 1.00 53.67 | C |
| ATOM | 4329 | O   | ASP | 547 | -32.354 | 30.142 | 32.210 | 1.00 53.67 | O |
| ATOM | 4330 | N   | LEU | 548 | -32.304 | 30.381 | 29.966 | 1.00 55.55 | N |
| ATOM | 4331 | CA  | LEU | 548 | -32.233 | 28.972 | 29.701 | 1.00 55.55 | C |
| ATOM | 4332 | CB  | LEU | 548 | -32.254 | 28.643 | 28.195 | 1.00 55.55 | C |
| ATOM | 4333 | CG  | LEU | 548 | -33.541 | 29.108 | 27.483 | 1.00 55.55 | C |
| ATOM | 4334 | CD1 | LEU | 548 | -33.576 | 28.644 | 26.018 | 1.00 55.55 | C |
| ATOM | 4335 | CD2 | LEU | 548 | -34.796 | 28.701 | 28.269 | 1.00 55.55 | C |
| ATOM | 4336 | C   | LEU | 548 | -30.964 | 28.414 | 30.266 | 1.00 55.55 | C |
| ATOM | 4337 | O   | LEU | 548 | -30.957 | 27.332 | 30.853 | 1.00 55.55 | O |
| ATOM | 4338 | N   | GLU | 549 | -29.849 | 29.147 | 30.105 | 1.00 92.62 | N |
| ATOM | 4339 | CA  | GLU | 549 | -28.583 | 28.652 | 30.563 | 1.00 92.62 | C |
| ATOM | 4340 | CB  | GLU | 549 | -27.393 | 29.533 | 30.144 | 1.00 92.62 | C |
| ATOM | 4341 | CG  | GLU | 549 | -27.400 | 30.939 | 30.743 | 1.00 92.62 | C |
| ATOM | 4342 | CD  | GLU | 549 | -26.283 | 31.725 | 30.076 | 1.00 92.62 | C |
| ATOM | 4343 | OE1 | GLU | 549 | -25.659 | 31.172 | 29.130 | 1.00 92.62 | O |
| ATOM | 4344 | OE2 | GLU | 549 | -26.044 | 32.889 | 30.495 | 1.00 92.62 | O |
| ATOM | 4345 | C   | GLU | 549 | -28.596 | 28.531 | 32.055 | 1.00 92.62 | C |
| ATOM | 4346 | O   | GLU | 549 | -28.001 | 27.612 | 32.613 | 1.00 92.62 | O |
| ATOM | 4347 | N   | ASN | 550 | -29.262 | 29.470 | 32.748 | 1.00 58.25 | N |
| ATOM | 4348 | CA  | ASN | 550 | -29.298 | 29.435 | 34.184 | 1.00 58.25 | C |
| ATOM | 4349 | CB  | ASN | 550 | -29.902 | 30.703 | 34.806 | 1.00 58.25 | C |
| ATOM | 4350 | CG  | ASN | 550 | -28.853 | 31.797 | 34.665 | 1.00 58.25 | C |
| ATOM | 4351 | OD1 | ASN | 550 | -27.715 | 31.643 | 35.103 | 1.00 58.25 | O |
| ATOM | 4352 | ND2 | ASN | 550 | -29.237 | 32.931 | 34.024 | 1.00 58.25 | N |
| ATOM | 4353 | C   | ASN | 550 | -30.086 | 28.248 | 34.645 | 1.00 58.25 | C |
| ATOM | 4354 | O   | ASN | 550 | -29.769 | 27.643 | 35.668 | 1.00 58.25 | O |
| ATOM | 4355 | N   | GLU | 551 | -31.155 | 27.899 | 33.908 | 1.00 76.47 | N |
| ATOM | 4356 | CA  | GLU | 551 | -31.976 | 26.778 | 34.256 | 1.00 76.47 | C |
| ATOM | 4357 | CB  | GLU | 551 | -33.248 | 26.705 | 33.390 | 1.00 76.47 | C |
| ATOM | 4358 | CG  | GLU | 551 | -34.228 | 27.834 | 33.730 | 1.00 76.47 | C |
| ATOM | 4359 | CD  | GLU | 551 | -35.284 | 27.948 | 32.639 | 1.00 76.47 | C |
| ATOM | 4360 | OE1 | GLU | 551 | -35.227 | 27.152 | 31.664 | 1.00 76.47 | O |

|      |      |     |     |     |         |        |        |      |        |   |
|------|------|-----|-----|-----|---------|--------|--------|------|--------|---|
| ATOM | 4361 | OE2 | GLU | 551 | -36.161 | 28.845 | 32.767 | 1.00 | 76.47  | O |
| ATOM | 4362 | C   | GLU | 551 | -31.168 | 25.522 | 34.096 | 1.00 | 76.47  | C |
| ATOM | 4363 | O   | GLU | 551 | -31.367 | 24.549 | 34.820 | 1.00 | 76.47  | O |
| ATOM | 4364 | N   | ALA | 552 | -30.213 | 25.540 | 33.146 | 1.00 | 68.89  | N |
| ATOM | 4365 | CA  | ALA | 552 | -29.344 | 24.455 | 32.760 | 1.00 | 68.89  | C |
| ATOM | 4366 | CB  | ALA | 552 | -28.418 | 24.821 | 31.585 | 1.00 | 68.89  | C |
| ATOM | 4367 | C   | ALA | 552 | -28.467 | 23.999 | 33.899 | 1.00 | 68.89  | C |
| ATOM | 4368 | O   | ALA | 552 | -28.040 | 22.848 | 33.931 | 1.00 | 68.89  | O |
| ATOM | 4369 | N   | LEU | 553 | -28.162 | 24.887 | 34.859 | 1.00 | 130.80 | N |
| ATOM | 4370 | CA  | LEU | 553 | -27.238 | 24.630 | 35.935 | 1.00 | 130.80 | C |
| ATOM | 4371 | CB  | LEU | 553 | -27.039 | 25.811 | 36.903 | 1.00 | 130.80 | C |
| ATOM | 4372 | CG  | LEU | 553 | -26.189 | 26.962 | 36.334 | 1.00 | 130.80 | C |
| ATOM | 4373 | CD1 | LEU | 553 | -26.887 | 27.665 | 35.161 | 1.00 | 130.80 | C |
| ATOM | 4374 | CD2 | LEU | 553 | -25.751 | 27.928 | 37.448 | 1.00 | 130.80 | C |
| ATOM | 4375 | C   | LEU | 553 | -27.636 | 23.446 | 36.761 | 1.00 | 130.80 | C |
| ATOM | 4376 | O   | LEU | 553 | -26.805 | 22.905 | 37.483 | 1.00 | 130.80 | O |
| ATOM | 4377 | N   | ILE | 554 | -28.910 | 23.027 | 36.730 | 1.00 | 152.82 | N |
| ATOM | 4378 | CA  | ILE | 554 | -29.347 | 21.932 | 37.549 | 1.00 | 152.82 | C |
| ATOM | 4379 | CB  | ILE | 554 | -30.797 | 21.603 | 37.415 | 1.00 | 152.82 | C |
| ATOM | 4380 | CG1 | ILE | 554 | -31.153 | 20.574 | 38.499 | 1.00 | 152.82 | C |
| ATOM | 4381 | CG2 | ILE | 554 | -31.080 | 21.155 | 35.973 | 1.00 | 152.82 | C |
| ATOM | 4382 | CD1 | ILE | 554 | -32.641 | 20.470 | 38.793 | 1.00 | 152.82 | C |
| ATOM | 4383 | C   | ILE | 554 | -28.551 | 20.693 | 37.259 | 1.00 | 152.82 | C |
| ATOM | 4384 | O   | ILE | 554 | -28.363 | 19.846 | 38.131 | 1.00 | 152.82 | O |
| ATOM | 4385 | N   | THR | 555 | -28.066 | 20.542 | 36.021 | 1.00 | 161.21 | N |
| ATOM | 4386 | CA  | THR | 555 | -27.369 | 19.359 | 35.626 | 1.00 | 161.21 | C |
| ATOM | 4387 | CB  | THR | 555 | -26.932 | 19.391 | 34.201 | 1.00 | 161.21 | C |
| ATOM | 4388 | OG1 | THR | 555 | -26.317 | 18.158 | 33.891 | 1.00 | 161.21 | O |
| ATOM | 4389 | CG2 | THR | 555 | -25.948 | 20.545 | 33.977 | 1.00 | 161.21 | C |
| ATOM | 4390 | C   | THR | 555 | -26.171 | 19.115 | 36.500 | 1.00 | 161.21 | C |
| ATOM | 4391 | O   | THR | 555 | -25.764 | 17.967 | 36.675 | 1.00 | 161.21 | O |
| ATOM | 4392 | N   | ASN | 556 | -25.565 | 20.169 | 37.075 | 1.00 | 111.94 | N |
| ATOM | 4393 | CA  | ASN | 556 | -24.377 | 20.004 | 37.869 | 1.00 | 111.94 | C |
| ATOM | 4394 | CB  | ASN | 556 | -23.799 | 21.327 | 38.427 | 1.00 | 111.94 | C |
| ATOM | 4395 | CG  | ASN | 556 | -24.711 | 21.954 | 39.482 | 1.00 | 111.94 | C |
| ATOM | 4396 | OD1 | ASN | 556 | -25.916 | 21.717 | 39.530 | 1.00 | 111.94 | O |
| ATOM | 4397 | ND2 | ASN | 556 | -24.109 | 22.801 | 40.360 | 1.00 | 111.94 | N |
| ATOM | 4398 | C   | ASN | 556 | -24.668 | 19.095 | 39.026 | 1.00 | 111.94 | C |
| ATOM | 4399 | O   | ASN | 556 | -23.778 | 18.421 | 39.541 | 1.00 | 111.94 | O |
| ATOM | 4400 | N   | GLN | 557 | -25.921 | 19.111 | 39.498 | 1.00 | 146.61 | N |
| ATOM | 4401 | CA  | GLN | 557 | -26.413 | 18.358 | 40.611 | 1.00 | 146.61 | C |
| ATOM | 4402 | CB  | GLN | 557 | -27.765 | 18.929 | 41.071 | 1.00 | 146.61 | C |
| ATOM | 4403 | CG  | GLN | 557 | -28.206 | 18.497 | 42.464 | 1.00 | 146.61 | C |
| ATOM | 4404 | CD  | GLN | 557 | -29.231 | 19.526 | 42.923 | 1.00 | 146.61 | C |
| ATOM | 4405 | OE1 | GLN | 557 | -29.972 | 19.305 | 43.879 | 1.00 | 146.61 | O |
| ATOM | 4406 | NE2 | GLN | 557 | -29.265 | 20.698 | 42.233 | 1.00 | 146.61 | N |
| ATOM | 4407 | C   | GLN | 557 | -26.540 | 16.891 | 40.286 | 1.00 | 146.61 | C |
| ATOM | 4408 | O   | GLN | 557 | -26.500 | 16.052 | 41.182 | 1.00 | 146.61 | O |
| ATOM | 4409 | N   | MET | 558 | -26.745 | 16.550 | 38.999 | 1.00 | 88.82  | N |
| ATOM | 4410 | CA  | MET | 558 | -27.040 | 15.208 | 38.559 | 1.00 | 88.82  | C |
| ATOM | 4411 | CB  | MET | 558 | -27.749 | 15.201 | 37.200 | 1.00 | 88.82  | C |
| ATOM | 4412 | CG  | MET | 558 | -29.064 | 15.976 | 37.222 | 1.00 | 88.82  | C |
| ATOM | 4413 | SD  | MET | 558 | -29.844 | 16.166 | 35.594 | 1.00 | 88.82  | S |
| ATOM | 4414 | CE  | MET | 558 | -31.098 | 17.335 | 36.185 | 1.00 | 88.82  | C |
| ATOM | 4415 | C   | MET | 558 | -25.830 | 14.335 | 38.415 | 1.00 | 88.82  | C |
| ATOM | 4416 | O   | MET | 558 | -24.707 | 14.811 | 38.269 | 1.00 | 88.82  | O |
| ATOM | 4417 | N   | GLU | 559 | -26.059 | 12.999 | 38.462 | 1.00 | 128.37 | N |
| ATOM | 4418 | CA  | GLU | 559 | -25.011 | 12.031 | 38.283 | 1.00 | 128.37 | C |
| ATOM | 4419 | CB  | GLU | 559 | -25.252 | 10.674 | 38.980 | 1.00 | 128.37 | C |
| ATOM | 4420 | CG  | GLU | 559 | -26.496 | 9.909  | 38.522 | 1.00 | 128.37 | C |
| ATOM | 4421 | CD  | GLU | 559 | -26.449 | 8.526  | 39.165 | 1.00 | 128.37 | C |
| ATOM | 4422 | OE1 | GLU | 559 | -25.394 | 8.189  | 39.766 | 1.00 | 128.37 | O |
| ATOM | 4423 | OE2 | GLU | 559 | -27.464 | 7.786  | 39.061 | 1.00 | 128.37 | O |
| ATOM | 4424 | C   | GLU | 559 | -24.831 | 11.790 | 36.813 | 1.00 | 128.37 | C |
| ATOM | 4425 | O   | GLU | 559 | -25.663 | 12.195 | 36.006 | 1.00 | 128.37 | O |
| ATOM | 4426 | N   | GLU | 560 | -23.720 | 11.126 | 36.426 | 1.00 | 272.59 | N |

|      |      |     |     |     |         |        |        |            |   |
|------|------|-----|-----|-----|---------|--------|--------|------------|---|
| ATOM | 4427 | CA  | GLU | 560 | -23.437 | 10.888 | 35.037 | 1.00272.59 | C |
| ATOM | 4428 | CB  | GLU | 560 | -22.123 | 10.121 | 34.780 | 1.00272.59 | C |
| ATOM | 4429 | CG  | GLU | 560 | -22.067 | 8.715  | 35.387 | 1.00272.59 | C |
| ATOM | 4430 | CD  | GLU | 560 | -20.713 | 8.111  | 35.029 | 1.00272.59 | C |
| ATOM | 4431 | OE1 | GLU | 560 | -19.929 | 8.803  | 34.326 | 1.00272.59 | O |
| ATOM | 4432 | OE2 | GLU | 560 | -20.443 | 6.954  | 35.449 | 1.00272.59 | O |
| ATOM | 4433 | C   | GLU | 560 | -24.567 | 10.083 | 34.480 | 1.00272.59 | C |
| ATOM | 4434 | O   | GLU | 560 | -25.346 | 9.487  | 35.200 | 1.00272.59 | O |
| ATOM | 4435 | N   | GLY | 561 | -24.806 | 10.119 | 33.173 | 1.00220.57 | N |
| ATOM | 4436 | CA  | GLY | 561 | -25.867 | 9.280  | 32.692 | 1.00220.57 | C |
| ATOM | 4437 | C   | GLY | 561 | -27.145 | 10.053 | 32.833 | 1.00220.57 | C |
| ATOM | 4438 | O   | GLY | 561 | -27.857 | 10.266 | 31.855 | 1.00220.57 | O |
| ATOM | 4439 | N   | HIS | 562 | -27.470 | 10.483 | 34.074 | 1.0088.83  | N |
| ATOM | 4440 | CA  | HIS | 562 | -28.618 | 11.297 | 34.325 | 1.0088.83  | C |
| ATOM | 4441 | ND1 | HIS | 562 | -30.670 | 12.513 | 37.334 | 1.0088.83  | N |
| ATOM | 4442 | CG  | HIS | 562 | -30.185 | 12.227 | 36.078 | 1.0088.83  | C |
| ATOM | 4443 | CB  | HIS | 562 | -28.878 | 11.539 | 35.821 | 1.0088.83  | C |
| ATOM | 4444 | NE2 | HIS | 562 | -32.194 | 13.235 | 35.887 | 1.0088.83  | N |
| ATOM | 4445 | CD2 | HIS | 562 | -31.128 | 12.676 | 35.205 | 1.0088.83  | C |
| ATOM | 4446 | CE1 | HIS | 562 | -31.874 | 13.114 | 37.162 | 1.0088.83  | C |
| ATOM | 4447 | C   | HIS | 562 | -28.302 | 12.618 | 33.717 | 1.0088.83  | C |
| ATOM | 4448 | O   | HIS | 562 | -29.125 | 13.224 | 33.035 | 1.0088.83  | O |
| ATOM | 4449 | N   | ARG | 563 | -27.053 | 13.068 | 33.940 | 1.0081.95  | N |
| ATOM | 4450 | CA  | ARG | 563 | -26.581 | 14.331 | 33.457 | 1.0081.95  | C |
| ATOM | 4451 | CB  | ARG | 563 | -25.123 | 14.613 | 33.885 | 1.0081.95  | C |
| ATOM | 4452 | CG  | ARG | 563 | -24.549 | 15.950 | 33.402 | 1.0081.95  | C |
| ATOM | 4453 | CD  | ARG | 563 | -23.113 | 16.208 | 33.876 | 1.0081.95  | C |
| ATOM | 4454 | NE  | ARG | 563 | -22.720 | 17.578 | 33.433 | 1.0081.95  | N |
| ATOM | 4455 | CZ  | ARG | 563 | -22.162 | 18.445 | 34.329 | 1.0081.95  | C |
| ATOM | 4456 | NH1 | ARG | 563 | -21.985 | 18.063 | 35.628 | 1.0081.95  | N |
| ATOM | 4457 | NH2 | ARG | 563 | -21.792 | 19.699 | 33.932 | 1.0081.95  | N |
| ATOM | 4458 | C   | ARG | 563 | -26.618 | 14.293 | 31.963 | 1.0081.95  | C |
| ATOM | 4459 | O   | ARG | 563 | -26.990 | 15.275 | 31.325 | 1.0081.95  | O |
| ATOM | 4460 | N   | THR | 564 | -26.236 | 13.146 | 31.371 | 1.0050.61  | N |
| ATOM | 4461 | CA  | THR | 564 | -26.163 | 13.015 | 29.939 | 1.0050.61  | C |
| ATOM | 4462 | CB  | THR | 564 | -25.590 | 11.689 | 29.530 | 1.0050.61  | C |
| ATOM | 4463 | OG1 | THR | 564 | -24.305 | 11.518 | 30.108 | 1.0050.61  | O |
| ATOM | 4464 | CG2 | THR | 564 | -25.482 | 11.647 | 27.996 | 1.0050.61  | C |
| ATOM | 4465 | C   | THR | 564 | -27.532 | 13.136 | 29.331 | 1.0050.61  | C |
| ATOM | 4466 | O   | THR | 564 | -27.707 | 13.783 | 28.297 | 1.0050.61  | O |
| ATOM | 4467 | N   | LEU | 565 | -28.540 | 12.480 | 29.942 | 1.0073.95  | N |
| ATOM | 4468 | CA  | LEU | 565 | -29.879 | 12.537 | 29.416 | 1.0073.95  | C |
| ATOM | 4469 | CB  | LEU | 565 | -30.859 | 11.609 | 30.152 | 1.0073.95  | C |
| ATOM | 4470 | CG  | LEU | 565 | -30.644 | 10.112 | 29.871 | 1.0073.95  | C |
| ATOM | 4471 | CD1 | LEU | 565 | -31.661 | 9.259  | 30.641 | 1.0073.95  | C |
| ATOM | 4472 | CD2 | LEU | 565 | -30.680 | 9.818  | 28.362 | 1.0073.95  | C |
| ATOM | 4473 | C   | LEU | 565 | -30.420 | 13.926 | 29.557 | 1.0073.95  | C |
| ATOM | 4474 | O   | LEU | 565 | -31.062 | 14.446 | 28.645 | 1.0073.95  | O |
| ATOM | 4475 | N   | ALA | 566 | -30.184 | 14.554 | 30.728 | 1.0050.95  | N |
| ATOM | 4476 | CA  | ALA | 566 | -30.688 | 15.872 | 31.004 | 1.0050.95  | C |
| ATOM | 4477 | CB  | ALA | 566 | -30.355 | 16.353 | 32.427 | 1.0050.95  | C |
| ATOM | 4478 | C   | ALA | 566 | -30.075 | 16.859 | 30.058 | 1.0050.95  | C |
| ATOM | 4479 | O   | ALA | 566 | -30.757 | 17.754 | 29.562 | 1.0050.95  | O |
| ATOM | 4480 | N   | LEU | 567 | -28.764 | 16.730 | 29.777 | 1.00145.47 | N |
| ATOM | 4481 | CA  | LEU | 567 | -28.162 | 17.686 | 28.887 | 1.00145.47 | C |
| ATOM | 4482 | CB  | LEU | 567 | -26.638 | 17.546 | 28.683 | 1.00145.47 | C |
| ATOM | 4483 | CG  | LEU | 567 | -25.780 | 18.306 | 29.713 | 1.00145.47 | C |
| ATOM | 4484 | CD1 | LEU | 567 | -26.047 | 17.839 | 31.144 | 1.00145.47 | C |
| ATOM | 4485 | CD2 | LEU | 567 | -24.289 | 18.255 | 29.340 | 1.00145.47 | C |
| ATOM | 4486 | C   | LEU | 567 | -28.801 | 17.602 | 27.540 | 1.00145.47 | C |
| ATOM | 4487 | O   | LEU | 567 | -28.933 | 18.617 | 26.859 | 1.00145.47 | O |
| ATOM | 4488 | N   | ALA | 568 | -29.188 | 16.389 | 27.103 | 1.0054.97  | N |
| ATOM | 4489 | CA  | ALA | 568 | -29.774 | 16.247 | 25.798 | 1.0054.97  | C |
| ATOM | 4490 | CB  | ALA | 568 | -30.059 | 14.780 | 25.430 | 1.0054.97  | C |
| ATOM | 4491 | C   | ALA | 568 | -31.071 | 17.000 | 25.715 | 1.0054.97  | C |
| ATOM | 4492 | O   | ALA | 568 | -31.335 | 17.676 | 24.721 | 1.0054.97  | O |

|      |      |     |     |     |         |        |        |            |   |
|------|------|-----|-----|-----|---------|--------|--------|------------|---|
| ATOM | 4493 | N   | VAL | 569 | -31.930 | 16.904 | 26.751 | 1.00134.63 | N |
| ATOM | 4494 | CA  | VAL | 569 | -33.198 | 17.580 | 26.695 | 1.00134.63 | C |
| ATOM | 4495 | CB  | VAL | 569 | -34.094 | 17.259 | 27.860 | 1.00134.63 | C |
| ATOM | 4496 | CG1 | VAL | 569 | -34.363 | 15.745 | 27.843 | 1.00134.63 | C |
| ATOM | 4497 | CG2 | VAL | 569 | -33.465 | 17.773 | 29.163 | 1.00134.63 | C |
| ATOM | 4498 | C   | VAL | 569 | -32.944 | 19.063 | 26.666 | 1.00134.63 | C |
| ATOM | 4499 | O   | VAL | 569 | -33.540 | 19.782 | 25.869 | 1.00134.63 | O |
| ATOM | 4500 | N   | ILE | 570 | -32.037 | 19.574 | 27.523 | 1.00150.27 | N |
| ATOM | 4501 | CA  | ILE | 570 | -31.827 | 20.995 | 27.569 | 1.00150.27 | C |
| ATOM | 4502 | CB  | ILE | 570 | -31.052 | 21.422 | 28.792 | 1.00150.27 | C |
| ATOM | 4503 | CG1 | ILE | 570 | -29.649 | 20.810 | 28.861 | 1.00150.27 | C |
| ATOM | 4504 | CG2 | ILE | 570 | -31.901 | 21.040 | 30.013 | 1.00150.27 | C |
| ATOM | 4505 | CD1 | ILE | 570 | -28.875 | 21.287 | 30.091 | 1.00150.27 | C |
| ATOM | 4506 | C   | ILE | 570 | -31.207 | 21.530 | 26.307 | 1.00150.27 | C |
| ATOM | 4507 | O   | ILE | 570 | -31.691 | 22.514 | 25.748 | 1.00150.27 | O |
| ATOM | 4508 | N   | LYS | 571 | -30.118 | 20.905 | 25.821 | 1.00129.07 | N |
| ATOM | 4509 | CA  | LYS | 571 | -29.436 | 21.384 | 24.651 | 1.00129.07 | C |
| ATOM | 4510 | CB  | LYS | 571 | -28.093 | 20.664 | 24.440 | 1.00129.07 | C |
| ATOM | 4511 | CG  | LYS | 571 | -27.170 | 20.740 | 25.657 | 1.00129.07 | C |
| ATOM | 4512 | CD  | LYS | 571 | -26.834 | 22.167 | 26.085 | 1.00129.07 | C |
| ATOM | 4513 | CE  | LYS | 571 | -26.032 | 22.240 | 27.384 | 1.00129.07 | C |
| ATOM | 4514 | NZ  | LYS | 571 | -25.710 | 23.649 | 27.697 | 1.00129.07 | N |
| ATOM | 4515 | C   | LYS | 571 | -30.231 | 21.157 | 23.398 | 1.00129.07 | C |
| ATOM | 4516 | O   | LYS | 571 | -30.366 | 22.050 | 22.565 | 1.00129.07 | O |
| ATOM | 4517 | N   | TYR | 572 | -30.705 | 19.915 | 23.192 | 1.00121.11 | N |
| ATOM | 4518 | CA  | TYR | 572 | -31.411 | 19.568 | 21.986 | 1.00121.11 | C |
| ATOM | 4519 | CB  | TYR | 572 | -31.313 | 18.083 | 21.616 | 1.00121.11 | C |
| ATOM | 4520 | CG  | TYR | 572 | -29.951 | 17.949 | 21.035 | 1.00121.11 | C |
| ATOM | 4521 | CD1 | TYR | 572 | -29.760 | 18.239 | 19.705 | 1.00121.11 | C |
| ATOM | 4522 | CD2 | TYR | 572 | -28.874 | 17.573 | 21.800 | 1.00121.11 | C |
| ATOM | 4523 | CE1 | TYR | 572 | -28.516 | 18.141 | 19.131 | 1.00121.11 | C |
| ATOM | 4524 | CE2 | TYR | 572 | -27.626 | 17.472 | 21.232 | 1.00121.11 | C |
| ATOM | 4525 | CZ  | TYR | 572 | -27.446 | 17.754 | 19.898 | 1.00121.11 | C |
| ATOM | 4526 | OH  | TYR | 572 | -26.165 | 17.649 | 19.317 | 1.00121.11 | O |
| ATOM | 4527 | C   | TYR | 572 | -32.843 | 19.982 | 21.907 | 1.00121.11 | C |
| ATOM | 4528 | O   | TYR | 572 | -33.308 | 20.330 | 20.826 | 1.00121.11 | O |
| ATOM | 4529 | N   | THR | 573 | -33.608 | 19.775 | 22.994 | 1.00200.02 | N |
| ATOM | 4530 | CA  | THR | 573 | -35.023 | 20.048 | 23.025 | 1.00200.02 | C |
| ATOM | 4531 | CB  | THR | 573 | -35.692 | 19.080 | 23.954 | 1.00200.02 | C |
| ATOM | 4532 | OG1 | THR | 573 | -35.447 | 17.755 | 23.507 | 1.00200.02 | O |
| ATOM | 4533 | CG2 | THR | 573 | -37.200 | 19.331 | 23.980 | 1.00200.02 | C |
| ATOM | 4534 | C   | THR | 573 | -35.416 | 21.454 | 23.412 | 1.00200.02 | C |
| ATOM | 4535 | O   | THR | 573 | -36.331 | 22.017 | 22.815 | 1.00200.02 | O |
| ATOM | 4536 | N   | TYR | 574 | -34.835 | 22.014 | 24.501 | 1.00208.82 | N |
| ATOM | 4537 | CA  | TYR | 574 | -35.234 | 23.330 | 24.952 | 1.00208.82 | C |
| ATOM | 4538 | CB  | TYR | 574 | -34.919 | 23.647 | 26.418 | 1.00208.82 | C |
| ATOM | 4539 | CG  | TYR | 574 | -35.481 | 22.562 | 27.245 | 1.00208.82 | C |
| ATOM | 4540 | CD1 | TYR | 574 | -36.832 | 22.328 | 27.329 | 1.00208.82 | C |
| ATOM | 4541 | CD2 | TYR | 574 | -34.616 | 21.789 | 27.968 | 1.00208.82 | C |
| ATOM | 4542 | CE1 | TYR | 574 | -37.290 | 21.301 | 28.120 | 1.00208.82 | C |
| ATOM | 4543 | CE2 | TYR | 574 | -35.059 | 20.768 | 28.758 | 1.00208.82 | C |
| ATOM | 4544 | CZ  | TYR | 574 | -36.404 | 20.522 | 28.830 | 1.00208.82 | C |
| ATOM | 4545 | OH  | TYR | 574 | -36.866 | 19.468 | 29.642 | 1.00208.82 | O |
| ATOM | 4546 | C   | TYR | 574 | -34.565 | 24.464 | 24.222 | 1.00208.82 | C |
| ATOM | 4547 | O   | TYR | 574 | -35.191 | 25.468 | 23.891 | 1.00208.82 | O |
| ATOM | 4548 | N   | GLN | 575 | -33.229 | 24.372 | 24.069 | 1.00117.99 | N |
| ATOM | 4549 | CA  | GLN | 575 | -32.419 | 25.390 | 23.460 | 1.00117.99 | C |
| ATOM | 4550 | CB  | GLN | 575 | -30.922 | 25.185 | 23.720 | 1.00117.99 | C |
| ATOM | 4551 | CG  | GLN | 575 | -30.568 | 25.311 | 25.201 | 1.00117.99 | C |
| ATOM | 4552 | CD  | GLN | 575 | -29.071 | 25.091 | 25.340 | 1.00117.99 | C |
| ATOM | 4553 | OE1 | GLN | 575 | -28.375 | 24.827 | 24.360 | 1.00117.99 | O |
| ATOM | 4554 | NE2 | GLN | 575 | -28.561 | 25.202 | 26.595 | 1.00117.99 | N |
| ATOM | 4555 | C   | GLN | 575 | -32.624 | 25.398 | 21.983 | 1.00117.99 | C |
| ATOM | 4556 | O   | GLN | 575 | -32.541 | 26.442 | 21.341 | 1.00117.99 | O |
| ATOM | 4557 | N   | ASN | 576 | -32.817 | 24.213 | 21.385 | 1.00135.80 | N |
| ATOM | 4558 | CA  | ASN | 576 | -33.066 | 24.194 | 19.975 | 1.00135.80 | C |

|      |      |     |     |     |         |        |        |            |   |
|------|------|-----|-----|-----|---------|--------|--------|------------|---|
| ATOM | 4559 | CB  | ASN | 576 | -31.993 | 23.493 | 19.135 | 1.00135.80 | C |
| ATOM | 4560 | CG  | ASN | 576 | -30.912 | 24.529 | 18.892 | 1.00135.80 | C |
| ATOM | 4561 | OD1 | ASN | 576 | -31.206 | 25.701 | 18.663 | 1.00135.80 | O |
| ATOM | 4562 | ND2 | ASN | 576 | -29.628 | 24.094 | 18.938 | 1.00135.80 | N |
| ATOM | 4563 | C   | ASN | 576 | -34.361 | 23.506 | 19.722 | 1.00135.80 | C |
| ATOM | 4564 | O   | ASN | 576 | -34.458 | 22.283 | 19.672 | 1.00135.80 | O |
| ATOM | 4565 | N   | LYS | 577 | -35.414 | 24.295 | 19.488 | 1.00305.27 | N |
| ATOM | 4566 | CA  | LYS | 577 | -36.673 | 23.648 | 19.323 | 1.00305.27 | C |
| ATOM | 4567 | CB  | LYS | 577 | -37.802 | 24.336 | 20.124 | 1.00305.27 | C |
| ATOM | 4568 | CG  | LYS | 577 | -37.578 | 24.278 | 21.643 | 1.00305.27 | C |
| ATOM | 4569 | CD  | LYS | 577 | -38.544 | 25.116 | 22.491 | 1.00305.27 | C |
| ATOM | 4570 | CE  | LYS | 577 | -38.372 | 26.629 | 22.340 | 1.00305.27 | C |
| ATOM | 4571 | NZ  | LYS | 577 | -37.139 | 26.929 | 21.584 | 1.00305.27 | N |
| ATOM | 4572 | C   | LYS | 577 | -37.037 | 23.652 | 17.869 | 1.00305.27 | C |
| ATOM | 4573 | O   | LYS | 577 | -36.714 | 24.587 | 17.144 | 1.00305.27 | O |
| ATOM | 4574 | N   | VAL | 578 | -37.668 | 22.556 | 17.394 | 1.00269.99 | N |
| ATOM | 4575 | CA  | VAL | 578 | -38.176 | 22.505 | 16.052 | 1.00269.99 | C |
| ATOM | 4576 | CB  | VAL | 578 | -37.620 | 21.398 | 15.201 | 1.00269.99 | C |
| ATOM | 4577 | CG1 | VAL | 578 | -38.339 | 21.419 | 13.841 | 1.00269.99 | C |
| ATOM | 4578 | CG2 | VAL | 578 | -36.100 | 21.607 | 15.080 | 1.00269.99 | C |
| ATOM | 4579 | C   | VAL | 578 | -39.660 | 22.326 | 16.213 | 1.00269.99 | C |
| ATOM | 4580 | O   | VAL | 578 | -40.129 | 21.493 | 16.995 | 1.00269.99 | O |
| ATOM | 4581 | N   | VAL | 579 | -40.451 | 23.136 | 15.477 | 1.00350.34 | N |
| ATOM | 4582 | CA  | VAL | 579 | -41.861 | 23.119 | 15.746 | 1.00350.34 | C |
| ATOM | 4583 | CB  | VAL | 579 | -42.259 | 24.345 | 16.497 | 1.00350.34 | C |
| ATOM | 4584 | CG1 | VAL | 579 | -43.763 | 24.316 | 16.800 | 1.00350.34 | C |
| ATOM | 4585 | CG2 | VAL | 579 | -41.325 | 24.455 | 17.705 | 1.00350.34 | C |
| ATOM | 4586 | C   | VAL | 579 | -42.613 | 23.132 | 14.450 | 1.00350.34 | C |
| ATOM | 4587 | O   | VAL | 579 | -42.192 | 23.764 | 13.480 | 1.00350.34 | O |
| ATOM | 4588 | N   | LYS | 580 | -43.755 | 22.402 | 14.411 | 1.00480.57 | N |
| ATOM | 4589 | CA  | LYS | 580 | -44.595 | 22.432 | 13.245 | 1.00480.57 | C |
| ATOM | 4590 | CB  | LYS | 580 | -45.068 | 21.053 | 12.766 | 1.00480.57 | C |
| ATOM | 4591 | CG  | LYS | 580 | -43.989 | 20.248 | 12.039 | 1.00480.57 | C |
| ATOM | 4592 | CD  | LYS | 580 | -42.833 | 19.791 | 12.924 | 1.00480.57 | C |
| ATOM | 4593 | CE  | LYS | 580 | -41.978 | 18.706 | 12.267 | 1.00480.57 | C |
| ATOM | 4594 | NZ  | LYS | 580 | -41.187 | 19.270 | 11.162 | 1.00480.57 | N |
| ATOM | 4595 | C   | LYS | 580 | -45.811 | 23.259 | 13.552 | 1.00480.57 | C |
| ATOM | 4596 | O   | LYS | 580 | -46.420 | 23.112 | 14.604 | 1.00480.57 | O |
| ATOM | 4597 | N   | VAL | 581 | -46.191 | 24.172 | 12.633 | 1.00422.25 | N |
| ATOM | 4598 | CA  | VAL | 581 | -47.314 | 25.056 | 12.833 | 1.00422.25 | C |
| ATOM | 4599 | CB  | VAL | 581 | -46.898 | 26.418 | 13.317 | 1.00422.25 | C |
| ATOM | 4600 | CG1 | VAL | 581 | -45.487 | 26.729 | 12.818 | 1.00422.25 | C |
| ATOM | 4601 | CG2 | VAL | 581 | -47.879 | 27.441 | 12.741 | 1.00422.25 | C |
| ATOM | 4602 | C   | VAL | 581 | -48.094 | 25.228 | 11.559 | 1.00422.25 | C |
| ATOM | 4603 | O   | VAL | 581 | -47.530 | 25.411 | 10.484 | 1.00422.25 | O |
| ATOM | 4604 | N   | LEU | 582 | -49.440 | 25.184 | 11.662 | 1.00343.94 | N |
| ATOM | 4605 | CA  | LEU | 582 | -50.301 | 25.347 | 10.518 | 1.00343.94 | C |
| ATOM | 4606 | CB  | LEU | 582 | -51.713 | 24.765 | 10.725 | 1.00343.94 | C |
| ATOM | 4607 | CG  | LEU | 582 | -51.739 | 23.224 | 10.681 | 1.00343.94 | C |
| ATOM | 4608 | CD1 | LEU | 582 | -53.158 | 22.670 | 10.890 | 1.00343.94 | C |
| ATOM | 4609 | CD2 | LEU | 582 | -51.113 | 22.711 | 9.372  | 1.00343.94 | C |
| ATOM | 4610 | C   | LEU | 582 | -50.402 | 26.804 | 10.165 | 1.00343.94 | C |
| ATOM | 4611 | O   | LEU | 582 | -50.313 | 27.680 | 11.025 | 1.00343.94 | O |
| ATOM | 4612 | N   | ARG | 583 | -50.555 | 27.095 | 8.853  | 1.00344.93 | N |
| ATOM | 4613 | CA  | ARG | 583 | -50.650 | 28.451 | 8.400  | 1.00344.93 | C |
| ATOM | 4614 | CB  | ARG | 583 | -49.274 | 29.051 | 8.053  | 1.00344.93 | C |
| ATOM | 4615 | CG  | ARG | 583 | -49.324 | 30.440 | 7.417  | 1.00344.93 | C |
| ATOM | 4616 | CD  | ARG | 583 | -47.945 | 30.967 | 7.007  | 1.00344.93 | C |
| ATOM | 4617 | NE  | ARG | 583 | -47.255 | 29.872 | 6.265  | 1.00344.93 | N |
| ATOM | 4618 | CZ  | ARG | 583 | -46.638 | 30.114 | 5.070  | 1.00344.93 | C |
| ATOM | 4619 | NH1 | ARG | 583 | -46.679 | 31.357 | 4.511  | 1.00344.93 | N |
| ATOM | 4620 | NH2 | ARG | 583 | -45.982 | 29.105 | 4.427  | 1.00344.93 | N |
| ATOM | 4621 | C   | ARG | 583 | -51.462 | 28.474 | 7.142  | 1.00344.93 | C |
| ATOM | 4622 | O   | ARG | 583 | -51.386 | 27.548 | 6.335  | 1.00344.93 | O |
| ATOM | 4623 | N   | PRO | 584 | -52.257 | 29.508 | 6.968  | 1.00186.28 | N |
| ATOM | 4624 | CA  | PRO | 584 | -53.029 | 29.655 | 5.765  | 1.00186.28 | C |

|      |      |     |     |     |         |        |        |            |   |
|------|------|-----|-----|-----|---------|--------|--------|------------|---|
| ATOM | 4625 | CD  | PRO | 584 | -52.880 | 30.184 | 8.092  | 1.00186.28 | C |
| ATOM | 4626 | CB  | PRO | 584 | -54.145 | 30.660 | 6.081  | 1.00186.28 | C |
| ATOM | 4627 | CG  | PRO | 584 | -53.740 | 31.276 | 7.434  | 1.00186.28 | C |
| ATOM | 4628 | C   | PRO | 584 | -52.182 | 30.025 | 4.593  | 1.00186.28 | C |
| ATOM | 4629 | O   | PRO | 584 | -51.421 | 30.990 | 4.665  | 1.00186.28 | O |
| ATOM | 4630 | N   | ALA | 585 | -52.326 | 29.271 | 3.494  | 1.00313.26 | N |
| ATOM | 4631 | CA  | ALA | 585 | -51.637 | 29.495 | 2.260  | 1.00313.26 | C |
| ATOM | 4632 | CB  | ALA | 585 | -51.280 | 28.206 | 1.502  | 1.00313.26 | C |
| ATOM | 4633 | C   | ALA | 585 | -52.588 | 30.276 | 1.429  | 1.00313.26 | C |
| ATOM | 4634 | O   | ALA | 585 | -53.634 | 30.693 | 1.916  | 1.00313.26 | O |
| ATOM | 4635 | N   | GLU | 586 | -52.233 | 30.540 | 0.164  | 1.00 79.73 | N |
| ATOM | 4636 | CA  | GLU | 586 | -53.120 | 31.281 | -0.674 | 1.00 79.73 | C |
| ATOM | 4637 | CB  | GLU | 586 | -52.481 | 31.852 | -1.952 | 1.00 79.73 | C |
| ATOM | 4638 | CG  | GLU | 586 | -51.534 | 33.031 | -1.732 | 1.00 79.73 | C |
| ATOM | 4639 | CD  | GLU | 586 | -51.024 | 33.445 | -3.106 | 1.00 79.73 | C |
| ATOM | 4640 | OE1 | GLU | 586 | -50.390 | 32.592 | -3.782 | 1.00 79.73 | O |
| ATOM | 4641 | OE2 | GLU | 586 | -51.273 | 34.615 | -3.502 | 1.00 79.73 | O |
| ATOM | 4642 | C   | GLU | 586 | -54.225 | 30.394 | -1.134 | 1.00 79.73 | C |
| ATOM | 4643 | O   | GLU | 586 | -54.119 | 29.168 | -1.103 | 1.00 79.73 | O |
| ATOM | 4644 | N   | GLY | 587 | -55.353 | 31.033 | -1.510 | 1.00245.29 | N |
| ATOM | 4645 | CA  | GLY | 587 | -56.437 | 30.351 | -2.150 | 1.00245.29 | C |
| ATOM | 4646 | C   | GLY | 587 | -57.127 | 29.407 | -1.222 | 1.00245.29 | C |
| ATOM | 4647 | O   | GLY | 587 | -57.686 | 28.405 | -1.665 | 1.00245.29 | O |
| ATOM | 4648 | N   | GLY | 588 | -57.099 | 29.672 | 0.095  | 1.00 82.71 | N |
| ATOM | 4649 | CA  | GLY | 588 | -57.847 | 28.823 | 0.979  | 1.00 82.71 | C |
| ATOM | 4650 | C   | GLY | 588 | -57.107 | 27.545 | 1.258  | 1.00 82.71 | C |
| ATOM | 4651 | O   | GLY | 588 | -57.662 | 26.641 | 1.882  | 1.00 82.71 | O |
| ATOM | 4652 | N   | LYS | 589 | -55.843 | 27.413 | 0.815  | 1.00100.06 | N |
| ATOM | 4653 | CA  | LYS | 589 | -55.140 | 26.177 | 1.095  | 1.00100.06 | C |
| ATOM | 4654 | CB  | LYS | 589 | -54.141 | 25.764 | -0.004 | 1.00100.06 | C |
| ATOM | 4655 | CG  | LYS | 589 | -54.825 | 25.398 | -1.324 | 1.00100.06 | C |
| ATOM | 4656 | CD  | LYS | 589 | -53.874 | 25.179 | -2.504 | 1.00100.06 | C |
| ATOM | 4657 | CE  | LYS | 589 | -53.235 | 26.458 | -3.049 | 1.00100.06 | C |
| ATOM | 4658 | NZ  | LYS | 589 | -52.479 | 26.156 | -4.285 | 1.00100.06 | N |
| ATOM | 4659 | C   | LYS | 589 | -54.388 | 26.349 | 2.380  | 1.00100.06 | C |
| ATOM | 4660 | O   | LYS | 589 | -54.059 | 27.468 | 2.757  | 1.00100.06 | O |
| ATOM | 4661 | N   | THR | 590 | -54.106 | 25.247 | 3.111  | 1.00135.75 | N |
| ATOM | 4662 | CA  | THR | 590 | -53.404 | 25.386 | 4.362  | 1.00135.75 | C |
| ATOM | 4663 | CB  | THR | 590 | -54.249 | 25.031 | 5.555  | 1.00135.75 | C |
| ATOM | 4664 | OG1 | THR | 590 | -53.516 | 25.217 | 6.755  | 1.00135.75 | O |
| ATOM | 4665 | CG2 | THR | 590 | -54.736 | 23.583 | 5.433  | 1.00135.75 | C |
| ATOM | 4666 | C   | THR | 590 | -52.165 | 24.534 | 4.324  | 1.00135.75 | C |
| ATOM | 4667 | O   | THR | 590 | -52.133 | 23.489 | 3.677  | 1.00135.75 | O |
| ATOM | 4668 | N   | VAL | 591 | -51.093 | 24.976 | 5.021  | 1.00189.47 | N |
| ATOM | 4669 | CA  | VAL | 591 | -49.833 | 24.281 | 4.964  | 1.00189.47 | C |
| ATOM | 4670 | CB  | VAL | 591 | -48.818 | 25.020 | 4.140  | 1.00189.47 | C |
| ATOM | 4671 | CG1 | VAL | 591 | -49.277 | 25.042 | 2.675  | 1.00189.47 | C |
| ATOM | 4672 | CG2 | VAL | 591 | -48.668 | 26.427 | 4.739  | 1.00189.47 | C |
| ATOM | 4673 | C   | VAL | 591 | -49.248 | 24.162 | 6.344  | 1.00189.47 | C |
| ATOM | 4674 | O   | VAL | 591 | -49.649 | 24.872 | 7.265  | 1.00189.47 | O |
| ATOM | 4675 | N   | MET | 592 | -48.277 | 23.233 | 6.522  | 1.00231.03 | N |
| ATOM | 4676 | CA  | MET | 592 | -47.646 | 23.078 | 7.808  | 1.00231.03 | C |
| ATOM | 4677 | CB  | MET | 592 | -47.705 | 21.649 | 8.378  | 1.00231.03 | C |
| ATOM | 4678 | CG  | MET | 592 | -47.136 | 21.545 | 9.795  | 1.00231.03 | C |
| ATOM | 4679 | SD  | MET | 592 | -47.765 | 20.150 | 10.776 | 1.00231.03 | S |
| ATOM | 4680 | CE  | MET | 592 | -48.997 | 21.118 | 11.697 | 1.00231.03 | C |
| ATOM | 4681 | C   | MET | 592 | -46.217 | 23.528 | 7.690  | 1.00231.03 | C |
| ATOM | 4682 | O   | MET | 592 | -45.452 | 23.039 | 6.861  | 1.00231.03 | O |
| ATOM | 4683 | N   | ASP | 593 | -45.827 | 24.489 | 8.550  | 1.00180.70 | N |
| ATOM | 4684 | CA  | ASP | 593 | -44.529 | 25.115 | 8.505  | 1.00180.70 | C |
| ATOM | 4685 | CB  | ASP | 593 | -44.559 | 26.588 | 8.969  | 1.00180.70 | C |
| ATOM | 4686 | CG  | ASP | 593 | -45.464 | 27.433 | 8.078  | 1.00180.70 | C |
| ATOM | 4687 | OD1 | ASP | 593 | -45.500 | 27.198 | 6.845  | 1.00180.70 | O |
| ATOM | 4688 | OD2 | ASP | 593 | -46.144 | 28.336 | 8.631  | 1.00180.70 | O |
| ATOM | 4689 | C   | ASP | 593 | -43.608 | 24.439 | 9.484  | 1.00180.70 | C |
| ATOM | 4690 | O   | ASP | 593 | -44.040 | 24.012 | 10.552 | 1.00180.70 | O |

|      |      |     |     |     |         |        |        |            |   |
|------|------|-----|-----|-----|---------|--------|--------|------------|---|
| ATOM | 4691 | N   | ILE | 594 | -42.303 | 24.334 | 9.135  | 1.00228.86 | N |
| ATOM | 4692 | CA  | ILE | 594 | -41.295 | 23.778 | 10.009 | 1.00228.86 | C |
| ATOM | 4693 | CB  | ILE | 594 | -40.379 | 22.828 | 9.296  | 1.00228.86 | C |
| ATOM | 4694 | CG1 | ILE | 594 | -41.202 | 21.794 | 8.517  | 1.00228.86 | C |
| ATOM | 4695 | CG2 | ILE | 594 | -39.385 | 22.242 | 10.313 | 1.00228.86 | C |
| ATOM | 4696 | CD1 | ILE | 594 | -42.336 | 21.185 | 9.329  | 1.00228.86 | C |
| ATOM | 4697 | C   | ILE | 594 | -40.398 | 24.921 | 10.402 | 1.00228.86 | C |
| ATOM | 4698 | O   | ILE | 594 | -39.642 | 25.420 | 9.570  | 1.00228.86 | O |
| ATOM | 4699 | N   | ILE | 595 | -40.417 | 25.326 | 11.693 | 1.00129.89 | N |
| ATOM | 4700 | CA  | ILE | 595 | -39.686 | 26.484 | 12.150 | 1.00129.89 | C |
| ATOM | 4701 | CB  | ILE | 595 | -40.607 | 27.616 | 12.526 | 1.00129.89 | C |
| ATOM | 4702 | CG1 | ILE | 595 | -41.558 | 27.192 | 13.661 | 1.00129.89 | C |
| ATOM | 4703 | CG2 | ILE | 595 | -41.336 | 28.082 | 11.255 | 1.00129.89 | C |
| ATOM | 4704 | CD1 | ILE | 595 | -42.446 | 28.325 | 14.179 | 1.00129.89 | C |
| ATOM | 4705 | C   | ILE | 595 | -38.860 | 26.137 | 13.361 | 1.00129.89 | C |
| ATOM | 4706 | O   | ILE | 595 | -39.077 | 25.101 | 13.988 | 1.00129.89 | O |
| ATOM | 4707 | N   | SER | 596 | -37.853 | 26.992 | 13.685 | 1.00170.61 | N |
| ATOM | 4708 | CA  | SER | 596 | -36.984 | 26.771 | 14.822 | 1.00170.61 | C |
| ATOM | 4709 | CB  | SER | 596 | -35.656 | 26.086 | 14.458 | 1.00170.61 | C |
| ATOM | 4710 | OG  | SER | 596 | -35.883 | 24.796 | 13.918 | 1.00170.61 | O |
| ATOM | 4711 | C   | SER | 596 | -36.537 | 28.073 | 15.441 | 1.00170.61 | C |
| ATOM | 4712 | O   | SER | 596 | -36.457 | 29.100 | 14.768 | 1.00170.61 | O |
| ATOM | 4713 | N   | ARG | 597 | -36.242 | 28.061 | 16.768 | 1.00281.56 | N |
| ATOM | 4714 | CA  | ARG | 597 | -35.615 | 29.206 | 17.389 | 1.00281.56 | C |
| ATOM | 4715 | CB  | ARG | 597 | -36.513 | 30.398 | 17.778 | 1.00281.56 | C |
| ATOM | 4716 | CG  | ARG | 597 | -37.511 | 30.130 | 18.894 | 1.00281.56 | C |
| ATOM | 4717 | CD  | ARG | 597 | -37.846 | 31.391 | 19.695 | 1.00281.56 | C |
| ATOM | 4718 | NE  | ARG | 597 | -38.598 | 32.327 | 18.824 | 1.00281.56 | N |
| ATOM | 4719 | CZ  | ARG | 597 | -38.616 | 33.671 | 19.067 | 1.00281.56 | C |
| ATOM | 4720 | NH1 | ARG | 597 | -37.836 | 34.224 | 20.041 | 1.00281.56 | N |
| ATOM | 4721 | NH2 | ARG | 597 | -39.431 | 34.470 | 18.319 | 1.00281.56 | N |
| ATOM | 4722 | C   | ARG | 597 | -34.923 | 28.758 | 18.647 | 1.00281.56 | C |
| ATOM | 4723 | O   | ARG | 597 | -35.279 | 27.747 | 19.249 | 1.00281.56 | O |
| ATOM | 4724 | N   | GLN | 598 | -33.853 | 29.488 | 19.029 | 1.00143.28 | N |
| ATOM | 4725 | CA  | GLN | 598 | -33.032 | 29.161 | 20.164 | 1.00143.28 | C |
| ATOM | 4726 | CB  | GLN | 598 | -31.608 | 29.717 | 20.007 | 1.00143.28 | C |
| ATOM | 4727 | CG  | GLN | 598 | -30.976 | 29.141 | 18.734 | 1.00143.28 | C |
| ATOM | 4728 | CD  | GLN | 598 | -29.476 | 29.376 | 18.727 | 1.00143.28 | C |
| ATOM | 4729 | OE1 | GLN | 598 | -28.823 | 29.239 | 17.694 | 1.00143.28 | O |
| ATOM | 4730 | NE2 | GLN | 598 | -28.907 | 29.723 | 19.912 | 1.00143.28 | N |
| ATOM | 4731 | C   | GLN | 598 | -33.609 | 29.519 | 21.520 | 1.00143.28 | C |
| ATOM | 4732 | O   | GLN | 598 | -33.395 | 28.786 | 22.483 | 1.00143.28 | O |
| ATOM | 4733 | N   | ASP | 599 | -34.317 | 30.660 | 21.672 | 1.00145.78 | N |
| ATOM | 4734 | CA  | ASP | 599 | -34.789 | 31.047 | 22.985 | 1.00145.78 | C |
| ATOM | 4735 | CB  | ASP | 599 | -34.481 | 32.519 | 23.323 | 1.00145.78 | C |
| ATOM | 4736 | CG  | ASP | 599 | -35.112 | 33.419 | 22.272 | 1.00145.78 | C |
| ATOM | 4737 | OD1 | ASP | 599 | -35.923 | 32.907 | 21.457 | 1.00145.78 | O |
| ATOM | 4738 | OD2 | ASP | 599 | -34.777 | 34.633 | 22.261 | 1.00145.78 | O |
| ATOM | 4739 | C   | ASP | 599 | -36.262 | 30.761 | 23.183 | 1.00145.78 | C |
| ATOM | 4740 | O   | ASP | 599 | -36.839 | 29.932 | 22.484 | 1.00145.78 | O |
| ATOM | 4741 | N   | GLN | 600 | -36.898 | 31.417 | 24.191 | 1.00254.16 | N |
| ATOM | 4742 | CA  | GLN | 600 | -38.299 | 31.231 | 24.504 | 1.00254.16 | C |
| ATOM | 4743 | CB  | GLN | 600 | -39.279 | 31.235 | 23.316 | 1.00254.16 | C |
| ATOM | 4744 | CG  | GLN | 600 | -39.609 | 32.613 | 22.753 | 1.00254.16 | C |
| ATOM | 4745 | CD  | GLN | 600 | -40.862 | 32.460 | 21.900 | 1.00254.16 | C |
| ATOM | 4746 | OE1 | GLN | 600 | -41.315 | 31.351 | 21.622 | 1.00254.16 | O |
| ATOM | 4747 | NE2 | GLN | 600 | -41.448 | 33.612 | 21.480 | 1.00254.16 | N |
| ATOM | 4748 | C   | GLN | 600 | -38.511 | 29.913 | 25.169 | 1.00254.16 | C |
| ATOM | 4749 | O   | GLN | 600 | -37.608 | 29.080 | 25.226 | 1.00254.16 | O |
| ATOM | 4750 | N   | ARG | 601 | -39.735 | 29.703 | 25.705 | 1.00379.60 | N |
| ATOM | 4751 | CA  | ARG | 601 | -40.039 | 28.443 | 26.326 | 1.00379.60 | C |
| ATOM | 4752 | CB  | ARG | 601 | -40.358 | 28.540 | 27.826 | 1.00379.60 | C |
| ATOM | 4753 | CG  | ARG | 601 | -40.977 | 27.250 | 28.359 | 1.00379.60 | C |
| ATOM | 4754 | CD  | ARG | 601 | -40.702 | 26.962 | 29.833 | 1.00379.60 | C |
| ATOM | 4755 | NE  | ARG | 601 | -40.275 | 28.221 | 30.499 | 1.00379.60 | N |
| ATOM | 4756 | CZ  | ARG | 601 | -38.945 | 28.461 | 30.706 | 1.00379.60 | C |



|      |      |     |     |     |         |        |        |            |   |
|------|------|-----|-----|-----|---------|--------|--------|------------|---|
| ATOM | 4757 | NH1 | ARG | 601 | -38.007 | 27.594 | 30.225 | 1.00379.60 | N |
| ATOM | 4758 | NH2 | ARG | 601 | -38.551 | 29.561 | 31.412 | 1.00379.60 | N |
| ATOM | 4759 | C   | ARG | 601 | -41.203 | 27.784 | 25.635 | 1.00379.60 | C |
| ATOM | 4760 | O   | ARG | 601 | -42.145 | 28.448 | 25.212 | 1.00379.60 | O |
| ATOM | 4761 | N   | GLY | 602 | -41.148 | 26.441 | 25.469 | 1.00324.73 | N |
| ATOM | 4762 | CA  | GLY | 602 | -42.229 | 25.694 | 24.874 | 1.00324.73 | C |
| ATOM | 4763 | C   | GLY | 602 | -43.269 | 25.530 | 25.930 | 1.00324.73 | C |
| ATOM | 4764 | O   | GLY | 602 | -43.016 | 25.026 | 27.022 | 1.00324.73 | O |
| ATOM | 4765 | N   | SER | 603 | -44.507 | 25.893 | 25.597 | 1.00659.38 | N |
| ATOM | 4766 | CA  | SER | 603 | -45.554 | 25.898 | 26.570 | 1.00659.38 | C |
| ATOM | 4767 | CB  | SER | 603 | -46.883 | 26.381 | 25.967 | 1.00659.38 | C |
| ATOM | 4768 | OG  | SER | 603 | -46.693 | 27.621 | 25.306 | 1.00659.38 | O |
| ATOM | 4769 | C   | SER | 603 | -45.805 | 24.511 | 27.081 | 1.00659.38 | C |
| ATOM | 4770 | O   | SER | 603 | -46.106 | 24.326 | 28.261 | 1.00659.38 | O |
| ATOM | 4771 | N   | GLY | 604 | -45.676 | 23.475 | 26.231 | 1.00553.70 | N |
| ATOM | 4772 | CA  | GLY | 604 | -46.102 | 22.205 | 26.739 | 1.00553.70 | C |
| ATOM | 4773 | C   | GLY | 604 | -44.944 | 21.323 | 27.026 | 1.00553.70 | C |
| ATOM | 4774 | O   | GLY | 604 | -44.987 | 20.131 | 26.736 | 1.00553.70 | O |
| ATOM | 4775 | N   | GLN | 605 | -43.875 | 21.869 | 27.627 | 1.00390.71 | N |
| ATOM | 4776 | CA  | GLN | 605 | -42.840 | 20.975 | 28.021 | 1.00390.71 | C |
| ATOM | 4777 | CB  | GLN | 605 | -41.416 | 21.518 | 27.866 | 1.00390.71 | C |
| ATOM | 4778 | CG  | GLN | 605 | -41.117 | 22.800 | 28.615 | 1.00390.71 | C |
| ATOM | 4779 | CD  | GLN | 605 | -39.758 | 23.228 | 28.104 | 1.00390.71 | C |
| ATOM | 4780 | OE1 | GLN | 605 | -38.872 | 23.562 | 28.886 | 1.00390.71 | O |
| ATOM | 4781 | NE2 | GLN | 605 | -39.580 | 23.215 | 26.754 | 1.00390.71 | N |
| ATOM | 4782 | C   | GLN | 605 | -43.175 | 20.502 | 29.394 | 1.00390.71 | C |
| ATOM | 4783 | O   | GLN | 605 | -44.046 | 21.066 | 30.052 | 1.00390.71 | O |
| ATOM | 4784 | N   | VAL | 606 | -42.549 | 19.396 | 29.827 | 1.00242.06 | N |
| ATOM | 4785 | CA  | VAL | 606 | -42.836 | 18.794 | 31.103 | 1.00242.06 | C |
| ATOM | 4786 | CB  | VAL | 606 | -42.099 | 17.501 | 31.294 | 1.00242.06 | C |
| ATOM | 4787 | CG1 | VAL | 606 | -42.240 | 17.046 | 32.757 | 1.00242.06 | C |
| ATOM | 4788 | CG2 | VAL | 606 | -42.662 | 16.487 | 30.285 | 1.00242.06 | C |
| ATOM | 4789 | C   | VAL | 606 | -42.471 | 19.694 | 32.242 | 1.00242.06 | C |
| ATOM | 4790 | O   | VAL | 606 | -43.190 | 19.763 | 33.236 | 1.00242.06 | O |
| ATOM | 4791 | N   | VAL | 607 | -41.302 | 20.340 | 32.131 | 1.00223.05 | N |
| ATOM | 4792 | CA  | VAL | 607 | -40.648 | 21.220 | 33.059 | 1.00223.05 | C |
| ATOM | 4793 | CB  | VAL | 607 | -39.161 | 21.262 | 32.846 | 1.00223.05 | C |
| ATOM | 4794 | CG1 | VAL | 607 | -38.587 | 19.913 | 33.301 | 1.00223.05 | C |
| ATOM | 4795 | CG2 | VAL | 607 | -38.867 | 21.560 | 31.364 | 1.00223.05 | C |
| ATOM | 4796 | C   | VAL | 607 | -41.169 | 22.624 | 33.072 | 1.00223.05 | C |
| ATOM | 4797 | O   | VAL | 607 | -40.699 | 23.416 | 33.883 | 1.00223.05 | O |
| ATOM | 4798 | N   | THR | 608 | -42.090 | 23.001 | 32.165 | 1.00157.78 | N |
| ATOM | 4799 | CA  | THR | 608 | -42.476 | 24.381 | 31.990 | 1.00157.78 | C |
| ATOM | 4800 | CB  | THR | 608 | -43.705 | 24.532 | 31.138 | 1.00157.78 | C |
| ATOM | 4801 | OG1 | THR | 608 | -43.501 | 23.952 | 29.860 | 1.00157.78 | O |
| ATOM | 4802 | CG2 | THR | 608 | -44.030 | 26.030 | 30.996 | 1.00157.78 | C |
| ATOM | 4803 | C   | THR | 608 | -42.820 | 25.059 | 33.294 | 1.00157.78 | C |
| ATOM | 4804 | O   | THR | 608 | -42.255 | 26.104 | 33.615 | 1.00157.78 | O |
| ATOM | 4805 | N   | TYR | 609 | -43.734 | 24.482 | 34.095 | 1.00160.48 | N |
| ATOM | 4806 | CA  | TYR | 609 | -44.202 | 25.105 | 35.305 | 1.00160.48 | C |
| ATOM | 4807 | CB  | TYR | 609 | -45.285 | 24.234 | 35.977 | 1.00160.48 | C |
| ATOM | 4808 | CG  | TYR | 609 | -45.799 | 24.846 | 37.239 | 1.00160.48 | C |
| ATOM | 4809 | CD1 | TYR | 609 | -46.605 | 25.962 | 37.210 | 1.00160.48 | C |
| ATOM | 4810 | CD2 | TYR | 609 | -45.506 | 24.279 | 38.458 | 1.00160.48 | C |
| ATOM | 4811 | CE1 | TYR | 609 | -47.087 | 26.510 | 38.376 | 1.00160.48 | C |
| ATOM | 4812 | CE2 | TYR | 609 | -45.986 | 24.822 | 39.627 | 1.00160.48 | C |
| ATOM | 4813 | CZ  | TYR | 609 | -46.776 | 25.943 | 39.587 | 1.00160.48 | C |
| ATOM | 4814 | OH  | TYR | 609 | -47.269 | 26.502 | 40.785 | 1.00160.48 | O |
| ATOM | 4815 | C   | TYR | 609 | -43.061 | 25.297 | 36.268 | 1.00160.48 | C |
| ATOM | 4816 | O   | TYR | 609 | -42.931 | 26.356 | 36.882 | 1.00160.48 | O |
| ATOM | 4817 | N   | ALA | 610 | -42.212 | 24.266 | 36.434 | 1.00 54.82 | N |
| ATOM | 4818 | CA  | ALA | 610 | -41.121 | 24.308 | 37.371 | 1.00 54.82 | C |
| ATOM | 4819 | CB  | ALA | 610 | -40.398 | 22.955 | 37.485 | 1.00 54.82 | C |
| ATOM | 4820 | C   | ALA | 610 | -40.088 | 25.333 | 37.000 | 1.00 54.82 | C |
| ATOM | 4821 | O   | ALA | 610 | -39.674 | 26.134 | 37.837 | 1.00 54.82 | O |
| ATOM | 4822 | N   | LEU | 611 | -39.654 | 25.350 | 35.727 | 1.00 69.64 | N |

|      |      |     |     |     |         |        |        |      |       |   |
|------|------|-----|-----|-----|---------|--------|--------|------|-------|---|
| ATOM | 4823 | CA  | LEU | 611 | -38.616 | 26.244 | 35.295 | 1.00 | 69.64 | C |
| ATOM | 4824 | CB  | LEU | 611 | -38.104 | 25.955 | 33.875 | 1.00 | 69.64 | C |
| ATOM | 4825 | CG  | LEU | 611 | -37.323 | 24.628 | 33.793 | 1.00 | 69.64 | C |
| ATOM | 4826 | CD1 | LEU | 611 | -36.776 | 24.375 | 32.379 | 1.00 | 69.64 | C |
| ATOM | 4827 | CD2 | LEU | 611 | -36.232 | 24.560 | 34.877 | 1.00 | 69.64 | C |
| ATOM | 4828 | C   | LEU | 611 | -39.104 | 27.653 | 35.366 | 1.00 | 69.64 | C |
| ATOM | 4829 | O   | LEU | 611 | -38.334 | 28.561 | 35.674 | 1.00 | 69.64 | O |
| ATOM | 4830 | N   | ASN | 612 | -40.392 | 27.879 | 35.046 | 1.00 | 58.96 | N |
| ATOM | 4831 | CA  | ASN | 612 | -40.925 | 29.210 | 35.120 | 1.00 | 58.96 | C |
| ATOM | 4832 | CB  | ASN | 612 | -42.372 | 29.355 | 34.619 | 1.00 | 58.96 | C |
| ATOM | 4833 | CG  | ASN | 612 | -42.348 | 29.555 | 33.111 | 1.00 | 58.96 | C |
| ATOM | 4834 | OD1 | ASN | 612 | -41.289 | 29.722 | 32.508 | 1.00 | 58.96 | O |
| ATOM | 4835 | ND2 | ASN | 612 | -43.555 | 29.574 | 32.486 | 1.00 | 58.96 | N |
| ATOM | 4836 | C   | ASN | 612 | -40.913 | 29.673 | 36.541 | 1.00 | 58.96 | C |
| ATOM | 4837 | O   | ASN | 612 | -40.572 | 30.824 | 36.810 | 1.00 | 58.96 | O |
| ATOM | 4838 | N   | THR | 613 | -41.290 | 28.795 | 37.492 | 1.00 | 48.36 | N |
| ATOM | 4839 | CA  | THR | 613 | -41.326 | 29.216 | 38.862 | 1.00 | 48.36 | C |
| ATOM | 4840 | CB  | THR | 613 | -41.862 | 28.190 | 39.817 | 1.00 | 48.36 | C |
| ATOM | 4841 | OG1 | THR | 613 | -43.196 | 27.844 | 39.475 | 1.00 | 48.36 | O |
| ATOM | 4842 | CG2 | THR | 613 | -41.814 | 28.788 | 41.235 | 1.00 | 48.36 | C |
| ATOM | 4843 | C   | THR | 613 | -39.937 | 29.549 | 39.309 | 1.00 | 48.36 | C |
| ATOM | 4844 | O   | THR | 613 | -39.730 | 30.540 | 40.005 | 1.00 | 48.36 | O |
| ATOM | 4845 | N   | PHE | 614 | -38.945 | 28.729 | 38.909 | 1.00 | 69.27 | N |
| ATOM | 4846 | CA  | PHE | 614 | -37.579 | 28.917 | 39.314 | 1.00 | 69.27 | C |
| ATOM | 4847 | CB  | PHE | 614 | -36.659 | 27.834 | 38.713 | 1.00 | 69.27 | C |
| ATOM | 4848 | CG  | PHE | 614 | -35.248 | 28.060 | 39.144 | 1.00 | 69.27 | C |
| ATOM | 4849 | CD1 | PHE | 614 | -34.802 | 27.586 | 40.357 | 1.00 | 69.27 | C |
| ATOM | 4850 | CD2 | PHE | 614 | -34.363 | 28.731 | 38.332 | 1.00 | 69.27 | C |
| ATOM | 4851 | CE1 | PHE | 614 | -33.500 | 27.787 | 40.754 | 1.00 | 69.27 | C |
| ATOM | 4852 | CE2 | PHE | 614 | -33.060 | 28.934 | 38.723 | 1.00 | 69.27 | C |
| ATOM | 4853 | CZ  | PHE | 614 | -32.626 | 28.463 | 39.938 | 1.00 | 69.27 | C |
| ATOM | 4854 | C   | PHE | 614 | -37.079 | 30.250 | 38.838 | 1.00 | 69.27 | C |
| ATOM | 4855 | O   | PHE | 614 | -36.549 | 31.034 | 39.623 | 1.00 | 69.27 | O |
| ATOM | 4856 | N   | THR | 615 | -37.266 | 30.556 | 37.541 | 1.00 | 48.03 | N |
| ATOM | 4857 | CA  | THR | 615 | -36.761 | 31.768 | 36.957 | 1.00 | 48.03 | C |
| ATOM | 4858 | CB  | THR | 615 | -36.998 | 31.833 | 35.474 | 1.00 | 48.03 | C |
| ATOM | 4859 | OG1 | THR | 615 | -36.399 | 30.714 | 34.836 | 1.00 | 48.03 | O |
| ATOM | 4860 | CG2 | THR | 615 | -36.385 | 33.134 | 34.932 | 1.00 | 48.03 | C |
| ATOM | 4861 | C   | THR | 615 | -37.427 | 32.952 | 37.587 | 1.00 | 48.03 | C |
| ATOM | 4862 | O   | THR | 615 | -36.791 | 33.973 | 37.844 | 1.00 | 48.03 | O |
| ATOM | 4863 | N   | ASN | 616 | -38.742 | 32.848 | 37.846 | 1.00 | 67.11 | N |
| ATOM | 4864 | CA  | ASN | 616 | -39.501 | 33.933 | 38.397 | 1.00 | 67.11 | C |
| ATOM | 4865 | CB  | ASN | 616 | -40.996 | 33.599 | 38.458 | 1.00 | 67.11 | C |
| ATOM | 4866 | CG  | ASN | 616 | -41.741 | 34.916 | 38.442 | 1.00 | 67.11 | C |
| ATOM | 4867 | OD1 | ASN | 616 | -41.213 | 35.950 | 38.844 | 1.00 | 67.11 | O |
| ATOM | 4868 | ND2 | ASN | 616 | -43.017 | 34.883 | 37.972 | 1.00 | 67.11 | N |
| ATOM | 4869 | C   | ASN | 616 | -39.009 | 34.241 | 39.786 | 1.00 | 67.11 | C |
| ATOM | 4870 | O   | ASN | 616 | -38.910 | 35.408 | 40.167 | 1.00 | 67.11 | O |
| ATOM | 4871 | N   | LEU | 617 | -38.682 | 33.202 | 40.583 | 1.00 | 63.94 | N |
| ATOM | 4872 | CA  | LEU | 617 | -38.176 | 33.415 | 41.911 | 1.00 | 63.94 | C |
| ATOM | 4873 | CB  | LEU | 617 | -37.814 | 32.109 | 42.642 | 1.00 | 63.94 | C |
| ATOM | 4874 | CG  | LEU | 617 | -39.016 | 31.323 | 43.188 | 1.00 | 63.94 | C |
| ATOM | 4875 | CD1 | LEU | 617 | -38.573 | 29.988 | 43.808 | 1.00 | 63.94 | C |
| ATOM | 4876 | CD2 | LEU | 617 | -39.805 | 32.179 | 44.193 | 1.00 | 63.94 | C |
| ATOM | 4877 | C   | LEU | 617 | -36.903 | 34.194 | 41.806 | 1.00 | 63.94 | C |
| ATOM | 4878 | O   | LEU | 617 | -36.666 | 35.116 | 42.584 | 1.00 | 63.94 | O |
| ATOM | 4879 | N   | VAL | 618 | -36.044 | 33.835 | 40.838 | 1.00 | 37.49 | N |
| ATOM | 4880 | CA  | VAL | 618 | -34.783 | 34.500 | 40.665 | 1.00 | 37.49 | C |
| ATOM | 4881 | CB  | VAL | 618 | -33.948 | 33.890 | 39.579 | 1.00 | 37.49 | C |
| ATOM | 4882 | CG1 | VAL | 618 | -32.716 | 34.783 | 39.355 | 1.00 | 37.49 | C |
| ATOM | 4883 | CG2 | VAL | 618 | -33.602 | 32.446 | 39.979 | 1.00 | 37.49 | C |
| ATOM | 4884 | C   | VAL | 618 | -35.000 | 35.938 | 40.298 | 1.00 | 37.49 | C |
| ATOM | 4885 | O   | VAL | 618 | -34.326 | 36.822 | 40.824 | 1.00 | 37.49 | O |
| ATOM | 4886 | N   | VAL | 619 | -35.954 | 36.212 | 39.385 | 1.00 | 44.86 | N |
| ATOM | 4887 | CA  | VAL | 619 | -36.191 | 37.554 | 38.926 | 1.00 | 44.86 | C |
| ATOM | 4888 | CB  | VAL | 619 | -37.266 | 37.635 | 37.881 | 1.00 | 44.86 | C |

|      |      |         |     |         |        |        |      |        |   |
|------|------|---------|-----|---------|--------|--------|------|--------|---|
| ATOM | 4889 | CG1 VAL | 619 | -37.550 | 39.118 | 37.587 | 1.00 | 44.86  | C |
| ATOM | 4890 | CG2 VAL | 619 | -36.809 | 36.840 | 36.647 | 1.00 | 44.86  | C |
| ATOM | 4891 | C VAL   | 619 | -36.614 | 38.423 | 40.074 | 1.00 | 44.86  | C |
| ATOM | 4892 | O VAL   | 619 | -36.171 | 39.566 | 40.189 | 1.00 | 44.86  | O |
| ATOM | 4893 | N GLN   | 620 | -37.495 | 37.905 | 40.949 | 1.00 | 63.27  | N |
| ATOM | 4894 | CA GLN  | 620 | -38.012 | 38.664 | 42.055 | 1.00 | 63.27  | C |
| ATOM | 4895 | CB GLN  | 620 | -39.149 | 37.940 | 42.796 | 1.00 | 63.27  | C |
| ATOM | 4896 | CG GLN  | 620 | -40.361 | 37.678 | 41.898 | 1.00 | 63.27  | C |
| ATOM | 4897 | CD GLN  | 620 | -40.854 | 39.018 | 41.366 | 1.00 | 63.27  | C |
| ATOM | 4898 | OE1 GLN | 620 | -40.445 | 40.078 | 41.835 | 1.00 | 63.27  | O |
| ATOM | 4899 | NE2 GLN | 620 | -41.759 | 38.971 | 40.351 | 1.00 | 63.27  | N |
| ATOM | 4900 | C GLN   | 620 | -36.921 | 38.965 | 43.040 | 1.00 | 63.27  | C |
| ATOM | 4901 | O GLN   | 620 | -36.909 | 40.037 | 43.642 | 1.00 | 63.27  | O |
| ATOM | 4902 | N LEU   | 621 | -35.988 | 38.016 | 43.257 | 1.00 | 118.66 | N |
| ATOM | 4903 | CA LEU  | 621 | -34.913 | 38.245 | 44.182 | 1.00 | 118.66 | C |
| ATOM | 4904 | CB LEU  | 621 | -34.011 | 37.021 | 44.413 | 1.00 | 118.66 | C |
| ATOM | 4905 | CG LEU  | 621 | -34.539 | 36.048 | 45.484 | 1.00 | 118.66 | C |
| ATOM | 4906 | CD1 LEU | 621 | -35.967 | 35.575 | 45.192 | 1.00 | 118.66 | C |
| ATOM | 4907 | CD2 LEU | 621 | -33.567 | 34.878 | 45.682 | 1.00 | 118.66 | C |
| ATOM | 4908 | C LEU   | 621 | -34.047 | 39.369 | 43.707 | 1.00 | 118.66 | C |
| ATOM | 4909 | O LEU   | 621 | -33.604 | 40.193 | 44.506 | 1.00 | 118.66 | O |
| ATOM | 4910 | N ILE   | 622 | -33.765 | 39.431 | 42.394 | 1.00 | 55.82  | N |
| ATOM | 4911 | CA ILE  | 622 | -32.930 | 40.476 | 41.871 | 1.00 | 55.82  | C |
| ATOM | 4912 | CB ILE  | 622 | -32.570 | 40.287 | 40.433 | 1.00 | 55.82  | C |
| ATOM | 4913 | CG1 ILE | 622 | -31.705 | 39.022 | 40.304 | 1.00 | 55.82  | C |
| ATOM | 4914 | CG2 ILE | 622 | -31.867 | 41.563 | 39.939 | 1.00 | 55.82  | C |
| ATOM | 4915 | CD1 ILE | 622 | -31.543 | 38.535 | 38.873 | 1.00 | 55.82  | C |
| ATOM | 4916 | C ILE   | 622 | -33.608 | 41.798 | 42.041 | 1.00 | 55.82  | C |
| ATOM | 4917 | O ILE   | 622 | -32.963 | 42.793 | 42.373 | 1.00 | 55.82  | O |
| ATOM | 4918 | N ARG   | 623 | -34.931 | 41.856 | 41.809 | 1.00 | 151.79 | N |
| ATOM | 4919 | CA ARG  | 623 | -35.616 | 43.112 | 41.930 | 1.00 | 151.79 | C |
| ATOM | 4920 | CB ARG  | 623 | -37.081 | 43.082 | 41.464 | 1.00 | 151.79 | C |
| ATOM | 4921 | CG ARG  | 623 | -37.753 | 44.447 | 41.625 | 1.00 | 151.79 | C |
| ATOM | 4922 | CD ARG  | 623 | -38.749 | 44.804 | 40.519 | 1.00 | 151.79 | C |
| ATOM | 4923 | NE ARG  | 623 | -40.002 | 44.025 | 40.699 | 1.00 | 151.79 | N |
| ATOM | 4924 | CZ ARG  | 623 | -41.197 | 44.623 | 40.423 | 1.00 | 151.79 | C |
| ATOM | 4925 | NH1 ARG | 623 | -41.247 | 45.959 | 40.147 | 1.00 | 151.79 | N |
| ATOM | 4926 | NH2 ARG | 623 | -42.343 | 43.883 | 40.409 | 1.00 | 151.79 | N |
| ATOM | 4927 | C ARG   | 623 | -35.555 | 43.570 | 43.356 | 1.00 | 151.79 | C |
| ATOM | 4928 | O ARG   | 623 | -35.439 | 44.766 | 43.621 | 1.00 | 151.79 | O |
| ATOM | 4929 | N ASN   | 624 | -35.638 | 42.628 | 44.318 | 1.00 | 69.16  | N |
| ATOM | 4930 | CA ASN  | 624 | -35.597 | 42.987 | 45.706 | 1.00 | 69.16  | C |
| ATOM | 4931 | CB ASN  | 624 | -35.781 | 41.774 | 46.636 | 1.00 | 69.16  | C |
| ATOM | 4932 | CG ASN  | 624 | -36.063 | 42.286 | 48.042 | 1.00 | 69.16  | C |
| ATOM | 4933 | OD1 ASN | 624 | -35.782 | 43.438 | 48.369 | 1.00 | 69.16  | O |
| ATOM | 4934 | ND2 ASN | 624 | -36.635 | 41.403 | 48.903 | 1.00 | 69.16  | N |
| ATOM | 4935 | C ASN   | 624 | -34.256 | 43.596 | 46.008 | 1.00 | 69.16  | C |
| ATOM | 4936 | O ASN   | 624 | -34.169 | 44.566 | 46.761 | 1.00 | 69.16  | O |
| ATOM | 4937 | N MET   | 625 | -33.171 | 43.046 | 45.422 | 1.00 | 67.39  | N |
| ATOM | 4938 | CA MET  | 625 | -31.846 | 43.553 | 45.669 | 1.00 | 67.39  | C |
| ATOM | 4939 | CB MET  | 625 | -30.728 | 42.788 | 44.930 | 1.00 | 67.39  | C |
| ATOM | 4940 | CG MET  | 625 | -30.365 | 41.433 | 45.538 | 1.00 | 67.39  | C |
| ATOM | 4941 | SD MET  | 625 | -28.920 | 40.624 | 44.776 | 1.00 | 67.39  | S |
| ATOM | 4942 | CE MET  | 625 | -29.866 | 39.570 | 43.643 | 1.00 | 67.39  | C |
| ATOM | 4943 | C MET   | 625 | -31.752 | 44.970 | 45.201 | 1.00 | 67.39  | C |
| ATOM | 4944 | O MET   | 625 | -31.138 | 45.809 | 45.857 | 1.00 | 67.39  | O |
| ATOM | 4945 | N GLU   | 626 | -32.344 | 45.267 | 44.032 | 1.00 | 47.24  | N |
| ATOM | 4946 | CA GLU  | 626 | -32.310 | 46.595 | 43.489 | 1.00 | 47.24  | C |
| ATOM | 4947 | CB GLU  | 626 | -32.996 | 46.684 | 42.115 | 1.00 | 47.24  | C |
| ATOM | 4948 | CG GLU  | 626 | -32.953 | 48.078 | 41.487 | 1.00 | 47.24  | C |
| ATOM | 4949 | CD GLU  | 626 | -33.659 | 48.007 | 40.139 | 1.00 | 47.24  | C |
| ATOM | 4950 | OE1 GLU | 626 | -34.392 | 47.009 | 39.904 | 1.00 | 47.24  | O |
| ATOM | 4951 | OE2 GLU | 626 | -33.477 | 48.951 | 39.326 | 1.00 | 47.24  | O |
| ATOM | 4952 | C GLU   | 626 | -33.054 | 47.510 | 44.420 | 1.00 | 47.24  | C |
| ATOM | 4953 | O GLU   | 626 | -32.632 | 48.639 | 44.667 | 1.00 | 47.24  | O |
| ATOM | 4954 | N ALA   | 627 | -34.189 | 47.036 | 44.972 | 1.00 | 39.40  | N |

|      |      |     |     |     |         |        |        |            |       |   |
|------|------|-----|-----|-----|---------|--------|--------|------------|-------|---|
| ATOM | 4955 | CA  | ALA | 627 | -35.005 | 47.844 | 45.836 | 1.00       | 39.40 | C |
| ATOM | 4956 | CB  | ALA | 627 | -36.274 | 47.113 | 46.304 | 1.00       | 39.40 | C |
| ATOM | 4957 | C   | ALA | 627 | -34.219 | 48.210 | 47.061 | 1.00       | 39.40 | C |
| ATOM | 4958 | O   | ALA | 627 | -34.281 | 49.346 | 47.523 | 1.00       | 39.40 | O |
| ATOM | 4959 | N   | GLU | 628 | -33.457 | 47.250 | 47.613 | 1.00       | 91.82 | N |
| ATOM | 4960 | CA  | GLU | 628 | -32.661 | 47.404 | 48.803 | 1.00       | 91.82 | C |
| ATOM | 4961 | CB  | GLU | 628 | -32.210 | 46.068 | 49.415 | 1.00       | 91.82 | C |
| ATOM | 4962 | CG  | GLU | 628 | -33.394 | 45.317 | 50.029 | 1.00       | 91.82 | C |
| ATOM | 4963 | CD  | GLU | 628 | -32.900 | 44.029 | 50.666 | 1.00       | 91.82 | C |
| ATOM | 4964 | OE1 | GLU | 628 | -31.736 | 44.013 | 51.149 | 1.00       | 91.82 | O |
| ATOM | 4965 | OE2 | GLU | 628 | -33.684 | 43.045 | 50.682 | 1.00       | 91.82 | O |
| ATOM | 4966 | C   | GLU | 628 | -31.464 | 48.283 | 48.547 | 1.00       | 91.82 | C |
| ATOM | 4967 | O   | GLU | 628 | -30.799 | 48.723 | 49.485 | 1.00       | 91.82 | O |
| ATOM | 4968 | N   | GLU | 629 | -31.155 | 48.549 | 47.265 | 1.00130.28 |       | N |
| ATOM | 4969 | CA  | GLU | 629 | -30.036 | 49.345 | 46.824 | 1.00130.28 |       | C |
| ATOM | 4970 | CB  | GLU | 629 | -29.784 | 50.607 | 47.676 | 1.00130.28 |       | C |
| ATOM | 4971 | CG  | GLU | 629 | -28.819 | 51.593 | 47.004 | 1.00130.28 |       | C |
| ATOM | 4972 | CD  | GLU | 629 | -28.472 | 52.711 | 47.976 | 1.00130.28 |       | C |
| ATOM | 4973 | OE1 | GLU | 629 | -29.228 | 52.901 | 48.966 | 1.00130.28 |       | O |
| ATOM | 4974 | OE2 | GLU | 629 | -27.438 | 53.393 | 47.739 | 1.00130.28 |       | O |
| ATOM | 4975 | C   | GLU | 629 | -28.759 | 48.554 | 46.788 | 1.00130.28 |       | C |
| ATOM | 4976 | O   | GLU | 629 | -27.669 | 49.121 | 46.766 | 1.00130.28 |       | O |
| ATOM | 4977 | N   | VAL | 630 | -28.850 | 47.211 | 46.760 | 1.00       | 81.30 | N |
| ATOM | 4978 | CA  | VAL | 630 | -27.663 | 46.421 | 46.584 | 1.00       | 81.30 | C |
| ATOM | 4979 | CB  | VAL | 630 | -27.909 | 44.949 | 46.754 | 1.00       | 81.30 | C |
| ATOM | 4980 | CG1 | VAL | 630 | -26.626 | 44.182 | 46.388 | 1.00       | 81.30 | C |
| ATOM | 4981 | CG2 | VAL | 630 | -28.381 | 44.707 | 48.198 | 1.00       | 81.30 | C |
| ATOM | 4982 | C   | VAL | 630 | -27.148 | 46.644 | 45.190 | 1.00       | 81.30 | C |
| ATOM | 4983 | O   | VAL | 630 | -25.945 | 46.771 | 44.967 | 1.00       | 81.30 | O |
| ATOM | 4984 | N   | LEU | 631 | -28.061 | 46.693 | 44.201 | 1.00       | 92.26 | N |
| ATOM | 4985 | CA  | LEU | 631 | -27.674 | 46.856 | 42.827 | 1.00       | 92.26 | C |
| ATOM | 4986 | CB  | LEU | 631 | -28.231 | 45.746 | 41.920 | 1.00       | 92.26 | C |
| ATOM | 4987 | CG  | LEU | 631 | -27.785 | 44.322 | 42.310 | 1.00       | 92.26 | C |
| ATOM | 4988 | CD1 | LEU | 631 | -28.390 | 43.275 | 41.362 | 1.00       | 92.26 | C |
| ATOM | 4989 | CD2 | LEU | 631 | -26.256 | 44.215 | 42.415 | 1.00       | 92.26 | C |
| ATOM | 4990 | C   | LEU | 631 | -28.256 | 48.145 | 42.329 | 1.00       | 92.26 | C |
| ATOM | 4991 | O   | LEU | 631 | -29.340 | 48.551 | 42.744 | 1.00       | 92.26 | O |
| ATOM | 4992 | N   | GLU | 632 | -27.542 | 48.829 | 41.412 | 1.00122.31 |       | N |
| ATOM | 4993 | CA  | GLU | 632 | -28.029 | 50.079 | 40.902 | 1.00122.31 |       | C |
| ATOM | 4994 | CB  | GLU | 632 | -27.253 | 51.288 | 41.438 | 1.00122.31 |       | C |
| ATOM | 4995 | CG  | GLU | 632 | -27.354 | 51.453 | 42.955 | 1.00122.31 |       | C |
| ATOM | 4996 | CD  | GLU | 632 | -26.418 | 50.433 | 43.587 | 1.00122.31 |       | C |
| ATOM | 4997 | OE1 | GLU | 632 | -25.198 | 50.477 | 43.273 | 1.00122.31 |       | O |
| ATOM | 4998 | OE2 | GLU | 632 | -26.908 | 49.594 | 44.390 | 1.00122.31 |       | O |
| ATOM | 4999 | C   | GLU | 632 | -27.860 | 50.070 | 39.415 | 1.00122.31 |       | C |
| ATOM | 5000 | O   | GLU | 632 | -27.346 | 49.118 | 38.834 | 1.00122.31 |       | O |
| ATOM | 5001 | N   | MET | 633 | -28.276 | 51.173 | 38.769 | 1.00146.85 |       | N |
| ATOM | 5002 | CA  | MET | 633 | -28.254 | 51.318 | 37.342 | 1.00146.85 |       | C |
| ATOM | 5003 | CB  | MET | 633 | -28.766 | 52.704 | 36.899 | 1.00146.85 |       | C |
| ATOM | 5004 | CG  | MET | 633 | -28.789 | 52.931 | 35.383 | 1.00146.85 |       | C |
| ATOM | 5005 | SD  | MET | 633 | -27.167 | 53.214 | 34.609 | 1.00146.85 |       | S |
| ATOM | 5006 | CE  | MET | 633 | -26.988 | 54.919 | 35.212 | 1.00146.85 |       | C |
| ATOM | 5007 | C   | MET | 633 | -26.836 | 51.178 | 36.883 | 1.00146.85 |       | C |
| ATOM | 5008 | O   | MET | 633 | -26.582 | 50.657 | 35.800 | 1.00146.85 |       | O |
| ATOM | 5009 | N   | GLN | 634 | -25.879 | 51.658 | 37.695 | 1.00144.67 |       | N |
| ATOM | 5010 | CA  | GLN | 634 | -24.483 | 51.644 | 37.354 | 1.00144.67 |       | C |
| ATOM | 5011 | CB  | GLN | 634 | -23.628 | 52.297 | 38.452 | 1.00144.67 |       | C |
| ATOM | 5012 | CG  | GLN | 634 | -24.108 | 53.696 | 38.837 | 1.00144.67 |       | C |
| ATOM | 5013 | CD  | GLN | 634 | -25.292 | 53.537 | 39.781 | 1.00144.67 |       | C |
| ATOM | 5014 | OE1 | GLN | 634 | -26.427 | 53.858 | 39.435 | 1.00144.67 |       | O |
| ATOM | 5015 | NE2 | GLN | 634 | -25.021 | 53.026 | 41.011 | 1.00144.67 |       | N |
| ATOM | 5016 | C   | GLN | 634 | -23.996 | 50.228 | 37.202 | 1.00144.67 |       | C |
| ATOM | 5017 | O   | GLN | 634 | -23.207 | 49.929 | 36.306 | 1.00144.67 |       | O |
| ATOM | 5018 | N   | ASP | 635 | -24.449 | 49.318 | 38.085 | 1.00126.71 |       | N |
| ATOM | 5019 | CA  | ASP | 635 | -24.005 | 47.948 | 38.100 | 1.00126.71 |       | C |
| ATOM | 5020 | CB  | ASP | 635 | -24.455 | 47.174 | 39.350 | 1.00126.71 |       | C |

|      |      |     |     |     |         |        |        |            |   |
|------|------|-----|-----|-----|---------|--------|--------|------------|---|
| ATOM | 5021 | CG  | ASP | 635 | -23.542 | 47.575 | 40.501 | 1.00126.71 | C |
| ATOM | 5022 | OD1 | ASP | 635 | -22.613 | 48.393 | 40.275 | 1.00126.71 | O |
| ATOM | 5023 | OD2 | ASP | 635 | -23.755 | 47.054 | 41.628 | 1.00126.71 | O |
| ATOM | 5024 | C   | ASP | 635 | -24.463 | 47.175 | 36.899 | 1.00126.71 | C |
| ATOM | 5025 | O   | ASP | 635 | -23.798 | 46.225 | 36.488 | 1.00126.71 | O |
| ATOM | 5026 | N   | LEU | 636 | -25.616 | 47.534 | 36.310 | 1.00109.56 | N |
| ATOM | 5027 | CA  | LEU | 636 | -26.144 | 46.754 | 35.223 | 1.00109.56 | C |
| ATOM | 5028 | CB  | LEU | 636 | -27.532 | 47.210 | 34.742 | 1.00109.56 | C |
| ATOM | 5029 | CG  | LEU | 636 | -28.636 | 46.804 | 35.727 | 1.00109.56 | C |
| ATOM | 5030 | CD1 | LEU | 636 | -30.035 | 47.176 | 35.218 | 1.00109.56 | C |
| ATOM | 5031 | CD2 | LEU | 636 | -28.516 | 45.313 | 36.064 | 1.00109.56 | C |
| ATOM | 5032 | C   | LEU | 636 | -25.228 | 46.707 | 34.031 | 1.00109.56 | C |
| ATOM | 5033 | O   | LEU | 636 | -25.139 | 45.659 | 33.394 | 1.00109.56 | O |
| ATOM | 5034 | N   | TRP | 637 | -24.563 | 47.819 | 33.648 | 1.00134.10 | N |
| ATOM | 5035 | CA  | TRP | 637 | -23.698 | 47.752 | 32.492 | 1.00134.10 | C |
| ATOM | 5036 | CB  | TRP | 637 | -23.128 | 49.110 | 32.036 | 1.00134.10 | C |
| ATOM | 5037 | CG  | TRP | 637 | -22.349 | 49.029 | 30.737 | 1.00134.10 | C |
| ATOM | 5038 | CD2 | TRP | 637 | -20.914 | 49.048 | 30.612 | 1.00134.10 | C |
| ATOM | 5039 | CD1 | TRP | 637 | -22.840 | 48.939 | 29.467 | 1.00134.10 | C |
| ATOM | 5040 | NE1 | TRP | 637 | -21.807 | 48.894 | 28.561 | 1.00134.10 | N |
| ATOM | 5041 | CE2 | TRP | 637 | -20.617 | 48.963 | 29.251 | 1.00134.10 | C |
| ATOM | 5042 | CE3 | TRP | 637 | -19.925 | 49.133 | 31.551 | 1.00134.10 | C |
| ATOM | 5043 | CZ2 | TRP | 637 | -19.324 | 48.960 | 28.807 | 1.00134.10 | C |
| ATOM | 5044 | CZ3 | TRP | 637 | -18.623 | 49.128 | 31.098 | 1.00134.10 | C |
| ATOM | 5045 | CH2 | TRP | 637 | -18.327 | 49.043 | 29.753 | 1.00134.10 | C |
| ATOM | 5046 | C   | TRP | 637 | -22.521 | 46.870 | 32.786 | 1.00134.10 | C |
| ATOM | 5047 | O   | TRP | 637 | -22.182 | 45.984 | 32.002 | 1.00134.10 | O |
| ATOM | 5048 | N   | LEU | 638 | -21.840 | 47.113 | 33.922 | 1.00 74.32 | N |
| ATOM | 5049 | CA  | LEU | 638 | -20.726 | 46.296 | 34.310 | 1.00 74.32 | C |
| ATOM | 5050 | CB  | LEU | 638 | -19.355 | 46.920 | 33.965 | 1.00 74.32 | C |
| ATOM | 5051 | CG  | LEU | 638 | -18.113 | 46.029 | 34.213 | 1.00 74.32 | C |
| ATOM | 5052 | CD1 | LEU | 638 | -16.839 | 46.724 | 33.705 | 1.00 74.32 | C |
| ATOM | 5053 | CD2 | LEU | 638 | -17.959 | 45.605 | 35.684 | 1.00 74.32 | C |
| ATOM | 5054 | C   | LEU | 638 | -20.841 | 46.151 | 35.791 | 1.00 74.32 | C |
| ATOM | 5055 | O   | LEU | 638 | -21.096 | 47.123 | 36.497 | 1.00 74.32 | O |
| ATOM | 5056 | N   | LEU | 639 | -20.657 | 44.922 | 36.308 | 1.00 91.32 | N |
| ATOM | 5057 | CA  | LEU | 639 | -20.795 | 44.738 | 37.722 | 1.00 91.32 | C |
| ATOM | 5058 | CB  | LEU | 639 | -21.456 | 43.392 | 38.074 | 1.00 91.32 | C |
| ATOM | 5059 | CG  | LEU | 639 | -21.658 | 43.139 | 39.579 | 1.00 91.32 | C |
| ATOM | 5060 | CD1 | LEU | 639 | -22.719 | 44.082 | 40.167 | 1.00 91.32 | C |
| ATOM | 5061 | CD2 | LEU | 639 | -21.962 | 41.658 | 39.858 | 1.00 91.32 | C |
| ATOM | 5062 | C   | LEU | 639 | -19.413 | 44.731 | 38.299 | 1.00 91.32 | C |
| ATOM | 5063 | O   | LEU | 639 | -18.532 | 44.004 | 37.839 | 1.00 91.32 | O |
| ATOM | 5064 | N   | ARG | 640 | -19.192 | 45.564 | 39.334 | 1.00463.09 | N |
| ATOM | 5065 | CA  | ARG | 640 | -17.914 | 45.642 | 39.987 | 1.00463.09 | C |
| ATOM | 5066 | CB  | ARG | 640 | -17.762 | 46.875 | 40.901 | 1.00463.09 | C |
| ATOM | 5067 | CG  | ARG | 640 | -16.345 | 47.098 | 41.443 | 1.00463.09 | C |
| ATOM | 5068 | CD  | ARG | 640 | -15.343 | 47.589 | 40.392 | 1.00463.09 | C |
| ATOM | 5069 | NE  | ARG | 640 | -14.033 | 47.791 | 41.076 | 1.00463.09 | N |
| ATOM | 5070 | CZ  | ARG | 640 | -12.871 | 47.782 | 40.358 | 1.00463.09 | C |
| ATOM | 5071 | NH1 | ARG | 640 | -12.902 | 47.584 | 39.008 | 1.00463.09 | N |
| ATOM | 5072 | NH2 | ARG | 640 | -11.676 | 47.969 | 40.992 | 1.00463.09 | N |
| ATOM | 5073 | C   | ARG | 640 | -17.818 | 44.415 | 40.831 | 1.00463.09 | C |
| ATOM | 5074 | O   | ARG | 640 | -18.746 | 43.611 | 40.838 | 1.00463.09 | O |
| ATOM | 5075 | N   | LYS | 641 | -16.679 | 44.170 | 41.510 | 1.00361.13 | N |
| ATOM | 5076 | CA  | LYS | 641 | -16.686 | 42.969 | 42.293 | 1.00361.13 | C |
| ATOM | 5077 | CB  | LYS | 641 | -15.547 | 41.988 | 41.972 | 1.00361.13 | C |
| ATOM | 5078 | CG  | LYS | 641 | -15.730 | 40.632 | 42.658 | 1.00361.13 | C |
| ATOM | 5079 | CD  | LYS | 641 | -16.881 | 39.788 | 42.095 | 1.00361.13 | C |
| ATOM | 5080 | CE  | LYS | 641 | -18.251 | 40.475 | 42.129 | 1.00361.13 | C |
| ATOM | 5081 | NZ  | LYS | 641 | -19.318 | 39.474 | 41.894 | 1.00361.13 | N |
| ATOM | 5082 | C   | LYS | 641 | -16.612 | 43.289 | 43.756 | 1.00361.13 | C |
| ATOM | 5083 | O   | LYS | 641 | -15.558 | 43.589 | 44.321 | 1.00361.13 | O |
| ATOM | 5084 | N   | PRO | 642 | -17.788 | 43.279 | 44.327 | 1.00443.68 | N |
| ATOM | 5085 | CA  | PRO | 642 | -17.983 | 43.367 | 45.746 | 1.00443.68 | C |
| ATOM | 5086 | CD  | PRO | 642 | -18.926 | 43.838 | 43.618 | 1.00443.68 | C |

|      |      |     |     |     |         |        |        |            |   |
|------|------|-----|-----|-----|---------|--------|--------|------------|---|
| ATOM | 5087 | CB  | PRO | 642 | -19.236 | 44.213 | 45.963 | 1.00443.68 | C |
| ATOM | 5088 | CG  | PRO | 642 | -20.030 | 44.023 | 44.663 | 1.00443.68 | C |
| ATOM | 5089 | C   | PRO | 642 | -18.235 | 41.953 | 46.182 | 1.00443.68 | C |
| ATOM | 5090 | O   | PRO | 642 | -18.044 | 41.040 | 45.387 | 1.00443.68 | O |
| ATOM | 5091 | N   | GLU | 643 | -18.525 | 41.753 | 47.475 | 1.00145.94 | N |
| ATOM | 5092 | CA  | GLU | 643 | -19.019 | 40.566 | 48.120 | 1.00145.94 | C |
| ATOM | 5093 | CB  | GLU | 643 | -18.615 | 40.509 | 49.604 | 1.00145.94 | C |
| ATOM | 5094 | CG  | GLU | 643 | -17.103 | 40.463 | 49.825 | 1.00145.94 | C |
| ATOM | 5095 | CD  | GLU | 643 | -16.605 | 39.124 | 49.311 | 1.00145.94 | C |
| ATOM | 5096 | OE1 | GLU | 643 | -17.099 | 38.078 | 49.813 | 1.00145.94 | O |
| ATOM | 5097 | OE2 | GLU | 643 | -15.729 | 39.127 | 48.405 | 1.00145.94 | O |
| ATOM | 5098 | C   | GLU | 643 | -20.511 | 40.615 | 48.104 | 1.00145.94 | C |
| ATOM | 5099 | O   | GLU | 643 | -21.190 | 39.604 | 48.275 | 1.00145.94 | O |
| ATOM | 5100 | N   | LYS | 644 | -21.039 | 41.830 | 47.879 | 1.00204.63 | N |
| ATOM | 5101 | CA  | LYS | 644 | -22.386 | 42.228 | 48.169 | 1.00204.63 | C |
| ATOM | 5102 | CB  | LYS | 644 | -22.733 | 43.579 | 47.514 | 1.00204.63 | C |
| ATOM | 5103 | CG  | LYS | 644 | -22.168 | 44.812 | 48.218 | 1.00204.63 | C |
| ATOM | 5104 | CD  | LYS | 644 | -22.838 | 45.100 | 49.561 | 1.00204.63 | C |
| ATOM | 5105 | CE  | LYS | 644 | -24.258 | 45.652 | 49.415 | 1.00204.63 | C |
| ATOM | 5106 | NZ  | LYS | 644 | -25.187 | 44.570 | 49.015 | 1.00204.63 | N |
| ATOM | 5107 | C   | LYS | 644 | -23.448 | 41.285 | 47.691 | 1.00204.63 | C |
| ATOM | 5108 | O   | LYS | 644 | -24.314 | 40.917 | 48.482 | 1.00204.63 | O |
| ATOM | 5109 | N   | VAL | 645 | -23.456 | 40.858 | 46.417 | 1.00128.83 | N |
| ATOM | 5110 | CA  | VAL | 645 | -24.578 | 40.042 | 46.033 | 1.00128.83 | C |
| ATOM | 5111 | CB  | VAL | 645 | -24.637 | 39.720 | 44.566 | 1.00128.83 | C |
| ATOM | 5112 | CG1 | VAL | 645 | -24.981 | 41.000 | 43.794 | 1.00128.83 | C |
| ATOM | 5113 | CG2 | VAL | 645 | -23.305 | 39.096 | 44.138 | 1.00128.83 | C |
| ATOM | 5114 | C   | VAL | 645 | -24.585 | 38.758 | 46.795 | 1.00128.83 | C |
| ATOM | 5115 | O   | VAL | 645 | -25.625 | 38.337 | 47.302 | 1.00128.83 | O |
| ATOM | 5116 | N   | THR | 646 | -23.416 | 38.109 | 46.913 | 1.00 49.74 | N |
| ATOM | 5117 | CA  | THR | 646 | -23.316 | 36.834 | 47.557 | 1.00 49.74 | C |
| ATOM | 5118 | CB  | THR | 646 | -21.931 | 36.267 | 47.450 | 1.00 49.74 | C |
| ATOM | 5119 | OG1 | THR | 646 | -21.559 | 36.157 | 46.084 | 1.00 49.74 | O |
| ATOM | 5120 | CG2 | THR | 646 | -21.909 | 34.879 | 48.112 | 1.00 49.74 | C |
| ATOM | 5121 | C   | THR | 646 | -23.668 | 36.965 | 49.008 | 1.00 49.74 | C |
| ATOM | 5122 | O   | THR | 646 | -24.372 | 36.122 | 49.563 | 1.00 49.74 | O |
| ATOM | 5123 | N   | ARG | 647 | -23.194 | 38.034 | 49.674 | 1.00125.14 | N |
| ATOM | 5124 | CA  | ARG | 647 | -23.442 | 38.164 | 51.082 | 1.00125.14 | C |
| ATOM | 5125 | CB  | ARG | 647 | -22.752 | 39.389 | 51.714 | 1.00125.14 | C |
| ATOM | 5126 | CG  | ARG | 647 | -23.304 | 40.740 | 51.255 | 1.00125.14 | C |
| ATOM | 5127 | CD  | ARG | 647 | -24.561 | 41.149 | 52.029 | 1.00125.14 | C |
| ATOM | 5128 | NE  | ARG | 647 | -25.049 | 42.445 | 51.485 | 1.00125.14 | N |
| ATOM | 5129 | CZ  | ARG | 647 | -26.218 | 42.972 | 51.955 | 1.00125.14 | C |
| ATOM | 5130 | NH1 | ARG | 647 | -26.906 | 42.326 | 52.941 | 1.00125.14 | N |
| ATOM | 5131 | NH2 | ARG | 647 | -26.699 | 44.141 | 51.442 | 1.00125.14 | N |
| ATOM | 5132 | C   | ARG | 647 | -24.917 | 38.313 | 51.291 | 1.00125.14 | C |
| ATOM | 5133 | O   | ARG | 647 | -25.485 | 37.751 | 52.226 | 1.00125.14 | O |
| ATOM | 5134 | N   | TRP | 648 | -25.571 | 39.079 | 50.400 | 1.00 94.79 | N |
| ATOM | 5135 | CA  | TRP | 648 | -26.968 | 39.387 | 50.495 | 1.00 94.79 | C |
| ATOM | 5136 | CB  | TRP | 648 | -27.377 | 40.318 | 49.339 | 1.00 94.79 | C |
| ATOM | 5137 | CG  | TRP | 648 | -28.787 | 40.838 | 49.382 | 1.00 94.79 | C |
| ATOM | 5138 | CD2 | TRP | 648 | -29.908 | 40.197 | 48.757 | 1.00 94.79 | C |
| ATOM | 5139 | CD1 | TRP | 648 | -29.266 | 41.970 | 49.973 | 1.00 94.79 | C |
| ATOM | 5140 | NE1 | TRP | 648 | -30.618 | 42.075 | 49.755 | 1.00 94.79 | N |
| ATOM | 5141 | CE2 | TRP | 648 | -31.027 | 40.989 | 49.009 | 1.00 94.79 | C |
| ATOM | 5142 | CE3 | TRP | 648 | -29.997 | 39.042 | 48.033 | 1.00 94.79 | C |
| ATOM | 5143 | CZ2 | TRP | 648 | -32.261 | 40.637 | 48.543 | 1.00 94.79 | C |
| ATOM | 5144 | CZ3 | TRP | 648 | -31.243 | 38.688 | 47.564 | 1.00 94.79 | C |
| ATOM | 5145 | CH2 | TRP | 648 | -32.352 | 39.471 | 47.815 | 1.00 94.79 | C |
| ATOM | 5146 | C   | TRP | 648 | -27.744 | 38.110 | 50.398 | 1.00 94.79 | C |
| ATOM | 5147 | O   | TRP | 648 | -28.652 | 37.856 | 51.189 | 1.00 94.79 | O |
| ATOM | 5148 | N   | LEU | 649 | -27.398 | 37.257 | 49.420 | 1.00 63.61 | N |
| ATOM | 5149 | CA  | LEU | 649 | -28.111 | 36.024 | 49.238 | 1.00 63.61 | C |
| ATOM | 5150 | CB  | LEU | 649 | -27.632 | 35.254 | 47.994 | 1.00 63.61 | C |
| ATOM | 5151 | CG  | LEU | 649 | -27.978 | 35.957 | 46.667 | 1.00 63.61 | C |
| ATOM | 5152 | CD1 | LEU | 649 | -27.482 | 35.149 | 45.458 | 1.00 63.61 | C |

|      |      |         |     |         |        |        |      |        |   |
|------|------|---------|-----|---------|--------|--------|------|--------|---|
| ATOM | 5153 | CD2 LEU | 649 | -29.485 | 36.258 | 46.581 | 1.00 | 63.61  | C |
| ATOM | 5154 | C LEU   | 649 | -27.903 | 35.141 | 50.428 | 1.00 | 63.61  | C |
| ATOM | 5155 | O LEU   | 649 | -28.844 | 34.525 | 50.923 | 1.00 | 63.61  | O |
| ATOM | 5156 | N GLN   | 650 | -26.655 | 35.065 | 50.926 | 1.00 | 83.64  | N |
| ATOM | 5157 | CA GLN  | 650 | -26.346 | 34.172 | 52.004 | 0.88 | 83.64  | C |
| ATOM | 5158 | CB GLN  | 650 | -24.854 | 34.210 | 52.378 | 0.88 | 83.64  | C |
| ATOM | 5159 | CG GLN  | 650 | -23.930 | 33.685 | 51.280 | 0.83 | 83.64  | C |
| ATOM | 5160 | CD GLN  | 650 | -23.998 | 32.167 | 51.302 | 0.75 | 83.64  | C |
| ATOM | 5161 | OE1 GLN | 650 | -23.844 | 31.543 | 52.350 | 0.75 | 83.64  | O |
| ATOM | 5162 | NE2 GLN | 650 | -24.243 | 31.550 | 50.114 | 1.00 | 83.64  | N |
| ATOM | 5163 | C GLN   | 650 | -27.108 | 34.565 | 53.227 | 1.00 | 83.64  | C |
| ATOM | 5164 | O GLN   | 650 | -27.681 | 33.718 | 53.909 | 1.00 | 83.64  | O |
| ATOM | 5165 | N SER   | 651 | -27.099 | 35.867 | 53.558 | 1.00 | 106.62 | N |
| ATOM | 5166 | CA SER  | 651 | -27.780 | 36.323 | 54.730 | 1.00 | 106.62 | C |
| ATOM | 5167 | CB SER  | 651 | -27.425 | 37.779 | 55.068 | 1.00 | 106.62 | C |
| ATOM | 5168 | OG SER  | 651 | -28.135 | 38.185 | 56.224 | 1.00 | 106.62 | O |
| ATOM | 5169 | C SER   | 651 | -29.271 | 36.258 | 54.577 | 1.00 | 106.62 | C |
| ATOM | 5170 | O SER   | 651 | -29.936 | 35.416 | 55.175 | 1.00 | 106.62 | O |
| ATOM | 5171 | N ASN   | 652 | -29.811 | 37.189 | 53.766 | 1.00 | 167.19 | N |
| ATOM | 5172 | CA ASN  | 652 | -31.216 | 37.451 | 53.590 | 1.00 | 167.19 | C |
| ATOM | 5173 | CB ASN  | 652 | -31.527 | 38.924 | 53.281 | 1.00 | 167.19 | C |
| ATOM | 5174 | CG ASN  | 652 | -30.820 | 39.304 | 52.008 | 1.00 | 167.19 | C |
| ATOM | 5175 | OD1 ASN | 652 | -29.796 | 39.984 | 52.029 | 1.00 | 167.19 | O |
| ATOM | 5176 | ND2 ASN | 652 | -31.366 | 38.826 | 50.860 | 1.00 | 167.19 | N |
| ATOM | 5177 | C ASN   | 652 | -31.995 | 36.568 | 52.646 | 1.00 | 167.19 | C |
| ATOM | 5178 | O ASN   | 652 | -33.222 | 36.549 | 52.726 | 1.00 | 167.19 | O |
| ATOM | 5179 | N GLY   | 653 | -31.351 | 35.819 | 51.732 | 1.00 | 62.13  | N |
| ATOM | 5180 | CA GLY  | 653 | -32.072 | 35.170 | 50.666 | 1.00 | 62.13  | C |
| ATOM | 5181 | C GLY   | 653 | -33.210 | 34.309 | 51.145 | 1.00 | 62.13  | C |
| ATOM | 5182 | O GLY   | 653 | -34.293 | 34.346 | 50.563 | 1.00 | 62.13  | O |
| ATOM | 5183 | N TRP   | 654 | -33.020 | 33.518 | 52.212 | 1.00 | 101.98 | N |
| ATOM | 5184 | CA TRP  | 654 | -34.029 | 32.584 | 52.637 | 1.00 | 101.98 | C |
| ATOM | 5185 | CB TRP  | 654 | -33.532 | 31.757 | 53.838 | 1.00 | 101.98 | C |
| ATOM | 5186 | CG TRP  | 654 | -34.184 | 30.409 | 54.044 | 1.00 | 101.98 | C |
| ATOM | 5187 | CD2 TRP | 654 | -35.559 | 30.161 | 54.379 | 1.00 | 101.98 | C |
| ATOM | 5188 | CD1 TRP | 654 | -33.592 | 29.185 | 53.928 | 1.00 | 101.98 | C |
| ATOM | 5189 | NE1 TRP | 654 | -34.503 | 28.192 | 54.184 | 1.00 | 101.98 | N |
| ATOM | 5190 | CE2 TRP | 654 | -35.720 | 28.776 | 54.460 | 1.00 | 101.98 | C |
| ATOM | 5191 | CE3 TRP | 654 | -36.603 | 31.011 | 54.599 | 1.00 | 101.98 | C |
| ATOM | 5192 | CZ2 TRP | 654 | -36.928 | 28.220 | 54.765 | 1.00 | 101.98 | C |
| ATOM | 5193 | CZ3 TRP | 654 | -37.819 | 30.444 | 54.906 | 1.00 | 101.98 | C |
| ATOM | 5194 | CH2 TRP | 654 | -37.982 | 29.077 | 54.989 | 1.00 | 101.98 | C |
| ATOM | 5195 | C TRP   | 654 | -35.258 | 33.341 | 53.062 | 1.00 | 101.98 | C |
| ATOM | 5196 | O TRP   | 654 | -36.375 | 32.981 | 52.693 | 1.00 | 101.98 | O |
| ATOM | 5197 | N ASP   | 655 | -35.078 | 34.419 | 53.854 | 1.00 | 72.88  | N |
| ATOM | 5198 | CA ASP  | 655 | -36.173 | 35.192 | 54.377 | 1.00 | 72.88  | C |
| ATOM | 5199 | CB ASP  | 655 | -35.711 | 36.304 | 55.336 | 1.00 | 72.88  | C |
| ATOM | 5200 | CG ASP  | 655 | -36.941 | 36.878 | 56.029 | 1.00 | 72.88  | C |
| ATOM | 5201 | OD1 ASP | 655 | -38.061 | 36.365 | 55.766 | 1.00 | 72.88  | O |
| ATOM | 5202 | OD2 ASP | 655 | -36.776 | 37.837 | 56.828 | 1.00 | 72.88  | O |
| ATOM | 5203 | C ASP   | 655 | -36.910 | 35.848 | 53.250 | 1.00 | 72.88  | C |
| ATOM | 5204 | O ASP   | 655 | -38.139 | 35.900 | 53.249 | 1.00 | 72.88  | O |
| ATOM | 5205 | N ARG   | 656 | -36.170 | 36.351 | 52.243 | 1.00 | 141.90 | N |
| ATOM | 5206 | CA ARG  | 656 | -36.764 | 37.045 | 51.135 | 1.00 | 141.90 | C |
| ATOM | 5207 | CB ARG  | 656 | -35.740 | 37.624 | 50.137 | 1.00 | 141.90 | C |
| ATOM | 5208 | CG ARG  | 656 | -35.293 | 39.053 | 50.468 | 1.00 | 141.90 | C |
| ATOM | 5209 | CD ARG  | 656 | -34.584 | 39.220 | 51.812 | 1.00 | 141.90 | C |
| ATOM | 5210 | NE ARG  | 656 | -34.232 | 40.661 | 51.955 | 1.00 | 141.90 | N |
| ATOM | 5211 | CZ ARG  | 656 | -33.900 | 41.160 | 53.182 | 1.00 | 141.90 | C |
| ATOM | 5212 | NH1 ARG | 656 | -33.931 | 40.346 | 54.275 | 1.00 | 141.90 | N |
| ATOM | 5213 | NH2 ARG | 656 | -33.528 | 42.466 | 53.318 | 1.00 | 141.90 | N |
| ATOM | 5214 | C ARG   | 656 | -37.692 | 36.131 | 50.387 | 1.00 | 141.90 | C |
| ATOM | 5215 | O ARG   | 656 | -38.727 | 36.575 | 49.896 | 1.00 | 141.90 | O |
| ATOM | 5216 | N LEU   | 657 | -37.347 | 34.835 | 50.261 | 1.00 | 127.13 | N |
| ATOM | 5217 | CA LEU  | 657 | -38.187 | 33.893 | 49.564 | 1.00 | 127.13 | C |
| ATOM | 5218 | CB LEU  | 657 | -37.562 | 32.497 | 49.381 | 1.00 | 127.13 | C |

|      |      |     |     |     |         |        |        |            |   |
|------|------|-----|-----|-----|---------|--------|--------|------------|---|
| ATOM | 5219 | CG  | LEU | 657 | -36.601 | 32.382 | 48.180 | 1.00127.13 | C |
| ATOM | 5220 | CD1 | LEU | 657 | -35.409 | 33.336 | 48.277 | 1.00127.13 | C |
| ATOM | 5221 | CD2 | LEU | 657 | -36.165 | 30.927 | 47.969 | 1.00127.13 | C |
| ATOM | 5222 | C   | LEU | 657 | -39.512 | 33.711 | 50.261 | 1.00127.13 | C |
| ATOM | 5223 | O   | LEU | 657 | -40.524 | 33.467 | 49.605 | 1.00127.13 | O |
| ATOM | 5224 | N   | LYS | 658 | -39.539 | 33.801 | 51.605 | 1.00103.83 | N |
| ATOM | 5225 | CA  | LYS | 658 | -40.719 | 33.609 | 52.419 | 1.00103.83 | C |
| ATOM | 5226 | CB  | LYS | 658 | -40.477 | 33.831 | 53.926 | 1.00103.83 | C |
| ATOM | 5227 | CG  | LYS | 658 | -39.465 | 32.928 | 54.635 | 1.00103.83 | C |
| ATOM | 5228 | CD  | LYS | 658 | -39.167 | 33.445 | 56.050 | 1.00103.83 | C |
| ATOM | 5229 | CE  | LYS | 658 | -38.204 | 32.592 | 56.880 | 1.00103.83 | C |
| ATOM | 5230 | NZ  | LYS | 658 | -36.811 | 33.044 | 56.670 | 1.00103.83 | N |
| ATOM | 5231 | C   | LYS | 658 | -41.733 | 34.668 | 52.087 | 1.00103.83 | C |
| ATOM | 5232 | O   | LYS | 658 | -42.925 | 34.524 | 52.358 | 1.00103.83 | O |
| ATOM | 5233 | N   | ARG | 659 | -41.244 | 35.813 | 51.598 | 1.00102.85 | N |
| ATOM | 5234 | CA  | ARG | 659 | -41.991 | 36.990 | 51.252 | 1.00102.85 | C |
| ATOM | 5235 | CB  | ARG | 659 | -41.091 | 38.214 | 51.015 | 1.00102.85 | C |
| ATOM | 5236 | CG  | ARG | 659 | -40.396 | 38.704 | 52.283 | 1.00102.85 | C |
| ATOM | 5237 | CD  | ARG | 659 | -39.630 | 40.014 | 52.097 | 1.00102.85 | C |
| ATOM | 5238 | NE  | ARG | 659 | -39.196 | 40.449 | 53.453 | 1.00102.85 | N |
| ATOM | 5239 | CZ  | ARG | 659 | -40.081 | 41.111 | 54.254 | 1.00102.85 | C |
| ATOM | 5240 | NH1 | ARG | 659 | -41.335 | 41.390 | 53.795 | 1.00102.85 | N |
| ATOM | 5241 | NH2 | ARG | 659 | -39.722 | 41.481 | 55.517 | 1.00102.85 | N |
| ATOM | 5242 | C   | ARG | 659 | -42.796 | 36.801 | 50.001 | 1.00102.85 | C |
| ATOM | 5243 | O   | ARG | 659 | -43.593 | 37.672 | 49.660 | 1.00102.85 | O |
| ATOM | 5244 | N   | MET | 660 | -42.536 | 35.732 | 49.221 | 1.00108.33 | N |
| ATOM | 5245 | CA  | MET | 660 | -43.177 | 35.632 | 47.938 | 1.00108.33 | C |
| ATOM | 5246 | CB  | MET | 660 | -42.157 | 35.475 | 46.800 | 1.00108.33 | C |
| ATOM | 5247 | CG  | MET | 660 | -41.154 | 36.622 | 46.712 | 1.00108.33 | C |
| ATOM | 5248 | SD  | MET | 660 | -39.907 | 36.419 | 45.405 | 1.00108.33 | S |
| ATOM | 5249 | CE  | MET | 660 | -38.933 | 35.169 | 46.291 | 1.00108.33 | C |
| ATOM | 5250 | C   | MET | 660 | -44.063 | 34.428 | 47.834 | 1.00108.33 | C |
| ATOM | 5251 | O   | MET | 660 | -43.925 | 33.461 | 48.580 | 1.00108.33 | O |
| ATOM | 5252 | N   | ALA | 661 | -45.050 | 34.513 | 46.911 | 1.00 76.85 | N |
| ATOM | 5253 | CA  | ALA | 661 | -45.869 | 33.401 | 46.517 | 1.00 76.85 | C |
| ATOM | 5254 | CB  | ALA | 661 | -47.361 | 33.569 | 46.854 | 1.00 76.85 | C |
| ATOM | 5255 | C   | ALA | 661 | -45.738 | 33.373 | 45.025 | 1.00 76.85 | C |
| ATOM | 5256 | O   | ALA | 661 | -46.238 | 34.264 | 44.337 | 1.00 76.85 | O |
| ATOM | 5257 | N   | VAL | 662 | -45.067 | 32.336 | 44.478 | 1.00155.91 | N |
| ATOM | 5258 | CA  | VAL | 662 | -44.838 | 32.310 | 43.059 | 1.00155.91 | C |
| ATOM | 5259 | CB  | VAL | 662 | -43.392 | 32.396 | 42.681 | 1.00155.91 | C |
| ATOM | 5260 | CG1 | VAL | 662 | -42.925 | 33.841 | 42.816 | 1.00155.91 | C |
| ATOM | 5261 | CG2 | VAL | 662 | -42.614 | 31.478 | 43.631 | 1.00155.91 | C |
| ATOM | 5262 | C   | VAL | 662 | -45.361 | 31.056 | 42.456 | 1.00155.91 | C |
| ATOM | 5263 | O   | VAL | 662 | -45.031 | 29.949 | 42.880 | 1.00155.91 | O |
| ATOM | 5264 | N   | SER | 663 | -46.196 | 31.232 | 41.417 | 1.00 94.94 | N |
| ATOM | 5265 | CA  | SER | 663 | -46.755 | 30.155 | 40.661 | 1.00 94.94 | C |
| ATOM | 5266 | CB  | SER | 663 | -48.286 | 30.083 | 40.788 | 1.00 94.94 | C |
| ATOM | 5267 | OG  | SER | 663 | -48.820 | 29.190 | 39.823 | 1.00 94.94 | O |
| ATOM | 5268 | C   | SER | 663 | -46.481 | 30.462 | 39.230 | 1.00 94.94 | C |
| ATOM | 5269 | O   | SER | 663 | -47.218 | 31.219 | 38.599 | 1.00 94.94 | O |
| ATOM | 5270 | N   | GLY | 664 | -45.431 | 29.846 | 38.666 | 1.00 60.25 | N |
| ATOM | 5271 | CA  | GLY | 664 | -45.125 | 30.090 | 37.289 | 1.00 60.25 | C |
| ATOM | 5272 | C   | GLY | 664 | -44.829 | 31.545 | 37.137 | 1.00 60.25 | C |
| ATOM | 5273 | O   | GLY | 664 | -43.954 | 32.095 | 37.803 | 1.00 60.25 | O |
| ATOM | 5274 | N   | ASP | 665 | -45.538 | 32.173 | 36.183 | 1.00153.14 | N |
| ATOM | 5275 | CA  | ASP | 665 | -45.447 | 33.559 | 35.836 | 1.00153.14 | C |
| ATOM | 5276 | CB  | ASP | 665 | -46.162 | 33.869 | 34.515 | 1.00153.14 | C |
| ATOM | 5277 | CG  | ASP | 665 | -45.754 | 35.272 | 34.130 | 1.00153.14 | C |
| ATOM | 5278 | OD1 | ASP | 665 | -44.740 | 35.748 | 34.705 | 1.00153.14 | O |
| ATOM | 5279 | OD2 | ASP | 665 | -46.434 | 35.885 | 33.265 | 1.00153.14 | O |
| ATOM | 5280 | C   | ASP | 665 | -46.073 | 34.427 | 36.898 | 1.00153.14 | C |
| ATOM | 5281 | O   | ASP | 665 | -45.721 | 35.599 | 37.033 | 1.00153.14 | O |
| ATOM | 5282 | N   | ASP | 666 | -47.076 | 33.904 | 37.633 | 1.00 85.88 | N |
| ATOM | 5283 | CA  | ASP | 666 | -47.768 | 34.696 | 38.622 | 1.00 85.88 | C |
| ATOM | 5284 | CB  | ASP | 666 | -49.094 | 34.079 | 39.100 | 1.00 85.88 | C |



|      |      |     |     |     |         |        |        |            |       |   |
|------|------|-----|-----|-----|---------|--------|--------|------------|-------|---|
| ATOM | 5285 | CG  | ASP | 666 | -50.151 | 34.250 | 38.021 | 1.00       | 85.88 | C |
| ATOM | 5286 | OD1 | ASP | 666 | -49.953 | 35.111 | 37.122 | 1.00       | 85.88 | O |
| ATOM | 5287 | OD2 | ASP | 666 | -51.178 | 33.526 | 38.087 | 1.00       | 85.88 | O |
| ATOM | 5288 | C   | ASP | 666 | -46.922 | 34.861 | 39.849 | 1.00       | 85.88 | C |
| ATOM | 5289 | O   | ASP | 666 | -46.302 | 33.906 | 40.310 | 1.00       | 85.88 | O |
| ATOM | 5290 | N   | CYS | 667 | -46.905 | 36.084 | 40.432 | 1.00126.23 |       | N |
| ATOM | 5291 | CA  | CYS | 667 | -46.110 | 36.333 | 41.607 | 1.00126.23 |       | C |
| ATOM | 5292 | CB  | CYS | 667 | -44.778 | 37.047 | 41.353 | 1.00126.23 |       | C |
| ATOM | 5293 | SG  | CYS | 667 | -43.470 | 35.993 | 40.712 | 1.00126.23 |       | S |
| ATOM | 5294 | C   | CYS | 667 | -46.772 | 37.321 | 42.512 | 1.00126.23 |       | C |
| ATOM | 5295 | O   | CYS | 667 | -47.483 | 38.221 | 42.069 | 1.00126.23 |       | O |
| ATOM | 5296 | N   | VAL | 668 | -46.514 | 37.164 | 43.827 | 1.00       | 67.18 | N |
| ATOM | 5297 | CA  | VAL | 668 | -46.898 | 38.123 | 44.824 | 1.00       | 67.18 | C |
| ATOM | 5298 | CB  | VAL | 668 | -48.006 | 37.658 | 45.729 | 1.00       | 67.18 | C |
| ATOM | 5299 | CG1 | VAL | 668 | -48.223 | 38.711 | 46.830 | 1.00       | 67.18 | C |
| ATOM | 5300 | CG2 | VAL | 668 | -49.261 | 37.398 | 44.877 | 1.00       | 67.18 | C |
| ATOM | 5301 | C   | VAL | 668 | -45.669 | 38.320 | 45.667 | 1.00       | 67.18 | C |
| ATOM | 5302 | O   | VAL | 668 | -45.063 | 37.347 | 46.116 | 1.00       | 67.18 | O |
| ATOM | 5303 | N   | VAL | 669 | -45.251 | 39.584 | 45.897 | 1.00       | 62.85 | N |
| ATOM | 5304 | CA  | VAL | 669 | -44.054 | 39.816 | 46.663 | 1.00       | 62.85 | C |
| ATOM | 5305 | CB  | VAL | 669 | -42.914 | 40.301 | 45.811 | 1.00       | 62.85 | C |
| ATOM | 5306 | CG1 | VAL | 669 | -41.698 | 40.584 | 46.707 | 1.00       | 62.85 | C |
| ATOM | 5307 | CG2 | VAL | 669 | -42.654 | 39.267 | 44.704 | 1.00       | 62.85 | C |
| ATOM | 5308 | C   | VAL | 669 | -44.311 | 40.898 | 47.671 | 1.00       | 62.85 | C |
| ATOM | 5309 | O   | VAL | 669 | -44.917 | 41.918 | 47.351 | 1.00       | 62.85 | O |
| ATOM | 5310 | N   | LYS | 670 | -43.852 | 40.693 | 48.929 | 1.00167.93 |       | N |
| ATOM | 5311 | CA  | LYS | 670 | -43.961 | 41.717 | 49.936 | 1.00167.93 |       | C |
| ATOM | 5312 | CB  | LYS | 670 | -44.622 | 41.265 | 51.243 | 1.00167.93 |       | C |
| ATOM | 5313 | CG  | LYS | 670 | -46.125 | 41.047 | 51.162 | 1.00167.93 |       | C |
| ATOM | 5314 | CD  | LYS | 670 | -46.692 | 40.387 | 52.418 | 1.00167.93 |       | C |
| ATOM | 5315 | CE  | LYS | 670 | -46.807 | 41.345 | 53.606 | 1.00167.93 |       | C |
| ATOM | 5316 | NZ  | LYS | 670 | -45.476 | 41.889 | 53.949 | 1.00167.93 |       | N |
| ATOM | 5317 | C   | LYS | 670 | -42.563 | 42.080 | 50.332 | 1.00167.93 |       | C |
| ATOM | 5318 | O   | LYS | 670 | -41.955 | 41.413 | 51.166 | 1.00167.93 |       | O |
| ATOM | 5319 | N   | PRO | 671 | -42.060 | 43.151 | 49.789 | 1.00       | 93.93 | N |
| ATOM | 5320 | CA  | PRO | 671 | -40.714 | 43.600 | 50.042 | 1.00       | 93.93 | C |
| ATOM | 5321 | CB  | PRO | 671 | -42.603 | 43.711 | 48.564 | 1.00       | 93.93 | C |
| ATOM | 5322 | CD  | PRO | 671 | -40.365 | 44.554 | 48.898 | 1.00       | 93.93 | C |
| ATOM | 5323 | CG  | PRO | 671 | -41.722 | 44.939 | 48.287 | 1.00       | 93.93 | C |
| ATOM | 5324 | C   | PRO | 671 | -40.582 | 44.233 | 51.389 | 1.00       | 93.93 | C |
| ATOM | 5325 | O   | PRO | 671 | -41.590 | 44.438 | 52.064 | 1.00       | 93.93 | O |
| ATOM | 5326 | N   | ILE | 672 | -39.330 | 44.519 | 51.804 | 1.00120.39 |       | N |
| ATOM | 5327 | CA  | ILE | 672 | -39.058 | 45.150 | 53.061 | 1.00120.39 |       | C |
| ATOM | 5328 | CB  | ILE | 672 | -37.587 | 45.207 | 53.395 | 1.00120.39 |       | C |
| ATOM | 5329 | CG1 | ILE | 672 | -36.780 | 45.983 | 52.340 | 1.00120.39 |       | C |
| ATOM | 5330 | CG2 | ILE | 672 | -37.102 | 43.757 | 53.583 | 1.00120.39 |       | C |
| ATOM | 5331 | CD1 | ILE | 672 | -36.727 | 45.287 | 50.981 | 1.00120.39 |       | C |
| ATOM | 5332 | C   | ILE | 672 | -39.654 | 46.528 | 53.065 | 1.00120.39 |       | C |
| ATOM | 5333 | O   | ILE | 672 | -40.170 | 46.973 | 54.088 | 1.00120.39 |       | O |
| ATOM | 5334 | N   | ASP | 673 | -39.564 | 47.260 | 51.935 | 1.00       | 97.31 | N |
| ATOM | 5335 | CA  | ASP | 673 | -40.158 | 48.567 | 51.863 | 1.00       | 97.31 | C |
| ATOM | 5336 | CB  | ASP | 673 | -39.213 | 49.711 | 52.272 | 1.00       | 97.31 | C |
| ATOM | 5337 | CG  | ASP | 673 | -37.995 | 49.736 | 51.369 | 1.00       | 97.31 | C |
| ATOM | 5338 | OD1 | ASP | 673 | -37.952 | 48.972 | 50.367 | 1.00       | 97.31 | O |
| ATOM | 5339 | OD2 | ASP | 673 | -37.073 | 50.531 | 51.689 | 1.00       | 97.31 | O |
| ATOM | 5340 | C   | ASP | 673 | -40.686 | 48.800 | 50.471 | 1.00       | 97.31 | C |
| ATOM | 5341 | O   | ASP | 673 | -40.715 | 47.892 | 49.643 | 1.00       | 97.31 | O |
| ATOM | 5342 | N   | ASP | 674 | -41.181 | 50.030 | 50.218 | 1.00105.66 |       | N |
| ATOM | 5343 | CA  | ASP | 674 | -41.799 | 50.491 | 48.998 | 1.00105.66 |       | C |
| ATOM | 5344 | CB  | ASP | 674 | -42.811 | 51.621 | 49.225 | 1.00105.66 |       | C |
| ATOM | 5345 | CG  | ASP | 674 | -44.037 | 50.927 | 49.808 | 1.00105.66 |       | C |
| ATOM | 5346 | OD1 | ASP | 674 | -44.415 | 49.855 | 49.263 | 1.00105.66 |       | O |
| ATOM | 5347 | OD2 | ASP | 674 | -44.599 | 51.442 | 50.812 | 1.00105.66 |       | O |
| ATOM | 5348 | C   | ASP | 674 | -40.860 | 50.841 | 47.871 | 1.00105.66 |       | C |
| ATOM | 5349 | O   | ASP | 674 | -41.315 | 51.129 | 46.766 | 1.00105.66 |       | O |
| ATOM | 5350 | N   | ARG | 675 | -39.542 | 50.899 | 48.108 | 1.00176.93 |       | N |

|      |      |     |     |     |         |        |        |            |   |
|------|------|-----|-----|-----|---------|--------|--------|------------|---|
| ATOM | 5351 | CA  | ARG | 675 | -38.611 | 51.269 | 47.073 | 1.00176.93 | C |
| ATOM | 5352 | CB  | ARG | 675 | -37.193 | 51.536 | 47.613 | 1.00176.93 | C |
| ATOM | 5353 | CG  | ARG | 675 | -36.603 | 50.432 | 48.478 | 1.00176.93 | C |
| ATOM | 5354 | CD  | ARG | 675 | -35.481 | 50.944 | 49.387 | 1.00176.93 | C |
| ATOM | 5355 | NE  | ARG | 675 | -34.999 | 49.791 | 50.195 | 1.00176.93 | N |
| ATOM | 5356 | CZ  | ARG | 675 | -34.147 | 50.000 | 51.242 | 1.00176.93 | C |
| ATOM | 5357 | NH1 | ARG | 675 | -33.672 | 51.254 | 51.498 | 1.00176.93 | N |
| ATOM | 5358 | NH2 | ARG | 675 | -33.782 | 48.953 | 52.037 | 1.00176.93 | N |
| ATOM | 5359 | C   | ARG | 675 | -38.660 | 50.269 | 45.950 | 1.00176.93 | C |
| ATOM | 5360 | O   | ARG | 675 | -38.212 | 50.534 | 44.836 | 1.00176.93 | O |
| ATOM | 5361 | N   | PHE | 676 | -39.223 | 49.084 | 46.231 | 1.00 85.24 | N |
| ATOM | 5362 | CA  | PHE | 676 | -39.400 | 47.991 | 45.314 | 1.00 85.24 | C |
| ATOM | 5363 | CB  | PHE | 676 | -40.155 | 46.842 | 46.011 | 1.00 85.24 | C |
| ATOM | 5364 | CG  | PHE | 676 | -40.234 | 45.633 | 45.146 | 1.00 85.24 | C |
| ATOM | 5365 | CD1 | PHE | 676 | -39.170 | 44.762 | 45.072 | 1.00 85.24 | C |
| ATOM | 5366 | CD2 | PHE | 676 | -41.377 | 45.354 | 44.435 | 1.00 85.24 | C |
| ATOM | 5367 | CE1 | PHE | 676 | -39.239 | 43.636 | 44.287 | 1.00 85.24 | C |
| ATOM | 5368 | CE2 | PHE | 676 | -41.451 | 44.229 | 43.648 | 1.00 85.24 | C |
| ATOM | 5369 | CZ  | PHE | 676 | -40.381 | 43.370 | 43.572 | 1.00 85.24 | C |
| ATOM | 5370 | C   | PHE | 676 | -40.224 | 48.459 | 44.139 | 1.00 85.24 | C |
| ATOM | 5371 | O   | PHE | 676 | -40.025 | 48.011 | 43.010 | 1.00 85.24 | O |
| ATOM | 5372 | N   | ALA | 677 | -41.188 | 49.367 | 44.368 | 1.00 50.82 | N |
| ATOM | 5373 | CA  | ALA | 677 | -42.068 | 49.813 | 43.320 | 1.00 50.82 | C |
| ATOM | 5374 | CB  | ALA | 677 | -43.098 | 50.845 | 43.813 | 1.00 50.82 | C |
| ATOM | 5375 | C   | ALA | 677 | -41.289 | 50.449 | 42.205 | 1.00 50.82 | C |
| ATOM | 5376 | O   | ALA | 677 | -41.660 | 50.314 | 41.037 | 1.00 50.82 | O |
| ATOM | 5377 | N   | HIS | 678 | -40.250 | 51.237 | 42.544 | 1.00136.73 | N |
| ATOM | 5378 | CA  | HIS | 678 | -39.407 | 51.899 | 41.585 | 1.00136.73 | C |
| ATOM | 5379 | ND1 | HIS | 678 | -37.772 | 53.127 | 44.439 | 1.00136.73 | N |
| ATOM | 5380 | CG  | HIS | 678 | -37.635 | 52.995 | 43.076 | 1.00136.73 | C |
| ATOM | 5381 | CB  | HIS | 678 | -38.746 | 53.195 | 42.093 | 1.00136.73 | C |
| ATOM | 5382 | NE2 | HIS | 678 | -35.643 | 52.608 | 44.059 | 1.00136.73 | N |
| ATOM | 5383 | CD2 | HIS | 678 | -36.330 | 52.678 | 42.861 | 1.00136.73 | C |
| ATOM | 5384 | CE1 | HIS | 678 | -36.550 | 52.885 | 44.977 | 1.00136.73 | C |
| ATOM | 5385 | C   | HIS | 678 | -38.331 | 51.013 | 41.012 | 1.00136.73 | C |
| ATOM | 5386 | O   | HIS | 678 | -37.741 | 51.370 | 39.997 | 1.00136.73 | O |
| ATOM | 5387 | N   | ALA | 679 | -37.973 | 49.880 | 41.660 | 1.00 85.49 | N |
| ATOM | 5388 | CA  | ALA | 679 | -36.842 | 49.119 | 41.174 | 1.00 85.49 | C |
| ATOM | 5389 | CB  | ALA | 679 | -36.346 | 48.077 | 42.192 | 1.00 85.49 | C |
| ATOM | 5390 | C   | ALA | 679 | -37.205 | 48.380 | 39.916 | 1.00 85.49 | C |
| ATOM | 5391 | O   | ALA | 679 | -37.576 | 47.210 | 39.935 | 1.00 85.49 | O |
| ATOM | 5392 | N   | LEU | 680 | -37.193 | 49.115 | 38.793 | 1.00151.84 | N |
| ATOM | 5393 | CA  | LEU | 680 | -37.486 | 48.685 | 37.455 | 1.00151.84 | C |
| ATOM | 5394 | CB  | LEU | 680 | -38.400 | 49.696 | 36.747 | 1.00151.84 | C |
| ATOM | 5395 | CG  | LEU | 680 | -39.721 | 49.866 | 37.534 | 1.00151.84 | C |
| ATOM | 5396 | CD1 | LEU | 680 | -40.708 | 50.792 | 36.810 | 1.00151.84 | C |
| ATOM | 5397 | CD2 | LEU | 680 | -40.334 | 48.504 | 37.909 | 1.00151.84 | C |
| ATOM | 5398 | C   | LEU | 680 | -36.323 | 48.308 | 36.576 | 1.00151.84 | C |
| ATOM | 5399 | O   | LEU | 680 | -36.518 | 47.626 | 35.573 | 1.00151.84 | O |
| ATOM | 5400 | N   | ARG | 681 | -35.104 | 48.809 | 36.867 | 1.00111.43 | N |
| ATOM | 5401 | CA  | ARG | 681 | -34.005 | 48.705 | 35.939 | 1.00111.43 | C |
| ATOM | 5402 | CB  | ARG | 681 | -32.736 | 49.405 | 36.456 | 1.00111.43 | C |
| ATOM | 5403 | CG  | ARG | 681 | -32.860 | 50.931 | 36.460 | 1.00111.43 | C |
| ATOM | 5404 | CD  | ARG | 681 | -32.576 | 51.551 | 35.091 | 1.00111.43 | C |
| ATOM | 5405 | NE  | ARG | 681 | -32.922 | 52.999 | 35.155 | 1.00111.43 | N |
| ATOM | 5406 | CZ  | ARG | 681 | -33.176 | 53.674 | 33.996 | 1.00111.43 | C |
| ATOM | 5407 | NH1 | ARG | 681 | -33.109 | 53.016 | 32.801 | 1.00111.43 | N |
| ATOM | 5408 | NH2 | ARG | 681 | -33.501 | 54.999 | 34.028 | 1.00111.43 | N |
| ATOM | 5409 | C   | ARG | 681 | -33.646 | 47.289 | 35.590 | 1.00111.43 | C |
| ATOM | 5410 | O   | ARG | 681 | -33.513 | 46.962 | 34.412 | 1.00111.43 | O |
| ATOM | 5411 | N   | PHE | 682 | -33.460 | 46.412 | 36.591 | 1.00 88.85 | N |
| ATOM | 5412 | CA  | PHE | 682 | -33.102 | 45.041 | 36.339 | 1.00 88.85 | C |
| ATOM | 5413 | CB  | PHE | 682 | -32.784 | 44.256 | 37.625 | 1.00 88.85 | C |
| ATOM | 5414 | CG  | PHE | 682 | -31.400 | 44.547 | 38.096 | 1.00 88.85 | C |
| ATOM | 5415 | CD1 | PHE | 682 | -31.053 | 45.770 | 38.619 | 1.00 88.85 | C |
| ATOM | 5416 | CD2 | PHE | 682 | -30.452 | 43.551 | 38.044 | 1.00 88.85 | C |

|      |      |     |     |     |         |        |        |            |       |   |
|------|------|-----|-----|-----|---------|--------|--------|------------|-------|---|
| ATOM | 5417 | CE1 | PHE | 682 | -29.768 | 46.001 | 39.055 | 1.00       | 88.85 | C |
| ATOM | 5418 | CE2 | PHE | 682 | -29.169 | 43.773 | 38.479 | 1.00       | 88.85 | C |
| ATOM | 5419 | CZ  | PHE | 682 | -28.824 | 45.003 | 38.987 | 1.00       | 88.85 | C |
| ATOM | 5420 | C   | PHE | 682 | -34.236 | 44.316 | 35.690 | 1.00       | 88.85 | C |
| ATOM | 5421 | O   | PHE | 682 | -34.046 | 43.535 | 34.762 | 1.00       | 88.85 | O |
| ATOM | 5422 | N   | LEU | 683 | -35.464 | 44.566 | 36.168 | 1.00       | 64.54 | N |
| ATOM | 5423 | CA  | LEU | 683 | -36.607 | 43.838 | 35.706 | 1.00       | 64.54 | C |
| ATOM | 5424 | CB  | LEU | 683 | -37.904 | 44.320 | 36.381 | 1.00       | 64.54 | C |
| ATOM | 5425 | CG  | LEU | 683 | -39.164 | 43.527 | 35.984 | 1.00       | 64.54 | C |
| ATOM | 5426 | CD1 | LEU | 683 | -39.094 | 42.078 | 36.494 | 1.00       | 64.54 | C |
| ATOM | 5427 | CD2 | LEU | 683 | -40.443 | 44.250 | 36.436 | 1.00       | 64.54 | C |
| ATOM | 5428 | C   | LEU | 683 | -36.760 | 44.032 | 34.225 | 1.00       | 64.54 | C |
| ATOM | 5429 | O   | LEU | 683 | -37.002 | 43.073 | 33.495 | 1.00       | 64.54 | O |
| ATOM | 5430 | N   | ASN | 684 | -36.628 | 45.283 | 33.744 | 1.00168.27 |       | N |
| ATOM | 5431 | CA  | ASN | 684 | -36.783 | 45.594 | 32.348 | 1.00168.27 |       | C |
| ATOM | 5432 | CB  | ASN | 684 | -36.784 | 47.109 | 32.059 | 1.00168.27 |       | C |
| ATOM | 5433 | CG  | ASN | 684 | -38.038 | 47.735 | 32.656 | 1.00168.27 |       | C |
| ATOM | 5434 | OD1 | ASN | 684 | -37.962 | 48.720 | 33.386 | 1.00168.27 |       | O |
| ATOM | 5435 | ND2 | ASN | 684 | -39.227 | 47.162 | 32.336 | 1.00168.27 |       | N |
| ATOM | 5436 | C   | ASN | 684 | -35.649 | 45.010 | 31.555 | 1.00168.27 |       | C |
| ATOM | 5437 | O   | ASN | 684 | -35.850 | 44.499 | 30.455 | 1.00168.27 |       | O |
| ATOM | 5438 | N   | ASP | 685 | -34.423 | 45.078 | 32.105 | 1.00       | 58.45 | N |
| ATOM | 5439 | CA  | ASP | 685 | -33.219 | 44.655 | 31.439 | 1.00       | 58.45 | C |
| ATOM | 5440 | CB  | ASP | 685 | -31.964 | 44.935 | 32.285 | 1.00       | 58.45 | C |
| ATOM | 5441 | CG  | ASP | 685 | -30.723 | 44.722 | 31.432 | 1.00       | 58.45 | C |
| ATOM | 5442 | OD1 | ASP | 685 | -30.871 | 44.416 | 30.219 | 1.00       | 58.45 | O |
| ATOM | 5443 | OD2 | ASP | 685 | -29.601 | 44.861 | 31.989 | 1.00       | 58.45 | O |
| ATOM | 5444 | C   | ASP | 685 | -33.268 | 43.179 | 31.175 | 1.00       | 58.45 | C |
| ATOM | 5445 | O   | ASP | 685 | -32.743 | 42.696 | 30.173 | 1.00       | 58.45 | O |
| ATOM | 5446 | N   | MET | 686 | -33.878 | 42.426 | 32.106 | 1.00       | 84.18 | N |
| ATOM | 5447 | CA  | MET | 686 | -34.027 | 41.001 | 32.049 | 1.00       | 84.18 | C |
| ATOM | 5448 | CB  | MET | 686 | -34.419 | 40.381 | 33.400 | 1.00       | 84.18 | C |
| ATOM | 5449 | CG  | MET | 686 | -33.279 | 40.515 | 34.417 | 1.00       | 84.18 | C |
| ATOM | 5450 | SD  | MET | 686 | -33.559 | 39.719 | 36.026 | 1.00       | 84.18 | S |
| ATOM | 5451 | CE  | MET | 686 | -34.785 | 40.924 | 36.611 | 1.00       | 84.18 | C |
| ATOM | 5452 | C   | MET | 686 | -35.012 | 40.640 | 30.975 | 1.00       | 84.18 | C |
| ATOM | 5453 | O   | MET | 686 | -35.089 | 39.486 | 30.556 | 1.00       | 84.18 | O |
| ATOM | 5454 | N   | GLY | 687 | -35.857 | 41.606 | 30.565 | 1.00129.32 |       | N |
| ATOM | 5455 | CA  | GLY | 687 | -36.792 | 41.371 | 29.502 | 1.00129.32 |       | C |
| ATOM | 5456 | C   | GLY | 687 | -38.120 | 41.019 | 30.083 | 1.00129.32 |       | C |
| ATOM | 5457 | O   | GLY | 687 | -39.060 | 40.707 | 29.352 | 1.00129.32 |       | O |
| ATOM | 5458 | N   | LYS | 688 | -38.237 | 41.062 | 31.421 | 1.00292.39 |       | N |
| ATOM | 5459 | CA  | LYS | 688 | -39.486 | 40.710 | 32.026 | 1.00292.39 |       | C |
| ATOM | 5460 | CB  | LYS | 688 | -39.292 | 40.122 | 33.433 | 1.00292.39 |       | C |
| ATOM | 5461 | CG  | LYS | 688 | -38.331 | 38.931 | 33.451 | 1.00292.39 |       | C |
| ATOM | 5462 | CD  | LYS | 688 | -38.777 | 37.767 | 32.565 | 1.00292.39 |       | C |
| ATOM | 5463 | CE  | LYS | 688 | -37.754 | 36.631 | 32.486 | 1.00292.39 |       | C |
| ATOM | 5464 | NZ  | LYS | 688 | -36.626 | 37.021 | 31.611 | 1.00292.39 |       | N |
| ATOM | 5465 | C   | LYS | 688 | -40.303 | 41.959 | 32.172 | 1.00292.39 |       | C |
| ATOM | 5466 | O   | LYS | 688 | -40.572 | 42.406 | 33.286 | 1.00292.39 |       | O |
| ATOM | 5467 | N   | VAL | 689 | -40.774 | 42.521 | 31.040 | 1.00232.49 |       | N |
| ATOM | 5468 | CA  | VAL | 689 | -41.520 | 43.749 | 31.086 | 1.00232.49 |       | C |
| ATOM | 5469 | CB  | VAL | 689 | -41.631 | 44.429 | 29.748 | 1.00232.49 |       | C |
| ATOM | 5470 | CG1 | VAL | 689 | -42.467 | 45.709 | 29.903 | 1.00232.49 |       | C |
| ATOM | 5471 | CG2 | VAL | 689 | -40.211 | 44.694 | 29.217 | 1.00232.49 |       | C |
| ATOM | 5472 | C   | VAL | 689 | -42.900 | 43.463 | 31.604 | 1.00232.49 |       | C |
| ATOM | 5473 | O   | VAL | 689 | -43.522 | 42.458 | 31.261 | 1.00232.49 |       | O |
| ATOM | 5474 | N   | ARG | 690 | -43.407 | 44.373 | 32.459 | 1.00370.62 |       | N |
| ATOM | 5475 | CA  | ARG | 690 | -44.680 | 44.247 | 33.109 | 1.00370.62 |       | C |
| ATOM | 5476 | CB  | ARG | 690 | -44.792 | 45.199 | 34.311 | 1.00370.62 |       | C |
| ATOM | 5477 | CG  | ARG | 690 | -43.875 | 44.764 | 35.458 | 1.00370.62 |       | C |
| ATOM | 5478 | CD  | ARG | 690 | -43.224 | 45.916 | 36.224 | 1.00370.62 |       | C |
| ATOM | 5479 | NE  | ARG | 690 | -44.288 | 46.839 | 36.697 | 1.00370.62 |       | N |
| ATOM | 5480 | CZ  | ARG | 690 | -44.002 | 48.166 | 36.826 | 1.00370.62 |       | C |
| ATOM | 5481 | NH1 | ARG | 690 | -42.789 | 48.641 | 36.420 | 1.00370.62 |       | N |
| ATOM | 5482 | NH2 | ARG | 690 | -44.920 | 49.018 | 37.365 | 1.00370.62 |       | N |

|      |      |     |     |     |         |        |        |            |   |
|------|------|-----|-----|-----|---------|--------|--------|------------|---|
| ATOM | 5483 | C   | ARG | 690 | -45.776 | 44.524 | 32.130 | 1.00370.62 | C |
| ATOM | 5484 | O   | ARG | 690 | -45.606 | 45.278 | 31.174 | 1.00370.62 | O |
| ATOM | 5485 | N   | LYS | 691 | -46.937 | 43.878 | 32.344 | 1.00181.83 | N |
| ATOM | 5486 | CA  | LYS | 691 | -48.044 | 44.017 | 31.444 | 1.00181.83 | C |
| ATOM | 5487 | CB  | LYS | 691 | -48.978 | 42.794 | 31.447 | 1.00181.83 | C |
| ATOM | 5488 | CG  | LYS | 691 | -50.114 | 42.882 | 30.426 | 1.00181.83 | C |
| ATOM | 5489 | CD  | LYS | 691 | -50.888 | 41.575 | 30.260 | 1.00181.83 | C |
| ATOM | 5490 | CE  | LYS | 691 | -52.024 | 41.668 | 29.239 | 1.00181.83 | C |
| ATOM | 5491 | NZ  | LYS | 691 | -52.813 | 40.418 | 29.242 | 1.00181.83 | N |
| ATOM | 5492 | C   | LYS | 691 | -48.879 | 45.204 | 31.815 | 1.00181.83 | C |
| ATOM | 5493 | O   | LYS | 691 | -49.038 | 45.542 | 32.986 | 1.00181.83 | O |
| ATOM | 5494 | N   | ASP | 692 | -49.440 | 45.855 | 30.778 | 1.00107.37 | N |
| ATOM | 5495 | CA  | ASP | 692 | -50.368 | 46.944 | 30.887 | 1.00107.37 | C |
| ATOM | 5496 | CB  | ASP | 692 | -51.722 | 46.497 | 31.459 | 1.00107.37 | C |
| ATOM | 5497 | CG  | ASP | 692 | -52.726 | 47.599 | 31.181 | 1.00107.37 | C |
| ATOM | 5498 | OD1 | ASP | 692 | -52.310 | 48.652 | 30.629 | 1.00107.37 | O |
| ATOM | 5499 | OD2 | ASP | 692 | -53.925 | 47.399 | 31.511 | 1.00107.37 | O |
| ATOM | 5500 | C   | ASP | 692 | -49.851 | 48.075 | 31.723 | 1.00107.37 | C |
| ATOM | 5501 | O   | ASP | 692 | -50.579 | 48.615 | 32.555 | 1.00107.37 | O |
| ATOM | 5502 | N   | THR | 693 | -48.579 | 48.468 | 31.533 | 1.00491.96 | N |
| ATOM | 5503 | CA  | THR | 693 | -48.083 | 49.602 | 32.258 | 1.00491.96 | C |
| ATOM | 5504 | CB  | THR | 693 | -47.555 | 49.253 | 33.620 | 1.00491.96 | C |
| ATOM | 5505 | OG1 | THR | 693 | -48.571 | 48.642 | 34.401 | 1.00491.96 | O |
| ATOM | 5506 | CG2 | THR | 693 | -47.062 | 50.541 | 34.303 | 1.00491.96 | C |
| ATOM | 5507 | C   | THR | 693 | -46.928 | 50.147 | 31.484 | 1.00491.96 | C |
| ATOM | 5508 | O   | THR | 693 | -46.220 | 49.401 | 30.809 | 1.00491.96 | O |
| ATOM | 5509 | N   | GLN | 694 | -46.691 | 51.470 | 31.581 | 1.00451.85 | N |
| ATOM | 5510 | CA  | GLN | 694 | -45.567 | 52.040 | 30.901 | 1.00451.85 | C |
| ATOM | 5511 | CB  | GLN | 694 | -45.486 | 53.569 | 31.062 | 1.00451.85 | C |
| ATOM | 5512 | CG  | GLN | 694 | -44.296 | 54.213 | 30.350 | 1.00451.85 | C |
| ATOM | 5513 | CD  | GLN | 694 | -44.423 | 53.895 | 28.869 | 1.00451.85 | C |
| ATOM | 5514 | OE1 | GLN | 694 | -44.316 | 52.739 | 28.462 | 1.00451.85 | O |
| ATOM | 5515 | NE2 | GLN | 694 | -44.658 | 54.945 | 28.038 | 1.00451.85 | N |
| ATOM | 5516 | C   | GLN | 694 | -44.378 | 51.412 | 31.556 | 1.00451.85 | C |
| ATOM | 5517 | O   | GLN | 694 | -44.408 | 51.113 | 32.748 | 1.00451.85 | O |
| ATOM | 5518 | N   | GLU | 695 | -43.288 | 51.193 | 30.797 | 1.00219.00 | N |
| ATOM | 5519 | CA  | GLU | 695 | -42.213 | 50.425 | 31.352 | 1.00219.00 | C |
| ATOM | 5520 | CB  | GLU | 695 | -41.092 | 50.079 | 30.356 | 1.00219.00 | C |
| ATOM | 5521 | CG  | GLU | 695 | -40.323 | 51.266 | 29.786 | 1.00219.00 | C |
| ATOM | 5522 | CD  | GLU | 695 | -39.280 | 50.693 | 28.839 | 1.00219.00 | C |
| ATOM | 5523 | OE1 | GLU | 695 | -38.585 | 49.723 | 29.244 | 1.00219.00 | O |
| ATOM | 5524 | OE2 | GLU | 695 | -39.169 | 51.208 | 27.695 | 1.00219.00 | O |
| ATOM | 5525 | C   | GLU | 695 | -41.610 | 51.087 | 32.561 | 1.00219.00 | C |
| ATOM | 5526 | O   | GLU | 695 | -41.199 | 50.407 | 33.499 | 1.00219.00 | O |
| ATOM | 5527 | N   | TRP | 696 | -41.472 | 52.423 | 32.541 | 1.00133.44 | N |
| ATOM | 5528 | CA  | TRP | 696 | -40.865 | 53.175 | 33.607 | 1.00133.44 | C |
| ATOM | 5529 | CB  | TRP | 696 | -40.159 | 54.426 | 33.083 | 1.00133.44 | C |
| ATOM | 5530 | CG  | TRP | 696 | -39.083 | 53.976 | 32.122 | 1.00133.44 | C |
| ATOM | 5531 | CD2 | TRP | 696 | -37.999 | 53.103 | 32.484 | 1.00133.44 | C |
| ATOM | 5532 | CD1 | TRP | 696 | -38.975 | 54.190 | 30.780 | 1.00133.44 | C |
| ATOM | 5533 | NE1 | TRP | 696 | -37.890 | 53.508 | 30.282 | 1.00133.44 | N |
| ATOM | 5534 | CE2 | TRP | 696 | -37.281 | 52.833 | 31.319 | 1.00133.44 | C |
| ATOM | 5535 | CE3 | TRP | 696 | -37.639 | 52.558 | 33.683 | 1.00133.44 | C |
| ATOM | 5536 | CZ2 | TRP | 696 | -36.189 | 52.012 | 31.337 | 1.00133.44 | C |
| ATOM | 5537 | CZ3 | TRP | 696 | -36.529 | 51.742 | 33.701 | 1.00133.44 | C |
| ATOM | 5538 | CH2 | TRP | 696 | -35.817 | 51.474 | 32.549 | 1.00133.44 | C |
| ATOM | 5539 | C   | TRP | 696 | -41.750 | 53.473 | 34.791 | 1.00133.44 | C |
| ATOM | 5540 | O   | TRP | 696 | -41.241 | 53.796 | 35.862 | 1.00133.44 | O |
| ATOM | 5541 | N   | LYS | 697 | -43.092 | 53.454 | 34.648 | 1.00145.68 | N |
| ATOM | 5542 | CA  | LYS | 697 | -43.930 | 53.831 | 35.762 | 1.00145.68 | C |
| ATOM | 5543 | CB  | LYS | 697 | -45.420 | 53.968 | 35.417 | 1.00145.68 | C |
| ATOM | 5544 | CG  | LYS | 697 | -45.725 | 55.267 | 34.679 | 1.00145.68 | C |
| ATOM | 5545 | CD  | LYS | 697 | -45.324 | 56.503 | 35.486 | 1.00145.68 | C |
| ATOM | 5546 | CE  | LYS | 697 | -45.393 | 57.808 | 34.694 | 1.00145.68 | C |
| ATOM | 5547 | NZ  | LYS | 697 | -44.989 | 58.943 | 35.554 | 1.00145.68 | N |
| ATOM | 5548 | C   | LYS | 697 | -43.819 | 52.850 | 36.891 | 1.00145.68 | C |

|      |      |     |     |     |         |        |        |            |   |
|------|------|-----|-----|-----|---------|--------|--------|------------|---|
| ATOM | 5549 | O   | LYS | 697 | -43.748 | 51.638 | 36.698 | 1.00145.68 | O |
| ATOM | 5550 | N   | PRO | 698 | -43.828 | 53.390 | 38.087 | 1.00 74.79 | N |
| ATOM | 5551 | CA  | PRO | 698 | -43.713 | 52.578 | 39.268 | 1.00 74.79 | C |
| ATOM | 5552 | CD  | PRO | 698 | -43.259 | 54.714 | 38.291 | 1.00 74.79 | C |
| ATOM | 5553 | CB  | PRO | 698 | -43.438 | 53.545 | 40.417 | 1.00 74.79 | C |
| ATOM | 5554 | CG  | PRO | 698 | -42.710 | 54.714 | 39.729 | 1.00 74.79 | C |
| ATOM | 5555 | C   | PRO | 698 | -44.910 | 51.708 | 39.468 | 1.00 74.79 | C |
| ATOM | 5556 | O   | PRO | 698 | -46.015 | 52.098 | 39.092 | 1.00 74.79 | O |
| ATOM | 5557 | N   | SER | 699 | -44.698 | 50.514 | 40.056 | 1.00 98.54 | N |
| ATOM | 5558 | CA  | SER | 699 | -45.757 | 49.574 | 40.258 | 1.00 98.54 | C |
| ATOM | 5559 | CB  | SER | 699 | -45.251 | 48.121 | 40.392 | 1.00 98.54 | C |
| ATOM | 5560 | OG  | SER | 699 | -44.107 | 48.059 | 41.230 | 1.00 98.54 | O |
| ATOM | 5561 | C   | SER | 699 | -46.572 | 49.972 | 41.444 | 1.00 98.54 | C |
| ATOM | 5562 | O   | SER | 699 | -46.106 | 50.676 | 42.338 | 1.00 98.54 | O |
| ATOM | 5563 | N   | THR | 700 | -47.847 | 49.544 | 41.467 | 1.00116.36 | N |
| ATOM | 5564 | CA  | THR | 700 | -48.657 | 49.919 | 42.582 | 1.00116.36 | C |
| ATOM | 5565 | CB  | THR | 700 | -49.949 | 50.568 | 42.202 | 1.00116.36 | C |
| ATOM | 5566 | OG1 | THR | 700 | -50.493 | 51.238 | 43.326 | 1.00116.36 | O |
| ATOM | 5567 | CG2 | THR | 700 | -50.917 | 49.482 | 41.709 | 1.00116.36 | C |
| ATOM | 5568 | C   | THR | 700 | -48.956 | 48.674 | 43.354 | 1.00116.36 | C |
| ATOM | 5569 | O   | THR | 700 | -49.166 | 47.608 | 42.777 | 1.00116.36 | O |
| ATOM | 5570 | N   | GLY | 701 | -48.975 | 48.791 | 44.696 | 1.00 44.63 | N |
| ATOM | 5571 | CA  | GLY | 701 | -49.164 | 47.642 | 45.533 | 1.00 44.63 | C |
| ATOM | 5572 | C   | GLY | 701 | -50.395 | 47.828 | 46.366 | 1.00 44.63 | C |
| ATOM | 5573 | O   | GLY | 701 | -51.096 | 48.833 | 46.248 | 1.00 44.63 | O |
| ATOM | 5574 | N   | TRP | 702 | -50.685 | 46.832 | 47.234 | 1.00 85.25 | N |
| ATOM | 5575 | CA  | TRP | 702 | -51.860 | 46.856 | 48.062 | 1.00 85.25 | C |
| ATOM | 5576 | CB  | TRP | 702 | -52.838 | 45.710 | 47.757 | 1.00 85.25 | C |
| ATOM | 5577 | CG  | TRP | 702 | -53.532 | 45.801 | 46.422 | 1.00 85.25 | C |
| ATOM | 5578 | CD2 | TRP | 702 | -53.012 | 45.268 | 45.195 | 1.00 85.25 | C |
| ATOM | 5579 | CD1 | TRP | 702 | -54.737 | 46.363 | 46.121 | 1.00 85.25 | C |
| ATOM | 5580 | NE1 | TRP | 702 | -55.004 | 46.212 | 44.783 | 1.00 85.25 | N |
| ATOM | 5581 | CE2 | TRP | 702 | -53.950 | 45.541 | 44.200 | 1.00 85.25 | C |
| ATOM | 5582 | CE3 | TRP | 702 | -51.851 | 44.606 | 44.918 | 1.00 85.25 | C |
| ATOM | 5583 | CZ2 | TRP | 702 | -53.740 | 45.154 | 42.908 | 1.00 85.25 | C |
| ATOM | 5584 | CZ3 | TRP | 702 | -51.642 | 44.218 | 43.614 | 1.00 85.25 | C |
| ATOM | 5585 | CH2 | TRP | 702 | -52.569 | 44.486 | 42.629 | 1.00 85.25 | C |
| ATOM | 5586 | C   | TRP | 702 | -51.476 | 46.659 | 49.499 | 1.00 85.25 | C |
| ATOM | 5587 | O   | TRP | 702 | -50.565 | 45.896 | 49.816 | 1.00 85.25 | O |
| ATOM | 5588 | N   | SER | 703 | -52.144 | 47.409 | 50.401 | 1.00 48.40 | N |
| ATOM | 5589 | CA  | SER | 703 | -51.990 | 47.266 | 51.824 | 1.00 48.40 | C |
| ATOM | 5590 | CB  | SER | 703 | -52.461 | 48.504 | 52.607 | 1.00 48.40 | C |
| ATOM | 5591 | OG  | SER | 703 | -51.627 | 49.614 | 52.318 | 1.00 48.40 | O |
| ATOM | 5592 | C   | SER | 703 | -52.822 | 46.110 | 52.302 | 1.00 48.40 | C |
| ATOM | 5593 | O   | SER | 703 | -52.492 | 45.458 | 53.292 | 1.00 48.40 | O |
| ATOM | 5594 | N   | ASN | 704 | -53.944 | 45.835 | 51.609 | 1.00 59.88 | N |
| ATOM | 5595 | CA  | ASN | 704 | -54.848 | 44.806 | 52.042 | 1.00 59.88 | C |
| ATOM | 5596 | CB  | ASN | 704 | -56.323 | 45.218 | 51.865 | 1.00 59.88 | C |
| ATOM | 5597 | CG  | ASN | 704 | -57.224 | 44.229 | 52.592 | 1.00 59.88 | C |
| ATOM | 5598 | OD1 | ASN | 704 | -56.880 | 43.060 | 52.756 | 1.00 59.88 | O |
| ATOM | 5599 | ND2 | ASN | 704 | -58.416 | 44.709 | 53.036 | 1.00 59.88 | N |
| ATOM | 5600 | C   | ASN | 704 | -54.602 | 43.590 | 51.203 | 1.00 59.88 | C |
| ATOM | 5601 | O   | ASN | 704 | -54.710 | 43.631 | 49.980 | 1.00 59.88 | O |
| ATOM | 5602 | N   | TRP | 705 | -54.289 | 42.463 | 51.865 | 1.00 79.75 | N |
| ATOM | 5603 | CA  | TRP | 705 | -53.972 | 41.215 | 51.228 | 1.00 79.75 | C |
| ATOM | 5604 | CB  | TRP | 705 | -53.511 | 40.140 | 52.229 | 1.00 79.75 | C |
| ATOM | 5605 | CG  | TRP | 705 | -54.520 | 39.772 | 53.290 | 1.00 79.75 | C |
| ATOM | 5606 | CD2 | TRP | 705 | -55.461 | 38.695 | 53.158 | 1.00 79.75 | C |
| ATOM | 5607 | CD1 | TRP | 705 | -54.728 | 40.318 | 54.523 | 1.00 79.75 | C |
| ATOM | 5608 | NE1 | TRP | 705 | -55.740 | 39.648 | 55.169 | 1.00 79.75 | N |
| ATOM | 5609 | CE2 | TRP | 705 | -56.198 | 38.646 | 54.340 | 1.00 79.75 | C |
| ATOM | 5610 | CE3 | TRP | 705 | -55.686 | 37.816 | 52.138 | 1.00 79.75 | C |
| ATOM | 5611 | CZ2 | TRP | 705 | -57.177 | 37.711 | 54.517 | 1.00 79.75 | C |
| ATOM | 5612 | CZ3 | TRP | 705 | -56.677 | 36.878 | 52.319 | 1.00 79.75 | C |
| ATOM | 5613 | CH2 | TRP | 705 | -57.409 | 36.826 | 53.487 | 1.00 79.75 | C |
| ATOM | 5614 | C   | TRP | 705 | -55.174 | 40.717 | 50.494 | 1.00 79.75 | C |

|      |      |     |     |     |         |        |        |      |        |   |
|------|------|-----|-----|-----|---------|--------|--------|------|--------|---|
| ATOM | 5615 | O   | TRP | 705 | -55.061 | 39.978 | 49.518 | 1.00 | 79.75  | O |
| ATOM | 5616 | N   | GLU | 706 | -56.374 | 41.084 | 50.971 | 1.00 | 75.71  | N |
| ATOM | 5617 | CA  | GLU | 706 | -57.588 | 40.634 | 50.359 | 1.00 | 75.71  | C |
| ATOM | 5618 | CB  | GLU | 706 | -58.843 | 41.068 | 51.139 | 1.00 | 75.71  | C |
| ATOM | 5619 | CG  | GLU | 706 | -58.990 | 40.331 | 52.474 | 1.00 | 75.71  | C |
| ATOM | 5620 | CD  | GLU | 706 | -60.247 | 40.831 | 53.173 | 1.00 | 75.71  | C |
| ATOM | 5621 | OE1 | GLU | 706 | -60.805 | 41.865 | 52.719 | 1.00 | 75.71  | O |
| ATOM | 5622 | OE2 | GLU | 706 | -60.663 | 40.188 | 54.173 | 1.00 | 75.71  | O |
| ATOM | 5623 | C   | GLU | 706 | -57.679 | 41.170 | 48.956 | 1.00 | 75.71  | C |
| ATOM | 5624 | O   | GLU | 706 | -58.324 | 40.579 | 48.093 | 1.00 | 75.71  | O |
| ATOM | 5625 | N   | GLU | 707 | -57.088 | 42.349 | 48.719 | 1.00 | 120.77 | N |
| ATOM | 5626 | CA  | GLU | 707 | -57.083 | 43.057 | 47.465 | 1.00 | 120.77 | C |
| ATOM | 5627 | CB  | GLU | 707 | -56.653 | 44.522 | 47.658 | 1.00 | 120.77 | C |
| ATOM | 5628 | CG  | GLU | 707 | -57.572 | 45.315 | 48.595 | 1.00 | 120.77 | C |
| ATOM | 5629 | CD  | GLU | 707 | -58.629 | 46.047 | 47.779 | 1.00 | 120.77 | C |
| ATOM | 5630 | OE1 | GLU | 707 | -58.387 | 46.283 | 46.565 | 1.00 | 120.77 | O |
| ATOM | 5631 | OE2 | GLU | 707 | -59.689 | 46.393 | 48.366 | 1.00 | 120.77 | O |
| ATOM | 5632 | C   | GLU | 707 | -56.175 | 42.441 | 46.421 | 1.00 | 120.77 | C |
| ATOM | 5633 | O   | GLU | 707 | -56.378 | 42.679 | 45.231 | 1.00 | 120.77 | O |
| ATOM | 5634 | N   | VAL | 708 | -55.113 | 41.697 | 46.811 | 1.00 | 160.04 | N |
| ATOM | 5635 | CA  | VAL | 708 | -54.134 | 41.238 | 45.844 | 1.00 | 160.04 | C |
| ATOM | 5636 | CB  | VAL | 708 | -52.823 | 40.802 | 46.432 | 1.00 | 160.04 | C |
| ATOM | 5637 | CG1 | VAL | 708 | -52.036 | 42.032 | 46.880 | 1.00 | 160.04 | C |
| ATOM | 5638 | CG2 | VAL | 708 | -53.110 | 39.839 | 47.589 | 1.00 | 160.04 | C |
| ATOM | 5639 | C   | VAL | 708 | -54.608 | 40.114 | 44.970 | 1.00 | 160.04 | C |
| ATOM | 5640 | O   | VAL | 708 | -55.174 | 39.120 | 45.421 | 1.00 | 160.04 | O |
| ATOM | 5641 | N   | PRO | 709 | -54.374 | 40.297 | 43.687 | 1.00 | 104.66 | N |
| ATOM | 5642 | CA  | PRO | 709 | -54.689 | 39.286 | 42.711 | 1.00 | 104.66 | C |
| ATOM | 5643 | CB  | PRO | 709 | -54.397 | 41.628 | 43.107 | 1.00 | 104.66 | C |
| ATOM | 5644 | CD  | PRO | 709 | -54.918 | 40.014 | 41.387 | 1.00 | 104.66 | C |
| ATOM | 5645 | CG  | PRO | 709 | -54.267 | 41.391 | 41.594 | 1.00 | 104.66 | C |
| ATOM | 5646 | C   | PRO | 709 | -53.619 | 38.244 | 42.631 | 1.00 | 104.66 | C |
| ATOM | 5647 | O   | PRO | 709 | -52.439 | 38.590 | 42.632 | 1.00 | 104.66 | O |
| ATOM | 5648 | N   | PHE | 710 | -54.006 | 36.961 | 42.526 | 1.00 | 105.95 | N |
| ATOM | 5649 | CA  | PHE | 710 | -53.040 | 35.917 | 42.389 | 1.00 | 105.95 | C |
| ATOM | 5650 | CB  | PHE | 710 | -52.453 | 35.507 | 43.758 | 1.00 | 105.95 | C |
| ATOM | 5651 | CG  | PHE | 710 | -51.438 | 34.429 | 43.591 | 1.00 | 105.95 | C |
| ATOM | 5652 | CD1 | PHE | 710 | -50.253 | 34.677 | 42.937 | 1.00 | 105.95 | C |
| ATOM | 5653 | CD2 | PHE | 710 | -51.654 | 33.181 | 44.125 | 1.00 | 105.95 | C |
| ATOM | 5654 | CE1 | PHE | 710 | -49.311 | 33.686 | 42.792 | 1.00 | 105.95 | C |
| ATOM | 5655 | CE2 | PHE | 710 | -50.715 | 32.185 | 43.983 | 1.00 | 105.95 | C |
| ATOM | 5656 | CZ  | PHE | 710 | -49.543 | 32.435 | 43.313 | 1.00 | 105.95 | C |
| ATOM | 5657 | C   | PHE | 710 | -53.772 | 34.768 | 41.774 | 1.00 | 105.95 | C |
| ATOM | 5658 | O   | PHE | 710 | -54.841 | 34.383 | 42.245 | 1.00 | 105.95 | O |
| ATOM | 5659 | N   | CYS | 711 | -53.202 | 34.186 | 40.701 | 1.00 | 82.11  | N |
| ATOM | 5660 | CA  | CYS | 711 | -53.821 | 33.087 | 40.017 | 1.00 | 82.11  | C |
| ATOM | 5661 | CB  | CYS | 711 | -53.845 | 31.795 | 40.852 | 1.00 | 82.11  | C |
| ATOM | 5662 | SG  | CYS | 711 | -52.174 | 31.175 | 41.203 | 1.00 | 82.11  | S |
| ATOM | 5663 | C   | CYS | 711 | -55.235 | 33.430 | 39.627 | 1.00 | 82.11  | C |
| ATOM | 5664 | O   | CYS | 711 | -56.153 | 32.639 | 39.835 | 1.00 | 82.11  | O |
| ATOM | 5665 | N   | SER | 712 | -55.443 | 34.624 | 39.037 | 1.00 | 81.43  | N |
| ATOM | 5666 | CA  | SER | 712 | -56.719 | 35.042 | 38.510 | 1.00 | 81.43  | C |
| ATOM | 5667 | CB  | SER | 712 | -57.263 | 34.074 | 37.445 | 1.00 | 81.43  | C |
| ATOM | 5668 | OG  | SER | 712 | -56.380 | 34.023 | 36.334 | 1.00 | 81.43  | O |
| ATOM | 5669 | C   | SER | 712 | -57.766 | 35.176 | 39.574 | 1.00 | 81.43  | C |
| ATOM | 5670 | O   | SER | 712 | -58.958 | 35.201 | 39.267 | 1.00 | 81.43  | O |
| ATOM | 5671 | N   | HIS | 713 | -57.368 | 35.305 | 40.853 | 1.00 | 92.39  | N |
| ATOM | 5672 | CA  | HIS | 713 | -58.388 | 35.449 | 41.852 | 1.00 | 92.39  | C |
| ATOM | 5673 | ND1 | HIS | 713 | -58.742 | 32.397 | 40.657 | 1.00 | 92.39  | N |
| ATOM | 5674 | CG  | HIS | 713 | -59.428 | 33.171 | 41.566 | 1.00 | 92.39  | C |
| ATOM | 5675 | CB  | HIS | 713 | -58.776 | 34.122 | 42.522 | 1.00 | 92.39  | C |
| ATOM | 5676 | NE2 | HIS | 713 | -60.896 | 31.943 | 40.374 | 1.00 | 92.39  | N |
| ATOM | 5677 | CD2 | HIS | 713 | -60.745 | 32.880 | 41.380 | 1.00 | 92.39  | C |
| ATOM | 5678 | CE1 | HIS | 713 | -59.668 | 31.683 | 39.971 | 1.00 | 92.39  | C |
| ATOM | 5679 | C   | HIS | 713 | -57.911 | 36.365 | 42.933 | 1.00 | 92.39  | C |
| ATOM | 5680 | O   | HIS | 713 | -56.731 | 36.696 | 43.020 | 1.00 | 92.39  | O |

|      |      |     |     |     |         |        |        |      |        |   |
|------|------|-----|-----|-----|---------|--------|--------|------|--------|---|
| ATOM | 5681 | N   | HIS | 714 | -58.866 | 36.832 | 43.763 | 1.00 | 92.97  | N |
| ATOM | 5682 | CA  | HIS | 714 | -58.580 | 37.617 | 44.933 | 1.00 | 92.97  | C |
| ATOM | 5683 | ND1 | HIS | 714 | -60.804 | 39.374 | 43.002 | 1.00 | 92.97  | N |
| ATOM | 5684 | CG  | HIS | 714 | -60.541 | 39.146 | 44.335 | 1.00 | 92.97  | C |
| ATOM | 5685 | CB  | HIS | 714 | -59.158 | 39.044 | 44.903 | 1.00 | 92.97  | C |
| ATOM | 5686 | NE2 | HIS | 714 | -62.772 | 39.238 | 44.022 | 1.00 | 92.97  | N |
| ATOM | 5687 | CD2 | HIS | 714 | -61.754 | 39.065 | 44.944 | 1.00 | 92.97  | C |
| ATOM | 5688 | CE1 | HIS | 714 | -62.153 | 39.421 | 42.871 | 1.00 | 92.97  | C |
| ATOM | 5689 | C   | HIS | 714 | -59.180 | 36.839 | 46.066 | 1.00 | 92.97  | C |
| ATOM | 5690 | O   | HIS | 714 | -59.998 | 35.957 | 45.827 | 1.00 | 92.97  | O |
| ATOM | 5691 | N   | PHE | 715 | -58.785 | 37.111 | 47.329 | 1.00 | 87.88  | N |
| ATOM | 5692 | CA  | PHE | 715 | -59.238 | 36.255 | 48.398 | 1.00 | 87.88  | C |
| ATOM | 5693 | CB  | PHE | 715 | -58.065 | 35.515 | 49.058 | 1.00 | 87.88  | C |
| ATOM | 5694 | CG  | PHE | 715 | -57.327 | 34.827 | 47.962 | 1.00 | 87.88  | C |
| ATOM | 5695 | CD1 | PHE | 715 | -56.380 | 35.512 | 47.235 | 1.00 | 87.88  | C |
| ATOM | 5696 | CD2 | PHE | 715 | -57.577 | 33.512 | 47.655 | 1.00 | 87.88  | C |
| ATOM | 5697 | CE1 | PHE | 715 | -55.691 | 34.892 | 46.218 | 1.00 | 87.88  | C |
| ATOM | 5698 | CE2 | PHE | 715 | -56.891 | 32.888 | 46.640 | 1.00 | 87.88  | C |
| ATOM | 5699 | CZ  | PHE | 715 | -55.946 | 33.577 | 45.920 | 1.00 | 87.88  | C |
| ATOM | 5700 | C   | PHE | 715 | -59.876 | 37.079 | 49.483 | 1.00 | 87.88  | C |
| ATOM | 5701 | O   | PHE | 715 | -59.428 | 38.186 | 49.775 | 1.00 | 87.88  | O |
| ATOM | 5702 | N   | ASN | 716 | -60.935 | 36.540 | 50.136 | 1.00 | 62.94  | N |
| ATOM | 5703 | CA  | ASN | 716 | -61.605 | 37.276 | 51.174 | 1.00 | 62.94  | C |
| ATOM | 5704 | CB  | ASN | 716 | -63.027 | 37.703 | 50.777 | 1.00 | 62.94  | C |
| ATOM | 5705 | CG  | ASN | 716 | -62.896 | 38.673 | 49.611 | 1.00 | 62.94  | C |
| ATOM | 5706 | OD1 | ASN | 716 | -62.481 | 38.292 | 48.518 | 1.00 | 62.94  | O |
| ATOM | 5707 | ND2 | ASN | 716 | -63.257 | 39.963 | 49.846 | 1.00 | 62.94  | N |
| ATOM | 5708 | C   | ASN | 716 | -61.718 | 36.438 | 52.416 | 1.00 | 62.94  | C |
| ATOM | 5709 | O   | ASN | 716 | -61.789 | 35.212 | 52.356 | 1.00 | 62.94  | O |
| ATOM | 5710 | N   | LYS | 717 | -61.725 | 37.105 | 53.593 | 1.00 | 125.78 | N |
| ATOM | 5711 | CA  | LYS | 717 | -61.878 | 36.422 | 54.850 | 1.00 | 125.78 | C |
| ATOM | 5712 | CB  | LYS | 717 | -61.067 | 37.044 | 56.000 | 1.00 | 125.78 | C |
| ATOM | 5713 | CG  | LYS | 717 | -59.569 | 36.755 | 55.948 | 1.00 | 125.78 | C |
| ATOM | 5714 | CD  | LYS | 717 | -59.230 | 35.273 | 56.106 | 1.00 | 125.78 | C |
| ATOM | 5715 | CE  | LYS | 717 | -59.381 | 34.753 | 57.537 | 1.00 | 125.78 | C |
| ATOM | 5716 | NZ  | LYS | 717 | -59.065 | 33.307 | 57.587 | 1.00 | 125.78 | N |
| ATOM | 5717 | C   | LYS | 717 | -63.318 | 36.553 | 55.241 | 1.00 | 125.78 | C |
| ATOM | 5718 | O   | LYS | 717 | -63.843 | 37.661 | 55.336 | 1.00 | 125.78 | O |
| ATOM | 5719 | N   | LEU | 718 | -63.991 | 35.408 | 55.489 | 1.00 | 76.09  | N |
| ATOM | 5720 | CA  | LEU | 718 | -65.389 | 35.389 | 55.826 | 1.00 | 76.09  | C |
| ATOM | 5721 | CB  | LEU | 718 | -66.205 | 34.431 | 54.936 | 1.00 | 76.09  | C |
| ATOM | 5722 | CG  | LEU | 718 | -66.315 | 34.830 | 53.454 | 1.00 | 76.09  | C |
| ATOM | 5723 | CD1 | LEU | 718 | -67.102 | 33.780 | 52.654 | 1.00 | 76.09  | C |
| ATOM | 5724 | CD2 | LEU | 718 | -66.918 | 36.234 | 53.307 | 1.00 | 76.09  | C |
| ATOM | 5725 | C   | LEU | 718 | -65.533 | 34.818 | 57.198 | 1.00 | 76.09  | C |
| ATOM | 5726 | O   | LEU | 718 | -64.810 | 33.900 | 57.576 | 1.00 | 76.09  | O |
| ATOM | 5727 | N   | TYR | 719 | -66.492 | 35.342 | 57.984 | 1.00 | 102.91 | N |
| ATOM | 5728 | CA  | TYR | 719 | -66.707 | 34.778 | 59.282 | 1.00 | 102.91 | C |
| ATOM | 5729 | CB  | TYR | 719 | -66.664 | 35.811 | 60.419 | 1.00 | 102.91 | C |
| ATOM | 5730 | CG  | TYR | 719 | -65.233 | 36.217 | 60.494 | 1.00 | 102.91 | C |
| ATOM | 5731 | CD1 | TYR | 719 | -64.722 | 37.158 | 59.629 | 1.00 | 102.91 | C |
| ATOM | 5732 | CD2 | TYR | 719 | -64.397 | 35.642 | 61.423 | 1.00 | 102.91 | C |
| ATOM | 5733 | CE1 | TYR | 719 | -63.398 | 37.523 | 59.695 | 1.00 | 102.91 | C |
| ATOM | 5734 | CE2 | TYR | 719 | -63.073 | 36.004 | 61.494 | 1.00 | 102.91 | C |
| ATOM | 5735 | CZ  | TYR | 719 | -62.572 | 36.946 | 60.629 | 1.00 | 102.91 | C |
| ATOM | 5736 | OH  | TYR | 719 | -61.212 | 37.318 | 60.699 | 1.00 | 102.91 | O |
| ATOM | 5737 | C   | TYR | 719 | -68.030 | 34.083 | 59.260 | 1.00 | 102.91 | C |
| ATOM | 5738 | O   | TYR | 719 | -69.050 | 34.656 | 58.878 | 1.00 | 102.91 | O |
| ATOM | 5739 | N   | LEU | 720 | -68.025 | 32.798 | 59.661 | 1.00 | 91.79  | N |
| ATOM | 5740 | CA  | LEU | 720 | -69.203 | 31.980 | 59.643 | 1.00 | 91.79  | C |
| ATOM | 5741 | CB  | LEU | 720 | -68.919 | 30.468 | 59.659 | 1.00 | 91.79  | C |
| ATOM | 5742 | CG  | LEU | 720 | -68.239 | 29.945 | 58.381 | 1.00 | 91.79  | C |
| ATOM | 5743 | CD1 | LEU | 720 | -66.841 | 30.554 | 58.195 | 1.00 | 91.79  | C |
| ATOM | 5744 | CD2 | LEU | 720 | -68.231 | 28.408 | 58.346 | 1.00 | 91.79  | C |
| ATOM | 5745 | C   | LEU | 720 | -70.056 | 32.294 | 60.831 | 1.00 | 91.79  | C |
| ATOM | 5746 | O   | LEU | 720 | -69.668 | 33.041 | 61.727 | 1.00 | 91.79  | O |

|      |      |     |     |     |         |        |        |      |        |   |
|------|------|-----|-----|-----|---------|--------|--------|------|--------|---|
| ATOM | 5747 | N   | LYS | 721 | -71.274 | 31.723 | 60.826 | 1.00 | 43.76  | N |
| ATOM | 5748 | CA  | LYS | 721 | -72.268 | 31.898 | 61.844 | 1.00 | 43.76  | C |
| ATOM | 5749 | CB  | LYS | 721 | -73.507 | 31.045 | 61.519 | 1.00 | 43.76  | C |
| ATOM | 5750 | CG  | LYS | 721 | -74.660 | 31.124 | 62.515 | 1.00 | 43.76  | C |
| ATOM | 5751 | CD  | LYS | 721 | -75.933 | 30.473 | 61.968 | 1.00 | 43.76  | C |
| ATOM | 5752 | CE  | LYS | 721 | -77.074 | 30.375 | 62.980 | 1.00 | 43.76  | C |
| ATOM | 5753 | NZ  | LYS | 721 | -78.248 | 29.733 | 62.348 | 1.00 | 43.76  | N |
| ATOM | 5754 | C   | LYS | 721 | -71.692 | 31.416 | 63.140 | 1.00 | 43.76  | C |
| ATOM | 5755 | O   | LYS | 721 | -71.870 | 32.044 | 64.183 | 1.00 | 43.76  | O |
| ATOM | 5756 | N   | ASP | 722 | -70.977 | 30.279 | 63.089 | 1.00 | 103.30 | N |
| ATOM | 5757 | CA  | ASP | 722 | -70.366 | 29.660 | 64.231 | 1.00 | 103.30 | C |
| ATOM | 5758 | CB  | ASP | 722 | -69.991 | 28.175 | 64.003 | 1.00 | 103.30 | C |
| ATOM | 5759 | CG  | ASP | 722 | -69.100 | 27.993 | 62.783 | 1.00 | 103.30 | C |
| ATOM | 5760 | OD1 | ASP | 722 | -68.234 | 28.867 | 62.524 | 1.00 | 103.30 | O |
| ATOM | 5761 | OD2 | ASP | 722 | -69.291 | 26.965 | 62.080 | 1.00 | 103.30 | O |
| ATOM | 5762 | C   | ASP | 722 | -69.213 | 30.478 | 64.737 | 1.00 | 103.30 | C |
| ATOM | 5763 | O   | ASP | 722 | -68.764 | 30.272 | 65.864 | 1.00 | 103.30 | O |
| ATOM | 5764 | N   | GLY | 723 | -68.666 | 31.401 | 63.921 | 1.00 | 31.63  | N |
| ATOM | 5765 | CA  | GLY | 723 | -67.611 | 32.245 | 64.420 | 1.00 | 31.63  | C |
| ATOM | 5766 | C   | GLY | 723 | -66.302 | 31.842 | 63.815 | 1.00 | 31.63  | C |
| ATOM | 5767 | O   | GLY | 723 | -65.291 | 32.515 | 64.009 | 1.00 | 31.63  | O |
| ATOM | 5768 | N   | ARG | 724 | -66.287 | 30.728 | 63.064 | 1.00 | 158.96 | N |
| ATOM | 5769 | CA  | ARG | 724 | -65.088 | 30.258 | 62.433 | 1.00 | 158.96 | C |
| ATOM | 5770 | CB  | ARG | 724 | -65.234 | 28.794 | 61.981 | 1.00 | 158.96 | C |
| ATOM | 5771 | CG  | ARG | 724 | -65.441 | 27.850 | 63.171 | 1.00 | 158.96 | C |
| ATOM | 5772 | CD  | ARG | 724 | -66.399 | 26.689 | 62.889 | 1.00 | 158.96 | C |
| ATOM | 5773 | NE  | ARG | 724 | -65.636 | 25.577 | 62.271 | 1.00 | 158.96 | N |
| ATOM | 5774 | CZ  | ARG | 724 | -66.290 | 24.626 | 61.543 | 1.00 | 158.96 | C |
| ATOM | 5775 | NH1 | ARG | 724 | -67.629 | 24.737 | 61.300 | 1.00 | 158.96 | N |
| ATOM | 5776 | NH2 | ARG | 724 | -65.593 | 23.560 | 61.056 | 1.00 | 158.96 | N |
| ATOM | 5777 | C   | ARG | 724 | -64.838 | 31.124 | 61.230 | 1.00 | 158.96 | C |
| ATOM | 5778 | O   | ARG | 724 | -65.762 | 31.728 | 60.687 | 1.00 | 158.96 | O |
| ATOM | 5779 | N   | SER | 725 | -63.563 | 31.228 | 60.795 | 1.00 | 47.79  | N |
| ATOM | 5780 | CA  | SER | 725 | -63.224 | 32.076 | 59.684 | 1.00 | 47.79  | C |
| ATOM | 5781 | CB  | SER | 725 | -62.131 | 33.101 | 60.028 | 1.00 | 47.79  | C |
| ATOM | 5782 | OG  | SER | 725 | -60.954 | 32.428 | 60.448 | 1.00 | 47.79  | O |
| ATOM | 5783 | C   | SER | 725 | -62.717 | 31.233 | 58.549 | 1.00 | 47.79  | C |
| ATOM | 5784 | O   | SER | 725 | -62.045 | 30.225 | 58.746 | 1.00 | 47.79  | O |
| ATOM | 5785 | N   | ILE | 726 | -63.043 | 31.652 | 57.312 | 1.00 | 169.48 | N |
| ATOM | 5786 | CA  | ILE | 726 | -62.700 | 30.953 | 56.103 | 1.00 | 169.48 | C |
| ATOM | 5787 | CB  | ILE | 726 | -63.960 | 30.469 | 55.441 | 1.00 | 169.48 | C |
| ATOM | 5788 | CG1 | ILE | 726 | -63.740 | 29.527 | 54.251 | 1.00 | 169.48 | C |
| ATOM | 5789 | CG2 | ILE | 726 | -64.771 | 31.723 | 55.114 | 1.00 | 169.48 | C |
| ATOM | 5790 | CD1 | ILE | 726 | -63.495 | 28.074 | 54.646 | 1.00 | 169.48 | C |
| ATOM | 5791 | C   | ILE | 726 | -62.056 | 31.950 | 55.174 | 1.00 | 169.48 | C |
| ATOM | 5792 | O   | ILE | 726 | -62.393 | 33.132 | 55.207 | 1.00 | 169.48 | O |
| ATOM | 5793 | N   | VAL | 727 | -61.076 | 31.511 | 54.352 | 1.00 | 71.16  | N |
| ATOM | 5794 | CA  | VAL | 727 | -60.483 | 32.379 | 53.358 | 1.00 | 71.16  | C |
| ATOM | 5795 | CB  | VAL | 727 | -58.982 | 32.366 | 53.356 | 1.00 | 71.16  | C |
| ATOM | 5796 | CG1 | VAL | 727 | -58.486 | 33.268 | 52.213 | 1.00 | 71.16  | C |
| ATOM | 5797 | CG2 | VAL | 727 | -58.472 | 32.777 | 54.744 | 1.00 | 71.16  | C |
| ATOM | 5798 | C   | VAL | 727 | -60.892 | 31.822 | 52.026 | 1.00 | 71.16  | C |
| ATOM | 5799 | O   | VAL | 727 | -60.474 | 30.722 | 51.668 | 1.00 | 71.16  | O |
| ATOM | 5800 | N   | VAL | 728 | -61.677 | 32.582 | 51.230 | 1.00 | 69.54  | N |
| ATOM | 5801 | CA  | VAL | 728 | -62.207 | 32.040 | 50.000 | 1.00 | 69.54  | C |
| ATOM | 5802 | CB  | VAL | 728 | -63.709 | 32.036 | 49.977 | 1.00 | 69.54  | C |
| ATOM | 5803 | CG1 | VAL | 728 | -64.221 | 31.125 | 51.106 | 1.00 | 69.54  | C |
| ATOM | 5804 | CG2 | VAL | 728 | -64.202 | 33.490 | 50.093 | 1.00 | 69.54  | C |
| ATOM | 5805 | C   | VAL | 728 | -61.754 | 32.842 | 48.807 | 1.00 | 69.54  | C |
| ATOM | 5806 | O   | VAL | 728 | -61.404 | 34.013 | 48.921 | 1.00 | 69.54  | O |
| ATOM | 5807 | N   | PRO | 729 | -61.704 | 32.206 | 47.653 | 1.00 | 114.19 | N |
| ATOM | 5808 | CA  | PRO | 729 | -61.340 | 32.902 | 46.438 | 1.00 | 114.19 | C |
| ATOM | 5809 | CD  | PRO | 729 | -61.381 | 30.792 | 47.584 | 1.00 | 114.19 | C |
| ATOM | 5810 | CB  | PRO | 729 | -60.764 | 31.843 | 45.495 | 1.00 | 114.19 | C |
| ATOM | 5811 | CG  | PRO | 729 | -61.251 | 30.506 | 46.079 | 1.00 | 114.19 | C |
| ATOM | 5812 | C   | PRO | 729 | -62.498 | 33.653 | 45.828 | 1.00 | 114.19 | C |



|      |      |     |     |     |         |        |        |            |   |
|------|------|-----|-----|-----|---------|--------|--------|------------|---|
| ATOM | 5813 | O   | PRO | 729 | -63.623 | 33.169 | 45.938 | 1.00114.19 | O |
| ATOM | 5814 | N   | CYS | 730 | -62.256 | 34.820 | 45.175 | 1.00118.48 | N |
| ATOM | 5815 | CA  | CYS | 730 | -63.293 | 35.543 | 44.461 | 1.00118.48 | C |
| ATOM | 5816 | CB  | CYS | 730 | -63.961 | 36.823 | 45.108 | 1.00118.48 | C |
| ATOM | 5817 | SG  | CYS | 730 | -65.421 | 37.486 | 44.149 | 1.00118.48 | S |
| ATOM | 5818 | C   | CYS | 730 | -62.698 | 36.074 | 43.198 | 1.00118.48 | C |
| ATOM | 5819 | O   | CYS | 730 | -61.482 | 36.227 | 43.069 | 1.00118.48 | O |
| ATOM | 5820 | N   | ARG | 731 | -63.577 | 36.339 | 42.212 | 1.00119.17 | N |
| ATOM | 5821 | CA  | ARG | 731 | -63.187 | 36.955 | 40.980 | 1.00119.17 | C |
| ATOM | 5822 | CB  | ARG | 731 | -62.595 | 35.980 | 39.945 | 1.00119.17 | C |
| ATOM | 5823 | CG  | ARG | 731 | -63.538 | 34.861 | 39.502 | 1.00119.17 | C |
| ATOM | 5824 | CD  | ARG | 731 | -62.848 | 33.832 | 38.603 | 1.00119.17 | C |
| ATOM | 5825 | NE  | ARG | 731 | -62.276 | 34.572 | 37.441 | 1.00119.17 | N |
| ATOM | 5826 | CZ  | ARG | 731 | -61.318 | 33.994 | 36.660 | 1.00119.17 | C |
| ATOM | 5827 | NH1 | ARG | 731 | -60.901 | 32.720 | 36.916 | 1.00119.17 | N |
| ATOM | 5828 | NH2 | ARG | 731 | -60.774 | 34.692 | 35.621 | 1.00119.17 | N |
| ATOM | 5829 | C   | ARG | 731 | -64.428 | 37.575 | 40.408 | 1.00119.17 | C |
| ATOM | 5830 | O   | ARG | 731 | -65.529 | 37.324 | 40.895 | 1.00119.17 | O |
| ATOM | 5831 | N   | HIS | 732 | -64.284 | 38.406 | 39.356 | 1.00 52.07 | N |
| ATOM | 5832 | CA  | HIS | 732 | -65.423 | 39.084 | 38.794 | 1.00 52.07 | C |
| ATOM | 5833 | ND1 | HIS | 732 | -64.700 | 42.351 | 38.144 | 1.00 52.07 | N |
| ATOM | 5834 | CG  | HIS | 732 | -64.215 | 41.103 | 37.818 | 1.00 52.07 | C |
| ATOM | 5835 | CB  | HIS | 732 | -65.084 | 39.911 | 37.538 | 1.00 52.07 | C |
| ATOM | 5836 | NE2 | HIS | 732 | -62.483 | 42.518 | 38.127 | 1.00 52.07 | N |
| ATOM | 5837 | CD2 | HIS | 732 | -62.858 | 41.224 | 37.813 | 1.00 52.07 | C |
| ATOM | 5838 | CE1 | HIS | 732 | -63.623 | 43.158 | 38.318 | 1.00 52.07 | C |
| ATOM | 5839 | C   | HIS | 732 | -66.453 | 38.066 | 38.419 | 1.00 52.07 | C |
| ATOM | 5840 | O   | HIS | 732 | -66.158 | 37.069 | 37.761 | 1.00 52.07 | O |
| ATOM | 5841 | N   | GLN | 733 | -67.707 | 38.319 | 38.843 | 1.00 74.25 | N |
| ATOM | 5842 | CA  | GLN | 733 | -68.825 | 37.441 | 38.645 | 1.00 74.25 | C |
| ATOM | 5843 | CB  | GLN | 733 | -70.082 | 37.896 | 39.406 | 1.00 74.25 | C |
| ATOM | 5844 | CG  | GLN | 733 | -71.232 | 36.888 | 39.340 | 1.00 74.25 | C |
| ATOM | 5845 | CD  | GLN | 733 | -72.355 | 37.395 | 40.232 | 1.00 74.25 | C |
| ATOM | 5846 | OE1 | GLN | 733 | -72.553 | 36.900 | 41.342 | 1.00 74.25 | O |
| ATOM | 5847 | NE2 | GLN | 733 | -73.109 | 38.414 | 39.742 | 1.00 74.25 | N |
| ATOM | 5848 | C   | GLN | 733 | -69.172 | 37.332 | 37.191 | 1.00 74.25 | C |
| ATOM | 5849 | O   | GLN | 733 | -69.587 | 36.270 | 36.734 | 1.00 74.25 | O |
| ATOM | 5850 | N   | ASP | 734 | -69.033 | 38.430 | 36.422 | 1.00 64.83 | N |
| ATOM | 5851 | CA  | ASP | 734 | -69.415 | 38.395 | 35.038 | 1.00 64.83 | C |
| ATOM | 5852 | CB  | ASP | 734 | -69.341 | 39.755 | 34.321 | 1.00 64.83 | C |
| ATOM | 5853 | CG  | ASP | 734 | -70.591 | 40.540 | 34.699 | 1.00 64.83 | C |
| ATOM | 5854 | OD1 | ASP | 734 | -71.344 | 40.073 | 35.594 | 1.00 64.83 | O |
| ATOM | 5855 | OD2 | ASP | 734 | -70.820 | 41.613 | 34.080 | 1.00 64.83 | O |
| ATOM | 5856 | C   | ASP | 734 | -68.582 | 37.409 | 34.282 | 1.00 64.83 | C |
| ATOM | 5857 | O   | ASP | 734 | -69.091 | 36.742 | 33.384 | 1.00 64.83 | O |
| ATOM | 5858 | N   | GLU | 735 | -67.278 | 37.298 | 34.606 | 1.00 56.53 | N |
| ATOM | 5859 | CA  | GLU | 735 | -66.425 | 36.370 | 33.921 | 1.00 56.53 | C |
| ATOM | 5860 | CB  | GLU | 735 | -64.951 | 36.457 | 34.347 | 1.00 56.53 | C |
| ATOM | 5861 | CG  | GLU | 735 | -64.239 | 37.714 | 33.853 | 1.00 56.53 | C |
| ATOM | 5862 | CD  | GLU | 735 | -62.784 | 37.609 | 34.280 | 1.00 56.53 | C |
| ATOM | 5863 | OE1 | GLU | 735 | -62.488 | 36.765 | 35.168 | 1.00 56.53 | O |
| ATOM | 5864 | OE2 | GLU | 735 | -61.948 | 38.367 | 33.721 | 1.00 56.53 | O |
| ATOM | 5865 | C   | GLU | 735 | -66.873 | 34.970 | 34.213 | 1.00 56.53 | C |
| ATOM | 5866 | O   | GLU | 735 | -66.871 | 34.118 | 33.328 | 1.00 56.53 | O |
| ATOM | 5867 | N   | LEU | 736 | -67.263 | 34.692 | 35.472 | 1.00 79.52 | N |
| ATOM | 5868 | CA  | LEU | 736 | -67.648 | 33.364 | 35.860 | 1.00 79.52 | C |
| ATOM | 5869 | CB  | LEU | 736 | -67.995 | 33.258 | 37.355 | 1.00 79.52 | C |
| ATOM | 5870 | CG  | LEU | 736 | -66.786 | 33.453 | 38.288 | 1.00 79.52 | C |
| ATOM | 5871 | CD1 | LEU | 736 | -67.197 | 33.337 | 39.764 | 1.00 79.52 | C |
| ATOM | 5872 | CD2 | LEU | 736 | -65.647 | 32.491 | 37.925 | 1.00 79.52 | C |
| ATOM | 5873 | C   | LEU | 736 | -68.867 | 32.933 | 35.094 | 1.00 79.52 | C |
| ATOM | 5874 | O   | LEU | 736 | -68.908 | 31.819 | 34.573 | 1.00 79.52 | O |
| ATOM | 5875 | N   | ILE | 737 | -69.906 | 33.794 | 35.020 | 1.00120.39 | N |
| ATOM | 5876 | CA  | ILE | 737 | -71.090 | 33.444 | 34.280 | 1.00120.39 | C |
| ATOM | 5877 | CB  | ILE | 737 | -72.266 | 34.376 | 34.414 | 1.00120.39 | C |
| ATOM | 5878 | CG1 | ILE | 737 | -72.899 | 34.305 | 35.814 | 1.00120.39 | C |

|      |      |     |     |     |         |        |        |            |   |
|------|------|-----|-----|-----|---------|--------|--------|------------|---|
| ATOM | 5879 | CG2 | ILE | 737 | -73.255 | 34.021 | 33.290 | 1.00120.39 | C |
| ATOM | 5880 | CD1 | ILE | 737 | -72.157 | 35.087 | 36.891 | 1.00120.39 | C |
| ATOM | 5881 | C   | ILE | 737 | -70.772 | 33.386 | 32.819 | 1.00120.39 | C |
| ATOM | 5882 | O   | ILE | 737 | -71.280 | 32.526 | 32.103 | 1.00120.39 | O |
| ATOM | 5883 | N   | GLY | 738 | -69.931 | 34.320 | 32.337 | 1.00 41.79 | N |
| ATOM | 5884 | CA  | GLY | 738 | -69.627 | 34.398 | 30.935 | 1.00 41.79 | C |
| ATOM | 5885 | C   | GLY | 738 | -69.015 | 33.110 | 30.478 | 1.00 41.79 | C |
| ATOM | 5886 | O   | GLY | 738 | -69.304 | 32.639 | 29.380 | 1.00 41.79 | O |
| ATOM | 5887 | N   | ARG | 739 | -68.117 | 32.532 | 31.292 | 1.00150.43 | N |
| ATOM | 5888 | CA  | ARG | 739 | -67.447 | 31.300 | 30.972 | 1.00150.43 | C |
| ATOM | 5889 | CB  | ARG | 739 | -66.383 | 30.962 | 32.023 | 1.00150.43 | C |
| ATOM | 5890 | CG  | ARG | 739 | -65.553 | 29.717 | 31.733 | 1.00150.43 | C |
| ATOM | 5891 | CD  | ARG | 739 | -64.606 | 29.403 | 32.888 | 1.00150.43 | C |
| ATOM | 5892 | NE  | ARG | 739 | -63.877 | 30.666 | 33.184 | 1.00150.43 | N |
| ATOM | 5893 | CZ  | ARG | 739 | -62.625 | 30.889 | 32.689 | 1.00150.43 | C |
| ATOM | 5894 | NH1 | ARG | 739 | -61.952 | 29.900 | 32.035 | 1.00150.43 | N |
| ATOM | 5895 | NH2 | ARG | 739 | -62.043 | 32.111 | 32.856 | 1.00150.43 | N |
| ATOM | 5896 | C   | ARG | 739 | -68.425 | 30.157 | 30.953 | 1.00150.43 | C |
| ATOM | 5897 | O   | ARG | 739 | -68.384 | 29.298 | 30.075 | 1.00150.43 | O |
| ATOM | 5898 | N   | ALA | 740 | -69.340 | 30.121 | 31.940 | 1.00 71.14 | N |
| ATOM | 5899 | CA  | ALA | 740 | -70.296 | 29.056 | 32.096 | 1.00 71.14 | C |
| ATOM | 5900 | CB  | ALA | 740 | -71.159 | 29.208 | 33.361 | 1.00 71.14 | C |
| ATOM | 5901 | C   | ALA | 740 | -71.217 | 29.021 | 30.917 | 1.00 71.14 | C |
| ATOM | 5902 | O   | ALA | 740 | -71.715 | 27.970 | 30.523 | 1.00 71.14 | O |
| ATOM | 5903 | N   | ARG | 741 | -71.496 | 30.202 | 30.356 | 1.00194.85 | N |
| ATOM | 5904 | CA  | ARG | 741 | -72.389 | 30.418 | 29.259 | 1.00194.85 | C |
| ATOM | 5905 | CB  | ARG | 741 | -72.623 | 31.925 | 29.076 | 1.00194.85 | C |
| ATOM | 5906 | CG  | ARG | 741 | -73.788 | 32.302 | 28.173 | 1.00194.85 | C |
| ATOM | 5907 | CD  | ARG | 741 | -74.096 | 33.799 | 28.218 | 1.00194.85 | C |
| ATOM | 5908 | NE  | ARG | 741 | -74.961 | 34.052 | 29.402 | 1.00194.85 | N |
| ATOM | 5909 | CZ  | ARG | 741 | -76.284 | 34.329 | 29.208 | 1.00194.85 | C |
| ATOM | 5910 | NH1 | ARG | 741 | -76.771 | 34.445 | 27.939 | 1.00194.85 | N |
| ATOM | 5911 | NH2 | ARG | 741 | -77.116 | 34.502 | 30.274 | 1.00194.85 | N |
| ATOM | 5912 | C   | ARG | 741 | -71.852 | 29.814 | 27.986 | 1.00194.85 | C |
| ATOM | 5913 | O   | ARG | 741 | -72.611 | 29.591 | 27.046 | 1.00194.85 | O |
| ATOM | 5914 | N   | VAL | 742 | -70.526 | 29.602 | 27.863 | 1.00155.68 | N |
| ATOM | 5915 | CA  | VAL | 742 | -70.017 | 29.099 | 26.609 | 1.00155.68 | C |
| ATOM | 5916 | CB  | VAL | 742 | -68.710 | 29.720 | 26.210 | 1.00155.68 | C |
| ATOM | 5917 | CG1 | VAL | 742 | -68.258 | 29.097 | 24.879 | 1.00155.68 | C |
| ATOM | 5918 | CG2 | VAL | 742 | -68.894 | 31.247 | 26.154 | 1.00155.68 | C |
| ATOM | 5919 | C   | VAL | 742 | -69.819 | 27.606 | 26.639 | 1.00155.68 | C |
| ATOM | 5920 | O   | VAL | 742 | -69.428 | 27.034 | 27.655 | 1.00155.68 | O |
| ATOM | 5921 | N   | SER | 743 | -70.081 | 26.941 | 25.485 | 1.00433.32 | N |
| ATOM | 5922 | CA  | SER | 743 | -69.911 | 25.518 | 25.330 | 1.00433.32 | C |
| ATOM | 5923 | CB  | SER | 743 | -71.125 | 24.849 | 24.664 | 1.00433.32 | C |
| ATOM | 5924 | OG  | SER | 743 | -70.987 | 23.438 | 24.683 | 1.00433.32 | O |
| ATOM | 5925 | C   | SER | 743 | -68.700 | 25.324 | 24.450 | 1.00433.32 | C |
| ATOM | 5926 | O   | SER | 743 | -68.479 | 26.087 | 23.514 | 1.00433.32 | O |
| ATOM | 5927 | N   | PRO | 744 | -67.929 | 24.297 | 24.726 | 1.00999.99 | N |
| ATOM | 5928 | CA  | PRO | 744 | -66.636 | 24.068 | 24.109 | 1.00999.99 | C |
| ATOM | 5929 | CD  | PRO | 744 | -68.051 | 23.618 | 26.007 | 1.00999.99 | C |
| ATOM | 5930 | CB  | PRO | 744 | -66.005 | 22.922 | 24.899 | 1.00999.99 | C |
| ATOM | 5931 | CG  | PRO | 744 | -66.666 | 23.014 | 26.286 | 1.00999.99 | C |
| ATOM | 5932 | C   | PRO | 744 | -66.586 | 23.844 | 22.630 | 1.00999.99 | C |
| ATOM | 5933 | O   | PRO | 744 | -65.523 | 24.048 | 22.038 | 1.00999.99 | O |
| ATOM | 5934 | N   | GLY | 745 | -67.686 | 23.386 | 22.010 | 1.00395.98 | N |
| ATOM | 5935 | CA  | GLY | 745 | -67.651 | 23.166 | 20.597 | 1.00395.98 | C |
| ATOM | 5936 | C   | GLY | 745 | -69.058 | 22.953 | 20.164 | 1.00395.98 | C |
| ATOM | 5937 | O   | GLY | 745 | -69.985 | 22.994 | 20.971 | 1.00395.98 | O |
| ATOM | 5938 | N   | ALA | 746 | -69.241 | 22.738 | 18.852 | 1.00152.12 | N |
| ATOM | 5939 | CA  | ALA | 746 | -70.545 | 22.555 | 18.303 | 1.00152.12 | C |
| ATOM | 5940 | CB  | ALA | 746 | -70.675 | 23.055 | 16.854 | 1.00152.12 | C |
| ATOM | 5941 | C   | ALA | 746 | -70.920 | 21.110 | 18.302 | 1.00152.12 | C |
| ATOM | 5942 | O   | ALA | 746 | -70.085 | 20.222 | 18.465 | 1.00152.12 | O |
| ATOM | 5943 | N   | GLY | 747 | -72.230 | 20.850 | 18.135 | 1.00135.83 | N |
| ATOM | 5944 | CA  | GLY | 747 | -72.708 | 19.509 | 17.985 | 1.00135.83 | C |

|      |      |     |     |     |         |        |        |            |   |
|------|------|-----|-----|-----|---------|--------|--------|------------|---|
| ATOM | 5945 | C   | GLY | 747 | -72.865 | 18.841 | 19.311 | 1.00135.83 | C |
| ATOM | 5946 | O   | GLY | 747 | -73.012 | 17.621 | 19.363 | 1.00135.83 | O |
| ATOM | 5947 | N   | TRP | 748 | -72.836 | 19.598 | 20.422 | 1.00176.04 | N |
| ATOM | 5948 | CA  | TRP | 748 | -72.982 | 18.924 | 21.680 | 1.00176.04 | C |
| ATOM | 5949 | CB  | TRP | 748 | -72.339 | 19.659 | 22.867 | 1.00176.04 | C |
| ATOM | 5950 | CG  | TRP | 748 | -70.833 | 19.685 | 22.768 | 1.00176.04 | C |
| ATOM | 5951 | CD2 | TRP | 748 | -69.943 | 19.656 | 23.893 | 1.00176.04 | C |
| ATOM | 5952 | CD1 | TRP | 748 | -70.046 | 19.696 | 21.654 | 1.00176.04 | C |
| ATOM | 5953 | NE1 | TRP | 748 | -68.720 | 19.683 | 22.015 | 1.00176.04 | N |
| ATOM | 5954 | CE2 | TRP | 748 | -68.642 | 19.653 | 23.390 | 1.00176.04 | C |
| ATOM | 5955 | CE3 | TRP | 748 | -70.191 | 19.623 | 25.234 | 1.00176.04 | C |
| ATOM | 5956 | CZ2 | TRP | 748 | -67.563 | 19.618 | 24.225 | 1.00176.04 | C |
| ATOM | 5957 | CZ3 | TRP | 748 | -69.099 | 19.595 | 26.073 | 1.00176.04 | C |
| ATOM | 5958 | CH2 | TRP | 748 | -67.811 | 19.592 | 25.579 | 1.00176.04 | C |
| ATOM | 5959 | C   | TRP | 748 | -74.442 | 18.710 | 21.958 | 1.00176.04 | C |
| ATOM | 5960 | O   | TRP | 748 | -75.270 | 19.607 | 21.797 | 1.00176.04 | O |
| ATOM | 5961 | N   | SER | 749 | -74.776 | 17.484 | 22.408 | 1.00233.74 | N |
| ATOM | 5962 | CA  | SER | 749 | -76.122 | 17.075 | 22.690 | 1.00233.74 | C |
| ATOM | 5963 | CB  | SER | 749 | -76.245 | 15.557 | 22.903 | 1.00233.74 | C |
| ATOM | 5964 | OG  | SER | 749 | -77.579 | 15.212 | 23.241 | 1.00233.74 | O |
| ATOM | 5965 | C   | SER | 749 | -76.560 | 17.744 | 23.950 | 1.00233.74 | C |
| ATOM | 5966 | O   | SER | 749 | -75.753 | 18.294 | 24.696 | 1.00233.74 | O |
| ATOM | 5967 | N   | ILE | 750 | -77.877 | 17.691 | 24.219 | 1.00184.45 | N |
| ATOM | 5968 | CA  | ILE | 750 | -78.455 | 18.338 | 25.357 | 1.00184.45 | C |
| ATOM | 5969 | CB  | ILE | 750 | -79.953 | 18.159 | 25.399 | 1.00184.45 | C |
| ATOM | 5970 | CG1 | ILE | 750 | -80.623 | 19.080 | 26.438 | 1.00184.45 | C |
| ATOM | 5971 | CG2 | ILE | 750 | -80.251 | 16.663 | 25.592 | 1.00184.45 | C |
| ATOM | 5972 | CD1 | ILE | 750 | -80.280 | 18.766 | 27.894 | 1.00184.45 | C |
| ATOM | 5973 | C   | ILE | 750 | -77.839 | 17.761 | 26.596 | 1.00184.45 | C |
| ATOM | 5974 | O   | ILE | 750 | -77.528 | 18.488 | 27.538 | 1.00184.45 | O |
| ATOM | 5975 | N   | ARG | 751 | -77.633 | 16.432 | 26.624 | 1.00193.04 | N |
| ATOM | 5976 | CA  | ARG | 751 | -77.115 | 15.790 | 27.797 | 1.00193.04 | C |
| ATOM | 5977 | CB  | ARG | 751 | -76.995 | 14.265 | 27.627 | 1.00193.04 | C |
| ATOM | 5978 | CG  | ARG | 751 | -76.584 | 13.520 | 28.900 | 1.00193.04 | C |
| ATOM | 5979 | CD  | ARG | 751 | -76.585 | 11.997 | 28.734 | 1.00193.04 | C |
| ATOM | 5980 | NE  | ARG | 751 | -76.397 | 11.382 | 30.079 | 1.00193.04 | N |
| ATOM | 5981 | CZ  | ARG | 751 | -75.161 | 10.980 | 30.495 | 1.00193.04 | C |
| ATOM | 5982 | NH1 | ARG | 751 | -74.083 | 11.135 | 29.673 | 1.00193.04 | N |
| ATOM | 5983 | NH2 | ARG | 751 | -75.005 | 10.413 | 31.726 | 1.00193.04 | N |
| ATOM | 5984 | C   | ARG | 751 | -75.751 | 16.322 | 28.120 | 1.00193.04 | C |
| ATOM | 5985 | O   | ARG | 751 | -75.467 | 16.644 | 29.271 | 1.00193.04 | O |
| ATOM | 5986 | N   | GLU | 752 | -74.873 | 16.451 | 27.108 | 1.00369.63 | N |
| ATOM | 5987 | CA  | GLU | 752 | -73.515 | 16.883 | 27.312 | 1.00369.63 | C |
| ATOM | 5988 | CB  | GLU | 752 | -72.689 | 16.851 | 26.006 | 1.00369.63 | C |
| ATOM | 5989 | CG  | GLU | 752 | -72.391 | 15.437 | 25.483 | 1.00369.63 | C |
| ATOM | 5990 | CD  | GLU | 752 | -71.602 | 15.555 | 24.186 | 1.00369.63 | C |
| ATOM | 5991 | OE1 | GLU | 752 | -72.141 | 16.149 | 23.214 | 1.00369.63 | O |
| ATOM | 5992 | OE2 | GLU | 752 | -70.447 | 15.052 | 24.151 | 1.00369.63 | O |
| ATOM | 5993 | C   | GLU | 752 | -73.503 | 18.289 | 27.834 | 1.00369.63 | C |
| ATOM | 5994 | O   | GLU | 752 | -72.726 | 18.625 | 28.727 | 1.00369.63 | O |
| ATOM | 5995 | N   | THR | 753 | -74.377 | 19.144 | 27.278 | 1.00253.45 | N |
| ATOM | 5996 | CA  | THR | 753 | -74.463 | 20.534 | 27.628 | 1.00253.45 | C |
| ATOM | 5997 | CB  | THR | 753 | -75.510 | 21.233 | 26.814 | 1.00253.45 | C |
| ATOM | 5998 | OG1 | THR | 753 | -75.236 | 21.099 | 25.430 | 1.00253.45 | O |
| ATOM | 5999 | CG2 | THR | 753 | -75.527 | 22.715 | 27.197 | 1.00253.45 | C |
| ATOM | 6000 | C   | THR | 753 | -74.898 | 20.659 | 29.059 | 1.00253.45 | C |
| ATOM | 6001 | O   | THR | 753 | -74.371 | 21.478 | 29.812 | 1.00253.45 | O |
| ATOM | 6002 | N   | ALA | 754 | -75.899 | 19.853 | 29.462 | 1.00 96.90 | N |
| ATOM | 6003 | CA  | ALA | 754 | -76.434 | 19.888 | 30.797 | 1.00 96.90 | C |
| ATOM | 6004 | CB  | ALA | 754 | -77.640 | 18.948 | 30.985 | 1.00 96.90 | C |
| ATOM | 6005 | C   | ALA | 754 | -75.370 | 19.475 | 31.765 | 1.00 96.90 | C |
| ATOM | 6006 | O   | ALA | 754 | -75.283 | 19.984 | 32.881 | 1.00 96.90 | O |
| ATOM | 6007 | N   | CYS | 755 | -74.549 | 18.497 | 31.352 | 1.00168.37 | N |
| ATOM | 6008 | CA  | CYS | 755 | -73.467 | 17.946 | 32.110 | 1.00168.37 | C |
| ATOM | 6009 | CB  | CYS | 755 | -72.794 | 16.862 | 31.251 | 1.00168.37 | C |
| ATOM | 6010 | SG  | CYS | 755 | -73.781 | 15.336 | 31.168 | 1.00168.37 | S |

|      |      |     |     |     |         |        |        |            |   |
|------|------|-----|-----|-----|---------|--------|--------|------------|---|
| ATOM | 6011 | C   | CYS | 755 | -72.455 | 19.025 | 32.394 | 1.00168.37 | C |
| ATOM | 6012 | O   | CYS | 755 | -71.971 | 19.176 | 33.517 | 1.00168.37 | O |
| ATOM | 6013 | N   | LEU | 756 | -72.096 | 19.819 | 31.373 | 1.00426.27 | N |
| ATOM | 6014 | CA  | LEU | 756 | -71.138 | 20.875 | 31.576 | 1.00426.27 | C |
| ATOM | 6015 | CB  | LEU | 756 | -70.772 | 21.697 | 30.328 | 1.00426.27 | C |
| ATOM | 6016 | CG  | LEU | 756 | -69.634 | 21.118 | 29.488 | 1.00426.27 | C |
| ATOM | 6017 | CD1 | LEU | 756 | -68.312 | 21.152 | 30.273 | 1.00426.27 | C |
| ATOM | 6018 | CD2 | LEU | 756 | -69.986 | 19.731 | 28.951 | 1.00426.27 | C |
| ATOM | 6019 | C   | LEU | 756 | -71.695 | 21.883 | 32.511 | 1.00426.27 | C |
| ATOM | 6020 | O   | LEU | 756 | -70.986 | 22.411 | 33.365 | 1.00426.27 | O |
| ATOM | 6021 | N   | ALA | 757 | -72.986 | 22.196 | 32.353 | 1.00119.91 | N |
| ATOM | 6022 | CA  | ALA | 757 | -73.584 | 23.196 | 33.179 | 1.00119.91 | C |
| ATOM | 6023 | CB  | ALA | 757 | -75.068 | 23.412 | 32.884 | 1.00119.91 | C |
| ATOM | 6024 | C   | ALA | 757 | -73.507 | 22.755 | 34.600 | 1.00119.91 | C |
| ATOM | 6025 | O   | ALA | 757 | -73.271 | 23.566 | 35.493 | 1.00119.91 | O |
| ATOM | 6026 | N   | LYS | 758 | -73.727 | 21.454 | 34.854 | 1.00147.92 | N |
| ATOM | 6027 | CA  | LYS | 758 | -73.729 | 20.985 | 36.209 | 1.00147.92 | C |
| ATOM | 6028 | CB  | LYS | 758 | -74.316 | 19.579 | 36.434 | 1.00147.92 | C |
| ATOM | 6029 | CG  | LYS | 758 | -73.538 | 18.413 | 35.846 | 1.00147.92 | C |
| ATOM | 6030 | CD  | LYS | 758 | -73.910 | 17.097 | 36.525 | 1.00147.92 | C |
| ATOM | 6031 | CE  | LYS | 758 | -73.199 | 16.924 | 37.869 | 1.00147.92 | C |
| ATOM | 6032 | NZ  | LYS | 758 | -73.489 | 15.598 | 38.449 | 1.00147.92 | N |
| ATOM | 6033 | C   | LYS | 758 | -72.360 | 21.084 | 36.811 | 1.00147.92 | C |
| ATOM | 6034 | O   | LYS | 758 | -72.230 | 21.274 | 38.018 | 1.00147.92 | O |
| ATOM | 6035 | N   | SER | 759 | -71.299 | 20.922 | 35.997 | 1.00226.38 | N |
| ATOM | 6036 | CA  | SER | 759 | -69.948 | 21.006 | 36.480 | 1.00226.38 | C |
| ATOM | 6037 | CB  | SER | 759 | -68.920 | 20.751 | 35.367 | 1.00226.38 | C |
| ATOM | 6038 | OG  | SER | 759 | -69.179 | 19.505 | 34.742 | 1.00226.38 | O |
| ATOM | 6039 | C   | SER | 759 | -69.696 | 22.400 | 36.971 | 1.00226.38 | C |
| ATOM | 6040 | O   | SER | 759 | -69.138 | 22.598 | 38.050 | 1.00226.38 | O |
| ATOM | 6041 | N   | TYR | 760 | -70.106 | 23.409 | 36.174 | 1.00142.61 | N |
| ATOM | 6042 | CA  | TYR | 760 | -69.896 | 24.784 | 36.526 | 1.00142.61 | C |
| ATOM | 6043 | CB  | TYR | 760 | -70.310 | 25.777 | 35.424 | 1.00142.61 | C |
| ATOM | 6044 | CG  | TYR | 760 | -69.288 | 25.695 | 34.339 | 1.00142.61 | C |
| ATOM | 6045 | CD1 | TYR | 760 | -69.408 | 24.803 | 33.299 | 1.00142.61 | C |
| ATOM | 6046 | CD2 | TYR | 760 | -68.189 | 26.519 | 34.375 | 1.00142.61 | C |
| ATOM | 6047 | CE1 | TYR | 760 | -68.448 | 24.746 | 32.313 | 1.00142.61 | C |
| ATOM | 6048 | CE2 | TYR | 760 | -67.230 | 26.467 | 33.395 | 1.00142.61 | C |
| ATOM | 6049 | CZ  | TYR | 760 | -67.356 | 25.579 | 32.360 | 1.00142.61 | C |
| ATOM | 6050 | OH  | TYR | 760 | -66.365 | 25.531 | 31.359 | 1.00142.61 | O |
| ATOM | 6051 | C   | TYR | 760 | -70.665 | 25.099 | 37.770 | 1.00142.61 | C |
| ATOM | 6052 | O   | TYR | 760 | -70.159 | 25.767 | 38.669 | 1.00142.61 | O |
| ATOM | 6053 | N   | ALA | 761 | -71.915 | 24.612 | 37.861 | 1.00 47.64 | N |
| ATOM | 6054 | CA  | ALA | 761 | -72.734 | 24.887 | 39.003 | 1.00 47.64 | C |
| ATOM | 6055 | CB  | ALA | 761 | -74.126 | 24.240 | 38.901 | 1.00 47.64 | C |
| ATOM | 6056 | C   | ALA | 761 | -72.073 | 24.345 | 40.240 | 1.00 47.64 | C |
| ATOM | 6057 | O   | ALA | 761 | -71.998 | 25.025 | 41.262 | 1.00 47.64 | O |
| ATOM | 6058 | N   | GLN | 762 | -71.550 | 23.110 | 40.169 | 1.00 89.19 | N |
| ATOM | 6059 | CA  | GLN | 762 | -70.932 | 22.426 | 41.273 | 1.00 89.19 | C |
| ATOM | 6060 | CB  | GLN | 762 | -70.566 | 20.973 | 40.912 | 1.00 89.19 | C |
| ATOM | 6061 | CG  | GLN | 762 | -71.782 | 20.105 | 40.572 | 1.00 89.19 | C |
| ATOM | 6062 | CD  | GLN | 762 | -71.294 | 18.760 | 40.046 | 1.00 89.19 | C |
| ATOM | 6063 | OE1 | GLN | 762 | -70.378 | 18.690 | 39.227 | 1.00 89.19 | O |
| ATOM | 6064 | NE2 | GLN | 762 | -71.923 | 17.654 | 40.526 | 1.00 89.19 | N |
| ATOM | 6065 | C   | GLN | 762 | -69.669 | 23.131 | 41.679 | 1.00 89.19 | C |
| ATOM | 6066 | O   | GLN | 762 | -69.339 | 23.185 | 42.862 | 1.00 89.19 | O |
| ATOM | 6067 | N   | MET | 763 | -68.904 | 23.661 | 40.705 | 1.00 60.11 | N |
| ATOM | 6068 | CA  | MET | 763 | -67.670 | 24.344 | 40.993 | 1.00 60.11 | C |
| ATOM | 6069 | CB  | MET | 763 | -66.935 | 24.812 | 39.730 | 1.00 60.11 | C |
| ATOM | 6070 | CG  | MET | 763 | -65.625 | 25.539 | 40.035 | 1.00 60.11 | C |
| ATOM | 6071 | SD  | MET | 763 | -64.749 | 26.152 | 38.567 | 1.00 60.11 | S |
| ATOM | 6072 | CE  | MET | 763 | -66.072 | 27.294 | 38.068 | 1.00 60.11 | C |
| ATOM | 6073 | C   | MET | 763 | -67.984 | 25.570 | 41.788 | 1.00 60.11 | C |
| ATOM | 6074 | O   | MET | 763 | -67.258 | 25.934 | 42.714 | 1.00 60.11 | O |
| ATOM | 6075 | N   | TRP | 764 | -69.089 | 26.245 | 41.422 | 1.00 72.57 | N |
| ATOM | 6076 | CA  | TRP | 764 | -69.509 | 27.455 | 42.063 | 1.00 72.57 | C |

|      |      |     |     |     |         |        |        |            |       |   |
|------|------|-----|-----|-----|---------|--------|--------|------------|-------|---|
| ATOM | 6077 | CB  | TRP | 764 | -70.734 | 28.079 | 41.359 | 1.00       | 72.57 | C |
| ATOM | 6078 | CG  | TRP | 764 | -70.401 | 28.651 | 39.996 | 1.00       | 72.57 | C |
| ATOM | 6079 | CD2 | TRP | 764 | -71.359 | 29.076 | 39.009 | 1.00       | 72.57 | C |
| ATOM | 6080 | CD1 | TRP | 764 | -69.169 | 28.873 | 39.452 | 1.00       | 72.57 | C |
| ATOM | 6081 | NE1 | TRP | 764 | -69.297 | 29.418 | 38.197 | 1.00       | 72.57 | N |
| ATOM | 6082 | CE2 | TRP | 764 | -70.639 | 29.546 | 37.911 | 1.00       | 72.57 | C |
| ATOM | 6083 | CE3 | TRP | 764 | -72.725 | 29.074 | 39.016 | 1.00       | 72.57 | C |
| ATOM | 6084 | CZ2 | TRP | 764 | -71.275 | 30.025 | 36.800 | 1.00       | 72.57 | C |
| ATOM | 6085 | CZ3 | TRP | 764 | -73.363 | 29.557 | 37.893 | 1.00       | 72.57 | C |
| ATOM | 6086 | CH2 | TRP | 764 | -72.652 | 30.024 | 36.806 | 1.00       | 72.57 | C |
| ATOM | 6087 | C   | TRP | 764 | -69.844 | 27.159 | 43.491 | 1.00       | 72.57 | C |
| ATOM | 6088 | O   | TRP | 764 | -69.469 | 27.909 | 44.391 | 1.00       | 72.57 | O |
| ATOM | 6089 | N   | GLN | 765 | -70.546 | 26.038 | 43.743 | 1.00144.07 |       | N |
| ATOM | 6090 | CA  | GLN | 765 | -70.945 | 25.722 | 45.084 | 1.00144.07 |       | C |
| ATOM | 6091 | CB  | GLN | 765 | -71.883 | 24.497 | 45.189 | 1.00144.07 |       | C |
| ATOM | 6092 | CG  | GLN | 765 | -71.274 | 23.149 | 44.797 | 1.00144.07 |       | C |
| ATOM | 6093 | CD  | GLN | 765 | -70.437 | 22.626 | 45.958 | 1.00144.07 |       | C |
| ATOM | 6094 | OE1 | GLN | 765 | -70.839 | 22.710 | 47.117 | 1.00144.07 |       | O |
| ATOM | 6095 | NE2 | GLN | 765 | -69.232 | 22.082 | 45.641 | 1.00144.07 |       | N |
| ATOM | 6096 | C   | GLN | 765 | -69.731 | 25.483 | 45.933 | 1.00144.07 |       | C |
| ATOM | 6097 | O   | GLN | 765 | -69.733 | 25.760 | 47.131 | 1.00144.07 |       | O |
| ATOM | 6098 | N   | LEU | 766 | -68.689 | 24.861 | 45.361 | 1.00140.76 |       | N |
| ATOM | 6099 | CA  | LEU | 766 | -67.496 | 24.573 | 46.103 | 1.00140.76 |       | C |
| ATOM | 6100 | CB  | LEU | 766 | -66.633 | 23.575 | 45.325 | 1.00140.76 |       | C |
| ATOM | 6101 | CG  | LEU | 766 | -65.330 | 23.173 | 46.017 | 1.00140.76 |       | C |
| ATOM | 6102 | CD1 | LEU | 766 | -65.581 | 22.296 | 47.250 | 1.00140.76 |       | C |
| ATOM | 6103 | CD2 | LEU | 766 | -64.387 | 22.523 | 45.011 | 1.00140.76 |       | C |
| ATOM | 6104 | C   | LEU | 766 | -66.652 | 25.795 | 46.388 | 1.00140.76 |       | C |
| ATOM | 6105 | O   | LEU | 766 | -66.230 | 26.019 | 47.522 | 1.00140.76 |       | O |
| ATOM | 6106 | N   | LEU | 767 | -66.268 | 26.547 | 45.332 | 1.00192.33 |       | N |
| ATOM | 6107 | CA  | LEU | 767 | -65.422 | 27.701 | 45.508 | 1.00192.33 |       | C |
| ATOM | 6108 | CB  | LEU | 767 | -64.431 | 27.883 | 44.350 | 1.00192.33 |       | C |
| ATOM | 6109 | CG  | LEU | 767 | -63.485 | 26.672 | 44.228 | 1.00192.33 |       | C |
| ATOM | 6110 | CD1 | LEU | 767 | -64.197 | 25.450 | 43.635 | 1.00192.33 |       | C |
| ATOM | 6111 | CD2 | LEU | 767 | -62.191 | 27.027 | 43.497 | 1.00192.33 |       | C |
| ATOM | 6112 | C   | LEU | 767 | -66.107 | 29.017 | 45.783 | 1.00192.33 |       | C |
| ATOM | 6113 | O   | LEU | 767 | -65.630 | 29.821 | 46.579 | 1.00192.33 |       | O |
| ATOM | 6114 | N   | TYR | 768 | -67.166 | 29.286 | 44.997 | 1.00221.69 |       | N |
| ATOM | 6115 | CA  | TYR | 768 | -67.998 | 30.456 | 44.832 | 1.00221.69 |       | C |
| ATOM | 6116 | CB  | TYR | 768 | -68.385 | 30.670 | 43.366 | 1.00221.69 |       | C |
| ATOM | 6117 | CG  | TYR | 768 | -67.042 | 30.757 | 42.730 | 1.00221.69 |       | C |
| ATOM | 6118 | CD1 | TYR | 768 | -66.336 | 31.936 | 42.714 | 1.00221.69 |       | C |
| ATOM | 6119 | CD2 | TYR | 768 | -66.466 | 29.632 | 42.194 | 1.00221.69 |       | C |
| ATOM | 6120 | CE1 | TYR | 768 | -65.087 | 31.994 | 42.141 | 1.00221.69 |       | C |
| ATOM | 6121 | CE2 | TYR | 768 | -65.220 | 29.683 | 41.619 | 1.00221.69 |       | C |
| ATOM | 6122 | CH  | TYR | 768 | -64.532 | 30.866 | 41.591 | 1.00221.69 |       | C |
| ATOM | 6123 | OZ  | TYR | 768 | -63.255 | 30.908 | 41.002 | 1.00221.69 |       | O |
| ATOM | 6124 | C   | TYR | 768 | -69.206 | 30.599 | 45.720 | 1.00221.69 |       | C |
| ATOM | 6125 | O   | TYR | 768 | -70.013 | 31.499 | 45.488 | 1.00221.69 |       | O |
| ATOM | 6126 | N   | PHE | 769 | -69.469 | 29.652 | 46.632 | 1.00113.03 |       | N |
| ATOM | 6127 | CA  | PHE | 769 | -70.693 | 29.595 | 47.394 | 1.00113.03 |       | C |
| ATOM | 6128 | CB  | PHE | 769 | -70.690 | 28.461 | 48.438 | 1.00113.03 |       | C |
| ATOM | 6129 | CG  | PHE | 769 | -69.491 | 28.609 | 49.314 | 1.00113.03 |       | C |
| ATOM | 6130 | CD1 | PHE | 769 | -69.522 | 29.400 | 50.440 | 1.00113.03 |       | C |
| ATOM | 6131 | CD2 | PHE | 769 | -68.324 | 27.946 | 49.004 | 1.00113.03 |       | C |
| ATOM | 6132 | CE1 | PHE | 769 | -68.409 | 29.525 | 51.240 | 1.00113.03 |       | C |
| ATOM | 6133 | CE2 | PHE | 769 | -67.208 | 28.068 | 49.800 | 1.00113.03 |       | C |
| ATOM | 6134 | CZ  | PHE | 769 | -67.249 | 28.860 | 50.922 | 1.00113.03 |       | C |
| ATOM | 6135 | C   | PHE | 769 | -71.008 | 30.900 | 48.074 | 1.00113.03 |       | C |
| ATOM | 6136 | O   | PHE | 769 | -72.175 | 31.203 | 48.321 | 1.00113.03 |       | O |
| ATOM | 6137 | N   | HIS | 770 | -69.982 | 31.688 | 48.425 | 1.00154.45 |       | N |
| ATOM | 6138 | CA  | HIS | 770 | -70.086 | 32.951 | 49.100 | 1.00154.45 |       | C |
| ATOM | 6139 | ND1 | HIS | 770 | -67.267 | 34.199 | 47.523 | 1.00154.45 |       | N |
| ATOM | 6140 | CG  | HIS | 770 | -67.630 | 33.275 | 48.477 | 1.00154.45 |       | C |
| ATOM | 6141 | CB  | HIS | 770 | -68.699 | 33.485 | 49.514 | 1.00154.45 |       | C |
| ATOM | 6142 | NE2 | HIS | 770 | -65.971 | 32.427 | 47.203 | 1.00154.45 |       | N |

|      |      |     |     |     |         |        |        |            |   |
|------|------|-----|-----|-----|---------|--------|--------|------------|---|
| ATOM | 6143 | CD2 | HIS | 770 | -66.828 | 32.196 | 48.264 | 1.00154.45 | C |
| ATOM | 6144 | CE1 | HIS | 770 | -66.272 | 33.642 | 46.791 | 1.00154.45 | C |
| ATOM | 6145 | C   | HIS | 770 | -70.801 | 33.994 | 48.272 | 1.00154.45 | C |
| ATOM | 6146 | O   | HIS | 770 | -71.222 | 35.016 | 48.813 | 1.00154.45 | O |
| ATOM | 6147 | N   | ARG | 771 | -70.896 | 33.816 | 46.938 | 1.00217.42 | N |
| ATOM | 6148 | CA  | ARG | 771 | -71.536 | 34.782 | 46.078 | 1.00217.42 | C |
| ATOM | 6149 | CB  | ARG | 771 | -70.922 | 34.752 | 44.671 | 1.00217.42 | C |
| ATOM | 6150 | CG  | ARG | 771 | -69.397 | 34.784 | 44.770 | 1.00217.42 | C |
| ATOM | 6151 | CD  | ARG | 771 | -68.849 | 36.139 | 45.207 | 1.00217.42 | C |
| ATOM | 6152 | NE  | ARG | 771 | -68.450 | 36.875 | 43.978 | 1.00217.42 | N |
| ATOM | 6153 | CZ  | ARG | 771 | -69.377 | 37.479 | 43.182 | 1.00217.42 | C |
| ATOM | 6154 | NH1 | ARG | 771 | -70.705 | 37.339 | 43.450 | 1.00217.42 | N |
| ATOM | 6155 | NH2 | ARG | 771 | -68.966 | 38.203 | 42.100 | 1.00217.42 | N |
| ATOM | 6156 | C   | ARG | 771 | -72.998 | 34.441 | 45.971 | 1.00217.42 | C |
| ATOM | 6157 | O   | ARG | 771 | -73.362 | 33.333 | 45.581 | 1.00217.42 | O |
| ATOM | 6158 | N   | ARG | 772 | -73.877 | 35.419 | 46.280 | 1.00214.51 | N |
| ATOM | 6159 | CA  | ARG | 772 | -75.299 | 35.208 | 46.364 | 1.00214.51 | C |
| ATOM | 6160 | CB  | ARG | 772 | -76.068 | 36.494 | 46.713 | 1.00214.51 | C |
| ATOM | 6161 | CG  | ARG | 772 | -75.558 | 37.233 | 47.953 | 1.00214.51 | C |
| ATOM | 6162 | CD  | ARG | 772 | -76.304 | 36.935 | 49.248 | 1.00214.51 | C |
| ATOM | 6163 | NE  | ARG | 772 | -75.995 | 38.038 | 50.205 | 1.00214.51 | N |
| ATOM | 6164 | CZ  | ARG | 772 | -74.720 | 38.255 | 50.642 | 1.00214.51 | C |
| ATOM | 6165 | NH1 | ARG | 772 | -73.672 | 37.586 | 50.080 | 1.00214.51 | N |
| ATOM | 6166 | NH2 | ARG | 772 | -74.481 | 39.165 | 51.629 | 1.00214.51 | N |
| ATOM | 6167 | C   | ARG | 772 | -75.861 | 34.754 | 45.049 | 1.00214.51 | C |
| ATOM | 6168 | O   | ARG | 772 | -76.634 | 33.798 | 45.004 | 1.00214.51 | O |
| ATOM | 6169 | N   | ASP | 773 | -75.493 | 35.427 | 43.941 | 1.00138.61 | N |
| ATOM | 6170 | CA  | ASP | 773 | -76.053 | 35.118 | 42.654 | 1.00138.61 | C |
| ATOM | 6171 | CB  | ASP | 773 | -75.555 | 36.066 | 41.549 | 1.00138.61 | C |
| ATOM | 6172 | CG  | ASP | 773 | -76.061 | 37.468 | 41.850 | 1.00138.61 | C |
| ATOM | 6173 | OD1 | ASP | 773 | -76.758 | 37.636 | 42.885 | 1.00138.61 | O |
| ATOM | 6174 | OD2 | ASP | 773 | -75.757 | 38.392 | 41.049 | 1.00138.61 | O |
| ATOM | 6175 | C   | ASP | 773 | -75.653 | 33.739 | 42.227 | 1.00138.61 | C |
| ATOM | 6176 | O   | ASP | 773 | -76.466 | 32.988 | 41.692 | 1.00138.61 | O |
| ATOM | 6177 | N   | LEU | 774 | -74.374 | 33.378 | 42.438 | 1.00 62.53 | N |
| ATOM | 6178 | CA  | LEU | 774 | -73.851 | 32.118 | 41.983 | 1.00 62.53 | C |
| ATOM | 6179 | CB  | LEU | 774 | -72.324 | 32.031 | 42.116 | 1.00 62.53 | C |
| ATOM | 6180 | CG  | LEU | 774 | -71.608 | 33.071 | 41.233 | 1.00 62.53 | C |
| ATOM | 6181 | CD1 | LEU | 774 | -70.084 | 32.895 | 41.277 | 1.00 62.53 | C |
| ATOM | 6182 | CD2 | LEU | 774 | -72.169 | 33.069 | 39.801 | 1.00 62.53 | C |
| ATOM | 6183 | C   | LEU | 774 | -74.469 | 30.962 | 42.709 | 1.00 62.53 | C |
| ATOM | 6184 | O   | LEU | 774 | -74.731 | 29.918 | 42.114 | 1.00 62.53 | O |
| ATOM | 6185 | N   | ARG | 775 | -74.697 | 31.107 | 44.025 | 1.00177.15 | N |
| ATOM | 6186 | CA  | ARG | 775 | -75.255 | 30.048 | 44.817 | 1.00177.15 | C |
| ATOM | 6187 | CB  | ARG | 775 | -75.409 | 30.484 | 46.277 | 1.00177.15 | C |
| ATOM | 6188 | CG  | ARG | 775 | -75.792 | 29.385 | 47.262 | 1.00177.15 | C |
| ATOM | 6189 | CD  | ARG | 775 | -76.652 | 29.966 | 48.376 | 1.00177.15 | C |
| ATOM | 6190 | NE  | ARG | 775 | -76.475 | 29.167 | 49.613 | 1.00177.15 | N |
| ATOM | 6191 | CZ  | ARG | 775 | -75.427 | 29.478 | 50.427 | 1.00177.15 | C |
| ATOM | 6192 | NH1 | ARG | 775 | -74.424 | 30.279 | 49.968 | 1.00177.15 | N |
| ATOM | 6193 | NH2 | ARG | 775 | -75.410 | 29.026 | 51.711 | 1.00177.15 | N |
| ATOM | 6194 | C   | ARG | 775 | -76.638 | 29.759 | 44.317 | 1.00177.15 | C |
| ATOM | 6195 | O   | ARG | 775 | -77.036 | 28.602 | 44.180 | 1.00177.15 | O |
| ATOM | 6196 | N   | LEU | 776 | -77.415 | 30.826 | 44.050 | 1.00172.44 | N |
| ATOM | 6197 | CA  | LEU | 776 | -78.772 | 30.689 | 43.605 | 1.00172.44 | C |
| ATOM | 6198 | CB  | LEU | 776 | -79.496 | 32.053 | 43.559 | 1.00172.44 | C |
| ATOM | 6199 | CG  | LEU | 776 | -80.970 | 32.045 | 43.094 | 1.00172.44 | C |
| ATOM | 6200 | CD1 | LEU | 776 | -81.110 | 31.902 | 41.579 | 1.00172.44 | C |
| ATOM | 6201 | CD2 | LEU | 776 | -81.780 | 30.970 | 43.814 | 1.00172.44 | C |
| ATOM | 6202 | C   | LEU | 776 | -78.779 | 30.052 | 42.250 | 1.00172.44 | C |
| ATOM | 6203 | O   | LEU | 776 | -79.549 | 29.129 | 41.992 | 1.00172.44 | O |
| ATOM | 6204 | N   | MET | 777 | -77.890 | 30.514 | 41.352 | 1.00 58.56 | N |
| ATOM | 6205 | CA  | MET | 777 | -77.842 | 30.009 | 40.010 | 1.00 58.56 | C |
| ATOM | 6206 | CB  | MET | 777 | -76.867 | 30.799 | 39.118 | 1.00 58.56 | C |
| ATOM | 6207 | CG  | MET | 777 | -77.028 | 30.512 | 37.624 | 1.00 58.56 | C |
| ATOM | 6208 | SD  | MET | 777 | -75.913 | 31.464 | 36.551 | 1.00 58.56 | S |

|      |      |     |     |     |         |        |        |      |        |   |
|------|------|-----|-----|-----|---------|--------|--------|------|--------|---|
| ATOM | 6209 | CE  | MET | 777 | -76.791 | 33.042 | 36.748 | 1.00 | 58.56  | C |
| ATOM | 6210 | C   | MET | 777 | -77.415 | 28.570 | 40.023 | 1.00 | 58.56  | C |
| ATOM | 6211 | O   | MET | 777 | -77.905 | 27.763 | 39.234 | 1.00 | 58.56  | O |
| ATOM | 6212 | N   | ALA | 778 | -76.471 | 28.214 | 40.914 | 1.00 | 41.44  | N |
| ATOM | 6213 | CA  | ALA | 778 | -75.963 | 26.869 | 40.971 | 1.00 | 41.44  | C |
| ATOM | 6214 | CB  | ALA | 778 | -74.850 | 26.700 | 42.019 | 1.00 | 41.44  | C |
| ATOM | 6215 | C   | ALA | 778 | -77.067 | 25.923 | 41.338 | 1.00 | 41.44  | C |
| ATOM | 6216 | O   | ALA | 778 | -77.219 | 24.868 | 40.722 | 1.00 | 41.44  | O |
| ATOM | 6217 | N   | ASN | 779 | -77.885 | 26.289 | 42.343 | 1.00 | 47.30  | N |
| ATOM | 6218 | CA  | ASN | 779 | -78.945 | 25.437 | 42.808 | 1.00 | 47.30  | C |
| ATOM | 6219 | CB  | ASN | 779 | -79.707 | 26.022 | 44.009 | 1.00 | 47.30  | C |
| ATOM | 6220 | CG  | ASN | 779 | -78.771 | 26.045 | 45.208 | 1.00 | 47.30  | C |
| ATOM | 6221 | OD1 | ASN | 779 | -78.148 | 25.042 | 45.547 | 1.00 | 47.30  | O |
| ATOM | 6222 | ND2 | ASN | 779 | -78.669 | 27.230 | 45.866 | 1.00 | 47.30  | N |
| ATOM | 6223 | C   | ASN | 779 | -79.944 | 25.270 | 41.708 | 1.00 | 47.30  | C |
| ATOM | 6224 | O   | ASN | 779 | -80.542 | 24.207 | 41.554 | 1.00 | 47.30  | O |
| ATOM | 6225 | N   | ALA | 780 | -80.174 | 26.347 | 40.937 | 1.00 | 38.81  | N |
| ATOM | 6226 | CA  | ALA | 780 | -81.128 | 26.325 | 39.868 | 1.00 | 38.81  | C |
| ATOM | 6227 | CB  | ALA | 780 | -81.278 | 27.693 | 39.182 | 1.00 | 38.81  | C |
| ATOM | 6228 | C   | ALA | 780 | -80.693 | 25.341 | 38.822 | 1.00 | 38.81  | C |
| ATOM | 6229 | O   | ALA | 780 | -81.510 | 24.591 | 38.290 | 1.00 | 38.81  | O |
| ATOM | 6230 | N   | ILE | 781 | -79.386 | 25.326 | 38.495 | 1.00 | 115.70 | N |
| ATOM | 6231 | CA  | ILE | 781 | -78.855 | 24.460 | 37.472 | 1.00 | 115.70 | C |
| ATOM | 6232 | CB  | ILE | 781 | -77.375 | 24.639 | 37.266 | 1.00 | 115.70 | C |
| ATOM | 6233 | CG1 | ILE | 781 | -77.004 | 26.077 | 36.858 | 1.00 | 115.70 | C |
| ATOM | 6234 | CG2 | ILE | 781 | -76.930 | 23.574 | 36.247 | 1.00 | 115.70 | C |
| ATOM | 6235 | CD1 | ILE | 781 | -77.485 | 26.493 | 35.472 | 1.00 | 115.70 | C |
| ATOM | 6236 | C   | ILE | 781 | -79.017 | 23.032 | 37.899 | 1.00 | 115.70 | C |
| ATOM | 6237 | O   | ILE | 781 | -79.459 | 22.178 | 37.133 | 1.00 | 115.70 | O |
| ATOM | 6238 | N   | CYS | 782 | -78.655 | 22.740 | 39.158 | 1.00 | 69.04  | N |
| ATOM | 6239 | CA  | CYS | 782 | -78.694 | 21.397 | 39.658 | 1.00 | 69.04  | C |
| ATOM | 6240 | CB  | CYS | 782 | -78.043 | 21.266 | 41.044 | 1.00 | 69.04  | C |
| ATOM | 6241 | SG  | CYS | 782 | -76.243 | 21.529 | 40.959 | 1.00 | 69.04  | S |
| ATOM | 6242 | C   | CYS | 782 | -80.114 | 20.915 | 39.703 | 1.00 | 69.04  | C |
| ATOM | 6243 | O   | CYS | 782 | -80.365 | 19.718 | 39.576 | 1.00 | 69.04  | O |
| ATOM | 6244 | N   | SER | 783 | -81.082 | 21.822 | 39.937 | 1.00 | 59.25  | N |
| ATOM | 6245 | CA  | SER | 783 | -82.469 | 21.432 | 39.979 | 1.00 | 59.25  | C |
| ATOM | 6246 | CB  | SER | 783 | -83.401 | 22.548 | 40.484 | 1.00 | 59.25  | C |
| ATOM | 6247 | OG  | SER | 783 | -83.117 | 22.852 | 41.841 | 1.00 | 59.25  | O |
| ATOM | 6248 | C   | SER | 783 | -82.956 | 21.077 | 38.605 | 1.00 | 59.25  | C |
| ATOM | 6249 | O   | SER | 783 | -83.846 | 20.244 | 38.451 | 1.00 | 59.25  | O |
| ATOM | 6250 | N   | ALA | 784 | -82.447 | 21.785 | 37.584 | 1.00 | 72.96  | N |
| ATOM | 6251 | CA  | ALA | 784 | -82.797 | 21.618 | 36.200 | 1.00 | 72.96  | C |
| ATOM | 6252 | CB  | ALA | 784 | -82.321 | 22.784 | 35.318 | 1.00 | 72.96  | C |
| ATOM | 6253 | C   | ALA | 784 | -82.235 | 20.360 | 35.613 | 1.00 | 72.96  | C |
| ATOM | 6254 | O   | ALA | 784 | -82.822 | 19.787 | 34.698 | 1.00 | 72.96  | O |
| ATOM | 6255 | N   | VAL | 785 | -81.041 | 19.934 | 36.067 | 1.00 | 132.50 | N |
| ATOM | 6256 | CA  | VAL | 785 | -80.407 | 18.803 | 35.439 | 1.00 | 132.50 | C |
| ATOM | 6257 | CB  | VAL | 785 | -78.922 | 18.961 | 35.262 | 1.00 | 132.50 | C |
| ATOM | 6258 | CG1 | VAL | 785 | -78.200 | 18.511 | 36.542 | 1.00 | 132.50 | C |
| ATOM | 6259 | CG2 | VAL | 785 | -78.502 | 18.221 | 33.987 | 1.00 | 132.50 | C |
| ATOM | 6260 | C   | VAL | 785 | -80.654 | 17.572 | 36.262 | 1.00 | 132.50 | C |
| ATOM | 6261 | O   | VAL | 785 | -80.639 | 17.619 | 37.489 | 1.00 | 132.50 | O |
| ATOM | 6262 | N   | PRO | 786 | -80.851 | 16.450 | 35.610 | 1.00 | 104.70 | N |
| ATOM | 6263 | CA  | PRO | 786 | -81.143 | 15.215 | 36.284 | 1.00 | 104.70 | C |
| ATOM | 6264 | CD  | PRO | 786 | -81.211 | 16.417 | 34.202 | 1.00 | 104.70 | C |
| ATOM | 6265 | CB  | PRO | 786 | -81.327 | 14.183 | 35.174 | 1.00 | 104.70 | C |
| ATOM | 6266 | CG  | PRO | 786 | -81.819 | 15.021 | 33.977 | 1.00 | 104.70 | C |
| ATOM | 6267 | C   | PRO | 786 | -80.081 | 14.876 | 37.279 | 1.00 | 104.70 | C |
| ATOM | 6268 | O   | PRO | 786 | -78.897 | 15.023 | 36.977 | 1.00 | 104.70 | O |
| ATOM | 6269 | N   | VAL | 787 | -80.493 | 14.402 | 38.473 | 1.00 | 81.45  | N |
| ATOM | 6270 | CA  | VAL | 787 | -79.542 | 14.141 | 39.516 | 1.00 | 81.45  | C |
| ATOM | 6271 | CB  | VAL | 787 | -80.162 | 13.813 | 40.837 | 1.00 | 81.45  | C |
| ATOM | 6272 | CG1 | VAL | 787 | -79.072 | 13.261 | 41.768 | 1.00 | 81.45  | C |
| ATOM | 6273 | CG2 | VAL | 787 | -80.780 | 15.104 | 41.390 | 1.00 | 81.45  | C |
| ATOM | 6274 | C   | VAL | 787 | -78.598 | 13.043 | 39.142 | 1.00 | 81.45  | C |

|      |      |     |     |     |         |        |        |            |       |   |
|------|------|-----|-----|-----|---------|--------|--------|------------|-------|---|
| ATOM | 6275 | O   | VAL | 787 | -77.427 | 13.072 | 39.520 | 1.00       | 81.45 | O |
| ATOM | 6276 | N   | ASP | 788 | -79.084 | 12.046 | 38.386 | 1.00       | 85.57 | N |
| ATOM | 6277 | CA  | ASP | 788 | -78.320 | 10.883 | 38.032 | 1.00       | 85.57 | C |
| ATOM | 6278 | CB  | ASP | 788 | -79.085 | 9.957  | 37.067 | 1.00       | 85.57 | C |
| ATOM | 6279 | CG  | ASP | 788 | -80.443 | 9.591  | 37.644 | 1.00       | 85.57 | C |
| ATOM | 6280 | OD1 | ASP | 788 | -81.188 | 10.524 | 38.049 | 1.00       | 85.57 | O |
| ATOM | 6281 | OD2 | ASP | 788 | -80.757 | 8.372  | 37.681 | 1.00       | 85.57 | O |
| ATOM | 6282 | C   | ASP | 788 | -77.112 | 11.281 | 37.245 | 1.00       | 85.57 | C |
| ATOM | 6283 | O   | ASP | 788 | -76.032 | 10.719 | 37.415 | 1.00       | 85.57 | O |
| ATOM | 6284 | N   | TRP | 789 | -77.268 | 12.272 | 36.355 | 1.00129.93 |       | N |
| ATOM | 6285 | CA  | TRP | 789 | -76.233 | 12.595 | 35.422 | 1.00129.93 |       | C |
| ATOM | 6286 | CB  | TRP | 789 | -76.665 | 13.682 | 34.421 | 1.00129.93 |       | C |
| ATOM | 6287 | CG  | TRP | 789 | -77.744 | 13.204 | 33.480 | 1.00129.93 |       | C |
| ATOM | 6288 | CD2 | TRP | 789 | -78.359 | 14.005 | 32.457 | 1.00129.93 |       | C |
| ATOM | 6289 | CD1 | TRP | 789 | -78.321 | 11.970 | 33.400 | 1.00129.93 |       | C |
| ATOM | 6290 | NE1 | TRP | 789 | -79.251 | 11.949 | 32.388 | 1.00129.93 |       | N |
| ATOM | 6291 | CE2 | TRP | 789 | -79.285 | 13.194 | 31.800 | 1.00129.93 |       | C |
| ATOM | 6292 | CE3 | TRP | 789 | -78.166 | 15.307 | 32.094 | 1.00129.93 |       | C |
| ATOM | 6293 | CZ2 | TRP | 789 | -80.033 | 13.675 | 30.765 | 1.00129.93 |       | C |
| ATOM | 6294 | CZ3 | TRP | 789 | -78.925 | 15.789 | 31.050 | 1.00129.93 |       | C |
| ATOM | 6295 | CH2 | TRP | 789 | -79.840 | 14.989 | 30.398 | 1.00129.93 |       | C |
| ATOM | 6296 | C   | TRP | 789 | -74.989 | 13.035 | 36.119 | 1.00129.93 |       | C |
| ATOM | 6297 | O   | TRP | 789 | -74.992 | 13.924 | 36.966 | 1.00129.93 |       | O |
| ATOM | 6298 | N   | VAL | 790 | -73.837 | 12.467 | 35.698 | 1.00301.89 |       | N |
| ATOM | 6299 | CA  | VAL | 790 | -72.536 | 12.832 | 36.201 | 1.00301.89 |       | C |
| ATOM | 6300 | CB  | VAL | 790 | -71.491 | 11.752 | 35.986 | 1.00301.89 |       | C |
| ATOM | 6301 | CG1 | VAL | 790 | -71.750 | 10.635 | 37.004 | 1.00301.89 |       | C |
| ATOM | 6302 | CG2 | VAL | 790 | -71.590 | 11.212 | 34.547 | 1.00301.89 |       | C |
| ATOM | 6303 | C   | VAL | 790 | -72.229 | 14.184 | 35.621 | 1.00301.89 |       | C |
| ATOM | 6304 | O   | VAL | 790 | -73.198 | 14.804 | 35.216 | 1.00301.89 |       | O |
| ATOM | 6305 | N   | PRO | 791 | -71.017 | 14.699 | 35.568 | 1.00598.72 |       | N |
| ATOM | 6306 | CA  | PRO | 791 | -70.762 | 16.035 | 35.088 | 1.00598.72 |       | C |
| ATOM | 6307 | CD  | PRO | 791 | -70.738 | 14.086 | 34.270 | 1.00598.72 |       | C |
| ATOM | 6308 | CB  | PRO | 791 | -71.462 | 16.463 | 33.916 | 1.00598.72 |       | C |
| ATOM | 6309 | CG  | PRO | 791 | -71.392 | 15.048 | 33.196 | 1.00598.72 |       | C |
| ATOM | 6310 | C   | PRO | 791 | -69.320 | 15.924 | 34.689 | 1.00598.72 |       | C |
| ATOM | 6311 | O   | PRO | 791 | -68.474 | 15.295 | 35.327 | 1.00598.72 |       | O |
| ATOM | 6312 | N   | THR | 792 | -69.087 | 16.630 | 33.571 | 1.00738.52 |       | N |
| ATOM | 6313 | CA  | THR | 792 | -67.908 | 16.468 | 32.820 | 1.00738.52 |       | C |
| ATOM | 6314 | CB  | THR | 792 | -68.016 | 15.410 | 31.759 | 1.00738.52 |       | C |
| ATOM | 6315 | OG1 | THR | 792 | -69.034 | 15.747 | 30.828 | 1.00738.52 |       | O |
| ATOM | 6316 | CG2 | THR | 792 | -68.333 | 14.062 | 32.427 | 1.00738.52 |       | C |
| ATOM | 6317 | C   | THR | 792 | -67.654 | 17.749 | 32.135 | 1.00738.52 |       | C |
| ATOM | 6318 | O   | THR | 792 | -68.503 | 18.637 | 32.075 | 1.00738.52 |       | O |
| ATOM | 6319 | N   | GLY | 793 | -66.450 | 17.847 | 31.574 | 1.00999.99 |       | N |
| ATOM | 6320 | CA  | GLY | 793 | -66.037 | 19.022 | 30.880 | 1.00999.99 |       | C |
| ATOM | 6321 | C   | GLY | 793 | -65.134 | 19.794 | 31.779 | 1.00999.99 |       | C |
| ATOM | 6322 | O   | GLY | 793 | -65.038 | 19.517 | 32.971 | 1.00999.99 |       | O |
| ATOM | 6323 | N   | ARG | 794 | -64.452 | 20.802 | 31.210 | 1.00999.99 |       | N |
| ATOM | 6324 | CA  | ARG | 794 | -63.484 | 21.550 | 31.951 | 1.00999.99 |       | C |
| ATOM | 6325 | CB  | ARG | 794 | -62.243 | 21.886 | 31.103 | 1.00999.99 |       | C |
| ATOM | 6326 | CG  | ARG | 794 | -61.007 | 22.235 | 31.928 | 1.00999.99 |       | C |
| ATOM | 6327 | CD  | ARG | 794 | -59.770 | 22.571 | 31.094 | 1.00999.99 |       | C |
| ATOM | 6328 | NE  | ARG | 794 | -58.605 | 22.417 | 32.007 | 1.00999.99 |       | N |
| ATOM | 6329 | CZ  | ARG | 794 | -57.866 | 21.273 | 31.970 | 1.00999.99 |       | C |
| ATOM | 6330 | NH1 | ARG | 794 | -58.054 | 20.380 | 30.955 | 1.00999.99 |       | N |
| ATOM | 6331 | NH2 | ARG | 794 | -56.937 | 21.021 | 32.938 | 1.00999.99 |       | N |
| ATOM | 6332 | C   | ARG | 794 | -64.107 | 22.844 | 32.376 | 1.00999.99 |       | C |
| ATOM | 6333 | O   | ARG | 794 | -64.722 | 23.557 | 31.586 | 1.00999.99 |       | O |
| ATOM | 6334 | N   | THR | 795 | -64.114 | 23.080 | 33.697 | 1.00738.38 |       | N |
| ATOM | 6335 | CA  | THR | 795 | -64.501 | 24.329 | 34.273 | 1.00738.38 |       | C |
| ATOM | 6336 | CB  | THR | 795 | -65.105 | 24.169 | 35.633 | 1.00738.38 |       | C |
| ATOM | 6337 | OG1 | THR | 795 | -64.180 | 23.534 | 36.498 | 1.00738.38 |       | O |
| ATOM | 6338 | CG2 | THR | 795 | -66.382 | 23.322 | 35.519 | 1.00738.38 |       | C |
| ATOM | 6339 | C   | THR | 795 | -63.328 | 25.271 | 34.384 | 1.00738.38 |       | C |
| ATOM | 6340 | O   | THR | 795 | -63.497 | 26.487 | 34.344 | 1.00738.38 |       | O |



|      |      |     |     |     |         |        |        |            |   |
|------|------|-----|-----|-----|---------|--------|--------|------------|---|
| ATOM | 6341 | N   | THR | 796 | -62.096 | 24.759 | 34.606 | 1.00649.85 | N |
| ATOM | 6342 | CA  | THR | 796 | -61.004 | 25.688 | 34.794 | 1.00649.85 | C |
| ATOM | 6343 | CB  | THR | 796 | -60.756 | 25.994 | 36.247 | 1.00649.85 | C |
| ATOM | 6344 | OG1 | THR | 796 | -61.940 | 26.472 | 36.865 | 1.00649.85 | O |
| ATOM | 6345 | CG2 | THR | 796 | -59.681 | 27.082 | 36.343 | 1.00649.85 | C |
| ATOM | 6346 | C   | THR | 796 | -59.715 | 25.129 | 34.245 | 1.00649.85 | C |
| ATOM | 6347 | O   | THR | 796 | -59.539 | 23.917 | 34.178 | 1.00649.85 | O |
| ATOM | 6348 | N   | TRP | 797 | -58.827 | 26.012 | 33.725 | 1.00557.60 | N |
| ATOM | 6349 | CA  | TRP | 797 | -57.492 | 25.676 | 33.274 | 1.00557.60 | C |
| ATOM | 6350 | CB  | TRP | 797 | -56.995 | 26.500 | 32.076 | 1.00557.60 | C |
| ATOM | 6351 | CG  | TRP | 797 | -57.589 | 25.986 | 30.786 | 1.00557.60 | C |
| ATOM | 6352 | CD2 | TRP | 797 | -57.087 | 24.834 | 30.091 | 1.00557.60 | C |
| ATOM | 6353 | CD1 | TRP | 797 | -58.666 | 26.426 | 30.076 | 1.00557.60 | C |
| ATOM | 6354 | NE1 | TRP | 797 | -58.868 | 25.618 | 28.981 | 1.00557.60 | N |
| ATOM | 6355 | CE2 | TRP | 797 | -57.902 | 24.633 | 28.979 | 1.00557.60 | C |
| ATOM | 6356 | CE3 | TRP | 797 | -56.034 | 24.005 | 30.362 | 1.00557.60 | C |
| ATOM | 6357 | CZ2 | TRP | 797 | -57.680 | 23.598 | 28.117 | 1.00557.60 | C |
| ATOM | 6358 | CZ3 | TRP | 797 | -55.808 | 22.965 | 29.488 | 1.00557.60 | C |
| ATOM | 6359 | CH2 | TRP | 797 | -56.615 | 22.766 | 28.386 | 1.00557.60 | C |
| ATOM | 6360 | C   | TRP | 797 | -56.466 | 25.679 | 34.356 | 1.00557.60 | C |
| ATOM | 6361 | O   | TRP | 797 | -55.459 | 24.977 | 34.264 | 1.00557.60 | O |
| ATOM | 6362 | N   | SER | 798 | -56.678 | 26.494 | 35.401 | 1.00274.26 | N |
| ATOM | 6363 | CA  | SER | 798 | -55.670 | 26.684 | 36.400 | 1.00274.26 | C |
| ATOM | 6364 | CB  | SER | 798 | -56.144 | 27.573 | 37.562 | 1.00274.26 | C |
| ATOM | 6365 | OG  | SER | 798 | -55.108 | 27.727 | 38.519 | 1.00274.26 | O |
| ATOM | 6366 | C   | SER | 798 | -55.214 | 25.371 | 36.967 | 1.00274.26 | C |
| ATOM | 6367 | O   | SER | 798 | -55.981 | 24.431 | 37.163 | 1.00274.26 | O |
| ATOM | 6368 | N   | ILE | 799 | -53.898 | 25.303 | 37.234 | 1.00208.01 | N |
| ATOM | 6369 | CA  | ILE | 799 | -53.224 | 24.172 | 37.799 | 1.00208.01 | C |
| ATOM | 6370 | CB  | ILE | 799 | -51.732 | 24.359 | 37.861 | 1.00208.01 | C |
| ATOM | 6371 | CG1 | ILE | 799 | -51.035 | 23.045 | 38.254 | 1.00208.01 | C |
| ATOM | 6372 | CG2 | ILE | 799 | -51.424 | 25.547 | 38.788 | 1.00208.01 | C |
| ATOM | 6373 | CD1 | ILE | 799 | -49.524 | 23.056 | 38.008 | 1.00208.01 | C |
| ATOM | 6374 | C   | ILE | 799 | -53.752 | 23.948 | 39.190 | 1.00208.01 | C |
| ATOM | 6375 | O   | ILE | 799 | -53.748 | 22.830 | 39.702 | 1.00208.01 | O |
| ATOM | 6376 | N   | HIS | 800 | -54.151 | 25.040 | 39.862 | 1.00279.51 | N |
| ATOM | 6377 | CA  | HIS | 800 | -54.650 | 25.046 | 41.206 | 1.00279.51 | C |
| ATOM | 6378 | ND1 | HIS | 800 | -52.167 | 26.477 | 42.479 | 1.00279.51 | N |
| ATOM | 6379 | CG  | HIS | 800 | -53.208 | 26.972 | 41.724 | 1.00279.51 | C |
| ATOM | 6380 | CB  | HIS | 800 | -54.619 | 26.459 | 41.801 | 1.00279.51 | C |
| ATOM | 6381 | NE2 | HIS | 800 | -51.298 | 28.032 | 41.148 | 1.00279.51 | N |
| ATOM | 6382 | CD2 | HIS | 800 | -52.658 | 27.923 | 40.918 | 1.00279.51 | C |
| ATOM | 6383 | CE1 | HIS | 800 | -51.050 | 27.144 | 42.094 | 1.00279.51 | C |
| ATOM | 6384 | C   | HIS | 800 | -56.016 | 24.409 | 41.335 | 1.00279.51 | C |
| ATOM | 6385 | O   | HIS | 800 | -56.411 | 24.028 | 42.437 | 1.00279.51 | O |
| ATOM | 6386 | N   | GLY | 801 | -56.816 | 24.346 | 40.249 | 1.00188.97 | N |
| ATOM | 6387 | CA  | GLY | 801 | -58.122 | 23.726 | 40.316 | 1.00188.97 | C |
| ATOM | 6388 | C   | GLY | 801 | -57.982 | 22.241 | 40.517 | 1.00188.97 | C |
| ATOM | 6389 | O   | GLY | 801 | -57.391 | 21.542 | 39.693 | 1.00188.97 | O |
| ATOM | 6390 | N   | LYS | 802 | -58.505 | 21.742 | 41.661 | 1.00278.16 | N |
| ATOM | 6391 | CA  | LYS | 802 | -58.555 | 20.351 | 42.027 | 1.00278.16 | C |
| ATOM | 6392 | CB  | LYS | 802 | -58.635 | 20.132 | 43.544 | 1.00278.16 | C |
| ATOM | 6393 | CG  | LYS | 802 | -57.246 | 20.109 | 44.185 | 1.00278.16 | C |
| ATOM | 6394 | CD  | LYS | 802 | -56.453 | 21.404 | 44.032 | 1.00278.16 | C |
| ATOM | 6395 | CE  | LYS | 802 | -54.997 | 21.270 | 44.487 | 1.00278.16 | C |
| ATOM | 6396 | NZ  | LYS | 802 | -54.238 | 20.429 | 43.532 | 1.00278.16 | N |
| ATOM | 6397 | C   | LYS | 802 | -59.643 | 19.560 | 41.351 | 1.00278.16 | C |
| ATOM | 6398 | O   | LYS | 802 | -59.449 | 18.375 | 41.094 | 1.00278.16 | O |
| ATOM | 6399 | N   | GLY | 803 | -60.832 | 20.148 | 41.093 | 1.00167.41 | N |
| ATOM | 6400 | CA  | GLY | 803 | -61.852 | 19.406 | 40.384 | 1.00167.41 | C |
| ATOM | 6401 | C   | GLY | 803 | -62.682 | 18.538 | 41.291 | 1.00167.41 | C |
| ATOM | 6402 | O   | GLY | 803 | -63.336 | 17.599 | 40.836 | 1.00167.41 | O |
| ATOM | 6403 | N   | GLU | 804 | -62.727 | 18.846 | 42.596 | 1.00232.09 | N |
| ATOM | 6404 | CA  | GLU | 804 | -63.495 | 18.027 | 43.497 | 1.00232.09 | C |
| ATOM | 6405 | CB  | GLU | 804 | -63.283 | 18.341 | 44.990 | 1.00232.09 | C |
| ATOM | 6406 | CG  | GLU | 804 | -63.271 | 19.823 | 45.333 | 1.00232.09 | C |

|      |      |     |     |     |         |        |        |            |   |
|------|------|-----|-----|-----|---------|--------|--------|------------|---|
| ATOM | 6407 | CD  | GLU | 804 | -61.856 | 20.327 | 45.099 | 1.00232.09 | C |
| ATOM | 6408 | OE1 | GLU | 804 | -60.977 | 19.474 | 44.812 | 1.00232.09 | O |
| ATOM | 6409 | OE2 | GLU | 804 | -61.630 | 21.563 | 45.206 | 1.00232.09 | O |
| ATOM | 6410 | C   | GLU | 804 | -64.961 | 18.059 | 43.137 | 1.00232.09 | C |
| ATOM | 6411 | O   | GLU | 804 | -65.725 | 17.187 | 43.548 | 1.00232.09 | O |
| ATOM | 6412 | N   | TRP | 805 | -65.405 | 19.098 | 42.403 | 1.00187.34 | N |
| ATOM | 6413 | CA  | TRP | 805 | -66.767 | 19.271 | 41.962 | 1.00187.34 | C |
| ATOM | 6414 | CB  | TRP | 805 | -67.055 | 20.688 | 41.440 | 1.00187.34 | C |
| ATOM | 6415 | CG  | TRP | 805 | -66.081 | 21.178 | 40.403 | 1.00187.34 | C |
| ATOM | 6416 | CD2 | TRP | 805 | -64.856 | 21.851 | 40.725 | 1.00187.34 | C |
| ATOM | 6417 | CD1 | TRP | 805 | -66.138 | 21.103 | 39.044 | 1.00187.34 | C |
| ATOM | 6418 | NE1 | TRP | 805 | -65.019 | 21.684 | 38.496 | 1.00187.34 | N |
| ATOM | 6419 | CE2 | TRP | 805 | -64.222 | 22.151 | 39.522 | 1.00187.34 | C |
| ATOM | 6420 | CE3 | TRP | 805 | -64.306 | 22.191 | 41.927 | 1.00187.34 | C |
| ATOM | 6421 | CZ2 | TRP | 805 | -63.019 | 22.798 | 39.501 | 1.00187.34 | C |
| ATOM | 6422 | CZ3 | TRP | 805 | -63.094 | 22.844 | 41.904 | 1.00187.34 | C |
| ATOM | 6423 | CH2 | TRP | 805 | -62.463 | 23.143 | 40.714 | 1.00187.34 | C |
| ATOM | 6424 | C   | TRP | 805 | -67.184 | 18.250 | 40.927 | 1.00187.34 | C |
| ATOM | 6425 | O   | TRP | 805 | -68.379 | 18.086 | 40.674 | 1.00187.34 | O |
| ATOM | 6426 | N   | MET | 806 | -66.240 | 17.594 | 40.220 | 1.00333.83 | N |
| ATOM | 6427 | CA  | MET | 806 | -66.712 | 16.615 | 39.274 | 1.00333.83 | C |
| ATOM | 6428 | CB  | MET | 806 | -65.714 | 16.228 | 38.173 | 1.00333.83 | C |
| ATOM | 6429 | CG  | MET | 806 | -65.696 | 17.196 | 36.994 | 1.00333.83 | C |
| ATOM | 6430 | SD  | MET | 806 | -64.990 | 18.827 | 37.336 | 1.00333.83 | S |
| ATOM | 6431 | CE  | MET | 806 | -65.403 | 19.460 | 35.689 | 1.00333.83 | C |
| ATOM | 6432 | C   | MET | 806 | -67.066 | 15.359 | 39.998 | 1.00333.83 | C |
| ATOM | 6433 | O   | MET | 806 | -66.293 | 14.401 | 40.013 | 1.00333.83 | O |
| ATOM | 6434 | N   | THR | 807 | -68.276 | 15.328 | 40.593 | 1.00188.44 | N |
| ATOM | 6435 | CA  | THR | 807 | -68.705 | 14.168 | 41.315 | 1.00188.44 | C |
| ATOM | 6436 | CB  | THR | 807 | -68.301 | 14.206 | 42.760 | 1.00188.44 | C |
| ATOM | 6437 | OG1 | THR | 807 | -66.904 | 14.408 | 42.883 | 1.00188.44 | O |
| ATOM | 6438 | CG2 | THR | 807 | -68.649 | 12.861 | 43.401 | 1.00188.44 | C |
| ATOM | 6439 | C   | THR | 807 | -70.204 | 14.155 | 41.310 | 1.00188.44 | C |
| ATOM | 6440 | O   | THR | 807 | -70.849 | 15.155 | 40.999 | 1.00188.44 | O |
| ATOM | 6441 | N   | THR | 808 | -70.781 | 12.963 | 41.556 | 1.00137.20 | N |
| ATOM | 6442 | CA  | THR | 808 | -72.187 | 12.757 | 41.749 | 1.00137.20 | C |
| ATOM | 6443 | CB  | THR | 808 | -72.626 | 11.359 | 41.424 | 1.00137.20 | C |
| ATOM | 6444 | OG1 | THR | 808 | -72.306 | 11.045 | 40.075 | 1.00137.20 | O |
| ATOM | 6445 | CG2 | THR | 808 | -74.147 | 11.275 | 41.626 | 1.00137.20 | C |
| ATOM | 6446 | C   | THR | 808 | -72.559 | 13.038 | 43.180 | 1.00137.20 | C |
| ATOM | 6447 | O   | THR | 808 | -73.721 | 13.311 | 43.476 | 1.00137.20 | O |
| ATOM | 6448 | N   | GLU | 809 | -71.579 | 12.933 | 44.112 | 1.00114.15 | N |
| ATOM | 6449 | CA  | GLU | 809 | -71.825 | 13.012 | 45.530 | 1.00114.15 | C |
| ATOM | 6450 | CB  | GLU | 809 | -70.605 | 12.697 | 46.421 | 1.00114.15 | C |
| ATOM | 6451 | CG  | GLU | 809 | -69.512 | 13.766 | 46.438 | 1.00114.15 | C |
| ATOM | 6452 | CD  | GLU | 809 | -68.397 | 13.271 | 47.352 | 1.00114.15 | C |
| ATOM | 6453 | OE1 | GLU | 809 | -67.874 | 12.156 | 47.083 | 1.00114.15 | O |
| ATOM | 6454 | OE2 | GLU | 809 | -68.053 | 13.991 | 48.327 | 1.00114.15 | O |
| ATOM | 6455 | C   | GLU | 809 | -72.351 | 14.355 | 45.917 | 1.00114.15 | C |
| ATOM | 6456 | O   | GLU | 809 | -72.217 | 15.331 | 45.181 | 1.00114.15 | O |
| ATOM | 6457 | N   | ASP | 810 | -73.009 | 14.402 | 47.098 | 1.00 59.03 | N |
| ATOM | 6458 | CA  | ASP | 810 | -73.615 | 15.600 | 47.602 | 1.00 59.03 | C |
| ATOM | 6459 | CB  | ASP | 810 | -74.341 | 15.408 | 48.945 | 1.00 59.03 | C |
| ATOM | 6460 | CG  | ASP | 810 | -75.142 | 16.670 | 49.243 | 1.00 59.03 | C |
| ATOM | 6461 | OD1 | ASP | 810 | -75.496 | 17.397 | 48.277 | 1.00 59.03 | O |
| ATOM | 6462 | OD2 | ASP | 810 | -75.403 | 16.928 | 50.448 | 1.00 59.03 | O |
| ATOM | 6463 | C   | ASP | 810 | -72.546 | 16.626 | 47.802 | 1.00 59.03 | C |
| ATOM | 6464 | O   | ASP | 810 | -71.508 | 16.363 | 48.407 | 1.00 59.03 | O |
| ATOM | 6465 | N   | MET | 811 | -72.811 | 17.846 | 47.304 | 1.00 88.81 | N |
| ATOM | 6466 | CA  | MET | 811 | -71.868 | 18.925 | 47.335 | 1.00 88.81 | C |
| ATOM | 6467 | CB  | MET | 811 | -72.295 | 20.146 | 46.498 | 1.00 88.81 | C |
| ATOM | 6468 | CG  | MET | 811 | -72.233 | 19.931 | 44.978 | 1.00 88.81 | C |
| ATOM | 6469 | SD  | MET | 811 | -70.559 | 19.774 | 44.277 | 1.00 88.81 | S |
| ATOM | 6470 | CE  | MET | 811 | -70.368 | 17.999 | 44.598 | 1.00 88.81 | C |
| ATOM | 6471 | C   | MET | 811 | -71.601 | 19.369 | 48.740 | 1.00 88.81 | C |
| ATOM | 6472 | O   | MET | 811 | -70.506 | 19.840 | 49.041 | 1.00 88.81 | O |

|      |      |     |     |     |         |        |        |            |   |
|------|------|-----|-----|-----|---------|--------|--------|------------|---|
| ATOM | 6473 | N   | LEU | 812 | -72.599 | 19.272 | 49.634 | 1.00127.27 | N |
| ATOM | 6474 | CA  | LEU | 812 | -72.416 | 19.733 | 50.981 | 1.00127.27 | C |
| ATOM | 6475 | CB  | LEU | 812 | -73.731 | 19.674 | 51.782 | 1.00127.27 | C |
| ATOM | 6476 | CG  | LEU | 812 | -73.749 | 20.540 | 53.059 | 1.00127.27 | C |
| ATOM | 6477 | CD1 | LEU | 812 | -75.089 | 20.416 | 53.793 | 1.00127.27 | C |
| ATOM | 6478 | CD2 | LEU | 812 | -72.558 | 20.269 | 53.979 | 1.00127.27 | C |
| ATOM | 6479 | C   | LEU | 812 | -71.357 | 18.877 | 51.621 | 1.00127.27 | C |
| ATOM | 6480 | O   | LEU | 812 | -70.525 | 19.368 | 52.383 | 1.00127.27 | O |
| ATOM | 6481 | N   | MET | 813 | -71.359 | 17.561 | 51.323 | 1.00132.94 | N |
| ATOM | 6482 | CA  | MET | 813 | -70.388 | 16.664 | 51.892 | 1.00132.94 | C |
| ATOM | 6483 | CB  | MET | 813 | -70.624 | 15.196 | 51.492 | 1.00132.94 | C |
| ATOM | 6484 | CG  | MET | 813 | -69.792 | 14.189 | 52.295 | 1.00132.94 | C |
| ATOM | 6485 | SD  | MET | 813 | -68.003 | 14.207 | 51.962 | 1.00132.94 | S |
| ATOM | 6486 | CE  | MET | 813 | -67.609 | 12.893 | 53.151 | 1.00132.94 | C |
| ATOM | 6487 | C   | MET | 813 | -69.023 | 17.048 | 51.405 | 1.00132.94 | C |
| ATOM | 6488 | O   | MET | 813 | -68.064 | 17.069 | 52.173 | 1.00132.94 | O |
| ATOM | 6489 | N   | VAL | 814 | -68.910 | 17.364 | 50.100 | 1.00 75.61 | N |
| ATOM | 6490 | CA  | VAL | 814 | -67.656 | 17.721 | 49.497 | 1.00 75.61 | C |
| ATOM | 6491 | CB  | VAL | 814 | -67.791 | 18.031 | 48.029 | 1.00 75.61 | C |
| ATOM | 6492 | CG1 | VAL | 814 | -66.436 | 18.510 | 47.494 | 1.00 75.61 | C |
| ATOM | 6493 | CG2 | VAL | 814 | -68.337 | 16.799 | 47.299 | 1.00 75.61 | C |
| ATOM | 6494 | C   | VAL | 814 | -67.168 | 18.982 | 50.132 | 1.00 75.61 | C |
| ATOM | 6495 | O   | VAL | 814 | -65.981 | 19.131 | 50.417 | 1.00 75.61 | O |
| ATOM | 6496 | N   | TRP | 815 | -68.094 | 19.923 | 50.379 | 1.00 85.73 | N |
| ATOM | 6497 | CA  | TRP | 815 | -67.752 | 21.210 | 50.909 | 1.00 85.73 | C |
| ATOM | 6498 | CB  | TRP | 815 | -68.994 | 22.099 | 51.110 | 1.00 85.73 | C |
| ATOM | 6499 | CG  | TRP | 815 | -68.689 | 23.547 | 51.415 | 1.00 85.73 | C |
| ATOM | 6500 | CD2 | TRP | 815 | -68.413 | 24.076 | 52.721 | 1.00 85.73 | C |
| ATOM | 6501 | CD1 | TRP | 815 | -68.613 | 24.598 | 50.549 | 1.00 85.73 | C |
| ATOM | 6502 | NE1 | TRP | 815 | -68.304 | 25.749 | 51.231 | 1.00 85.73 | N |
| ATOM | 6503 | CE2 | TRP | 815 | -68.177 | 25.443 | 52.569 | 1.00 85.73 | C |
| ATOM | 6504 | CE3 | TRP | 815 | -68.356 | 23.475 | 53.944 | 1.00 85.73 | C |
| ATOM | 6505 | CZ2 | TRP | 815 | -67.879 | 26.231 | 53.645 | 1.00 85.73 | C |
| ATOM | 6506 | CZ3 | TRP | 815 | -68.058 | 24.274 | 55.026 | 1.00 85.73 | C |
| ATOM | 6507 | CH2 | TRP | 815 | -67.824 | 25.625 | 54.881 | 1.00 85.73 | C |
| ATOM | 6508 | C   | TRP | 815 | -67.097 | 21.001 | 52.237 | 1.00 85.73 | C |
| ATOM | 6509 | O   | TRP | 815 | -66.083 | 21.626 | 52.545 | 1.00 85.73 | O |
| ATOM | 6510 | N   | ASN | 816 | -67.660 | 20.095 | 53.057 | 1.00 49.95 | N |
| ATOM | 6511 | CA  | ASN | 816 | -67.134 | 19.825 | 54.367 | 1.00 49.95 | C |
| ATOM | 6512 | CB  | ASN | 816 | -67.948 | 18.776 | 55.145 | 1.00 49.95 | C |
| ATOM | 6513 | CG  | ASN | 816 | -69.191 | 19.444 | 55.707 | 1.00 49.95 | C |
| ATOM | 6514 | OD1 | ASN | 816 | -69.097 | 20.399 | 56.476 | 1.00 49.95 | O |
| ATOM | 6515 | ND2 | ASN | 816 | -70.390 | 18.931 | 55.321 | 1.00 49.95 | N |
| ATOM | 6516 | C   | ASN | 816 | -65.752 | 19.276 | 54.241 | 1.00 49.95 | C |
| ATOM | 6517 | O   | ASN | 816 | -64.868 | 19.629 | 55.020 | 1.00 49.95 | O |
| ATOM | 6518 | N   | ARG | 817 | -65.529 | 18.385 | 53.258 | 1.00153.46 | N |
| ATOM | 6519 | CA  | ARG | 817 | -64.247 | 17.762 | 53.127 | 1.00153.46 | C |
| ATOM | 6520 | CB  | ARG | 817 | -64.190 | 16.790 | 51.933 | 1.00153.46 | C |
| ATOM | 6521 | CG  | ARG | 817 | -62.801 | 16.186 | 51.702 | 1.00153.46 | C |
| ATOM | 6522 | CD  | ARG | 817 | -62.636 | 15.471 | 50.357 | 1.00153.46 | C |
| ATOM | 6523 | NE  | ARG | 817 | -63.544 | 14.290 | 50.343 | 1.00153.46 | N |
| ATOM | 6524 | CZ  | ARG | 817 | -64.817 | 14.404 | 49.862 | 1.00153.46 | C |
| ATOM | 6525 | NH1 | ARG | 817 | -65.260 | 15.601 | 49.381 | 1.00153.46 | N |
| ATOM | 6526 | NH2 | ARG | 817 | -65.645 | 13.320 | 49.852 | 1.00153.46 | N |
| ATOM | 6527 | C   | ARG | 817 | -63.188 | 18.789 | 52.863 | 1.00153.46 | C |
| ATOM | 6528 | O   | ARG | 817 | -62.156 | 18.807 | 53.532 | 1.00153.46 | O |
| ATOM | 6529 | N   | VAL | 818 | -63.403 | 19.660 | 51.859 | 1.00 92.69 | N |
| ATOM | 6530 | CA  | VAL | 818 | -62.389 | 20.600 | 51.478 | 1.00 92.69 | C |
| ATOM | 6531 | CB  | VAL | 818 | -62.677 | 21.235 | 50.147 | 1.00 92.69 | C |
| ATOM | 6532 | CG1 | VAL | 818 | -61.562 | 22.241 | 49.827 | 1.00 92.69 | C |
| ATOM | 6533 | CG2 | VAL | 818 | -62.812 | 20.122 | 49.097 | 1.00 92.69 | C |
| ATOM | 6534 | C   | VAL | 818 | -62.188 | 21.707 | 52.467 | 1.00 92.69 | C |
| ATOM | 6535 | O   | VAL | 818 | -61.060 | 22.036 | 52.830 | 1.00 92.69 | O |
| ATOM | 6536 | N   | TRP | 819 | -63.286 | 22.364 | 52.868 | 1.00130.60 | N |
| ATOM | 6537 | CA  | TRP | 819 | -63.199 | 23.509 | 53.726 | 1.00130.60 | C |
| ATOM | 6538 | CB  | TRP | 819 | -64.442 | 24.401 | 53.598 | 1.00130.60 | C |

|      |      |     |     |     |         |        |        |            |   |
|------|------|-----|-----|-----|---------|--------|--------|------------|---|
| ATOM | 6539 | CG  | TRP | 819 | -64.571 | 24.929 | 52.184 | 1.00130.60 | C |
| ATOM | 6540 | CD2 | TRP | 819 | -63.729 | 25.945 | 51.618 | 1.00130.60 | C |
| ATOM | 6541 | CD1 | TRP | 819 | -65.418 | 24.533 | 51.191 | 1.00130.60 | C |
| ATOM | 6542 | NE1 | TRP | 819 | -65.160 | 25.242 | 50.041 | 1.00130.60 | N |
| ATOM | 6543 | CE2 | TRP | 819 | -64.121 | 26.113 | 50.289 | 1.00130.60 | C |
| ATOM | 6544 | CE3 | TRP | 819 | -62.708 | 26.672 | 52.156 | 1.00130.60 | C |
| ATOM | 6545 | CZ2 | TRP | 819 | -63.496 | 27.015 | 49.476 | 1.00130.60 | C |
| ATOM | 6546 | CZ3 | TRP | 819 | -62.085 | 27.587 | 51.336 | 1.00130.60 | C |
| ATOM | 6547 | CH2 | TRP | 819 | -62.471 | 27.755 | 50.021 | 1.00130.60 | C |
| ATOM | 6548 | C   | TRP | 819 | -62.935 | 23.172 | 55.164 | 1.00130.60 | C |
| ATOM | 6549 | O   | TRP | 819 | -62.235 | 23.917 | 55.846 | 1.00130.60 | O |
| ATOM | 6550 | N   | ILE | 820 | -63.645 | 22.165 | 55.712 | 1.00160.23 | N |
| ATOM | 6551 | CA  | ILE | 820 | -63.444 | 21.761 | 57.080 | 1.00160.23 | C |
| ATOM | 6552 | CB  | ILE | 820 | -64.716 | 21.216 | 57.654 | 1.00160.23 | C |
| ATOM | 6553 | CG1 | ILE | 820 | -65.839 | 22.252 | 57.488 | 1.00160.23 | C |
| ATOM | 6554 | CG2 | ILE | 820 | -64.454 | 20.805 | 59.112 | 1.00160.23 | C |
| ATOM | 6555 | CD1 | ILE | 820 | -65.530 | 23.604 | 58.127 | 1.00160.23 | C |
| ATOM | 6556 | C   | ILE | 820 | -62.384 | 20.718 | 57.323 | 1.00160.23 | C |
| ATOM | 6557 | O   | ILE | 820 | -61.374 | 20.975 | 57.976 | 1.00160.23 | O |
| ATOM | 6558 | N   | GLU | 821 | -62.577 | 19.502 | 56.755 | 1.00127.90 | N |
| ATOM | 6559 | CA  | GLU | 821 | -61.738 | 18.406 | 57.168 | 1.00127.90 | C |
| ATOM | 6560 | CB  | GLU | 821 | -62.263 | 17.005 | 56.781 | 1.00127.90 | C |
| ATOM | 6561 | CG  | GLU | 821 | -62.357 | 16.705 | 55.287 | 1.00127.90 | C |
| ATOM | 6562 | CD  | GLU | 821 | -62.732 | 15.232 | 55.154 | 1.00127.90 | C |
| ATOM | 6563 | OE1 | GLU | 821 | -62.560 | 14.489 | 56.157 | 1.00127.90 | O |
| ATOM | 6564 | OE2 | GLU | 821 | -63.193 | 14.828 | 54.054 | 1.00127.90 | O |
| ATOM | 6565 | C   | GLU | 821 | -60.330 | 18.528 | 56.684 | 1.00127.90 | C |
| ATOM | 6566 | O   | GLU | 821 | -59.387 | 18.420 | 57.464 | 1.00127.90 | O |
| ATOM | 6567 | N   | GLU | 822 | -60.159 | 18.765 | 55.377 | 1.00131.17 | N |
| ATOM | 6568 | CA  | GLU | 822 | -58.866 | 18.834 | 54.768 | 1.00131.17 | C |
| ATOM | 6569 | CB  | GLU | 822 | -58.883 | 18.586 | 53.247 | 1.00131.17 | C |
| ATOM | 6570 | CG  | GLU | 822 | -59.751 | 19.534 | 52.423 | 1.00131.17 | C |
| ATOM | 6571 | CD  | GLU | 822 | -59.706 | 19.014 | 50.991 | 1.00131.17 | C |
| ATOM | 6572 | OE1 | GLU | 822 | -59.173 | 17.889 | 50.797 | 1.00131.17 | O |
| ATOM | 6573 | OE2 | GLU | 822 | -60.201 | 19.724 | 50.076 | 1.00131.17 | O |
| ATOM | 6574 | C   | GLU | 822 | -58.162 | 20.120 | 55.076 | 1.00131.17 | C |
| ATOM | 6575 | O   | GLU | 822 | -56.951 | 20.214 | 54.895 | 1.00131.17 | O |
| ATOM | 6576 | N   | ASN | 823 | -58.904 | 21.162 | 55.494 | 1.0076.56  | N |
| ATOM | 6577 | CA  | ASN | 823 | -58.365 | 22.483 | 55.706 | 1.0076.56  | C |
| ATOM | 6578 | CB  | ASN | 823 | -59.490 | 23.524 | 55.883 | 1.0076.56  | C |
| ATOM | 6579 | CG  | ASN | 823 | -58.939 | 24.938 | 55.762 | 1.0076.56  | C |
| ATOM | 6580 | OD1 | ASN | 823 | -57.729 | 25.155 | 55.739 | 1.0076.56  | O |
| ATOM | 6581 | ND2 | ASN | 823 | -59.862 | 25.935 | 55.688 | 1.0076.56  | N |
| ATOM | 6582 | C   | ASN | 823 | -57.491 | 22.532 | 56.935 | 1.0076.56  | C |
| ATOM | 6583 | O   | ASN | 823 | -57.973 | 22.415 | 58.060 | 1.0076.56  | O |
| ATOM | 6584 | N   | ASP | 824 | -56.170 | 22.752 | 56.733 | 1.0058.79  | N |
| ATOM | 6585 | CA  | ASP | 824 | -55.170 | 22.820 | 57.771 | 1.0058.79  | C |
| ATOM | 6586 | CB  | ASP | 824 | -53.746 | 22.977 | 57.210 | 1.0058.79  | C |
| ATOM | 6587 | CG  | ASP | 824 | -53.359 | 21.695 | 56.491 | 1.0058.79  | C |
| ATOM | 6588 | OD1 | ASP | 824 | -54.108 | 20.690 | 56.623 | 1.0058.79  | O |
| ATOM | 6589 | OD2 | ASP | 824 | -52.305 | 21.702 | 55.799 | 1.0058.79  | O |
| ATOM | 6590 | C   | ASP | 824 | -55.410 | 24.026 | 58.626 | 1.0058.79  | C |
| ATOM | 6591 | O   | ASP | 824 | -55.123 | 24.028 | 59.822 | 1.0058.79  | O |
| ATOM | 6592 | N   | HIS | 825 | -55.897 | 25.106 | 57.997 | 1.0094.78  | N |
| ATOM | 6593 | CA  | HIS | 825 | -56.172 | 26.369 | 58.619 | 1.0094.78  | C |
| ATOM | 6594 | ND1 | HIS | 825 | -54.243 | 27.393 | 56.153 | 1.0094.78  | N |
| ATOM | 6595 | CG  | HIS | 825 | -54.988 | 28.009 | 57.135 | 1.0094.78  | C |
| ATOM | 6596 | CB  | HIS | 825 | -56.324 | 27.528 | 57.620 | 1.0094.78  | C |
| ATOM | 6597 | NE2 | HIS | 825 | -53.057 | 29.143 | 56.847 | 1.0094.78  | N |
| ATOM | 6598 | CD2 | HIS | 825 | -54.249 | 29.077 | 57.546 | 1.0094.78  | C |
| ATOM | 6599 | CE1 | HIS | 825 | -53.098 | 28.112 | 56.023 | 1.0094.78  | C |
| ATOM | 6600 | C   | HIS | 825 | -57.385 | 26.296 | 59.496 | 1.0094.78  | C |
| ATOM | 6601 | O   | HIS | 825 | -57.664 | 27.248 | 60.221 | 1.0094.78  | O |
| ATOM | 6602 | N   | MET | 826 | -58.199 | 25.225 | 59.390 | 1.0096.81  | N |
| ATOM | 6603 | CA  | MET | 826 | -59.400 | 25.137 | 60.187 | 1.0096.81  | C |
| ATOM | 6604 | CB  | MET | 826 | -60.580 | 24.537 | 59.399 | 1.0096.81  | C |

|      |      |     |     |     |         |        |        |      |        |   |
|------|------|-----|-----|-----|---------|--------|--------|------|--------|---|
| ATOM | 6605 | CG  | MET | 826 | -61.961 | 24.753 | 60.028 | 1.00 | 96.81  | C |
| ATOM | 6606 | SD  | MET | 826 | -62.742 | 26.359 | 59.666 | 1.00 | 96.81  | S |
| ATOM | 6607 | CE  | MET | 826 | -61.604 | 27.414 | 60.604 | 1.00 | 96.81  | C |
| ATOM | 6608 | C   | MET | 826 | -59.171 | 24.206 | 61.351 | 1.00 | 96.81  | C |
| ATOM | 6609 | O   | MET | 826 | -59.130 | 22.988 | 61.184 | 1.00 | 96.81  | O |
| ATOM | 6610 | N   | GLU | 827 | -59.011 | 24.761 | 62.573 | 1.00 | 104.56 | N |
| ATOM | 6611 | CA  | GLU | 827 | -58.797 | 23.947 | 63.740 | 1.00 | 104.56 | C |
| ATOM | 6612 | CB  | GLU | 827 | -58.238 | 24.740 | 64.935 | 1.00 | 104.56 | C |
| ATOM | 6613 | CG  | GLU | 827 | -59.102 | 25.913 | 65.393 | 1.00 | 104.56 | C |
| ATOM | 6614 | CD  | GLU | 827 | -58.269 | 26.697 | 66.397 | 1.00 | 104.56 | C |
| ATOM | 6615 | OE1 | GLU | 827 | -57.088 | 26.312 | 66.610 | 1.00 | 104.56 | O |
| ATOM | 6616 | OE2 | GLU | 827 | -58.797 | 27.692 | 66.961 | 1.00 | 104.56 | O |
| ATOM | 6617 | C   | GLU | 827 | -60.050 | 23.221 | 64.156 | 1.00 | 104.56 | C |
| ATOM | 6618 | O   | GLU | 827 | -59.990 | 22.041 | 64.497 | 1.00 | 104.56 | O |
| ATOM | 6619 | N   | ASP | 828 | -61.222 | 23.894 | 64.130 | 1.00 | 84.64  | N |
| ATOM | 6620 | CA  | ASP | 828 | -62.443 | 23.267 | 64.572 | 1.00 | 84.64  | C |
| ATOM | 6621 | CB  | ASP | 828 | -63.540 | 24.268 | 64.983 | 1.00 | 84.64  | C |
| ATOM | 6622 | CG  | ASP | 828 | -64.697 | 23.498 | 65.607 | 1.00 | 84.64  | C |
| ATOM | 6623 | OD1 | ASP | 828 | -64.615 | 22.242 | 65.662 | 1.00 | 84.64  | O |
| ATOM | 6624 | OD2 | ASP | 828 | -65.680 | 24.155 | 66.041 | 1.00 | 84.64  | O |
| ATOM | 6625 | C   | ASP | 828 | -62.988 | 22.441 | 63.446 | 1.00 | 84.64  | C |
| ATOM | 6626 | O   | ASP | 828 | -63.373 | 22.957 | 62.401 | 1.00 | 84.64  | O |
| ATOM | 6627 | N   | LYS | 829 | -63.000 | 21.113 | 63.659 | 1.00 | 148.15 | N |
| ATOM | 6628 | CA  | LYS | 829 | -63.417 | 20.092 | 62.738 | 1.00 | 148.15 | C |
| ATOM | 6629 | CB  | LYS | 829 | -62.864 | 18.706 | 63.096 | 1.00 | 148.15 | C |
| ATOM | 6630 | CG  | LYS | 829 | -61.346 | 18.672 | 62.926 | 1.00 | 148.15 | C |
| ATOM | 6631 | CD  | LYS | 829 | -60.910 | 19.134 | 61.532 | 1.00 | 148.15 | C |
| ATOM | 6632 | CE  | LYS | 829 | -59.396 | 19.219 | 61.340 | 1.00 | 148.15 | C |
| ATOM | 6633 | NZ  | LYS | 829 | -59.093 | 19.715 | 59.978 | 1.00 | 148.15 | N |
| ATOM | 6634 | C   | LYS | 829 | -64.908 | 20.004 | 62.582 | 1.00 | 148.15 | C |
| ATOM | 6635 | O   | LYS | 829 | -65.381 | 19.324 | 61.677 | 1.00 | 148.15 | O |
| ATOM | 6636 | N   | THR | 830 | -65.690 | 20.616 | 63.490 | 1.00 | 152.63 | N |
| ATOM | 6637 | CA  | THR | 830 | -67.126 | 20.484 | 63.483 | 1.00 | 152.63 | C |
| ATOM | 6638 | CB  | THR | 830 | -67.775 | 21.425 | 64.462 | 1.00 | 152.63 | C |
| ATOM | 6639 | OG1 | THR | 830 | -69.145 | 21.111 | 64.613 | 1.00 | 152.63 | O |
| ATOM | 6640 | CG2 | THR | 830 | -67.622 | 22.876 | 63.977 | 1.00 | 152.63 | C |
| ATOM | 6641 | C   | THR | 830 | -67.696 | 20.716 | 62.104 | 1.00 | 152.63 | C |
| ATOM | 6642 | O   | THR | 830 | -67.502 | 21.756 | 61.478 | 1.00 | 152.63 | O |
| ATOM | 6643 | N   | PRO | 831 | -68.404 | 19.723 | 61.619 | 1.00 | 77.33  | N |
| ATOM | 6644 | CA  | PRO | 831 | -68.969 | 19.791 | 60.291 | 1.00 | 77.33  | C |
| ATOM | 6645 | CD  | PRO | 831 | -68.046 | 18.358 | 61.976 | 1.00 | 77.33  | C |
| ATOM | 6646 | CB  | PRO | 831 | -69.291 | 18.350 | 59.895 | 1.00 | 77.33  | C |
| ATOM | 6647 | CG  | PRO | 831 | -68.298 | 17.513 | 60.716 | 1.00 | 77.33  | C |
| ATOM | 6648 | C   | PRO | 831 | -70.165 | 20.688 | 60.184 | 1.00 | 77.33  | C |
| ATOM | 6649 | O   | PRO | 831 | -70.840 | 20.907 | 61.189 | 1.00 | 77.33  | O |
| ATOM | 6650 | N   | VAL | 832 | -70.435 | 21.222 | 58.972 | 1.00 | 139.58 | N |
| ATOM | 6651 | CA  | VAL | 832 | -71.603 | 22.026 | 58.748 | 1.00 | 139.58 | C |
| ATOM | 6652 | CB  | VAL | 832 | -71.424 | 23.163 | 57.785 | 1.00 | 139.58 | C |
| ATOM | 6653 | CG1 | VAL | 832 | -70.661 | 24.292 | 58.477 | 1.00 | 139.58 | C |
| ATOM | 6654 | CG2 | VAL | 832 | -70.690 | 22.634 | 56.548 | 1.00 | 139.58 | C |
| ATOM | 6655 | C   | VAL | 832 | -72.671 | 21.147 | 58.201 | 1.00 | 139.58 | C |
| ATOM | 6656 | O   | VAL | 832 | -72.484 | 20.437 | 57.213 | 1.00 | 139.58 | O |
| ATOM | 6657 | N   | THR | 833 | -73.813 | 21.150 | 58.909 | 1.00 | 83.86  | N |
| ATOM | 6658 | CA  | THR | 833 | -74.967 | 20.365 | 58.603 | 1.00 | 83.86  | C |
| ATOM | 6659 | CB  | THR | 833 | -75.888 | 20.226 | 59.773 | 1.00 | 83.86  | C |
| ATOM | 6660 | OG1 | THR | 833 | -75.189 | 19.690 | 60.887 | 1.00 | 83.86  | O |
| ATOM | 6661 | CG2 | THR | 833 | -77.006 | 19.259 | 59.370 | 1.00 | 83.86  | C |
| ATOM | 6662 | C   | THR | 833 | -75.766 | 20.927 | 57.463 | 1.00 | 83.86  | C |
| ATOM | 6663 | O   | THR | 833 | -76.400 | 20.165 | 56.736 | 1.00 | 83.86  | O |
| ATOM | 6664 | N   | LYS | 834 | -75.818 | 22.268 | 57.295 | 1.00 | 122.40 | N |
| ATOM | 6665 | CA  | LYS | 834 | -76.682 | 22.762 | 56.253 | 1.00 | 122.40 | C |
| ATOM | 6666 | CB  | LYS | 834 | -77.996 | 23.384 | 56.756 | 1.00 | 122.40 | C |
| ATOM | 6667 | CG  | LYS | 834 | -78.735 | 22.554 | 57.800 | 1.00 | 122.40 | C |
| ATOM | 6668 | CD  | LYS | 834 | -78.021 | 22.604 | 59.150 | 1.00 | 122.40 | C |
| ATOM | 6669 | CE  | LYS | 834 | -78.834 | 22.066 | 60.324 | 1.00 | 122.40 | C |
| ATOM | 6670 | NZ  | LYS | 834 | -78.029 | 22.184 | 61.559 | 1.00 | 122.40 | N |

|      |      |     |     |     |         |        |        |            |   |
|------|------|-----|-----|-----|---------|--------|--------|------------|---|
| ATOM | 6671 | C   | LYS | 834 | -76.009 | 23.874 | 55.508 | 1.00122.40 | C |
| ATOM | 6672 | O   | LYS | 834 | -75.057 | 24.490 | 55.982 | 1.00122.40 | O |
| ATOM | 6673 | N   | TRP | 835 | -76.533 | 24.159 | 54.299 | 1.00100.03 | N |
| ATOM | 6674 | CA  | TRP | 835 | -76.048 | 25.199 | 53.441 | 1.00100.03 | C |
| ATOM | 6675 | CB  | TRP | 835 | -76.652 | 25.145 | 52.032 | 1.00100.03 | C |
| ATOM | 6676 | CG  | TRP | 835 | -76.043 | 24.040 | 51.205 | 1.00100.03 | C |
| ATOM | 6677 | CD2 | TRP | 835 | -74.836 | 24.211 | 50.451 | 1.00100.03 | C |
| ATOM | 6678 | CD1 | TRP | 835 | -76.435 | 22.745 | 51.022 | 1.00100.03 | C |
| ATOM | 6679 | NE1 | TRP | 835 | -75.544 | 22.099 | 50.198 | 1.00100.03 | N |
| ATOM | 6680 | CE2 | TRP | 835 | -74.554 | 22.991 | 49.840 | 1.00100.03 | C |
| ATOM | 6681 | CE3 | TRP | 835 | -74.027 | 25.299 | 50.287 | 1.00100.03 | C |
| ATOM | 6682 | CZ2 | TRP | 835 | -73.451 | 22.838 | 49.049 | 1.00100.03 | C |
| ATOM | 6683 | CZ3 | TRP | 835 | -72.918 | 25.144 | 49.487 | 1.00100.03 | C |
| ATOM | 6684 | CH2 | TRP | 835 | -72.636 | 23.937 | 48.882 | 1.00100.03 | C |
| ATOM | 6685 | C   | TRP | 835 | -76.311 | 26.535 | 54.058 | 1.00100.03 | C |
| ATOM | 6686 | O   | TRP | 835 | -75.547 | 27.477 | 53.858 | 1.00100.03 | O |
| ATOM | 6687 | N   | THR | 836 | -77.394 | 26.656 | 54.841 | 1.00224.97 | N |
| ATOM | 6688 | CA  | THR | 836 | -77.741 | 27.914 | 55.439 | 0.88224.97 | C |
| ATOM | 6689 | CB  | THR | 836 | -78.959 | 27.824 | 56.312 | 0.88224.97 | C |
| ATOM | 6690 | OG1 | THR | 836 | -78.733 | 26.917 | 57.381 | 1.00224.97 | O |
| ATOM | 6691 | CG2 | THR | 836 | -80.144 | 27.350 | 55.454 | 1.00224.97 | C |
| ATOM | 6692 | C   | THR | 836 | -76.586 | 28.351 | 56.284 | 1.00224.97 | C |
| ATOM | 6693 | O   | THR | 836 | -76.336 | 29.545 | 56.441 | 1.00224.97 | O |
| ATOM | 6694 | N   | ASP | 837 | -75.877 | 27.378 | 56.877 | 1.0077.94  | N |
| ATOM | 6695 | CA  | ASP | 837 | -74.733 | 27.597 | 57.713 | 1.0077.94  | C |
| ATOM | 6696 | CB  | ASP | 837 | -74.286 | 26.326 | 58.458 | 1.0077.94  | C |
| ATOM | 6697 | CG  | ASP | 837 | -75.311 | 26.038 | 59.548 | 1.0077.94  | C |
| ATOM | 6698 | OD1 | ASP | 837 | -76.054 | 26.981 | 59.929 | 1.0077.94  | O |
| ATOM | 6699 | OD2 | ASP | 837 | -75.361 | 24.871 | 60.019 | 1.0077.94  | O |
| ATOM | 6700 | C   | ASP | 837 | -73.566 | 28.106 | 56.911 | 1.0077.94  | C |
| ATOM | 6701 | O   | ASP | 837 | -72.652 | 28.690 | 57.490 | 1.0077.94  | O |
| ATOM | 6702 | N   | ILE | 838 | -73.516 | 27.874 | 55.579 | 1.00172.19 | N |
| ATOM | 6703 | CA  | ILE | 838 | -72.340 | 28.314 | 54.872 | 1.00172.19 | C |
| ATOM | 6704 | CB  | ILE | 838 | -71.982 | 27.475 | 53.666 | 1.00172.19 | C |
| ATOM | 6705 | CG1 | ILE | 838 | -72.940 | 27.655 | 52.481 | 1.00172.19 | C |
| ATOM | 6706 | CG2 | ILE | 838 | -71.879 | 26.020 | 54.153 | 1.00172.19 | C |
| ATOM | 6707 | CD1 | ILE | 838 | -72.559 | 28.851 | 51.609 | 1.00172.19 | C |
| ATOM | 6708 | C   | ILE | 838 | -72.518 | 29.758 | 54.480 | 1.00172.19 | C |
| ATOM | 6709 | O   | ILE | 838 | -73.482 | 30.159 | 53.829 | 1.00172.19 | O |
| ATOM | 6710 | N   | PRO | 839 | -71.553 | 30.537 | 54.905 | 1.00109.14 | N |
| ATOM | 6711 | CA  | PRO | 839 | -71.532 | 31.980 | 54.806 | 1.00109.14 | C |
| ATOM | 6712 | CD  | PRO | 839 | -70.254 | 29.991 | 55.271 | 1.00109.14 | C |
| ATOM | 6713 | CB  | PRO | 839 | -70.261 | 32.397 | 55.542 | 1.00109.14 | C |
| ATOM | 6714 | CG  | PRO | 839 | -69.310 | 31.205 | 55.318 | 1.00109.14 | C |
| ATOM | 6715 | C   | PRO | 839 | -71.515 | 32.553 | 53.417 | 1.00109.14 | C |
| ATOM | 6716 | O   | PRO | 839 | -71.151 | 31.860 | 52.468 | 1.00109.14 | O |
| ATOM | 6717 | N   | TYR | 840 | -71.902 | 33.843 | 53.307 | 1.00174.95 | N |
| ATOM | 6718 | CA  | TYR | 840 | -71.890 | 34.586 | 52.075 | 1.00174.95 | C |
| ATOM | 6719 | CB  | TYR | 840 | -73.221 | 35.265 | 51.698 | 1.00174.95 | C |
| ATOM | 6720 | CG  | TYR | 840 | -74.343 | 34.354 | 51.309 | 1.00174.95 | C |
| ATOM | 6721 | CD1 | TYR | 840 | -74.503 | 33.963 | 50.000 | 1.00174.95 | C |
| ATOM | 6722 | CD2 | TYR | 840 | -75.260 | 33.913 | 52.238 | 1.00174.95 | C |
| ATOM | 6723 | CE1 | TYR | 840 | -75.548 | 33.151 | 49.623 | 1.00174.95 | C |
| ATOM | 6724 | CE2 | TYR | 840 | -76.307 | 33.098 | 51.866 | 1.00174.95 | C |
| ATOM | 6725 | CZ  | TYR | 840 | -76.456 | 32.716 | 50.557 | 1.00174.95 | C |
| ATOM | 6726 | OH  | TYR | 840 | -77.535 | 31.886 | 50.185 | 1.00174.95 | O |
| ATOM | 6727 | C   | TYR | 840 | -70.970 | 35.749 | 52.320 | 1.00174.95 | C |
| ATOM | 6728 | O   | TYR | 840 | -70.566 | 35.995 | 53.455 | 1.00174.95 | O |
| ATOM | 6729 | N   | LEU | 841 | -70.573 | 36.475 | 51.251 | 1.00152.78 | N |
| ATOM | 6730 | CA  | LEU | 841 | -69.759 | 37.642 | 51.451 | 1.00152.78 | C |
| ATOM | 6731 | CB  | LEU | 841 | -69.083 | 38.258 | 50.213 | 1.00152.78 | C |
| ATOM | 6732 | CG  | LEU | 841 | -68.075 | 37.362 | 49.492 | 1.00152.78 | C |
| ATOM | 6733 | CD1 | LEU | 841 | -68.813 | 36.314 | 48.659 | 1.00152.78 | C |
| ATOM | 6734 | CD2 | LEU | 841 | -67.053 | 38.183 | 48.693 | 1.00152.78 | C |
| ATOM | 6735 | C   | LEU | 841 | -70.675 | 38.719 | 51.912 | 1.00152.78 | C |
| ATOM | 6736 | O   | LEU | 841 | -71.896 | 38.570 | 51.876 | 1.00152.78 | O |

|      |      |     |     |     |         |        |        |            |       |   |
|------|------|-----|-----|-----|---------|--------|--------|------------|-------|---|
| ATOM | 6737 | N   | GLY | 842 | -70.098 | 39.833 | 52.394 | 1.00       | 61.27 | N |
| ATOM | 6738 | CA  | GLY | 842 | -70.933 | 40.928 | 52.774 | 1.00       | 61.27 | C |
| ATOM | 6739 | C   | GLY | 842 | -71.526 | 41.427 | 51.497 | 1.00       | 61.27 | C |
| ATOM | 6740 | O   | GLY | 842 | -70.931 | 41.281 | 50.432 | 1.00       | 61.27 | O |
| ATOM | 6741 | N   | LYS | 843 | -72.713 | 42.054 | 51.573 | 1.00200.97 |       | N |
| ATOM | 6742 | CA  | LYS | 843 | -73.353 | 42.499 | 50.369 | 1.00200.97 |       | C |
| ATOM | 6743 | CB  | LYS | 843 | -74.718 | 43.175 | 50.565 | 1.00200.97 |       | C |
| ATOM | 6744 | CG  | LYS | 843 | -75.882 | 42.196 | 50.681 | 1.00200.97 |       | C |
| ATOM | 6745 | CD  | LYS | 843 | -77.219 | 42.888 | 50.944 | 1.00200.97 |       | C |
| ATOM | 6746 | CE  | LYS | 843 | -78.426 | 41.966 | 50.779 | 1.00200.97 |       | C |
| ATOM | 6747 | NZ  | LYS | 843 | -79.674 | 42.747 | 50.911 | 1.00200.97 |       | N |
| ATOM | 6748 | C   | LYS | 843 | -72.484 | 43.491 | 49.674 | 1.00200.97 |       | C |
| ATOM | 6749 | O   | LYS | 843 | -72.458 | 43.541 | 48.446 | 1.00200.97 |       | O |
| ATOM | 6750 | N   | ARG | 844 | -71.763 | 44.328 | 50.437 | 1.00281.60 |       | N |
| ATOM | 6751 | CA  | ARG | 844 | -70.953 | 45.333 | 49.815 | 0.88281.60 |       | C |
| ATOM | 6752 | CB  | ARG | 844 | -70.189 | 46.187 | 50.838 | 0.88281.60 |       | C |
| ATOM | 6753 | CG  | ARG | 844 | -71.107 | 46.858 | 51.855 | 0.83281.60 |       | C |
| ATOM | 6754 | CD  | ARG | 844 | -71.822 | 48.102 | 51.327 | 0.83281.60 |       | C |
| ATOM | 6755 | NE  | ARG | 844 | -70.818 | 49.197 | 51.246 | 0.83281.60 |       | N |
| ATOM | 6756 | CZ  | ARG | 844 | -71.186 | 50.466 | 51.588 | 0.83281.60 |       | C |
| ATOM | 6757 | NH1 | ARG | 844 | -72.465 | 50.712 | 51.999 | 0.83281.60 |       | N |
| ATOM | 6758 | NH2 | ARG | 844 | -70.280 | 51.484 | 51.531 | 0.83281.60 |       | N |
| ATOM | 6759 | C   | ARG | 844 | -69.916 | 44.659 | 48.973 | 1.00281.60 |       | C |
| ATOM | 6760 | O   | ARG | 844 | -69.687 | 45.050 | 47.830 | 1.00281.60 |       | O |
| ATOM | 6761 | N   | GLU | 845 | -69.272 | 43.613 | 49.525 | 1.00116.34 |       | N |
| ATOM | 6762 | CA  | GLU | 845 | -68.208 | 42.916 | 48.860 | 1.00116.34 |       | C |
| ATOM | 6763 | CB  | GLU | 845 | -67.600 | 41.801 | 49.734 | 1.00116.34 |       | C |
| ATOM | 6764 | CG  | GLU | 845 | -67.005 | 42.270 | 51.066 | 1.00116.34 |       | C |
| ATOM | 6765 | CD  | GLU | 845 | -65.644 | 42.909 | 50.827 | 1.00116.34 |       | C |
| ATOM | 6766 | OE1 | GLU | 845 | -65.472 | 43.578 | 49.774 | 1.00116.34 |       | O |
| ATOM | 6767 | OE2 | GLU | 845 | -64.757 | 42.742 | 51.707 | 1.00116.34 |       | O |
| ATOM | 6768 | C   | GLU | 845 | -68.756 | 42.232 | 47.647 | 1.00116.34 |       | C |
| ATOM | 6769 | O   | GLU | 845 | -68.124 | 42.205 | 46.593 | 1.00116.34 |       | O |
| ATOM | 6770 | N   | ASP | 846 | -69.964 | 41.659 | 47.781 | 1.00119.13 |       | N |
| ATOM | 6771 | CA  | ASP | 846 | -70.577 | 40.900 | 46.731 | 1.00119.13 |       | C |
| ATOM | 6772 | CB  | ASP | 846 | -71.934 | 40.329 | 47.185 | 1.00119.13 |       | C |
| ATOM | 6773 | CG  | ASP | 846 | -72.315 | 39.151 | 46.304 | 1.00119.13 |       | C |
| ATOM | 6774 | OD1 | ASP | 846 | -71.785 | 39.061 | 45.165 | 1.00119.13 |       | O |
| ATOM | 6775 | OD2 | ASP | 846 | -73.137 | 38.317 | 46.767 | 1.00119.13 |       | O |
| ATOM | 6776 | C   | ASP | 846 | -70.790 | 41.805 | 45.551 | 1.00119.13 |       | C |
| ATOM | 6777 | O   | ASP | 846 | -70.520 | 41.427 | 44.412 | 1.00119.13 |       | O |
| ATOM | 6778 | N   | LEU | 847 | -71.265 | 43.039 | 45.805 | 1.00160.81 |       | N |
| ATOM | 6779 | CA  | LEU | 847 | -71.522 | 43.996 | 44.763 | 1.00160.81 |       | C |
| ATOM | 6780 | CB  | LEU | 847 | -72.138 | 45.310 | 45.272 | 1.00160.81 |       | C |
| ATOM | 6781 | CG  | LEU | 847 | -72.255 | 46.378 | 44.166 | 1.00160.81 |       | C |
| ATOM | 6782 | CD1 | LEU | 847 | -73.199 | 45.926 | 43.040 | 1.00160.81 |       | C |
| ATOM | 6783 | CD2 | LEU | 847 | -72.626 | 47.750 | 44.750 | 1.00160.81 |       | C |
| ATOM | 6784 | C   | LEU | 847 | -70.237 | 44.372 | 44.090 | 1.00160.81 |       | C |
| ATOM | 6785 | O   | LEU | 847 | -70.199 | 44.539 | 42.872 | 1.00160.81 |       | O |
| ATOM | 6786 | N   | TRP | 848 | -69.145 | 44.520 | 44.866 | 1.00199.75 |       | N |
| ATOM | 6787 | CA  | TRP | 848 | -67.889 | 44.928 | 44.298 | 1.00199.75 |       | C |
| ATOM | 6788 | CB  | TRP | 848 | -66.730 | 45.007 | 45.310 | 1.00199.75 |       | C |
| ATOM | 6789 | CG  | TRP | 848 | -66.784 | 46.141 | 46.306 | 1.00199.75 |       | C |
| ATOM | 6790 | CD2 | TRP | 848 | -66.380 | 47.486 | 46.012 | 1.00199.75 |       | C |
| ATOM | 6791 | CD1 | TRP | 848 | -67.181 | 46.134 | 47.609 | 1.00199.75 |       | C |
| ATOM | 6792 | NE1 | TRP | 848 | -67.048 | 47.391 | 48.148 | 1.00199.75 |       | N |
| ATOM | 6793 | CE2 | TRP | 848 | -66.554 | 48.234 | 47.176 | 1.00199.75 |       | C |
| ATOM | 6794 | CE3 | TRP | 848 | -65.898 | 48.053 | 44.868 | 1.00199.75 |       | C |
| ATOM | 6795 | CZ2 | TRP | 848 | -66.249 | 49.565 | 47.212 | 1.00199.75 |       | C |
| ATOM | 6796 | CZ3 | TRP | 848 | -65.595 | 49.394 | 44.908 | 1.00199.75 |       | C |
| ATOM | 6797 | CH2 | TRP | 848 | -65.765 | 50.137 | 46.057 | 1.00199.75 |       | C |
| ATOM | 6798 | C   | TRP | 848 | -67.468 | 43.892 | 43.302 | 1.00199.75 |       | C |
| ATOM | 6799 | O   | TRP | 848 | -66.949 | 44.233 | 42.240 | 1.00199.75 |       | O |
| ATOM | 6800 | N   | CYS | 849 | -67.664 | 42.601 | 43.643 | 1.00131.55 |       | N |
| ATOM | 6801 | CA  | CYS | 849 | -67.302 | 41.486 | 42.802 | 1.00131.55 |       | C |
| ATOM | 6802 | CB  | CYS | 849 | -67.207 | 40.051 | 43.474 | 1.00131.55 |       | C |

|      |      |     |     |     |         |        |        |            |   |
|------|------|-----|-----|-----|---------|--------|--------|------------|---|
| ATOM | 6803 | SG  | CYS | 849 | -65.647 | 39.554 | 44.367 | 1.00131.55 | S |
| ATOM | 6804 | C   | CYS | 849 | -68.208 | 41.424 | 41.594 | 1.00131.55 | C |
| ATOM | 6805 | O   | CYS | 849 | -67.947 | 40.637 | 40.691 | 1.00131.55 | O |
| ATOM | 6806 | N   | GLY | 850 | -69.322 | 42.194 | 41.539 | 1.00 55.25 | N |
| ATOM | 6807 | CA  | GLY | 850 | -70.129 | 42.167 | 40.338 | 1.00 55.25 | C |
| ATOM | 6808 | C   | GLY | 850 | -71.502 | 41.596 | 40.564 | 1.00 55.25 | C |
| ATOM | 6809 | O   | GLY | 850 | -72.189 | 41.247 | 39.606 | 1.00 55.25 | O |
| ATOM | 6810 | N   | SER | 851 | -71.952 | 41.483 | 41.827 | 1.00165.35 | N |
| ATOM | 6811 | CA  | SER | 851 | -73.254 | 40.936 | 42.112 | 1.00165.35 | C |
| ATOM | 6812 | CB  | SER | 851 | -73.497 | 40.704 | 43.612 | 1.00165.35 | C |
| ATOM | 6813 | OG  | SER | 851 | -74.793 | 40.162 | 43.818 | 1.00165.35 | O |
| ATOM | 6814 | C   | SER | 851 | -74.359 | 41.838 | 41.624 | 1.00165.35 | C |
| ATOM | 6815 | O   | SER | 851 | -74.253 | 43.062 | 41.639 | 1.00165.35 | O |
| ATOM | 6816 | N   | LEU | 852 | -75.434 | 41.200 | 41.107 | 1.00359.53 | N |
| ATOM | 6817 | CA  | LEU | 852 | -76.661 | 41.782 | 40.624 | 1.00359.53 | C |
| ATOM | 6818 | CB  | LEU | 852 | -77.427 | 40.911 | 39.606 | 1.00359.53 | C |
| ATOM | 6819 | CG  | LEU | 852 | -76.730 | 40.768 | 38.237 | 1.00359.53 | C |
| ATOM | 6820 | CD1 | LEU | 852 | -76.440 | 42.139 | 37.610 | 1.00359.53 | C |
| ATOM | 6821 | CD2 | LEU | 852 | -75.497 | 39.858 | 38.296 | 1.00359.53 | C |
| ATOM | 6822 | C   | LEU | 852 | -77.611 | 42.145 | 41.727 | 1.00359.53 | C |
| ATOM | 6823 | O   | LEU | 852 | -78.596 | 42.842 | 41.481 | 1.00359.53 | O |
| ATOM | 6824 | N   | ILE | 853 | -77.409 | 41.585 | 42.937 | 1.00376.96 | N |
| ATOM | 6825 | CA  | ILE | 853 | -78.295 | 41.800 | 44.053 | 1.00376.96 | C |
| ATOM | 6826 | CB  | ILE | 853 | -77.700 | 41.457 | 45.380 | 1.00376.96 | C |
| ATOM | 6827 | CG1 | ILE | 853 | -77.353 | 39.981 | 45.520 | 1.00376.96 | C |
| ATOM | 6828 | CG2 | ILE | 853 | -78.684 | 41.922 | 46.446 | 1.00376.96 | C |
| ATOM | 6829 | CD1 | ILE | 853 | -76.644 | 39.729 | 46.844 | 1.00376.96 | C |
| ATOM | 6830 | C   | ILE | 853 | -78.654 | 43.245 | 44.184 | 1.00376.96 | C |
| ATOM | 6831 | O   | ILE | 853 | -77.809 | 44.129 | 44.056 | 1.00376.96 | O |
| ATOM | 6832 | N   | GLY | 854 | -79.952 | 43.504 | 44.447 | 1.00380.69 | N |
| ATOM | 6833 | CA  | GLY | 854 | -80.427 | 44.838 | 44.677 | 1.00380.69 | C |
| ATOM | 6834 | C   | GLY | 854 | -81.050 | 45.374 | 43.429 | 1.00380.69 | C |
| ATOM | 6835 | O   | GLY | 854 | -81.763 | 46.375 | 43.477 | 1.00380.69 | O |
| ATOM | 6836 | N   | HIS | 855 | -80.788 | 44.729 | 42.277 | 1.00363.79 | N |
| ATOM | 6837 | CA  | HIS | 855 | -81.354 | 45.174 | 41.034 | 1.00363.79 | C |
| ATOM | 6838 | ND1 | HIS | 855 | -78.092 | 45.300 | 40.437 | 1.00363.79 | N |
| ATOM | 6839 | CG  | HIS | 855 | -79.224 | 45.578 | 39.705 | 1.00363.79 | C |
| ATOM | 6840 | CB  | HIS | 855 | -80.506 | 44.805 | 39.801 | 1.00363.79 | C |
| ATOM | 6841 | NE2 | HIS | 855 | -77.603 | 47.050 | 39.156 | 1.00363.79 | N |
| ATOM | 6842 | CD2 | HIS | 855 | -78.908 | 46.650 | 38.927 | 1.00363.79 | C |
| ATOM | 6843 | CE1 | HIS | 855 | -77.154 | 46.210 | 40.071 | 1.00363.79 | C |
| ATOM | 6844 | C   | HIS | 855 | -82.696 | 44.534 | 40.866 | 1.00363.79 | C |
| ATOM | 6845 | O   | HIS | 855 | -82.955 | 43.459 | 41.404 | 1.00363.79 | O |
| ATOM | 6846 | N   | ARG | 856 | -83.603 | 45.217 | 40.137 | 1.00284.59 | N |
| ATOM | 6847 | CA  | ARG | 856 | -84.919 | 44.704 | 39.876 | 1.00284.59 | C |
| ATOM | 6848 | CB  | ARG | 856 | -85.863 | 45.730 | 39.226 | 1.00284.59 | C |
| ATOM | 6849 | CG  | ARG | 856 | -86.535 | 46.654 | 40.244 | 1.00284.59 | C |
| ATOM | 6850 | CD  | ARG | 856 | -85.563 | 47.521 | 41.044 | 1.00284.59 | C |
| ATOM | 6851 | NE  | ARG | 856 | -85.498 | 48.858 | 40.394 | 1.00284.59 | N |
| ATOM | 6852 | CZ  | ARG | 856 | -84.779 | 49.855 | 40.987 | 1.00284.59 | C |
| ATOM | 6853 | NH1 | ARG | 856 | -84.104 | 49.604 | 42.148 | 1.00284.59 | N |
| ATOM | 6854 | NH2 | ARG | 856 | -84.734 | 51.097 | 40.425 | 1.00284.59 | N |
| ATOM | 6855 | C   | ARG | 856 | -84.859 | 43.506 | 38.982 | 1.00284.59 | C |
| ATOM | 6856 | O   | ARG | 856 | -85.593 | 42.543 | 39.201 | 1.00284.59 | O |
| ATOM | 6857 | N   | PRO | 857 | -84.031 | 43.511 | 37.974 | 1.00112.91 | N |
| ATOM | 6858 | CA  | PRO | 857 | -83.986 | 42.374 | 37.105 | 1.00112.91 | C |
| ATOM | 6859 | CD  | PRO | 857 | -83.663 | 44.725 | 37.273 | 1.00112.91 | C |
| ATOM | 6860 | CB  | PRO | 857 | -83.135 | 42.791 | 35.899 | 1.00112.91 | C |
| ATOM | 6861 | CG  | PRO | 857 | -82.649 | 44.219 | 36.233 | 1.00112.91 | C |
| ATOM | 6862 | C   | PRO | 857 | -83.551 | 41.144 | 37.828 | 1.00112.91 | C |
| ATOM | 6863 | O   | PRO | 857 | -84.036 | 40.062 | 37.499 | 1.00112.91 | O |
| ATOM | 6864 | N   | ARG | 858 | -82.633 | 41.277 | 38.802 | 1.00235.17 | N |
| ATOM | 6865 | CA  | ARG | 858 | -82.222 | 40.133 | 39.558 | 1.00235.17 | C |
| ATOM | 6866 | CB  | ARG | 858 | -81.032 | 40.375 | 40.494 | 1.00235.17 | C |
| ATOM | 6867 | CG  | ARG | 858 | -80.606 | 39.060 | 41.140 | 1.00235.17 | C |
| ATOM | 6868 | CD  | ARG | 858 | -79.681 | 39.186 | 42.342 | 1.00235.17 | C |



|      |      |     |     |     |         |        |        |            |   |
|------|------|-----|-----|-----|---------|--------|--------|------------|---|
| ATOM | 6869 | NE  | ARG | 858 | -79.410 | 37.794 | 42.795 | 1.00235.17 | N |
| ATOM | 6870 | CZ  | ARG | 858 | -80.268 | 37.169 | 43.651 | 1.00235.17 | C |
| ATOM | 6871 | NH1 | ARG | 858 | -81.386 | 37.821 | 44.080 | 1.00235.17 | N |
| ATOM | 6872 | NH2 | ARG | 858 | -80.008 | 35.900 | 44.077 | 1.00235.17 | N |
| ATOM | 6873 | C   | ARG | 858 | -83.362 | 39.707 | 40.427 | 1.00235.17 | C |
| ATOM | 6874 | O   | ARG | 858 | -83.580 | 38.518 | 40.650 | 1.00235.17 | O |
| ATOM | 6875 | N   | THR | 859 | -84.115 | 40.686 | 40.957 | 1.00178.20 | N |
| ATOM | 6876 | CA  | THR | 859 | -85.196 | 40.388 | 41.848 | 1.00178.20 | C |
| ATOM | 6877 | CB  | THR | 859 | -85.907 | 41.620 | 42.325 | 1.00178.20 | C |
| ATOM | 6878 | OG1 | THR | 859 | -85.003 | 42.479 | 43.001 | 1.00178.20 | O |
| ATOM | 6879 | CG2 | THR | 859 | -87.046 | 41.195 | 43.268 | 1.00178.20 | C |
| ATOM | 6880 | C   | THR | 859 | -86.195 | 39.559 | 41.114 | 1.00178.20 | C |
| ATOM | 6881 | O   | THR | 859 | -86.695 | 38.564 | 41.638 | 1.00178.20 | O |
| ATOM | 6882 | N   | THR | 860 | -86.510 | 39.941 | 39.868 | 1.00149.45 | N |
| ATOM | 6883 | CA  | THR | 860 | -87.490 | 39.192 | 39.147 | 1.00149.45 | C |
| ATOM | 6884 | CB  | THR | 860 | -87.853 | 39.785 | 37.813 | 1.00149.45 | C |
| ATOM | 6885 | OG1 | THR | 860 | -88.987 | 39.115 | 37.288 | 1.00149.45 | O |
| ATOM | 6886 | CG2 | THR | 860 | -86.670 | 39.649 | 36.842 | 1.00149.45 | C |
| ATOM | 6887 | C   | THR | 860 | -86.986 | 37.802 | 38.913 | 1.00149.45 | C |
| ATOM | 6888 | O   | THR | 860 | -87.745 | 36.843 | 39.045 | 1.00149.45 | O |
| ATOM | 6889 | N   | TRP | 861 | -85.691 | 37.634 | 38.564 | 1.00315.12 | N |
| ATOM | 6890 | CA  | TRP | 861 | -85.264 | 36.304 | 38.228 | 1.00315.12 | C |
| ATOM | 6891 | CB  | TRP | 861 | -83.890 | 36.179 | 37.514 | 1.00315.12 | C |
| ATOM | 6892 | CG  | TRP | 861 | -82.607 | 36.222 | 38.317 | 1.00315.12 | C |
| ATOM | 6893 | CD2 | TRP | 861 | -81.784 | 35.070 | 38.577 | 1.00315.12 | C |
| ATOM | 6894 | CD1 | TRP | 861 | -81.938 | 37.286 | 38.837 | 1.00315.12 | C |
| ATOM | 6895 | NE1 | TRP | 861 | -80.767 | 36.870 | 39.424 | 1.00315.12 | N |
| ATOM | 6896 | CE2 | TRP | 861 | -80.654 | 35.510 | 39.263 | 1.00315.12 | C |
| ATOM | 6897 | CE3 | TRP | 861 | -81.947 | 33.755 | 38.257 | 1.00315.12 | C |
| ATOM | 6898 | CZ2 | TRP | 861 | -79.665 | 34.644 | 39.639 | 1.00315.12 | C |
| ATOM | 6899 | CZ3 | TRP | 861 | -80.954 | 32.885 | 38.651 | 1.00315.12 | C |
| ATOM | 6900 | CH2 | TRP | 861 | -79.834 | 33.316 | 39.327 | 1.00315.12 | C |
| ATOM | 6901 | C   | TRP | 861 | -85.282 | 35.419 | 39.433 | 1.00315.12 | C |
| ATOM | 6902 | O   | TRP | 861 | -85.689 | 34.262 | 39.345 | 1.00315.12 | O |
| ATOM | 6903 | N   | ALA | 862 | -84.859 | 35.934 | 40.602 | 1.0091.92  | N |
| ATOM | 6904 | CA  | ALA | 862 | -84.795 | 35.095 | 41.769 | 1.0091.92  | C |
| ATOM | 6905 | CB  | ALA | 862 | -84.239 | 35.822 | 43.006 | 1.0091.92  | C |
| ATOM | 6906 | C   | ALA | 862 | -86.163 | 34.591 | 42.123 | 1.0091.92  | C |
| ATOM | 6907 | O   | ALA | 862 | -86.328 | 33.438 | 42.521 | 1.0091.92  | O |
| ATOM | 6908 | N   | GLU | 863 | -87.181 | 35.461 | 42.022 | 1.00135.86 | N |
| ATOM | 6909 | CA  | GLU | 863 | -88.524 | 35.087 | 42.357 | 1.00135.86 | C |
| ATOM | 6910 | CB  | GLU | 863 | -89.480 | 36.288 | 42.354 | 1.00135.86 | C |
| ATOM | 6911 | CG  | GLU | 863 | -90.917 | 35.917 | 42.716 | 1.00135.86 | C |
| ATOM | 6912 | CD  | GLU | 863 | -91.768 | 37.171 | 42.587 | 1.00135.86 | C |
| ATOM | 6913 | OE1 | GLU | 863 | -91.456 | 38.174 | 43.282 | 1.00135.86 | O |
| ATOM | 6914 | OE2 | GLU | 863 | -92.739 | 37.143 | 41.785 | 1.00135.86 | O |
| ATOM | 6915 | C   | GLU | 863 | -89.076 | 34.096 | 41.374 | 1.00135.86 | C |
| ATOM | 6916 | O   | GLU | 863 | -89.785 | 33.172 | 41.768 | 1.00135.86 | O |
| ATOM | 6917 | N   | ASN | 864 | -88.785 | 34.261 | 40.065 | 1.00126.17 | N |
| ATOM | 6918 | CA  | ASN | 864 | -89.415 | 33.411 | 39.086 | 1.00126.17 | C |
| ATOM | 6919 | CB  | ASN | 864 | -89.868 | 34.215 | 37.855 | 1.00126.17 | C |
| ATOM | 6920 | CG  | ASN | 864 | -90.857 | 35.279 | 38.309 | 1.00126.17 | C |
| ATOM | 6921 | OD1 | ASN | 864 | -91.973 | 34.974 | 38.721 | 1.00126.17 | O |
| ATOM | 6922 | ND2 | ASN | 864 | -90.432 | 36.570 | 38.238 | 1.00126.17 | N |
| ATOM | 6923 | C   | ASN | 864 | -88.440 | 32.395 | 38.563 | 1.00126.17 | C |
| ATOM | 6924 | O   | ASN | 864 | -88.491 | 32.031 | 37.389 | 1.00126.17 | O |
| ATOM | 6925 | N   | ILE | 865 | -87.550 | 31.874 | 39.421 | 1.00183.10 | N |
| ATOM | 6926 | CA  | ILE | 865 | -86.571 | 30.906 | 39.006 | 1.00183.10 | C |
| ATOM | 6927 | CB  | ILE | 865 | -85.491 | 30.670 | 40.031 | 1.00183.10 | C |
| ATOM | 6928 | CG1 | ILE | 865 | -84.325 | 29.888 | 39.402 | 1.00183.10 | C |
| ATOM | 6929 | CG2 | ILE | 865 | -86.113 | 29.976 | 41.256 | 1.00183.10 | C |
| ATOM | 6930 | CD1 | ILE | 865 | -83.610 | 30.635 | 38.276 | 1.00183.10 | C |
| ATOM | 6931 | C   | ILE | 865 | -87.229 | 29.598 | 38.666 | 1.00183.10 | C |
| ATOM | 6932 | O   | ILE | 865 | -86.805 | 28.891 | 37.754 | 1.00183.10 | O |
| ATOM | 6933 | N   | LYS | 866 | -88.295 | 29.236 | 39.398 | 1.00149.25 | N |
| ATOM | 6934 | CA  | LYS | 866 | -88.929 | 27.959 | 39.239 | 1.00149.25 | C |

|      |      |     |     |     |         |        |        |            |   |
|------|------|-----|-----|-----|---------|--------|--------|------------|---|
| ATOM | 6935 | CB  | LYS | 866 | -90.156 | 27.795 | 40.152 | 1.00149.25 | C |
| ATOM | 6936 | CG  | LYS | 866 | -89.807 | 27.793 | 41.641 | 1.00149.25 | C |
| ATOM | 6937 | CD  | LYS | 866 | -88.854 | 26.663 | 42.038 | 1.00149.25 | C |
| ATOM | 6938 | CE  | LYS | 866 | -89.542 | 25.310 | 42.224 | 1.00149.25 | C |
| ATOM | 6939 | NZ  | LYS | 866 | -90.237 | 25.270 | 43.530 | 1.00149.25 | N |
| ATOM | 6940 | C   | LYS | 866 | -89.400 | 27.779 | 37.825 | 1.00149.25 | C |
| ATOM | 6941 | O   | LYS | 866 | -89.340 | 26.671 | 37.294 | 1.00149.25 | O |
| ATOM | 6942 | N   | ASP | 867 | -89.907 | 28.844 | 37.173 | 1.00101.46 | N |
| ATOM | 6943 | CA  | ASP | 867 | -90.412 | 28.660 | 35.841 | 1.00101.46 | C |
| ATOM | 6944 | CB  | ASP | 867 | -91.169 | 29.883 | 35.268 | 1.00101.46 | C |
| ATOM | 6945 | CG  | ASP | 867 | -90.256 | 31.084 | 35.046 | 1.00101.46 | C |
| ATOM | 6946 | OD1 | ASP | 867 | -89.388 | 31.023 | 34.135 | 1.00101.46 | O |
| ATOM | 6947 | OD2 | ASP | 867 | -90.440 | 32.097 | 35.771 | 1.00101.46 | O |
| ATOM | 6948 | C   | ASP | 867 | -89.300 | 28.293 | 34.905 | 1.00101.46 | C |
| ATOM | 6949 | O   | ASP | 867 | -89.472 | 27.429 | 34.047 | 1.00101.46 | O |
| ATOM | 6950 | N   | THR | 868 | -88.121 | 28.928 | 35.049 | 1.00 98.16 | N |
| ATOM | 6951 | CA  | THR | 868 | -87.037 | 28.655 | 34.147 | 1.00 98.16 | C |
| ATOM | 6952 | CB  | THR | 868 | -85.848 | 29.566 | 34.324 | 1.00 98.16 | C |
| ATOM | 6953 | OG1 | THR | 868 | -84.966 | 29.432 | 33.220 | 1.00 98.16 | O |
| ATOM | 6954 | CG2 | THR | 868 | -85.110 | 29.215 | 35.626 | 1.00 98.16 | C |
| ATOM | 6955 | C   | THR | 868 | -86.581 | 27.241 | 34.337 | 1.00 98.16 | C |
| ATOM | 6956 | O   | THR | 868 | -86.280 | 26.546 | 33.368 | 1.00 98.16 | O |
| ATOM | 6957 | N   | VAL | 869 | -86.531 | 26.773 | 35.598 | 1.00 32.72 | N |
| ATOM | 6958 | CA  | VAL | 869 | -86.079 | 25.443 | 35.895 | 1.00 32.72 | C |
| ATOM | 6959 | CB  | VAL | 869 | -86.097 | 25.141 | 37.364 | 1.00 32.72 | C |
| ATOM | 6960 | CG1 | VAL | 869 | -85.734 | 23.660 | 37.561 | 1.00 32.72 | C |
| ATOM | 6961 | CG2 | VAL | 869 | -85.146 | 26.118 | 38.076 | 1.00 32.72 | C |
| ATOM | 6962 | C   | VAL | 869 | -86.990 | 24.467 | 35.222 | 1.00 32.72 | C |
| ATOM | 6963 | O   | VAL | 869 | -86.537 | 23.477 | 34.649 | 1.00 32.72 | O |
| ATOM | 6964 | N   | ASN | 870 | -88.309 | 24.728 | 35.275 | 1.00 35.47 | N |
| ATOM | 6965 | CA  | ASN | 870 | -89.277 | 23.844 | 34.691 | 1.00 35.47 | C |
| ATOM | 6966 | CB  | ASN | 870 | -90.730 | 24.291 | 34.932 | 1.00 35.47 | C |
| ATOM | 6967 | CG  | ASN | 870 | -91.070 | 24.065 | 36.397 | 1.00 35.47 | C |
| ATOM | 6968 | OD1 | ASN | 870 | -90.518 | 23.178 | 37.046 | 1.00 35.47 | O |
| ATOM | 6969 | ND2 | ASN | 870 | -92.015 | 24.882 | 36.935 | 1.00 35.47 | N |
| ATOM | 6970 | C   | ASN | 870 | -89.074 | 23.797 | 33.210 | 1.00 35.47 | C |
| ATOM | 6971 | O   | ASN | 870 | -89.207 | 22.739 | 32.598 | 1.00 35.47 | O |
| ATOM | 6972 | N   | MET | 871 | -88.746 | 24.947 | 32.588 | 1.00 70.70 | N |
| ATOM | 6973 | CA  | MET | 871 | -88.607 | 24.973 | 31.160 | 1.00 70.70 | C |
| ATOM | 6974 | CB  | MET | 871 | -88.237 | 26.357 | 30.594 | 1.00 70.70 | C |
| ATOM | 6975 | CG  | MET | 871 | -89.342 | 27.407 | 30.723 | 1.00 70.70 | C |
| ATOM | 6976 | SD  | MET | 871 | -88.970 | 28.985 | 29.901 | 1.00 70.70 | S |
| ATOM | 6977 | CE  | MET | 871 | -87.709 | 29.511 | 31.097 | 1.00 70.70 | C |
| ATOM | 6978 | C   | MET | 871 | -87.502 | 24.050 | 30.759 | 1.00 70.70 | C |
| ATOM | 6979 | O   | MET | 871 | -87.644 | 23.290 | 29.803 | 1.00 70.70 | O |
| ATOM | 6980 | N   | VAL | 872 | -86.369 | 24.092 | 31.485 | 1.00 48.89 | N |
| ATOM | 6981 | CA  | VAL | 872 | -85.248 | 23.268 | 31.141 | 1.00 48.89 | C |
| ATOM | 6982 | CB  | VAL | 872 | -84.043 | 23.523 | 32.000 | 1.00 48.89 | C |
| ATOM | 6983 | CG1 | VAL | 872 | -82.966 | 22.483 | 31.644 | 1.00 48.89 | C |
| ATOM | 6984 | CG2 | VAL | 872 | -83.592 | 24.981 | 31.794 | 1.00 48.89 | C |
| ATOM | 6985 | C   | VAL | 872 | -85.622 | 21.829 | 31.299 | 1.00 48.89 | C |
| ATOM | 6986 | O   | VAL | 872 | -85.309 | 20.999 | 30.448 | 1.00 48.89 | O |
| ATOM | 6987 | N   | ARG | 873 | -86.327 | 21.484 | 32.389 | 1.00186.32 | N |
| ATOM | 6988 | CA  | ARG | 873 | -86.636 | 20.099 | 32.586 | 1.00186.32 | C |
| ATOM | 6989 | CB  | ARG | 873 | -87.144 | 19.742 | 34.002 | 1.00186.32 | C |
| ATOM | 6990 | CG  | ARG | 873 | -88.351 | 20.504 | 34.536 | 1.00186.32 | C |
| ATOM | 6991 | CD  | ARG | 873 | -88.659 | 20.170 | 36.003 | 1.00186.32 | C |
| ATOM | 6992 | NE  | ARG | 873 | -87.445 | 20.491 | 36.810 | 1.00186.32 | N |
| ATOM | 6993 | CZ  | ARG | 873 | -87.514 | 20.580 | 38.173 | 1.00186.32 | C |
| ATOM | 6994 | NH1 | ARG | 873 | -88.697 | 20.384 | 38.824 | 1.00186.32 | N |
| ATOM | 6995 | NH2 | ARG | 873 | -86.395 | 20.871 | 38.896 | 1.00186.32 | N |
| ATOM | 6996 | C   | ARG | 873 | -87.529 | 19.596 | 31.495 | 1.00186.32 | C |
| ATOM | 6997 | O   | ARG | 873 | -87.414 | 18.439 | 31.091 | 1.00186.32 | O |
| ATOM | 6998 | N   | ARG | 874 | -88.437 | 20.444 | 30.977 | 1.00116.51 | N |
| ATOM | 6999 | CA  | ARG | 874 | -89.310 | 20.015 | 29.920 | 1.00116.51 | C |
| ATOM | 7000 | CB  | ARG | 874 | -90.283 | 21.122 | 29.478 | 1.00116.51 | C |

|      |      |     |     |     |         |        |        |            |   |
|------|------|-----|-----|-----|---------|--------|--------|------------|---|
| ATOM | 7001 | CG  | ARG | 874 | -91.262 | 21.552 | 30.569 | 1.00116.51 | C |
| ATOM | 7002 | CD  | ARG | 874 | -92.127 | 22.747 | 30.166 | 1.00116.51 | C |
| ATOM | 7003 | NE  | ARG | 874 | -91.202 | 23.883 | 29.894 | 1.00116.51 | N |
| ATOM | 7004 | CZ  | ARG | 874 | -90.681 | 24.053 | 28.644 | 1.00116.51 | C |
| ATOM | 7005 | NH1 | ARG | 874 | -91.054 | 23.218 | 27.630 | 1.00116.51 | N |
| ATOM | 7006 | NH2 | ARG | 874 | -89.788 | 25.058 | 28.406 | 1.00116.51 | N |
| ATOM | 7007 | C   | ARG | 874 | -88.488 | 19.655 | 28.717 | 1.00116.51 | C |
| ATOM | 7008 | O   | ARG | 874 | -88.735 | 18.630 | 28.083 | 1.00116.51 | O |
| ATOM | 7009 | N   | ILE | 875 | -87.485 | 20.488 | 28.363 | 1.00102.07 | N |
| ATOM | 7010 | CA  | ILE | 875 | -86.718 | 20.217 | 27.177 | 1.00102.07 | C |
| ATOM | 7011 | CB  | ILE | 875 | -85.733 | 21.291 | 26.787 | 1.00102.07 | C |
| ATOM | 7012 | CG1 | ILE | 875 | -84.619 | 21.449 | 27.835 | 1.00102.07 | C |
| ATOM | 7013 | CG2 | ILE | 875 | -86.515 | 22.581 | 26.510 | 1.00102.07 | C |
| ATOM | 7014 | CD1 | ILE | 875 | -83.410 | 22.234 | 27.329 | 1.00102.07 | C |
| ATOM | 7015 | C   | ILE | 875 | -85.920 | 18.964 | 27.344 | 1.00102.07 | C |
| ATOM | 7016 | O   | ILE | 875 | -85.884 | 18.136 | 26.435 | 1.00102.07 | O |
| ATOM | 7017 | N   | ILE | 876 | -85.252 | 18.777 | 28.504 | 1.00204.75 | N |
| ATOM | 7018 | CA  | ILE | 876 | -84.413 | 17.616 | 28.585 | 1.00204.75 | C |
| ATOM | 7019 | CB  | ILE | 876 | -83.486 | 17.531 | 29.779 | 1.00204.75 | C |
| ATOM | 7020 | CG1 | ILE | 876 | -84.188 | 17.195 | 31.089 | 1.00204.75 | C |
| ATOM | 7021 | CG2 | ILE | 876 | -82.680 | 18.833 | 29.838 | 1.00204.75 | C |
| ATOM | 7022 | CD1 | ILE | 876 | -84.354 | 15.684 | 31.217 | 1.00204.75 | C |
| ATOM | 7023 | C   | ILE | 876 | -85.318 | 16.427 | 28.506 | 1.00204.75 | C |
| ATOM | 7024 | O   | ILE | 876 | -84.992 | 15.445 | 27.842 | 1.00204.75 | O |
| ATOM | 7025 | N   | GLY | 877 | -86.489 | 16.478 | 29.178 | 1.0056.44  | N |
| ATOM | 7026 | CA  | GLY | 877 | -87.426 | 15.406 | 28.982 | 1.0056.44  | C |
| ATOM | 7027 | C   | GLY | 877 | -87.743 | 14.721 | 30.268 | 1.0056.44  | C |
| ATOM | 7028 | O   | GLY | 877 | -87.315 | 15.135 | 31.342 | 1.0056.44  | O |
| ATOM | 7029 | N   | ASP | 878 | -88.537 | 13.633 | 30.172 | 1.0086.63  | N |
| ATOM | 7030 | CA  | ASP | 878 | -88.903 | 12.896 | 31.341 | 1.0086.63  | C |
| ATOM | 7031 | CB  | ASP | 878 | -90.052 | 11.889 | 31.115 | 1.0086.63  | C |
| ATOM | 7032 | CG  | ASP | 878 | -89.683 | 10.887 | 30.027 | 1.0086.63  | C |
| ATOM | 7033 | OD1 | ASP | 878 | -88.764 | 11.187 | 29.217 | 1.0086.63  | O |
| ATOM | 7034 | OD2 | ASP | 878 | -90.333 | 9.809  | 29.984 | 1.0086.63  | O |
| ATOM | 7035 | C   | ASP | 878 | -87.682 | 12.191 | 31.815 | 1.0086.63  | C |
| ATOM | 7036 | O   | ASP | 878 | -87.217 | 11.216 | 31.226 | 1.0086.63  | O |
| ATOM | 7037 | N   | GLU | 879 | -87.117 | 12.711 | 32.915 | 1.00160.32 | N |
| ATOM | 7038 | CA  | GLU | 879 | -85.913 | 12.178 | 33.457 | 1.00160.32 | C |
| ATOM | 7039 | CB  | GLU | 879 | -84.680 | 13.055 | 33.179 | 1.00160.32 | C |
| ATOM | 7040 | CG  | GLU | 879 | -83.358 | 12.426 | 33.621 | 1.00160.32 | C |
| ATOM | 7041 | CD  | GLU | 879 | -83.056 | 11.241 | 32.716 | 1.00160.32 | C |
| ATOM | 7042 | OE1 | GLU | 879 | -82.890 | 11.458 | 31.488 | 1.00160.32 | O |
| ATOM | 7043 | OE2 | GLU | 879 | -82.984 | 10.099 | 33.242 | 1.00160.32 | O |
| ATOM | 7044 | C   | GLU | 879 | -86.123 | 12.100 | 34.920 | 1.00160.32 | C |
| ATOM | 7045 | O   | GLU | 879 | -87.159 | 12.518 | 35.434 | 1.00160.32 | O |
| ATOM | 7046 | N   | GLU | 880 | -85.127 | 11.566 | 35.642 | 1.00125.54 | N |
| ATOM | 7047 | CA  | GLU | 880 | -85.392 | 11.310 | 37.011 | 1.00125.54 | C |
| ATOM | 7048 | CB  | GLU | 880 | -85.127 | 9.856  | 37.425 | 1.00125.54 | C |
| ATOM | 7049 | CG  | GLU | 880 | -86.069 | 8.834  | 36.791 | 1.00125.54 | C |
| ATOM | 7050 | CD  | GLU | 880 | -85.616 | 7.461  | 37.269 | 1.00125.54 | C |
| ATOM | 7051 | OE1 | GLU | 880 | -84.632 | 7.409  | 38.056 | 1.00125.54 | O |
| ATOM | 7052 | OE2 | GLU | 880 | -86.242 | 6.450  | 36.854 | 1.00125.54 | O |
| ATOM | 7053 | C   | GLU | 880 | -84.556 | 12.114 | 37.912 | 1.00125.54 | C |
| ATOM | 7054 | O   | GLU | 880 | -83.720 | 12.937 | 37.522 | 1.00125.54 | O |
| ATOM | 7055 | N   | LYS | 881 | -84.867 | 11.861 | 39.191 | 1.00306.94 | N |
| ATOM | 7056 | CA  | LYS | 881 | -84.242 | 12.453 | 40.309 | 1.00306.94 | C |
| ATOM | 7057 | CB  | LYS | 881 | -82.840 | 11.913 | 40.628 | 1.00306.94 | C |
| ATOM | 7058 | CG  | LYS | 881 | -82.385 | 12.305 | 42.034 | 1.00306.94 | C |
| ATOM | 7059 | CD  | LYS | 881 | -83.271 | 11.737 | 43.147 | 1.00306.94 | C |
| ATOM | 7060 | CE  | LYS | 881 | -83.387 | 10.212 | 43.122 | 1.00306.94 | C |
| ATOM | 7061 | NZ  | LYS | 881 | -82.082 | 9.601  | 43.454 | 1.00306.94 | N |
| ATOM | 7062 | C   | LYS | 881 | -84.197 | 13.897 | 40.034 | 1.00306.94 | C |
| ATOM | 7063 | O   | LYS | 881 | -83.171 | 14.546 | 40.204 | 1.00306.94 | O |
| ATOM | 7064 | N   | TYR | 882 | -85.321 | 14.463 | 39.572 | 1.00167.45 | N |
| ATOM | 7065 | CA  | TYR | 882 | -85.185 | 15.869 | 39.506 | 1.00167.45 | C |
| ATOM | 7066 | CB  | TYR | 882 | -86.351 | 16.644 | 38.869 | 1.00167.45 | C |

|      |      |     |     |     |         |        |        |            |   |
|------|------|-----|-----|-----|---------|--------|--------|------------|---|
| ATOM | 7067 | CG  | TYR | 882 | -86.300 | 16.540 | 37.394 | 1.00167.45 | C |
| ATOM | 7068 | CD1 | TYR | 882 | -85.544 | 17.448 | 36.694 | 1.00167.45 | C |
| ATOM | 7069 | CD2 | TYR | 882 | -86.986 | 15.561 | 36.719 | 1.00167.45 | C |
| ATOM | 7070 | CE1 | TYR | 882 | -85.475 | 17.390 | 35.327 | 1.00167.45 | C |
| ATOM | 7071 | CE2 | TYR | 882 | -86.922 | 15.498 | 35.349 | 1.00167.45 | C |
| ATOM | 7072 | CZ  | TYR | 882 | -86.168 | 16.414 | 34.661 | 1.00167.45 | C |
| ATOM | 7073 | OH  | TYR | 882 | -86.103 | 16.357 | 33.259 | 1.00167.45 | O |
| ATOM | 7074 | C   | TYR | 882 | -85.289 | 16.206 | 40.938 | 1.00167.45 | C |
| ATOM | 7075 | O   | TYR | 882 | -86.295 | 15.904 | 41.575 | 1.00167.45 | O |
| ATOM | 7076 | N   | MET | 883 | -84.210 | 16.760 | 41.509 | 1.00114.18 | N |
| ATOM | 7077 | CA  | MET | 883 | -84.320 | 17.085 | 42.889 | 1.00114.18 | C |
| ATOM | 7078 | CB  | MET | 883 | -83.194 | 16.536 | 43.790 | 1.00114.18 | C |
| ATOM | 7079 | CG  | MET | 883 | -81.823 | 17.192 | 43.624 | 1.00114.18 | C |
| ATOM | 7080 | SD  | MET | 883 | -80.621 | 16.689 | 44.897 | 1.00114.18 | S |
| ATOM | 7081 | CE  | MET | 883 | -80.424 | 14.981 | 44.314 | 1.00114.18 | C |
| ATOM | 7082 | C   | MET | 883 | -84.342 | 18.568 | 42.982 | 1.00114.18 | C |
| ATOM | 7083 | O   | MET | 883 | -83.714 | 19.268 | 42.190 | 1.00114.18 | O |
| ATOM | 7084 | N   | ASP | 884 | -85.115 | 19.073 | 43.957 | 1.0081.26  | N |
| ATOM | 7085 | CA  | ASP | 884 | -85.288 | 20.478 | 44.140 | 0.8881.26  | C |
| ATOM | 7086 | CB  | ASP | 884 | -86.674 | 20.811 | 44.720 | 0.8881.26  | C |
| ATOM | 7087 | CG  | ASP | 884 | -86.865 | 22.318 | 44.747 | 0.8881.26  | C |
| ATOM | 7088 | OD1 | ASP | 884 | -85.888 | 23.046 | 44.434 | 0.8881.26  | O |
| ATOM | 7089 | OD2 | ASP | 884 | -87.995 | 22.761 | 45.084 | 0.8881.26  | O |
| ATOM | 7090 | C   | ASP | 884 | -84.251 | 20.949 | 45.113 | 1.0081.26  | C |
| ATOM | 7091 | O   | ASP | 884 | -84.328 | 20.681 | 46.310 | 1.0081.26  | O |
| ATOM | 7092 | N   | TYR | 885 | -83.217 | 21.616 | 44.571 | 1.00117.45 | N |
| ATOM | 7093 | CA  | TYR | 885 | -82.106 | 22.221 | 45.250 | 1.00117.45 | C |
| ATOM | 7094 | CB  | TYR | 885 | -80.912 | 22.518 | 44.328 | 1.00117.45 | C |
| ATOM | 7095 | CG  | TYR | 885 | -80.347 | 21.212 | 43.888 | 1.00117.45 | C |
| ATOM | 7096 | CD1 | TYR | 885 | -79.437 | 20.550 | 44.678 | 1.00117.45 | C |
| ATOM | 7097 | CD2 | TYR | 885 | -80.736 | 20.638 | 42.699 | 1.00117.45 | C |
| ATOM | 7098 | CE1 | TYR | 885 | -78.910 | 19.343 | 44.283 | 1.00117.45 | C |
| ATOM | 7099 | CE2 | TYR | 885 | -80.212 | 19.432 | 42.300 | 1.00117.45 | C |
| ATOM | 7100 | CZ  | TYR | 885 | -79.296 | 18.783 | 43.090 | 1.00117.45 | C |
| ATOM | 7101 | OH  | TYR | 885 | -78.757 | 17.544 | 42.683 | 1.00117.45 | O |
| ATOM | 7102 | C   | TYR | 885 | -82.489 | 23.512 | 45.910 | 1.00117.45 | C |
| ATOM | 7103 | O   | TYR | 885 | -81.810 | 23.956 | 46.833 | 1.00117.45 | O |
| ATOM | 7104 | N   | LEU | 886 | -83.547 | 24.180 | 45.411 | 1.00144.01 | N |
| ATOM | 7105 | CA  | LEU | 886 | -83.908 | 25.510 | 45.829 | 1.00144.01 | C |
| ATOM | 7106 | CB  | LEU | 886 | -85.156 | 26.040 | 45.106 | 1.00144.01 | C |
| ATOM | 7107 | CG  | LEU | 886 | -84.924 | 26.266 | 43.598 | 1.00144.01 | C |
| ATOM | 7108 | CD1 | LEU | 886 | -84.683 | 24.941 | 42.857 | 1.00144.01 | C |
| ATOM | 7109 | CD2 | LEU | 886 | -86.047 | 27.110 | 42.974 | 1.00144.01 | C |
| ATOM | 7110 | C   | LEU | 886 | -84.139 | 25.586 | 47.315 | 1.00144.01 | C |
| ATOM | 7111 | O   | LEU | 886 | -83.816 | 26.602 | 47.930 | 1.00144.01 | O |
| ATOM | 7112 | N   | SER | 887 | -84.697 | 24.534 | 47.942 | 1.00107.14 | N |
| ATOM | 7113 | CA  | SER | 887 | -84.975 | 24.550 | 49.357 | 1.00107.14 | C |
| ATOM | 7114 | CB  | SER | 887 | -85.751 | 23.300 | 49.818 | 1.00107.14 | C |
| ATOM | 7115 | OG  | SER | 887 | -84.982 | 22.127 | 49.595 | 1.00107.14 | O |
| ATOM | 7116 | C   | SER | 887 | -83.698 | 24.627 | 50.157 | 1.00107.14 | C |
| ATOM | 7117 | O   | SER | 887 | -83.727 | 24.847 | 51.365 | 1.00107.14 | O |
| ATOM | 7118 | N   | THR | 888 | -82.529 | 24.444 | 49.524 | 1.00103.66 | N |
| ATOM | 7119 | CA  | THR | 888 | -81.274 | 24.487 | 50.229 | 1.00103.66 | C |
| ATOM | 7120 | CB  | THR | 888 | -80.112 | 24.188 | 49.329 | 1.00103.66 | C |
| ATOM | 7121 | OG1 | THR | 888 | -80.264 | 22.902 | 48.744 | 1.00103.66 | O |
| ATOM | 7122 | CG2 | THR | 888 | -78.821 | 24.246 | 50.157 | 1.00103.66 | C |
| ATOM | 7123 | C   | THR | 888 | -81.075 | 25.866 | 50.784 | 1.00103.66 | C |
| ATOM | 7124 | O   | THR | 888 | -80.451 | 26.025 | 51.834 | 1.00103.66 | O |
| ATOM | 7125 | N   | GLN | 889 | -81.556 | 26.898 | 50.053 | 1.00174.95 | N |
| ATOM | 7126 | CA  | GLN | 889 | -81.437 | 28.262 | 50.492 | 1.00174.95 | C |
| ATOM | 7127 | CB  | GLN | 889 | -81.384 | 29.298 | 49.359 | 1.00174.95 | C |
| ATOM | 7128 | CG  | GLN | 889 | -82.663 | 29.406 | 48.538 | 1.00174.95 | C |
| ATOM | 7129 | CD  | GLN | 889 | -82.419 | 30.493 | 47.505 | 1.00174.95 | C |
| ATOM | 7130 | OE1 | GLN | 889 | -81.812 | 30.251 | 46.463 | 1.00174.95 | O |
| ATOM | 7131 | NE2 | GLN | 889 | -82.886 | 31.733 | 47.809 | 1.00174.95 | N |
| ATOM | 7132 | C   | GLN | 889 | -82.610 | 28.579 | 51.371 | 1.00174.95 | C |

|      |      |     |     |     |         |        |        |            |   |
|------|------|-----|-----|-----|---------|--------|--------|------------|---|
| ATOM | 7133 | O   | GLN | 889 | -83.662 | 27.952 | 51.276 | 1.00174.95 | O |
| ATOM | 7134 | N   | VAL | 890 | -82.442 | 29.577 | 52.259 | 1.00211.60 | N |
| ATOM | 7135 | CA  | VAL | 890 | -83.400 | 29.897 | 53.283 | 1.00211.60 | C |
| ATOM | 7136 | CB  | VAL | 890 | -82.889 | 30.920 | 54.253 | 1.00211.60 | C |
| ATOM | 7137 | CG1 | VAL | 890 | -82.606 | 32.225 | 53.489 | 1.00211.60 | C |
| ATOM | 7138 | CG2 | VAL | 890 | -83.922 | 31.073 | 55.383 | 1.00211.60 | C |
| ATOM | 7139 | C   | VAL | 890 | -84.723 | 30.387 | 52.774 | 1.00211.60 | C |
| ATOM | 7140 | O   | VAL | 890 | -85.766 | 29.967 | 53.271 | 1.00211.60 | O |
| ATOM | 7141 | N   | ARG | 891 | -84.731 | 31.266 | 51.761 | 1.00273.36 | N |
| ATOM | 7142 | CA  | ARG | 891 | -85.963 | 31.889 | 51.373 | 1.00273.36 | C |
| ATOM | 7143 | CB  | ARG | 891 | -85.776 | 32.848 | 50.198 | 1.00273.36 | C |
| ATOM | 7144 | CG  | ARG | 891 | -87.077 | 33.512 | 49.778 | 1.00273.36 | C |
| ATOM | 7145 | CD  | ARG | 891 | -86.892 | 34.469 | 48.607 | 1.00273.36 | C |
| ATOM | 7146 | NE  | ARG | 891 | -86.439 | 33.663 | 47.443 | 1.00273.36 | N |
| ATOM | 7147 | CZ  | ARG | 891 | -86.299 | 34.264 | 46.226 | 1.00273.36 | C |
| ATOM | 7148 | NH1 | ARG | 891 | -86.556 | 35.598 | 46.094 | 1.00273.36 | N |
| ATOM | 7149 | NH2 | ARG | 891 | -85.899 | 33.533 | 45.146 | 1.00273.36 | N |
| ATOM | 7150 | C   | ARG | 891 | -86.961 | 30.852 | 50.965 | 1.00273.36 | C |
| ATOM | 7151 | O   | ARG | 891 | -88.127 | 30.903 | 51.355 | 1.00273.36 | O |
| ATOM | 7152 | N   | TYR | 892 | -86.499 | 29.874 | 50.176 | 1.00281.91 | N |
| ATOM | 7153 | CA  | TYR | 892 | -87.280 | 28.799 | 49.646 | 1.00281.91 | C |
| ATOM | 7154 | CB  | TYR | 892 | -86.440 | 27.947 | 48.681 | 1.00281.91 | C |
| ATOM | 7155 | CG  | TYR | 892 | -86.175 | 28.793 | 47.477 | 1.00281.91 | C |
| ATOM | 7156 | CD1 | TYR | 892 | -85.385 | 29.920 | 47.528 | 1.00281.91 | C |
| ATOM | 7157 | CD2 | TYR | 892 | -86.709 | 28.440 | 46.267 | 1.00281.91 | C |
| ATOM | 7158 | CE1 | TYR | 892 | -85.153 | 30.684 | 46.404 | 1.00281.91 | C |
| ATOM | 7159 | CE2 | TYR | 892 | -86.480 | 29.197 | 45.144 | 1.00281.91 | C |
| ATOM | 7160 | CZ  | TYR | 892 | -85.705 | 30.326 | 45.201 | 1.00281.91 | C |
| ATOM | 7161 | OH  | TYR | 892 | -85.476 | 31.099 | 44.043 | 1.00281.91 | O |
| ATOM | 7162 | C   | TYR | 892 | -87.772 | 27.935 | 50.769 | 1.00281.91 | C |
| ATOM | 7163 | O   | TYR | 892 | -88.866 | 27.388 | 50.690 | 1.00281.91 | O |
| ATOM | 7164 | N   | LEU | 893 | -86.953 | 27.732 | 51.818 | 1.00252.96 | N |
| ATOM | 7165 | CA  | LEU | 893 | -87.310 | 26.916 | 52.951 | 1.00252.96 | C |
| ATOM | 7166 | CB  | LEU | 893 | -86.168 | 26.778 | 53.976 | 1.00252.96 | C |
| ATOM | 7167 | CG  | LEU | 893 | -85.043 | 25.818 | 53.565 | 1.00252.96 | C |
| ATOM | 7168 | CD1 | LEU | 893 | -83.918 | 25.797 | 54.613 | 1.00252.96 | C |
| ATOM | 7169 | CD2 | LEU | 893 | -85.606 | 24.410 | 53.309 | 1.00252.96 | C |
| ATOM | 7170 | C   | LEU | 893 | -88.445 | 27.522 | 53.708 | 1.00252.96 | C |
| ATOM | 7171 | O   | LEU | 893 | -89.373 | 26.820 | 54.100 | 1.00252.96 | O |
| ATOM | 7172 | N   | GLY | 894 | -88.378 | 28.839 | 53.963 | 1.00787.66 | N |
| ATOM | 7173 | CA  | GLY | 894 | -89.418 | 29.512 | 54.685 | 1.00787.66 | C |
| ATOM | 7174 | C   | GLY | 894 | -90.647 | 29.464 | 53.846 | 1.00787.66 | C |
| ATOM | 7175 | O   | GLY | 894 | -91.763 | 29.413 | 54.357 | 1.00787.66 | O |
| ATOM | 7176 | N   | GLU | 895 | -90.469 | 29.543 | 52.518 | 1.00512.90 | N |
| ATOM | 7177 | CA  | GLU | 895 | -91.587 | 29.512 | 51.632 | 1.00512.90 | C |
| ATOM | 7178 | CB  | GLU | 895 | -91.257 | 29.832 | 50.162 | 1.00512.90 | C |
| ATOM | 7179 | CG  | GLU | 895 | -92.513 | 29.823 | 49.284 | 1.00512.90 | C |
| ATOM | 7180 | CD  | GLU | 895 | -92.147 | 30.229 | 47.863 | 1.00512.90 | C |
| ATOM | 7181 | OE1 | GLU | 895 | -91.093 | 30.896 | 47.686 | 1.00512.90 | O |
| ATOM | 7182 | OE2 | GLU | 895 | -92.926 | 29.881 | 46.935 | 1.00512.90 | O |
| ATOM | 7183 | C   | GLU | 895 | -92.243 | 28.173 | 51.657 | 1.00512.90 | C |
| ATOM | 7184 | O   | GLU | 895 | -93.434 | 28.114 | 51.390 | 1.00512.90 | O |
| ATOM | 7185 | N   | GLU | 896 | -91.498 | 27.060 | 51.838 | 1.00671.97 | N |
| ATOM | 7186 | CA  | GLU | 896 | -92.090 | 25.745 | 51.929 | 1.00671.97 | C |
| ATOM | 7187 | CB  | GLU | 896 | -91.123 | 24.573 | 51.656 | 1.00671.97 | C |
| ATOM | 7188 | CG  | GLU | 896 | -90.889 | 24.266 | 50.170 | 1.00671.97 | C |
| ATOM | 7189 | CD  | GLU | 896 | -89.608 | 24.937 | 49.696 | 1.00671.97 | C |
| ATOM | 7190 | OE1 | GLU | 896 | -88.540 | 24.659 | 50.304 | 1.00671.97 | O |
| ATOM | 7191 | OE2 | GLU | 896 | -89.676 | 25.721 | 48.712 | 1.00671.97 | O |
| ATOM | 7192 | C   | GLU | 896 | -92.728 | 25.485 | 53.260 | 1.00671.97 | C |
| ATOM | 7193 | O   | GLU | 896 | -93.748 | 24.806 | 53.335 | 1.00671.97 | O |
| ATOM | 7194 | N   | GLY | 897 | -92.117 | 25.946 | 54.367 | 1.00744.01 | N |
| ATOM | 7195 | CA  | GLY | 897 | -92.713 | 25.664 | 55.642 | 1.00744.01 | C |
| ATOM | 7196 | C   | GLY | 897 | -94.012 | 26.393 | 55.767 | 1.00744.01 | C |
| ATOM | 7197 | O   | GLY | 897 | -95.010 | 25.828 | 56.210 | 1.00744.01 | O |
| ATOM | 7198 | N   | SER | 898 | -94.008 | 27.692 | 55.414 | 1.00515.56 | N |

|      |      |     |     |     |          |        |        |            |       |   |
|------|------|-----|-----|-----|----------|--------|--------|------------|-------|---|
| ATOM | 7199 | CA  | SER | 898 | -95.169  | 28.525 | 55.515 | 1.00       | 51.56 | C |
| ATOM | 7200 | CB  | SER | 898 | -94.843  | 30.005 | 55.244 | 1.00       | 51.56 | C |
| ATOM | 7201 | OG  | SER | 898 | -96.014  | 30.800 | 55.357 | 1.00       | 51.56 | O |
| ATOM | 7202 | C   | SER | 898 | -96.237  | 28.121 | 54.549 | 1.00       | 51.56 | C |
| ATOM | 7203 | O   | SER | 898 | -97.238  | 27.512 | 54.926 | 1.00       | 51.56 | O |
| ATOM | 7204 | N   | THR | 899 | -96.028  | 28.421 | 53.253 | 1.00131.66 |       | N |
| ATOM | 7205 | CA  | THR | 899 | -97.088  | 28.202 | 52.315 | 1.00131.66 |       | C |
| ATOM | 7206 | CB  | THR | 899 | -96.939  | 28.926 | 50.989 | 1.00131.66 |       | C |
| ATOM | 7207 | OG1 | THR | 899 | -95.725  | 28.626 | 50.321 | 1.00131.66 |       | O |
| ATOM | 7208 | CG2 | THR | 899 | -97.013  | 30.436 | 51.269 | 1.00131.66 |       | C |
| ATOM | 7209 | C   | THR | 899 | -97.438  | 26.749 | 52.154 | 1.00131.66 |       | C |
| ATOM | 7210 | O   | THR | 899 | -98.629  | 26.449 | 52.112 | 1.00131.66 |       | O |
| ATOM | 7211 | N   | PRO | 900 | -96.536  | 25.808 | 52.066 | 1.00128.34 |       | N |
| ATOM | 7212 | CA  | PRO | 900 | -97.000  | 24.458 | 51.931 | 1.00128.34 |       | C |
| ATOM | 7213 | CD  | PRO | 900 | -95.305  | 26.003 | 51.320 | 1.00128.34 |       | C |
| ATOM | 7214 | CB  | PRO | 900 | -95.810  | 23.636 | 51.447 | 1.00128.34 |       | C |
| ATOM | 7215 | CG  | PRO | 900 | -94.987  | 24.658 | 50.648 | 1.00128.34 |       | C |
| ATOM | 7216 | C   | PRO | 900 | -97.695  | 23.882 | 53.127 | 1.00128.34 |       | C |
| ATOM | 7217 | O   | PRO | 900 | -98.524  | 22.992 | 52.942 | 1.00128.34 |       | O |
| ATOM | 7218 | N   | GLY | 901 | -97.377  | 24.338 | 54.351 | 1.00       | 38.92 | N |
| ATOM | 7219 | CA  | GLY | 901 | -97.984  | 23.759 | 55.512 | 1.00       | 38.92 | C |
| ATOM | 7220 | C   | GLY | 901 | -99.442  | 24.037 | 55.467 | 1.00       | 38.92 | C |
| ATOM | 7221 | O   | GLY | 901 | -100.261 | 23.150 | 55.700 | 1.00       | 38.92 | O |
| ATOM | 7222 | N   | VAL | 902 | -99.808  | 25.291 | 55.151 | 1.00202.98 |       | N |
| ATOM | 7223 | CA  | VAL | 902 | -101.200 | 25.587 | 55.120 | 1.00202.98 |       | C |
| ATOM | 7224 | CB  | VAL | 902 | -101.530 | 26.938 | 55.689 | 1.00202.98 |       | C |
| ATOM | 7225 | CG1 | VAL | 902 | -101.237 | 26.893 | 57.200 | 1.00202.98 |       | C |
| ATOM | 7226 | CG2 | VAL | 902 | -100.703 | 28.013 | 54.961 | 1.00202.98 |       | C |
| ATOM | 7227 | C   | VAL | 902 | -101.656 | 25.493 | 53.702 | 1.00202.98 |       | C |
| ATOM | 7228 | O   | VAL | 902 | -101.452 | 26.390 | 52.886 | 1.00202.98 |       | O |
| ATOM | 7229 | N   | LEU | 903 | -102.333 | 24.381 | 53.379 | 1.00       | 48.89 | N |
| ATOM | 7230 | CA  | LEU | 903 | -102.777 | 24.185 | 52.035 | 1.00       | 48.89 | C |
| ATOM | 7231 | CB  | LEU | 903 | -103.674 | 25.321 | 51.520 | 1.00       | 48.89 | C |
| ATOM | 7232 | CG  | LEU | 903 | -105.009 | 25.424 | 52.277 | 1.00       | 48.89 | C |
| ATOM | 7233 | CD1 | LEU | 903 | -105.873 | 26.571 | 51.730 | 1.00       | 48.89 | C |
| ATOM | 7234 | CD2 | LEU | 903 | -105.743 | 24.074 | 52.294 | 1.00       | 48.89 | C |
| ATOM | 7235 | C   | LEU | 903 | -101.539 | 24.112 | 51.155 | 1.00       | 48.89 | C |
| ATOM | 7236 | O   | LEU | 903 | -100.866 | 23.048 | 51.182 | 1.00       | 48.89 | O |
| ATOM | 7237 | OXT | LEU | 903 | -101.251 | 25.113 | 50.445 | 1.00       | 48.89 | O |

END
